# Supplementary material for: Mechanisms and origins of stereoselectivity in the NHC-catalyzed oxidative reaction of enals and pyrroles: a density functional theory study
Source: Royal Society of Chemistry journal article supplement (doi:10.1039/d4cp03349c), 2024-01-01
Supplement: d4cp03349c1.pdf [file d4cp03349c1.pdf]

*Supporting Information*

**Mechanisms and Origins of Stereoselectivity in NHC-Catalyzed Oxidative  
Reaction of Enals and Pyrroles: A Density Functional Theory Study**

**Yan Li\*, Mingchao Zhang, Zhiqiang Zhang\***

*School of Chemical Engineering, University of Science and Technology Liaoning,  
Anshan, Liaoning 114051, P. R. China*

**\* E-mail: [yanli@ustl.edu.cn](mailto:yanli@ustl.edu.cn);**

**Telephone: +86-412-5929627**

**Fax: 86-412-5929627**

**\*E-mail: [zzq@ustl.edu.com](mailto:zzq@ustl.edu.com)**

## Content

|                                                                              |            |
|------------------------------------------------------------------------------|------------|
| <b>1. Computational Details.....</b>                                         | <b>S1</b>  |
| <b>2. Test Results of Computational Methods.....</b>                         | <b>S3</b>  |
| Table S1 Different computational levels.....                                 | S3         |
| Table S2 Relative energies (kcal/mol) at different computational levels..... | S3         |
| <b>3. Additionally Computational Results.....</b>                            | <b>S4</b>  |
| Fig. S1 The deprotonation of Pre-NHC by DMAP to generate NHC.....            | S4         |
| Fig. S2 The deprotonation of Pre-R2 to generate R2 .....                     | S5         |
| Fig. S3 Possible pathways for the formation of M2 .....                      | S6         |
| <b>4. Possible Pathways For the Oxidation Process.....</b>                   | <b>S7</b>  |
| Scheme S1. Other possible HCT pathways.....                                  | S7         |
| <b>5. Unfavorable Pathways for the Reaction of M3 and R2.....</b>            | <b>S8</b>  |
| Fig. S4 Unfavorable pathways for the reaction of M3 and R2.....              | S8         |
| <b>6. Conformational Search of TS4.....</b>                                  | <b>S9</b>  |
| Table S3. Energies of different conformations of TS4.....                    | S9         |
| <b>7. NCI and AIM analyses.....</b>                                          | <b>S10</b> |
| Fig. S5 NCI and AIM analyses for TS4RR and TS4SS.....                        | S10        |
| <b>8. Cartesian Coordinates.....</b>                                         | <b>S11</b> |

## 1. Computational Details

### 1.1 Global reactivity indexes (GRI) analysis

To disclose the role of the NHC, we performed the global reactivity index (GRI) analyses. The molecular global electrophilicity character is described with the electrophilicity index  $\omega$ , which can be calculated from the expression  $\omega = (\mu^2/2\eta)$  (eV), in which  $\mu$  and  $\eta$  are the electronic chemical potential and the chemical hardness, respectively. The values of  $\mu$  and  $\eta$  can be calculated from the following expressions  $\mu \approx (E_H + E_L)/2$  and  $\eta \approx (E_H - E_L)$ , in which  $E_H$  is and  $E_L$  are the one-electron energies of the frontier molecular orbital HOMO and LUMO, respectively. Within the Kohn–Sham scheme, Domingo and coworkers introduce relative nucleophilicity index  $N$ , defined as  $N = E_H(\text{Nu}) - E_H(\text{TCE})$ . This nucleophilicity scale takes tetracyanoethylene (TCE) as a reference.

### 1.2 Distortion-interaction analysis

In distortion-interaction analysis, the transition state was divided into two fragments, followed by single point energy calculations on each fragment. The activation energy  $\Delta E^\ddagger$  was divided into  $\Delta E_{\text{dist}}^\ddagger$  and  $\Delta E_{\text{int}}^\ddagger$ , where  $\Delta E_{\text{dist}}^\ddagger$  and  $\Delta E_{\text{int}}^\ddagger$  are distortion energy and interaction energy, respectively. The distortion energy  $\Delta E_{\text{dist}}^\ddagger$  of each fragment is the energy difference between the distorted fragment and the corresponding optimized structure without the other fragment. The interaction energy  $\Delta E_{\text{int}}^\ddagger$  can be calculated using  $\Delta E_{\text{int}}^\ddagger = \Delta E^\ddagger - \Delta E_{\text{dist}}^\ddagger$ .

### 1.3 Calculation of enantiomeric excess (ee)

The extent of enantioselectivity, in terms of enantiomeric excess (ee %), was calculated by using the Boltzmann distribution of diastereomeric transition states with the following equations:

$$\frac{[R]}{[S]} = \frac{\exp(-G_{[R]}^\ddagger)}{\exp(-G_{[S]}^\ddagger)} = \exp(\Delta G^\ddagger / RT) \quad (1)$$

$$ee = \frac{[R]-[S]}{[R]+[S]} \times 100\% = \frac{\frac{[R]}{[S]} - 1}{\frac{[R]}{[S]} + 1} \times 100\% \quad (2)$$

Where  $G^\ddagger$  is the Gibbs free energy barrier of the competing diastereomeric transition state and  $\Delta G^\ddagger$  is the Gibbs free energy difference between the two diastereomeric transition states.

## 2. Test results of computational methods

**Table S1** Different computational levels for single-point energies.

| Level | Functional      | Basis set         | Solvent model |
|-------|-----------------|-------------------|---------------|
| L1    | M06-2X-D3       | 6-311++G(2df,2pd) | IEFPCM        |
| L2    | M06-2X-D3       | 6-311++G(2df,2pd) | SMD           |
| L3    | $\omega$ B97X-D | 6-311++G(2df,2pd) | IEFPCM        |
| L4    | M06-2X-D3       | 6-311++G(d,p)     | IEFPCM        |
| L5    | M06-2X          | 6-31G(d,p)        | IEFPCM        |
| L6    | M06-2X-D3       | def2-TZVP         | IEFPCM        |

It should be noted that the single-point energies of L1~L5 were based on the geometries optimized at IEF-PCM(toluene)M06-2X/6-31G(d,p) level, and the single-point energy of L6 was based on the geometries optimized at IEF-PCM(toluene)M06-2X/def2-SVP level.

**Table S2** Relative energies (kcal/mol) at different computational levels.

|       | L1  | L2  | L3  | L4  | L5  | L6  |
|-------|-----|-----|-----|-----|-----|-----|
| TS4RR | 3.7 | 3.9 | 2.8 | 3.9 | 3.4 | 7.1 |
| TS4RS | 0.0 | 0.0 | 0.0 | 0.0 | 0.0 | 0.0 |
| TS4SR | 3.6 | 2.7 | 2.0 | 3.7 | 4.1 | 4.1 |
| TS4SS | 6.6 | 5.3 | 3.7 | 7.0 | 7.5 | 8.1 |

### 3. Additionally computational results

**Fig. S1** The deprotonation of **Pre-NHC** to generate **NHC**. Energies and distances are given in kcal/mol and Å, respectively.

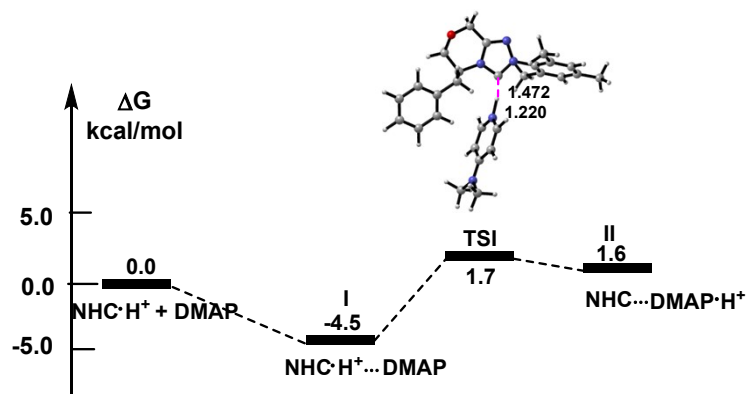

**Fig. S2** The deprotonation of **Pre-R2** to generate **R2**. Energies and distances are given in kcal/mol and Å, respectively.

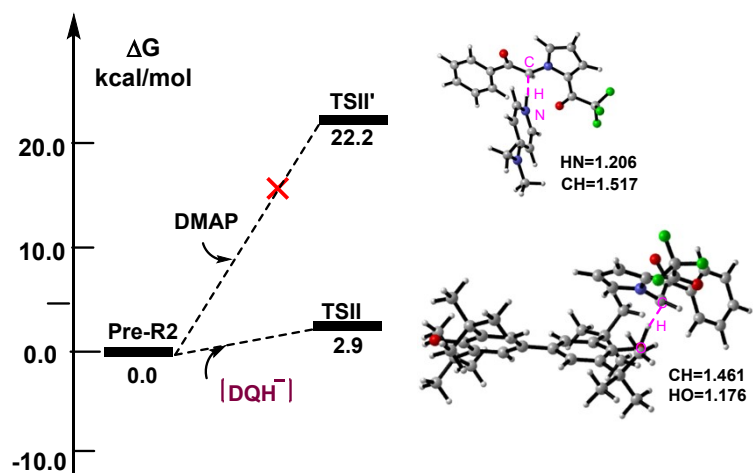

**Fig. S3** Possible pathways for [1,2]-proton transfer. Energies and distances are given in kcal/mol and Å, respectively.

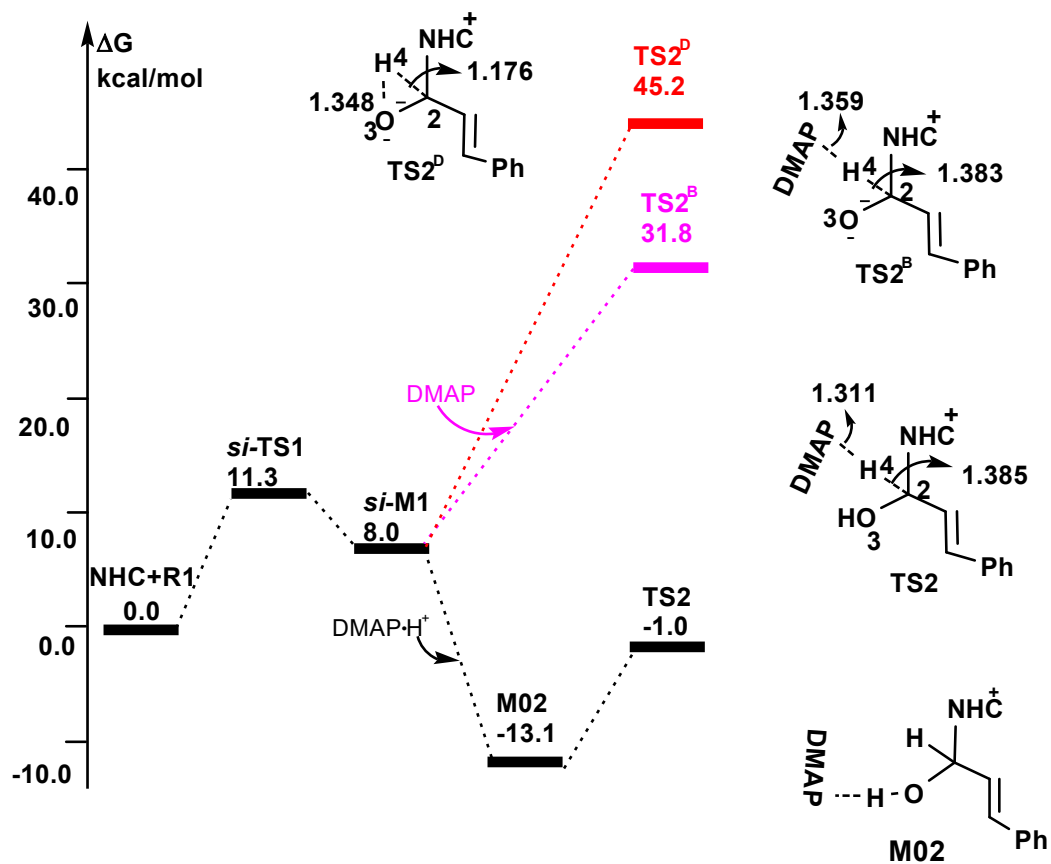



#### 4. Possible pathways for the oxidation process (M2 → M3).

As presented in Scheme S1, four possible HTC pathways corresponding to the hydride H4 transfers from the O3 atom to four different types of carbon atoms (C2, C3, C4 and C5) of DQ have been investigated. The energy barriers are calculated to be 40.1 (TS3<sup>HTC\_C2</sup>), 26.3 (TS3<sup>HTC\_C3</sup>), 27.8 (TS3<sup>HTC\_C4</sup>) and 35.5 (TS3<sup>HTC\_C5</sup>), which are much higher than the HTO pathway (TS3, 12.3 kcal/mol). Therefore, the HTC pathways can be ruled out.

Scheme S1. Other possible HTC pathways.

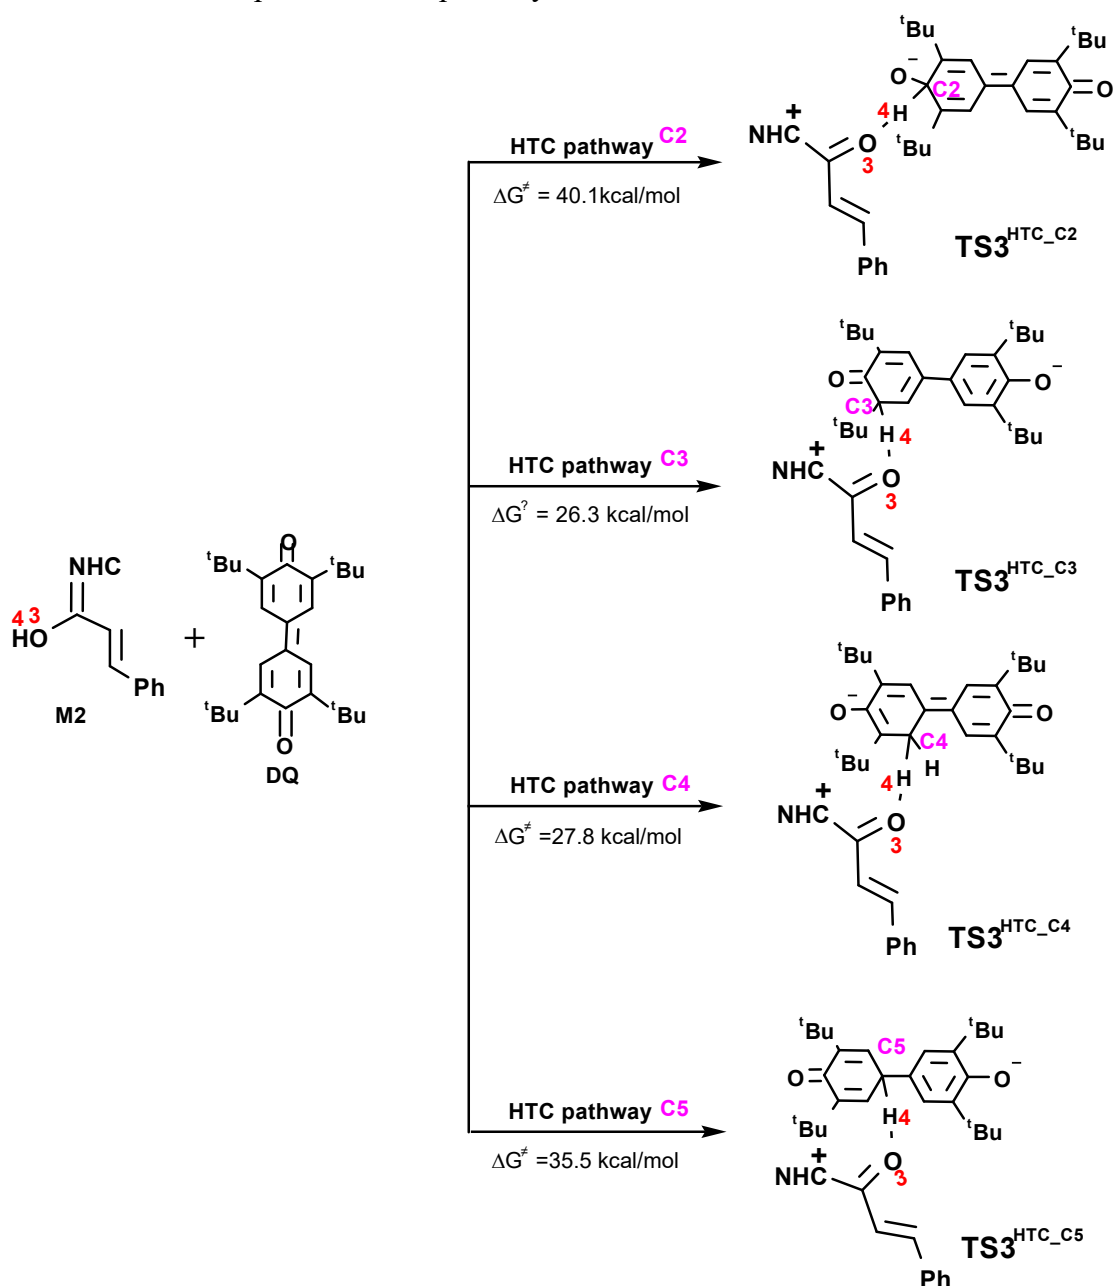

## 5. Unfavorable pathways for the reaction of M3 and R2.

Fig. S4 Unfavorable pathways for the reaction of M3 and R2. Energies are given in kcal/mol.

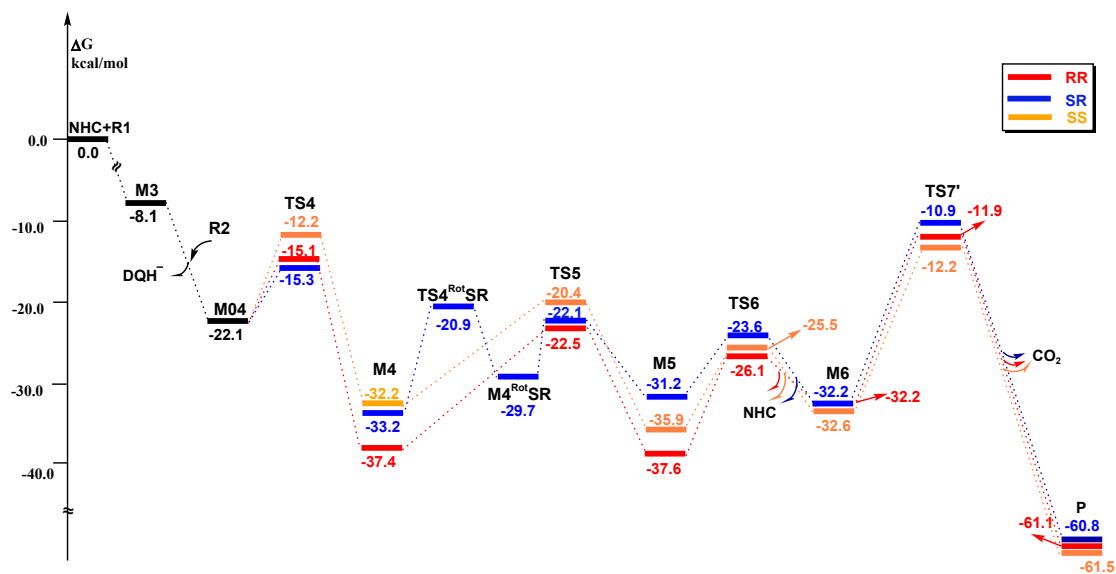

It should be noted that TS7' (*i.e.* TS7RR', TS7SR' and TS7SS') corresponds to the transition state for direct decarboxylation of M6.

## 6. Conformational search of TS4.

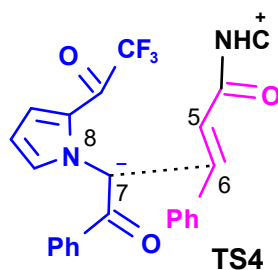

Table S3. Energies of different conformations of the stereoselective transition states.

| species      | Dihedral angle<br>C5-C6-C7-N8 | Free energies<br>(a.u.) | relative energies<br>(kcal/mol) |
|--------------|-------------------------------|-------------------------|---------------------------------|
| <b>TS4RR</b> | <b>-71.75</b>                 | <b>-2518.7413179</b>    | <b>0.0</b>                      |
| TS4RR'       | -144.61                       | -2518.7400772           | 0.8                             |
| TS4RR''      | 70.25                         | -2518.7413504           | 0.0                             |
| TS4RR'''     | 131.03                        | -2518.7365735           | 3.0                             |
| <b>TS4RS</b> | <b>78.63</b>                  | <b>-2518.7472606</b>    | <b>0.0</b>                      |
| TS4RS'       | -47.74                        | -2518.7424075           | 3.0                             |
| TS4RS''      | -98.36                        | -2518.7320108           | 9.6                             |
| TS4RS'''     | 171.53                        | -2518.7397611           | 4.7                             |
| <b>TS4SR</b> | <b>54.56</b>                  | <b>-2518.7415346</b>    | <b>0.0</b>                      |
| TS4SR'       | 38.43                         | -2518.7321354           | 5.9                             |
| TS4SR''      | 146.22                        | -2518.7271208           | 9.0                             |
| TS4SR'''     | -145.41                       | -2518.7353066           | 3.9                             |
| <b>TS4SS</b> | <b>74.23</b>                  | <b>-2518.7384829</b>    | <b>0.0</b>                      |
| TS4SS'       | 110.06                        | -2518.7366673           | 1.1                             |
| TS4SS''      | 147.24                        | -2518.7235251           | 9.4                             |
| TS4SS'''     | -9.15                         | -2518.7217146           | 10.5                            |

## 7. NCI and AIM analyses for TS4RR and TS4SS.

**Fig. S5** NCI and AIM analyses for **TS4RR** and **TS4SS** (isosurface = 0.008). Distances are given in Å. The Laplacian of electron density ( $\nabla^2\rho$ ,  $10^{-1}$  a.u.) are given in parentheses. The blue, green, and red regions represent strong, weak, and repulsive interactions, respectively.

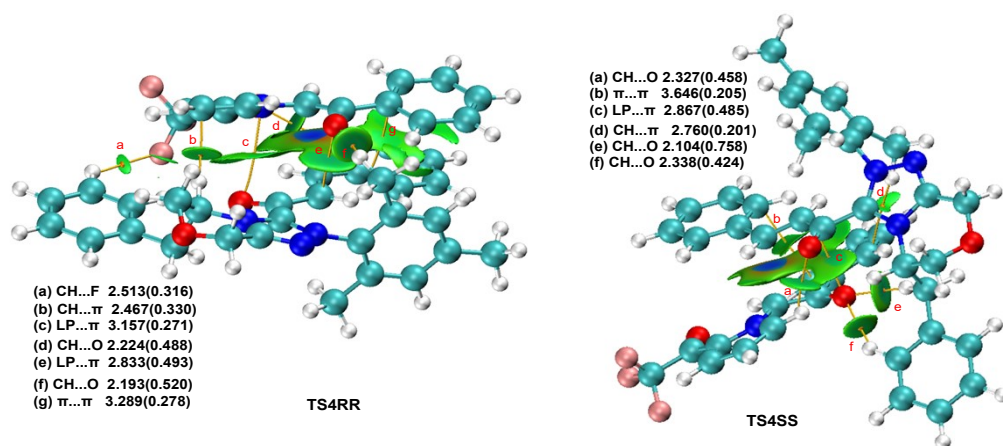

## 8. Coordinates

### DMAP

|   |             |             |             |
|---|-------------|-------------|-------------|
| C | -1.94847700 | 1.12920100  | 0.00155900  |
| C | -0.56426000 | 1.19695200  | 0.00115300  |
| C | 0.18374300  | 0.00025300  | 0.00016500  |
| C | -0.56360700 | -1.19681600 | -0.00018000 |
| C | -1.94785600 | -1.12980000 | 0.00034200  |
| H | -2.52001600 | 2.05558200  | 0.00229500  |
| H | -0.08253100 | 2.16624300  | 0.00192200  |
| H | -0.08130600 | -2.16584300 | -0.00104900 |
| H | -2.51888600 | -2.05649400 | 0.00000800  |
| C | 2.26934200  | -1.25736600 | 0.00014800  |
| C | 2.26936000  | 1.25821900  | -0.00242700 |
| H | 2.03473300  | -1.85553200 | -0.88866900 |
| H | 3.33963100  | -1.05569200 | 0.00171300  |
| H | 2.03237000  | -1.85583800 | 0.88808300  |
| H | 2.03058300  | 1.85658000  | -0.88993900 |
| H | 2.03668900  | 1.85653500  | 0.88680800  |
| H | 3.33963200  | 1.05649000  | -0.00621000 |
| N | 1.54947100  | 0.00042500  | -0.00031100 |
| N | -2.66387600 | -0.00049300 | 0.00115000  |

### DMAP·H<sup>+</sup>

|   |             |             |             |
|---|-------------|-------------|-------------|
| C | 1.87814500  | 1.17875300  | -0.00170300 |
| C | 0.51514300  | 1.21653700  | -0.00116000 |
| C | -0.23553100 | 0.00017900  | 0.00008300  |
| C | 0.51480300  | -1.21639100 | 0.00082900  |
| C | 1.87781900  | -1.17900200 | 0.00024300  |
| H | 2.48603700  | 2.07424100  | -0.00264100 |
| H | 0.02870700  | 2.18125000  | -0.00171200 |
| H | 0.02807400  | -2.18095600 | 0.00197700  |
| H | 2.48546400  | -2.07465800 | 0.00077900  |
| C | -2.30504500 | -1.26291500 | 0.00188200  |
| C | -2.30465400 | 1.26388700  | 0.00041800  |
| H | -2.06899000 | -1.84821100 | 0.89511900  |
| H | -3.37081200 | -1.04914200 | 0.00123800  |
| H | -2.06842700 | -1.85025600 | -0.88984400 |
| H | -2.06769500 | 1.85046800  | 0.89256300  |
| H | -2.06857300 | 1.84979500  | -0.89240000 |
| H | -3.37048500 | 1.05044400  | 0.00099000  |
| N | -1.56888200 | 0.00037200  | 0.00055100  |
| N | 2.54208500  | -0.00021500 | -0.00104400 |
| H | 3.55404000  | -0.00034600 | -0.00139100 |

**NHC·H<sup>+</sup>**

|   |              |              |              |
|---|--------------|--------------|--------------|
| C | 8. 17762700  | -0. 11167400 | -2. 94086300 |
| C | 9. 56065000  | 0. 39821200  | -2. 53008500 |
| H | 7. 75930100  | -0. 75164800 | -2. 15867900 |
| H | 9. 53506200  | 0. 80639100  | -1. 51036600 |
| N | 7. 32643400  | 1. 10014400  | -3. 03452300 |
| O | 9. 98808400  | 1. 38164400  | -3. 45563600 |
| C | 7. 82428600  | 2. 36055100  | -3. 24854600 |
| C | 9. 30729000  | 2. 60233400  | -3. 28463200 |
| H | 9. 55589200  | 3. 25091500  | -4. 12570400 |
| H | 9. 60793600  | 3. 10041700  | -2. 35250200 |
| N | 6. 85825500  | 3. 23150100  | -3. 35684300 |
| C | 5. 99495000  | 1. 21856600  | -3. 03222600 |
| N | 5. 72352400  | 2. 49937500  | -3. 21732000 |
| C | 4. 41983400  | 3. 11306300  | -3. 27814600 |
| C | 3. 94234400  | 3. 50219600  | -4. 53147500 |
| C | 3. 71950100  | 3. 29719900  | -2. 08442500 |
| C | 2. 68205100  | 4. 09312900  | -4. 56672000 |
| C | 2. 46271700  | 3. 89034800  | -2. 17977000 |
| C | 1. 93114300  | 4. 29353000  | -3. 40637400 |
| H | 2. 27750800  | 4. 40543500  | -5. 52553500 |
| H | 1. 88857500  | 4. 04858700  | -1. 27075300 |
| H | 10. 27808800 | -0. 42190000 | -2. 56878900 |
| C | 8. 17374200  | -0. 82492400 | -4. 30286000 |
| H | 7. 14129100  | -1. 09333100 | -4. 55336200 |
| H | 8. 52556200  | -0. 11281800 | -5. 05575200 |
| C | 9. 05216100  | -2. 05191400 | -4. 29137100 |
| C | 8. 58350700  | -3. 25857200 | -3. 76704100 |
| C | 10. 36125300 | -1. 98225500 | -4. 77401900 |
| C | 9. 40814500  | -4. 37940300 | -3. 73017500 |
| H | 7. 56321600  | -3. 32617000 | -3. 39688000 |
| C | 11. 18737800 | -3. 10240600 | -4. 73802800 |
| H | 10. 73219700 | -1. 04364000 | -5. 17910000 |
| C | 10. 71124400 | -4. 30280400 | -4. 21639500 |
| H | 9. 03123800  | -5. 31412000 | -3. 32832700 |
| H | 12. 20024400 | -3. 03783300 | -5. 12139300 |
| H | 11. 35214200 | -5. 17773300 | -4. 19280100 |
| C | 0. 58464800  | 4. 96312900  | -3. 47119200 |
| H | 0. 68980900  | 6. 04115900  | -3. 31347700 |
| H | 0. 11456800  | 4. 81412500  | -4. 44516900 |
| H | -0. 08497800 | 4. 57959100  | -2. 69869300 |
| C | 4. 75847600  | 3. 29668600  | -5. 77917600 |
| H | 5. 63463500  | 3. 95154200  | -5. 78363900 |
| H | 5. 11753000  | 2. 26539200  | -5. 85791200 |

|          |              |              |              |
|----------|--------------|--------------|--------------|
| H        | 4. 16242200  | 3. 51693700  | -6. 66512600 |
| C        | 4. 29336300  | 2. 88134000  | -0. 75483800 |
| H        | 4. 26088300  | 1. 79488700  | -0. 62200900 |
| H        | 5. 33406500  | 3. 20234900  | -0. 65270400 |
| H        | 3. 72106300  | 3. 32777200  | 0. 05890200  |
| H        | 5. 26783000  | 0. 42979000  | -2. 90150800 |
| <b>I</b> |              |              |              |
| C        | 2. 00305500  | -0. 16790600 | 0. 18322900  |
| C        | 3. 43684000  | 0. 04132700  | 0. 67834000  |
| H        | 1. 43236700  | -0. 75453000 | 0. 90944600  |
| H        | 3. 44471700  | 0. 29325100  | 1. 74765100  |
| N        | 1. 39268800  | 1. 17807500  | 0. 13190100  |
| O        | 4. 06304100  | 1. 06386300  | -0. 07650700 |
| C        | 2. 08877300  | 2. 35824300  | 0. 15632000  |
| C        | 3. 58572700  | 2. 34219100  | 0. 27465800  |
| H        | 4. 02203200  | 3. 06869800  | -0. 41157700 |
| H        | 3. 87293700  | 2. 60671100  | 1. 30193100  |
| N        | 1. 27830900  | 3. 37710100  | 0. 08480900  |
| C        | 0. 09858600  | 1. 49499500  | 0. 01095600  |
| N        | 0. 03956600  | 2. 81752400  | -0. 00696700 |
| C        | -1. 14889000 | 3. 62541100  | -0. 07850900 |
| C        | -1. 24355300 | 4. 57332700  | -1. 10504300 |
| C        | -2. 15268200 | 3. 41812500  | 0. 87286100  |
| C        | -2. 40215000 | 5. 34255700  | -1. 14895800 |
| C        | -3. 29114900 | 4. 21841800  | 0. 77605100  |
| C        | -3. 43179700 | 5. 18501600  | -0. 21790900 |
| H        | -2. 50595500 | 6. 08256800  | -1. 93818400 |
| H        | -4. 08544600 | 4. 08240000  | 1. 50473900  |
| H        | 4. 00762100  | -0. 87579400 | 0. 52496800  |
| C        | 1. 92793100  | -0. 82808400 | -1. 19951100 |
| H        | 0. 89278600  | -0. 76321300 | -1. 55504100 |
| H        | 2. 56318100  | -0. 26374300 | -1. 88957500 |
| C        | 2. 35359400  | -2. 27468500 | -1. 12596200 |
| C        | 1. 51196300  | -3. 20795800 | -0. 51400400 |
| C        | 3. 58372000  | -2. 69772700 | -1. 63100500 |
| C        | 1. 88890200  | -4. 54259700 | -0. 41462900 |
| H        | 0. 55148200  | -2. 88548100 | -0. 12096800 |
| C        | 3. 96332400  | -4. 03536500 | -1. 53279600 |
| H        | 4. 24402800  | -1. 97824200 | -2. 10857100 |
| C        | 3. 11727800  | -4. 95945700 | -0. 92553300 |
| H        | 1. 22053600  | -5. 25640000 | 0. 05814400  |
| H        | 4. 91950000  | -4. 35474600 | -1. 93381100 |
| H        | 3. 41307600  | -6. 00070700 | -0. 85254200 |
| C        | -4. 65678400 | 6. 05769000  | -0. 28319500 |

|   |             |             |             |
|---|-------------|-------------|-------------|
| H | -4.43224100 | 7.05982300  | 0.09462500  |
| H | -5.00637000 | 6.16613000  | -1.31263100 |
| H | -5.46990600 | 5.64658000  | 0.31749500  |
| C | -0.15762100 | 4.75630900  | -2.13267100 |
| H | 0.69354300  | 5.29820700  | -1.71334900 |
| H | 0.21566800  | 3.79510100  | -2.49775200 |
| H | -0.54103000 | 5.32036700  | -2.98370400 |
| C | -2.04680000 | 2.38058000  | 1.96294100  |
| H | -2.28347000 | 1.37801600  | 1.58803200  |
| H | -1.04486700 | 2.35128700  | 2.40106500  |
| H | -2.75539000 | 2.60783600  | 2.76024600  |
| H | -0.71689300 | 0.76023700  | -0.03538000 |
| C | -1.89077500 | -1.88438000 | -0.71388300 |
| C | -2.16629000 | -3.22439300 | -0.52334800 |
| C | -1.95864500 | -3.80403900 | 0.75212800  |
| C | -1.48601200 | -2.93023600 | 1.76203200  |
| C | -1.24921700 | -1.60495200 | 1.45104400  |
| H | -2.04414600 | -1.44371300 | -1.69605100 |
| H | -2.53211300 | -3.80930300 | -1.35657300 |
| H | -1.30658800 | -3.27653500 | 2.77106400  |
| H | -0.88642100 | -0.93267000 | 2.22835500  |
| C | -1.96925600 | -5.66306800 | 2.31929700  |
| C | -2.66362600 | -5.97615600 | -0.08330400 |
| H | -2.59846900 | -5.16491000 | 3.06495300  |
| H | -2.22025700 | -6.72193400 | 2.31448800  |
| H | -0.92102100 | -5.55933600 | 2.62220000  |
| H | -3.63422800 | -5.64074500 | -0.46470000 |
| H | -1.95003000 | -5.99917700 | -0.91452000 |
| H | -2.77772500 | -6.98929300 | 0.29728500  |
| N | -2.19187000 | -5.11738800 | 0.99082000  |
| N | -1.42778400 | -1.05886300 | 0.23832700  |

**TSI**

|   |            |             |             |
|---|------------|-------------|-------------|
| C | 7.87892800 | 0.04444900  | -3.04604300 |
| C | 9.33189600 | 0.41900400  | -2.74582500 |
| H | 7.45913300 | -0.52907500 | -2.21270300 |
| H | 9.42750500 | 0.80374400  | -1.72074200 |
| N | 7.13554400 | 1.30766700  | -3.13536000 |
| O | 9.77679400 | 1.38547600  | -3.68130800 |
| C | 7.71508700 | 2.52988200  | -3.35516700 |
| C | 9.20907500 | 2.65516200  | -3.43611000 |
| H | 9.48981600 | 3.31282700  | -4.25956600 |
| H | 9.59251800 | 3.08041600  | -2.49812100 |
| N | 6.80706000 | 3.45752800  | -3.43525200 |



|   |              |              |              |
|---|--------------|--------------|--------------|
| C | 5. 79071900  | 1. 45583400  | -3. 08964300 |
| N | 5. 63286800  | 2. 76959000  | -3. 26751200 |
| C | 4. 37978400  | 3. 46988500  | -3. 30875000 |
| C | 3. 94405600  | 3. 97632100  | -4. 53610600 |
| C | 3. 65143000  | 3. 61029900  | -2. 12552500 |
| C | 2. 72006600  | 4. 64152800  | -4. 55641600 |
| C | 2. 43207800  | 4. 28176100  | -2. 19968800 |
| C | 1. 95320900  | 4. 80448100  | -3. 40161500 |
| H | 2. 35551800  | 5. 04017200  | -5. 49975600 |
| H | 1. 84566000  | 4. 40551700  | -1. 29262600 |
| H | 9. 96934900  | -0. 46036500 | -2. 85479500 |
| C | 7. 73076500  | -0. 74850000 | -4. 35458600 |
| H | 6. 67841800  | -0. 71666700 | -4. 65929600 |
| H | 8. 31694700  | -0. 24323800 | -5. 12933300 |
| C | 8. 16366500  | -2. 18238200 | -4. 17964600 |
| C | 7. 27828400  | -3. 10414300 | -3. 61296600 |
| C | 9. 44536800  | -2. 60680400 | -4. 53417400 |
| C | 7. 66474100  | -4. 42314600 | -3. 40308600 |
| H | 6. 27380500  | -2. 78273600 | -3. 34329300 |
| C | 9. 83615100  | -3. 92771600 | -4. 32356400 |
| H | 10. 13792700 | -1. 89983500 | -4. 98489500 |
| C | 8. 94773800  | -4. 83751300 | -3. 75704300 |
| H | 6. 96396600  | -5. 12925300 | -2. 96788100 |
| H | 10. 83391000 | -4. 24612200 | -4. 60696800 |
| H | 9. 25172400  | -5. 86652600 | -3. 59617600 |
| C | 0. 64845700  | 5. 55576100  | -3. 44634200 |
| H | 0. 81321200  | 6. 62088900  | -3. 25545300 |
| H | 0. 17343900  | 5. 46484300  | -4. 42560300 |
| H | -0. 04637500 | 5. 18734900  | -2. 68850600 |
| C | 4. 76669200  | 3. 80488200  | -5. 78511900 |
| H | 5. 66974900  | 4. 42019300  | -5. 74452400 |
| H | 5. 08910600  | 2. 76569400  | -5. 90761400 |
| H | 4. 19085600  | 4. 09303800  | -6. 66561600 |
| C | 4. 15864700  | 3. 05840400  | -0. 81855600 |
| H | 4. 07284000  | 1. 96706800  | -0. 78729800 |
| H | 5. 21176700  | 3. 31027800  | -0. 66469400 |
| H | 3. 58281600  | 3. 46492200  | 0. 01414500  |
| H | 4. 91162700  | 0. 28464500  | -2. 93783400 |
| C | 3. 86690600  | -1. 35837400 | -3. 99424100 |
| C | 3. 35638500  | -2. 63176000 | -4. 02676800 |
| C | 3. 34191400  | -3. 41344100 | -2. 83743300 |
| C | 3. 87154500  | -2. 79989500 | -1. 66751800 |
| C | 4. 35969300  | -1. 51807900 | -1. 73605300 |
| H | 3. 89669600  | -0. 73767300 | -4. 88522400 |

|   |            |             |             |
|---|------------|-------------|-------------|
| H | 2.97491400 | -3.01774700 | -4.96170000 |
| H | 3.89901100 | -3.32106700 | -0.72067000 |
| H | 4.77654500 | -1.02454600 | -0.86249800 |
| C | 2.86956000 | -5.43739700 | -1.58355400 |
| C | 2.33222000 | -5.26424500 | -4.04231400 |
| H | 2.28365400 | -4.93859400 | -0.80530300 |
| H | 2.42909500 | -6.41412100 | -1.77076900 |
| H | 3.89205000 | -5.58313400 | -1.21936200 |
| H | 1.48870000 | -4.68520800 | -4.43098400 |
| H | 3.10636500 | -5.32875600 | -4.81382300 |
| H | 1.98336400 | -6.27037700 | -3.82077900 |
| N | 2.85741500 | -4.66702900 | -2.82055400 |
| N | 4.36313800 | -0.80375900 | -2.87454100 |

### I

|   |             |             |             |
|---|-------------|-------------|-------------|
| C | 2.29113400  | -0.05694900 | 0.29417300  |
| C | 3.74291000  | 0.29030700  | 0.63010100  |
| H | 1.85163900  | -0.64434200 | 1.10739200  |
| H | 3.82120900  | 0.65512500  | 1.66410300  |
| N | 1.56296500  | 1.21351500  | 0.21707900  |
| O | 4.22307000  | 1.26624700  | -0.27731200 |
| C | 2.16569100  | 2.42977800  | 0.02472100  |
| C | 3.66204400  | 2.53835300  | -0.02620700 |
| H | 3.96678400  | 3.20439900  | -0.83419800 |
| H | 4.03269300  | 2.94623100  | 0.92466800  |
| N | 1.27431800  | 3.37157100  | -0.05806800 |
| C | 0.21368900  | 1.37122100  | 0.24123500  |
| N | 0.08739100  | 2.69417700  | 0.08011100  |
| C | -1.14998300 | 3.41866300  | 0.02169800  |
| C | -1.54658700 | 3.95533700  | -1.20653400 |
| C | -1.90422000 | 3.55906100  | 1.18884100  |
| C | -2.75256300 | 4.65169600  | -1.24502400 |
| C | -3.10555500 | 4.26132200  | 1.09750800  |
| C | -3.54227400 | 4.81651700  | -0.10558200 |
| H | -3.08415200 | 5.07473900  | -2.18994000 |
| H | -3.71028600 | 4.38456400  | 1.99242800  |
| H | 4.37062200  | -0.59574300 | 0.51896400  |
| C | 2.15916500  | -0.82017200 | -1.03318800 |
| H | 1.10978300  | -0.78123500 | -1.34642100 |
| H | 2.74946800  | -0.29330400 | -1.78993200 |
| C | 2.59939800  | -2.25586100 | -0.89505500 |
| C | 1.74054300  | -3.18941400 | -0.30667200 |
| C | 3.86514600  | -2.67263900 | -1.31058900 |
| C | 2.13637800  | -4.51143800 | -0.13634100 |

|   |             |             |             |
|---|-------------|-------------|-------------|
| H | 0.74825300  | -2.87548200 | 0.01250200  |
| C | 4.26534100  | -3.99686500 | -1.14124600 |
| H | 4.53790400  | -1.95616700 | -1.77569500 |
| C | 3.40279600  | -4.91814100 | -0.55360000 |
| H | 1.45615600  | -5.22565400 | 0.31786900  |
| H | 5.25045200  | -4.30858500 | -1.47219300 |
| H | 3.71410700  | -5.94929900 | -0.42443300 |
| C | -4.82440200 | 5.60483400  | -0.16953200 |
| H | -4.62717500 | 6.67035400  | -0.01501700 |
| H | -5.30645900 | 5.49711200  | -1.14372800 |
| H | -5.52663600 | 5.28294100  | 0.60225500  |
| C | -0.70027800 | 3.78129400  | -2.43942600 |
| H | 0.21379400  | 4.37741100  | -2.37154700 |
| H | -0.39615900 | 2.73715900  | -2.56487700 |
| H | -1.25072000 | 4.09077100  | -3.32898200 |
| C | -1.44007700 | 2.97720100  | 2.49865900  |
| H | -1.52646200 | 1.88571100  | 2.50143300  |
| H | -0.39141700 | 3.22280000  | 2.68894800  |
| H | -2.04047600 | 3.36692600  | 3.32196600  |
| H | -0.76862300 | 0.05167400  | 0.37337800  |
| C | -1.71435900 | -1.53665800 | -0.69509300 |
| C | -2.18671900 | -2.82234200 | -0.70674700 |
| C | -2.18546200 | -3.58618000 | 0.49635200  |
| C | -1.68669800 | -2.93872200 | 1.66411100  |
| C | -1.23323800 | -1.64815600 | 1.58280300  |
| H | -1.69144900 | -0.92287900 | -1.58943000 |
| H | -2.55011200 | -3.23533100 | -1.63689600 |
| H | -1.65566200 | -3.44330400 | 2.61939700  |
| H | -0.83734600 | -1.12220100 | 2.44554100  |
| C | -2.59652100 | -5.60894900 | 1.77363600  |
| C | -3.12495800 | -5.48313700 | -0.69104000 |
| H | -3.21342700 | -5.12811900 | 2.53868500  |
| H | -2.99145500 | -6.60542400 | 1.59060000  |
| H | -1.57272100 | -5.70596400 | 2.14889200  |
| H | -3.98358600 | -4.93561600 | -1.09108700 |
| H | -2.34318000 | -5.53209200 | -1.45545800 |
| H | -3.44276400 | -6.49656600 | -0.45778700 |
| N | -2.62657900 | -4.85245300 | 0.52672600  |
| N | -1.24338700 | -0.95991500 | 0.42648600  |

### NHC

|   |            |            |            |
|---|------------|------------|------------|
| C | 1.89510100 | 0.45302400 | 0.54455900 |
| C | 2.53562300 | 1.83388800 | 0.41760800 |
| H | 1.98531800 | 0.09402600 | 1.57452400 |

|   |             |             |             |
|---|-------------|-------------|-------------|
| H | 2.17461800  | 2.49537000  | 1.21890800  |
| N | 0.47356500  | 0.61679400  | 0.24914300  |
| O | 2.23566700  | 2.39290700  | -0.85152600 |
| C | -0.01579000 | 1.66643500  | -0.48778300 |
| C | 0.87996300  | 2.78494100  | -0.93587900 |
| H | 0.67314300  | 3.04668500  | -1.97478500 |
| H | 0.69764800  | 3.67075400  | -0.30951500 |
| N | -1.29455800 | 1.54462000  | -0.66338500 |
| C | -0.52559800 | -0.26658800 | 0.56846500  |
| N | -1.57408800 | 0.35943300  | -0.00770100 |
| C | -2.92987300 | -0.09732400 | 0.02278800  |
| C | -3.28311200 | -1.22637100 | -0.71985200 |
| C | -3.85595900 | 0.60845000  | 0.79605400  |
| C | -4.61213600 | -1.64667700 | -0.67036800 |
| C | -5.17328400 | 0.15521200  | 0.81078400  |
| C | -5.56963600 | -0.96718300 | 0.08217200  |
| H | -4.90577500 | -2.52570700 | -1.23942800 |
| H | -5.90617400 | 0.68748400  | 1.41304000  |
| H | 3.62191300  | 1.75436900  | 0.48660100  |
| C | 2.50219800  | -0.57601600 | -0.42239400 |
| H | 1.89546500  | -1.48458200 | -0.35245500 |
| H | 2.40083000  | -0.18251100 | -1.43934900 |
| C | 3.94689500  | -0.87338300 | -0.11136500 |
| C | 4.28192600  | -1.77674400 | 0.90109500  |
| C | 4.97533900  | -0.22374500 | -0.79895400 |
| C | 5.61380700  | -2.02830300 | 1.21738300  |
| H | 3.48911700  | -2.29166800 | 1.43895600  |
| C | 6.30916600  | -0.47272700 | -0.48533500 |
| H | 4.72312800  | 0.48237300  | -1.58691500 |
| C | 6.63131200  | -1.37634000 | 0.52403000  |
| H | 5.85797600  | -2.73630700 | 2.00306600  |
| H | 7.09659300  | 0.03675500  | -1.03190300 |
| H | 7.67027300  | -1.57355800 | 0.76793400  |
| C | -7.00781900 | -1.41817900 | 0.08979800  |
| H | -7.46969100 | -1.25123500 | 1.06604800  |
| H | -7.59240100 | -0.86146600 | -0.65013100 |
| H | -7.09112100 | -2.47996500 | -0.15293400 |
| C | -2.25766200 | -1.96145000 | -1.54102000 |
| H | -1.75894300 | -1.28051700 | -2.23793800 |
| H | -1.48207300 | -2.38789200 | -0.89929000 |
| H | -2.72636100 | -2.76371100 | -2.11381500 |
| C | -3.42951800 | 1.81033600  | 1.59595200  |
| H | -2.54296000 | 1.57984900  | 2.19510800  |
| H | -3.16641000 | 2.64343000  | 0.93812600  |

|   |             |            |            |
|---|-------------|------------|------------|
| H | -4.22956100 | 2.13131100 | 2.26552200 |
|---|-------------|------------|------------|

**R1**

|   |             |             |             |
|---|-------------|-------------|-------------|
| C | -0.07762600 | 1.30779700  | -0.00004100 |
| C | 1.12770800  | 0.71705600  | -0.00026600 |
| H | -0.10017400 | 2.39904400  | 0.00016500  |
| C | -1.39223700 | 0.65992400  | -0.00004100 |
| C | -2.53942200 | 1.46362000  | 0.00022300  |
| C | -1.54565300 | -0.73415400 | -0.00030500 |
| C | -3.80812600 | 0.89418800  | 0.00022400  |
| H | -2.42935200 | 2.54474700  | 0.00043100  |
| C | -2.81157600 | -1.30264300 | -0.00030400 |
| H | -0.67090700 | -1.37643900 | -0.00050900 |
| C | -3.94667700 | -0.49068000 | -0.00004000 |
| H | -4.68686000 | 1.53049900  | 0.00042400  |
| H | -2.91710000 | -2.38251600 | -0.00051200 |
| H | -4.93505200 | -0.93876600 | -0.00004200 |
| C | 2.33965200  | 1.54450800  | -0.00023200 |
| O | 3.46865400  | 1.10256800  | -0.00042600 |
| H | 2.15561700  | 2.64007600  | -0.00001000 |
| H | 1.27020500  | -0.35962100 | -0.00048000 |

**Pre-R2**

|   |             |             |             |
|---|-------------|-------------|-------------|
| C | -4.15915800 | -0.50439200 | 0.16847300  |
| C | -4.18874000 | -1.62538800 | 1.00039500  |
| H | -4.55591700 | -2.60118000 | 0.71915300  |
| C | -3.65580400 | -1.25111100 | 2.23938800  |
| H | -3.52756400 | -1.87405500 | 3.11111900  |
| C | -3.31727000 | 0.08891200  | 2.14171400  |
| H | -2.88918100 | 0.76236000  | 2.87215200  |
| N | -3.61556100 | 0.53972900  | 0.90003300  |
| C | -4.60006400 | -0.39805300 | -1.20123100 |
| O | -4.50097500 | 0.57001300  | -1.93485000 |
| C | -5.25131200 | -1.67635300 | -1.78262600 |
| F | -5.65834800 | -1.46932400 | -3.02701800 |
| F | -6.30580700 | -2.05720900 | -1.04998900 |
| F | -4.37536100 | -2.69152300 | -1.78964000 |
| C | -3.40823300 | 1.93204900  | 0.50319600  |
| H | -3.68972800 | 2.04348500  | -0.54243200 |
| H | -4.02903100 | 2.58313000  | 1.12133500  |
| C | -1.94775100 | 2.31846300  | 0.75503800  |
| O | -1.69188100 | 3.11484600  | 1.63531400  |
| C | -0.88014000 | 1.66361900  | -0.05261200 |
| C | 0.44624400  | 1.82453700  | 0.36181400  |

|   |             |             |             |
|---|-------------|-------------|-------------|
| C | -1.16655800 | 0.91955300  | -1.20108100 |
| C | 1.47697600  | 1.23938200  | -0.36020100 |
| H | 0.64506000  | 2.41135200  | 1.25251500  |
| C | -0.12974400 | 0.34058900  | -1.92648900 |
| H | -2.18901100 | 0.80582100  | -1.54871100 |
| C | 1.18839000  | 0.49610200  | -1.50526600 |
| H | 2.50486700  | 1.36065100  | -0.03489200 |
| H | -0.35271200 | -0.23089900 | -2.82112000 |
| H | 1.99408300  | 0.03832900  | -2.07045200 |

**TSII**

|   |             |             |             |
|---|-------------|-------------|-------------|
| C | 2.97558200  | 2.61611800  | -0.11723800 |
| C | 1.82219000  | 3.33425200  | -0.46921600 |
| H | 1.69329700  | 4.40158200  | -0.36420600 |
| C | 0.89322400  | 2.41578000  | -0.95809800 |
| H | -0.10595000 | 2.61509300  | -1.31591700 |
| C | 1.49501000  | 1.16007600  | -0.88697100 |
| H | 1.10585100  | 0.18326500  | -1.14043900 |
| N | 2.73553600  | 1.27751800  | -0.38102500 |
| C | 4.18911100  | 3.12416100  | 0.46091900  |
| O | 5.18707600  | 2.51175900  | 0.79957000  |
| C | 4.20395700  | 4.65918000  | 0.68144400  |
| F | 5.35634600  | 5.04804500  | 1.22042900  |
| F | 3.21684900  | 5.04867600  | 1.50596100  |
| F | 4.04312500  | 5.32982000  | -0.47086300 |
| C | 3.61299200  | 0.14717900  | -0.14808600 |
| H | 4.32064100  | 0.37294200  | 0.64608800  |
| H | 2.79717600  | -0.88263700 | 0.49030200  |
| C | 4.26130900  | -0.35165500 | -1.35106500 |
| O | 3.96099700  | -0.04227000 | -2.50312000 |
| C | 5.33990100  | -1.38613200 | -1.12439800 |
| C | 6.27642300  | -1.59368800 | -2.13889800 |
| C | 5.41372900  | -2.15134600 | 0.04424900  |
| C | 7.28950200  | -2.53351500 | -1.98248500 |
| H | 6.18633000  | -1.00320300 | -3.04515500 |
| C | 6.42100500  | -3.10090800 | 0.19485100  |
| H | 4.66274800  | -2.03035800 | 0.82032600  |
| C | 7.36384400  | -3.28922900 | -0.81331100 |
| H | 8.02036100  | -2.68157300 | -2.77196800 |
| H | 6.46396900  | -3.70031700 | 1.09906200  |
| H | 8.14958600  | -4.02885900 | -0.69141700 |
| H | -7.70372100 | -0.20040200 | -1.05416500 |
| C | -5.50337600 | -1.19968200 | -0.63502700 |
| C | -4.17507100 | -1.51489900 | -0.34017500 |

|   |             |             |             |
|---|-------------|-------------|-------------|
| C | -3.25816900 | -0.56089300 | 0.09947200  |
| C | -3.70354100 | 0.75543500  | 0.24244700  |
| C | -5.01572800 | 1.14117000  | -0.02614500 |
| C | -5.90527600 | 0.14082600  | -0.46673200 |
| H | -3.83385800 | -2.53961000 | -0.42588400 |
| H | -2.97952300 | 1.49824700  | 0.55657500  |
| C | -1.85583600 | -0.92185800 | 0.41531200  |
| C | -1.20110000 | -0.34271900 | 1.50479300  |
| C | -1.16041500 | -1.87091500 | -0.33392400 |
| C | 0.12637300  | -0.62412300 | 1.81689800  |
| H | -1.77293800 | 0.32859400  | 2.13623400  |
| C | 0.17226100  | -2.19611600 | -0.07726600 |
| H | -1.67912100 | -2.34530700 | -1.16024400 |
| C | 0.85559500  | -1.49430800 | 0.95647400  |
| O | -7.19508100 | 0.54244200  | -0.72059900 |
| O | 2.17702000  | -1.65529900 | 1.12313700  |
| C | -5.46810200 | 2.60025400  | 0.14274800  |
| C | -5.96087700 | 3.17043900  | -1.20034300 |
| C | -6.58424800 | 2.69247000  | 1.19986900  |
| C | -4.31604600 | 3.49485600  | 0.62055900  |
| H | -5.16106500 | 3.12632100  | -1.94664400 |
| H | -6.82223500 | 2.62086800  | -1.58003000 |
| H | -6.24634900 | 4.22062800  | -1.07131700 |
| H | -6.22409200 | 2.31783900  | 2.16349200  |
| H | -6.88091400 | 3.73922300  | 1.33223600  |
| H | -7.46320500 | 2.11694200  | 0.90971000  |
| H | -4.68510400 | 4.51878500  | 0.73361200  |
| H | -3.92404100 | 3.17075100  | 1.58962800  |
| H | -3.48979700 | 3.51394000  | -0.09698500 |
| C | -6.48554800 | -2.28623600 | -1.11034700 |
| C | -7.64866800 | -2.45025600 | -0.10703000 |
| C | -6.99863200 | -1.97270400 | -2.53333400 |
| C | -5.81121200 | -3.66269600 | -1.20251500 |
| H | -7.25508900 | -2.79427300 | 0.85367600  |
| H | -8.20954100 | -1.53438300 | 0.09650500  |
| H | -8.35657200 | -3.20012900 | -0.47528100 |
| H | -6.15771100 | -1.97287800 | -3.23254600 |
| H | -7.70993800 | -2.74179600 | -2.85172600 |
| H | -7.49157300 | -1.00270700 | -2.64397000 |
| H | -6.54535200 | -4.39741900 | -1.54733200 |
| H | -4.98004000 | -3.65889700 | -1.91350200 |
| H | -5.43557000 | -3.99379900 | -0.23043800 |
| C | 0.87245200  | -3.30777000 | -0.87606800 |
| C | 1.39150100  | -4.37681300 | 0.10253200  |

|   |             |             |             |
|---|-------------|-------------|-------------|
| C | -0.08725500 | -3.99949000 | -1.85358500 |
| C | 2.05165500  | -2.76145300 | -1.69384200 |
| H | 2.08309900  | -3.93067500 | 0.81869000  |
| H | 0.55875500  | -4.83266200 | 0.64928800  |
| H | 1.91242400  | -5.16804000 | -0.44949900 |
| H | -0.44340600 | -3.31342900 | -2.62935300 |
| H | 0.44137600  | -4.81779800 | -2.35291000 |
| H | -0.95729700 | -4.42361500 | -1.34106200 |
| H | 2.46112500  | -3.54989500 | -2.33691600 |
| H | 1.74712800  | -1.92729900 | -2.33530200 |
| H | 2.84383100  | -2.41703600 | -1.03333200 |
| C | 0.77175900  | -0.03459000 | 3.08069400  |
| C | 1.33551000  | -1.17275900 | 3.94978700  |
| C | 1.89422800  | 0.95107300  | 2.72065500  |
| C | -0.24633600 | 0.73168400  | 3.93719500  |
| H | 0.52794700  | -1.83435600 | 4.28222500  |
| H | 2.06305900  | -1.75955100 | 3.38885700  |
| H | 1.82188000  | -0.75560500 | 4.83970700  |
| H | 1.52271700  | 1.72072300  | 2.03473500  |
| H | 2.26224200  | 1.44501200  | 3.62844100  |
| H | 2.72884900  | 0.43543400  | 2.24696000  |
| H | 0.24553400  | 1.07123700  | 4.85440100  |
| H | -0.63009300 | 1.61765500  | 3.42052500  |
| H | -1.09514300 | 0.10215400  | 4.22367200  |

## II

|   |             |             |             |
|---|-------------|-------------|-------------|
| C | 1.44992000  | 2.24580800  | 0.03176100  |
| C | 0.13039400  | 2.59334700  | -0.33246400 |
| H | -0.40015400 | 3.46990900  | 0.00980400  |
| C | -0.32678400 | 1.61904700  | -1.20736000 |
| H | -1.29702000 | 1.55996900  | -1.68005500 |
| C | 0.70030700  | 0.68211800  | -1.36170300 |
| H | 0.75664400  | -0.21745100 | -1.95114100 |
| N | 1.76846900  | 1.05415600  | -0.62649600 |
| C | 2.35786600  | 3.00212200  | 0.83238700  |
| O | 3.51663100  | 2.74743800  | 1.13650500  |
| C | 1.77623100  | 4.32596300  | 1.39278600  |
| F | 2.67522200  | 4.95791900  | 2.14379700  |
| F | 0.69080200  | 4.10921500  | 2.15975100  |
| F | 1.40188200  | 5.16752700  | 0.41478300  |
| C | 2.99026200  | 0.33526300  | -0.53527900 |
| H | 3.66474400  | 0.71075600  | 0.21351400  |
| H | 2.69158100  | -1.62819800 | 0.76214400  |
| C | 3.40191400  | -0.49568800 | -1.57444600 |



|   |             |             |             |
|---|-------------|-------------|-------------|
| O | 2.76742700  | -0.73592900 | -2.63943300 |
| C | 4.73602900  | -1.19782000 | -1.38836100 |
| C | 5.25201800  | -1.87758300 | -2.49502200 |
| C | 5.46060500  | -1.23505200 | -0.18991700 |
| C | 6.46273100  | -2.55837200 | -2.42008500 |
| H | 4.66474900  | -1.85605800 | -3.40634900 |
| C | 6.67142600  | -1.91683900 | -0.11131700 |
| H | 5.07626400  | -0.74157900 | 0.69846300  |
| C | 7.18059700  | -2.57975400 | -1.22648900 |
| H | 6.84649600  | -3.07764400 | -3.29399400 |
| H | 7.21625300  | -1.93629000 | 0.82807400  |
| H | 8.12405400  | -3.11370900 | -1.16167500 |
| H | -7.49068500 | 0.11862700  | -1.12517600 |
| C | -5.38477500 | -1.06439200 | -0.68480100 |
| C | -4.09489100 | -1.49042800 | -0.36081800 |
| C | -3.09088200 | -0.60634300 | 0.02874200  |
| C | -3.40048800 | 0.75429100  | 0.08870000  |
| C | -4.66392900 | 1.25093700  | -0.22399800 |
| C | -5.65070400 | 0.31756700  | -0.60083500 |
| H | -3.85867600 | -2.54744500 | -0.38304900 |
| H | -2.60352400 | 1.43601700  | 0.36076900  |
| C | -1.73301100 | -1.08765100 | 0.38458200  |
| C | -1.02695500 | -0.48583200 | 1.42779400  |
| C | -1.14977800 | -2.16343500 | -0.28396400 |
| C | 0.25747400  | -0.89325100 | 1.78551500  |
| H | -1.51671200 | 0.30664200  | 1.98116800  |
| C | 0.13870700  | -2.61249400 | 0.01727400  |
| H | -1.71122400 | -2.63581200 | -1.08194400 |
| C | 0.84638000  | -1.91361500 | 1.01301000  |
| O | -6.89361800 | 0.82958200  | -0.88044500 |
| O | 2.15621800  | -2.27245400 | 1.27025600  |
| C | -4.95850300 | 2.75837800  | -0.16775100 |
| C | -5.39615300 | 3.27190500  | -1.55200000 |
| C | -6.04989600 | 3.05008100  | 0.87821600  |
| C | -3.71112900 | 3.55834400  | 0.23471800  |
| H | -4.61009900 | 3.08342800  | -2.29036300 |
| H | -6.31444800 | 2.79238500  | -1.89052100 |
| H | -5.56448700 | 4.35370400  | -1.50610200 |
| H | -5.72695300 | 2.70905700  | 1.86713100  |
| H | -6.22893600 | 4.12971100  | 0.93363200  |
| H | -6.98862100 | 2.55525100  | 0.62879000  |
| H | -3.96450400 | 4.62255500  | 0.26215100  |
| H | -3.34337400 | 3.27540600  | 1.22610500  |
| H | -2.89718500 | 3.42665700  | -0.48603000 |

|   |             |             |             |
|---|-------------|-------------|-------------|
| C | -6.46825900 | -2.07637600 | -1.10025100 |
| C | -7.63269100 | -2.07988600 | -0.08549400 |
| C | -6.96522900 | -1.78902100 | -2.53444000 |
| C | -5.92470700 | -3.51258000 | -1.12470600 |
| H | -7.26313000 | -2.39603600 | 0.89408100  |
| H | -8.11446800 | -1.10938200 | 0.06262800  |
| H | -8.40477200 | -2.78708200 | -0.40597700 |
| H | -6.13482400 | -1.89498300 | -3.23803800 |
| H | -7.74250700 | -2.50943200 | -2.80979700 |
| H | -7.37607000 | -0.78744800 | -2.68767300 |
| H | -6.72515400 | -4.19230800 | -1.43251700 |
| H | -5.10057600 | -3.61994900 | -1.83578300 |
| H | -5.57619000 | -3.83003400 | -0.13799100 |
| C | 0.72212300  | -3.87374600 | -0.64428800 |
| C | 0.95069600  | -4.93027200 | 0.45311800  |
| C | -0.25574300 | -4.46955700 | -1.66665500 |
| C | 2.04578800  | -3.60673600 | -1.38097500 |
| H | 1.66661200  | -4.56853400 | 1.19332200  |
| H | 0.00985400  | -5.17199800 | 0.95968500  |
| H | 1.34600900  | -5.85017100 | 0.00671700  |
| H | -0.44367300 | -3.77780900 | -2.49415100 |
| H | 0.18024400  | -5.38131500 | -2.08650800 |
| H | -1.21487000 | -4.73771000 | -1.21081800 |
| H | 2.34262300  | -4.51365900 | -1.92201900 |
| H | 1.95854900  | -2.78631800 | -2.09890500 |
| H | 2.84972000  | -3.35726900 | -0.68762000 |
| C | 0.91923600  | -0.37566000 | 3.07698500  |
| C | 0.90343600  | -1.53570900 | 4.08968100  |
| C | 2.37042800  | 0.10200000  | 2.90228700  |
| C | 0.13375200  | 0.80175900  | 3.67349700  |
| H | -0.12179800 | -1.86530900 | 4.28831600  |
| H | 1.47574500  | -2.38406800 | 3.70425100  |
| H | 1.35270100  | -1.21458800 | 5.03702900  |
| H | 2.45967300  | 0.80954800  | 2.07930700  |
| H | 2.69103900  | 0.61242300  | 3.81773600  |
| H | 3.05386900  | -0.72795300 | 2.72568000  |
| H | 0.63241100  | 1.13516000  | 4.58880500  |
| H | 0.09874900  | 1.64926000  | 2.97981500  |
| H | -0.89008400 | 0.52385000  | 3.94098600  |

**TSII'**

|   |             |             |             |
|---|-------------|-------------|-------------|
| C | -4.59364800 | 0.49649100  | -0.27765100 |
| C | -4.90392600 | -0.79491900 | 0.17597500  |
| H | -5.78268800 | -1.35867700 | -0.09961900 |

|   |             |             |             |
|---|-------------|-------------|-------------|
| C | -3.87596800 | -1.19295900 | 1.02517100  |
| H | -3.78922300 | -2.13067900 | 1.55316300  |
| C | -2.95131900 | -0.14800200 | 1.07512100  |
| H | -2.03135800 | -0.04488300 | 1.62650800  |
| N | -3.37603300 | 0.86410700  | 0.28956100  |
| C | -5.35191700 | 1.33589400  | -1.15592700 |
| O | -5.07524900 | 2.45786400  | -1.55876700 |
| C | -6.69906000 | 0.73369200  | -1.62788600 |
| F | -7.34011500 | 1.58505400  | -2.42214500 |
| F | -7.50167000 | 0.45777600  | -0.58750700 |
| F | -6.51637600 | -0.40928600 | -2.30494300 |
| C | -2.75016800 | 2.14474800  | 0.07873600  |
| H | -2.67553500 | 2.39799600  | -0.97171200 |
| H | -3.85698400 | 3.04364400  | 0.59760300  |
| C | -1.69727600 | 2.56394200  | 0.94895300  |
| O | -1.40223100 | 2.03777300  | 2.03595200  |
| C | -0.98088000 | 3.83411200  | 0.54926900  |
| C | 0.21760900  | 4.12690100  | 1.20338900  |
| C | -1.46742400 | 4.72633200  | -0.41235400 |
| C | 0.93285400  | 5.27746300  | 0.88930900  |
| H | 0.56839700  | 3.43186300  | 1.95880900  |
| C | -0.75537600 | 5.88139600  | -0.72210200 |
| H | -2.41301800 | 4.53357500  | -0.91101800 |
| C | 0.44818000  | 6.15704700  | -0.07655200 |
| H | 1.86812100  | 5.48998300  | 1.39782400  |
| H | -1.14358700 | 6.57031700  | -1.46568400 |
| H | 1.00325900  | 7.05686800  | -0.32261800 |
| C | -4.58129800 | 3.35502000  | 2.58702300  |
| C | -5.48078000 | 3.84993200  | 3.50037400  |
| C | -6.61570800 | 4.56994000  | 3.04446000  |
| C | -6.74966400 | 4.73141200  | 1.64017800  |
| C | -5.80108600 | 4.19929100  | 0.79908000  |
| H | -3.69564400 | 2.79767300  | 2.88098400  |
| H | -5.30585400 | 3.67536100  | 4.55265900  |
| H | -7.58770600 | 5.26168500  | 1.20958600  |
| H | -5.87370000 | 4.28061700  | -0.28026300 |
| C | -8.68938800 | 5.78754000  | 3.40119200  |
| C | -7.35501500 | 4.88399400  | 5.33795900  |
| H | -9.29928000 | 5.14543400  | 2.75669300  |
| H | -9.30058800 | 6.10634100  | 4.24319900  |
| H | -8.39439200 | 6.67663700  | 2.83386600  |
| H | -7.36496000 | 3.82071300  | 5.60115600  |
| H | -6.41341800 | 5.32257200  | 5.68490500  |
| H | -8.17349900 | 5.37522300  | 5.86052800  |

|   |             |            |            |
|---|-------------|------------|------------|
| N | -7.52609300 | 5.07490200 | 3.90587800 |
| N | -4.73829100 | 3.52721300 | 1.26418300 |

**H'**

|   |             |             |             |
|---|-------------|-------------|-------------|
| C | -0.22119200 | -1.96389600 | -0.82468800 |
| C | -0.77043600 | -3.05147500 | -0.11703200 |
| H | -1.72036800 | -3.51853900 | -0.32970100 |
| C | 0.12763200  | -3.38703500 | 0.88681200  |
| H | 0.02560800  | -4.17492200 | 1.61804800  |
| C | 1.21791900  | -2.51518800 | 0.78211800  |
| H | 2.11617900  | -2.42153000 | 1.37082900  |
| N | 1.01728900  | -1.66761500 | -0.24800300 |
| C | -0.83944600 | -1.14109200 | -1.80999100 |
| O | -0.39993200 | -0.11820300 | -2.33109900 |
| C | -2.29760400 | -1.51842500 | -2.16098900 |
| F | -2.75568200 | -0.75827000 | -3.15127600 |
| F | -3.09456800 | -1.32117200 | -1.09487800 |
| F | -2.42806700 | -2.79987500 | -2.52748100 |
| C | 1.88686200  | -0.61919000 | -0.65653000 |
| H | 1.91302000  | -0.44304600 | -1.71813600 |
| H | 0.34222200  | 0.72683100  | -0.27804600 |
| C | 2.75566300  | -0.01592600 | 0.24596300  |
| O | 2.84453100  | -0.28092400 | 1.48230100  |
| C | 3.63891700  | 1.08138600  | -0.30229800 |
| C | 4.78045600  | 1.41759000  | 0.42932100  |
| C | 3.35696400  | 1.79199400  | -1.47443300 |
| C | 5.63735100  | 2.42145100  | -0.01096200 |
| H | 4.97077400  | 0.87384300  | 1.34855100  |
| C | 4.21073800  | 2.79886700  | -1.91419800 |
| H | 2.45343500  | 1.57518100  | -2.03776500 |
| C | 5.35680200  | 3.11436300  | -1.18657200 |
| H | 6.52518300  | 2.66647500  | 0.56436400  |
| H | 3.97622400  | 3.34509200  | -2.82279500 |
| H | 6.02203000  | 3.90032400  | -1.53057500 |
| C | -0.12988200 | 0.74255100  | 1.70735800  |
| C | -1.07152700 | 1.01256600  | 2.66518600  |
| C | -2.33991500 | 1.53781100  | 2.29360400  |
| C | -2.56895200 | 1.75416500  | 0.90482000  |
| C | -1.58562200 | 1.46126400  | -0.00001300 |
| H | 0.85751000  | 0.33011700  | 1.91916700  |
| H | -0.82633800 | 0.80753400  | 3.69737400  |
| H | -3.51054400 | 2.13738700  | 0.53847400  |
| H | -1.70885000 | 1.57990600  | -1.07023400 |
| C | -4.58065100 | 2.33009800  | 2.79396600  |

|   |             |            |            |
|---|-------------|------------|------------|
| C | -3.01867900 | 1.57430300 | 4.62382100 |
| H | -5.08660700 | 1.62941600 | 2.12208000 |
| H | -5.20348600 | 2.47133000 | 3.67467100 |
| H | -4.47472200 | 3.29496200 | 2.28773200 |
| H | -2.82531300 | 0.51398600 | 4.81553200 |
| H | -2.15821500 | 2.15911700 | 4.96346700 |
| H | -3.88920400 | 1.87591600 | 5.20219800 |
| N | -3.28416400 | 1.81198100 | 3.21072000 |
| N | -0.39562500 | 0.97958600 | 0.40521900 |

**R2**

|   |             |             |             |
|---|-------------|-------------|-------------|
| C | -5.41731700 | -4.24176800 | -1.19634600 |
| C | -5.91300700 | -5.55363100 | -1.36708600 |
| H | -6.95594300 | -5.81803200 | -1.45640800 |
| C | -4.82160500 | -6.40608200 | -1.39435500 |
| H | -4.83431100 | -7.48001900 | -1.51227300 |
| C | -3.66784900 | -5.62365800 | -1.24031700 |
| H | -2.61963100 | -5.87340600 | -1.20575400 |
| N | -4.02222100 | -4.32371500 | -1.11922800 |
| C | -6.16372200 | -3.02850700 | -1.12561000 |
| O | -5.77006300 | -1.87793900 | -0.97316500 |
| C | -7.69809200 | -3.21092000 | -1.26348400 |
| F | -8.32199800 | -2.03519500 | -1.21000000 |
| F | -8.20002100 | -3.98013000 | -0.28132000 |
| F | -8.03646300 | -3.79155900 | -2.42799100 |
| C | -3.15095300 | -3.22813100 | -0.94843000 |
| H | -3.65310500 | -2.29137300 | -0.80076200 |
| C | -1.77461200 | -3.37417600 | -0.91085900 |
| O | -1.11033000 | -4.45120700 | -0.98660800 |
| C | -0.99053600 | -2.09041500 | -0.72434900 |
| C | -1.48785700 | -0.81231200 | -1.00659400 |
| C | 0.32309000  | -2.20255500 | -0.25954700 |
| C | -0.70323700 | 0.31847000  | -0.80122000 |
| H | -2.48888100 | -0.70137500 | -1.41195800 |
| C | 1.10944500  | -1.07403500 | -0.05071400 |
| H | 0.69977500  | -3.20319100 | -0.07506000 |
| C | 0.59830200  | 0.19453900  | -0.31729200 |
| H | -1.10691600 | 1.30125800  | -1.02851600 |
| H | 2.12531600  | -1.18252300 | 0.31978000  |
| H | 1.20963600  | 1.07809300  | -0.15789500 |

**DQ**

|   |            |            |             |
|---|------------|------------|-------------|
| C | 2.80643900 | 1.28430300 | -0.00086700 |
| C | 1.45915900 | 1.23616200 | -0.07539300 |

|   |             |             |             |
|---|-------------|-------------|-------------|
| C | 0.69362900  | 0.00068100  | -0.09206100 |
| C | 1.46162500  | -1.23336300 | -0.09415000 |
| C | 2.80900800  | -1.28001100 | -0.02084800 |
| C | 3.56820700  | 0.00216300  | 0.08365800  |
| H | 0.91797800  | 2.16918300  | -0.11896900 |
| H | 0.92287200  | -2.16640900 | -0.16121800 |
| C | -0.69358700 | -0.00055400 | -0.09196500 |
| C | -1.45911600 | -1.23603200 | -0.07495500 |
| C | -1.46157800 | 1.23349100  | -0.09416600 |
| C | -2.80638900 | -1.28415500 | -0.00030400 |
| H | -0.91793600 | -2.16906100 | -0.11835700 |
| C | -2.80895600 | 1.28015700  | -0.02076100 |
| H | -0.92282900 | 2.16652600  | -0.16140300 |
| C | -3.56815500 | -0.00199700 | 0.08398300  |
| O | 4.78571000  | 0.00229500  | 0.23129100  |
| O | -4.78565600 | -0.00210000 | 0.23162700  |
| C | 3.58788600  | -2.59500100 | -0.02768200 |
| C | 4.58207900  | -2.60867200 | -1.20471200 |
| C | 4.34695700  | -2.76184900 | 1.30262500  |
| C | 2.65492400  | -3.80074100 | -0.19002200 |
| H | 4.05346200  | -2.49246100 | -2.15645700 |
| H | 5.32037300  | -1.81280100 | -1.11116400 |
| H | 5.10627100  | -3.56982400 | -1.22447200 |
| H | 3.64834400  | -2.76075700 | 2.14553000  |
| H | 4.87343800  | -3.72212900 | 1.30056100  |
| H | 5.07600000  | -1.96527400 | 1.44688800  |
| H | 3.25443500  | -4.71503800 | -0.20518400 |
| H | 1.94614600  | -3.88403700 | 0.64068500  |
| H | 2.09153700  | -3.75580600 | -1.12802100 |
| C | 3.58273700  | 2.60076600  | 0.01530900  |
| C | 4.33998000  | 2.74730200  | 1.34898700  |
| C | 4.57834600  | 2.63538200  | -1.16019300 |
| C | 2.64750500  | 3.80718400  | -0.12843900 |
| H | 3.64062000  | 2.72934000  | 2.19108300  |
| H | 5.07158300  | 1.95082700  | 1.48027200  |
| H | 4.86324900  | 3.70922200  | 1.36414100  |
| H | 4.05091800  | 2.53438200  | -2.11433700 |
| H | 5.10139400  | 3.59734900  | -1.16316400 |
| H | 5.31729400  | 1.83872400  | -1.07878600 |
| H | 3.24544500  | 4.72261900  | -0.13077500 |
| H | 2.08310000  | 3.77499100  | -1.06635100 |
| H | 1.93965100  | 3.87695900  | 0.70426600  |
| C | -3.58782200 | 2.59515400  | -0.02772300 |
| C | -4.34683800 | 2.76217000  | 1.30259200  |

|   |             |             |             |
|---|-------------|-------------|-------------|
| C | -2.65485500 | 3.80086700  | -0.19024300 |
| C | -4.58205700 | 2.60869600  | -1.20471900 |
| H | -5.07587000 | 1.96560900  | 1.44699800  |
| H | -3.64819200 | 2.76121800  | 2.14546200  |
| H | -4.87333500 | 3.72244300  | 1.30041700  |
| H | -2.09150300 | 3.75580900  | -1.12825800 |
| H | -3.25436100 | 4.71515800  | -0.20552000 |
| H | -1.94604500 | 3.88426300  | 0.64042600  |
| H | -5.10622500 | 3.56985800  | -1.22458900 |
| H | -4.05347900 | 2.49232600  | -2.15646700 |
| H | -5.32036500 | 1.81284900  | -1.11103200 |
| C | -3.58268800 | -2.60061400 | 0.01624200  |
| C | -4.33985800 | -2.74681300 | 1.34999800  |
| C | -4.57836100 | -2.63552500 | -1.15919800 |
| C | -2.64746300 | -3.80706900 | -0.12725400 |
| H | -3.64045400 | -2.72860900 | 2.19205200  |
| H | -5.07147200 | -1.95031900 | 1.48111000  |
| H | -4.86310400 | -3.70874100 | 1.36543900  |
| H | -4.05098500 | -2.53477000 | -2.11339600 |
| H | -5.10141500 | -3.59749100 | -1.16189100 |
| H | -5.31730300 | -1.83884500 | -1.07793900 |
| H | -3.24540300 | -4.72250500 | -0.12931300 |
| H | -2.08311100 | -3.77511800 | -1.06520500 |
| H | -1.93956000 | -3.87662500 | 0.70542500  |

#### DQH<sup>-</sup>

|   |             |             |             |
|---|-------------|-------------|-------------|
| H | -5.27768000 | 0.77015100  | -0.13187900 |
| C | -2.86065600 | 1.16271100  | -0.33469400 |
| C | -1.46509900 | 1.13017600  | -0.37431400 |
| C | -0.71898900 | -0.01250000 | -0.06819300 |
| C | -1.43938600 | -1.16722800 | 0.26415900  |
| C | -2.83203600 | -1.21443200 | 0.30085000  |
| C | -3.53182100 | -0.02773100 | 0.00709000  |
| H | -0.92030800 | 2.01842300  | -0.66819300 |
| H | -0.87263900 | -2.05035300 | 0.53176100  |
| C | 0.75661400  | 0.00241200  | -0.07308200 |
| C | 1.50545000  | -1.14648700 | -0.36918300 |
| C | 1.47591100  | 1.16270300  | 0.25048600  |
| C | 2.89115800  | -1.17694200 | -0.34311400 |
| H | 0.96042900  | -2.04194800 | -0.65583200 |
| C | 2.86032200  | 1.21030700  | 0.29508500  |
| H | 0.90738600  | 2.05033600  | 0.51512600  |
| C | 3.63931900  | 0.01822400  | 0.00696800  |
| O | -4.90880800 | -0.09119200 | 0.07557500  |

|   |             |             |             |
|---|-------------|-------------|-------------|
| O | 4.91365100  | 0.02084300  | 0.06203400  |
| C | -3.57253800 | -2.50923800 | 0.67381800  |
| C | -4.39425700 | -2.30503200 | 1.95970500  |
| C | -4.49296000 | -2.94996400 | -0.47981300 |
| C | -2.59757600 | -3.66468000 | 0.93894000  |
| H | -3.73599600 | -2.01935400 | 2.78665900  |
| H | -5.15080700 | -1.53074700 | 1.83451700  |
| H | -4.89496100 | -3.24146500 | 2.23242500  |
| H | -3.90430300 | -3.12562100 | -1.38620500 |
| H | -4.99560000 | -3.88752800 | -0.21487400 |
| H | -5.25192200 | -2.19901800 | -0.69859800 |
| H | -3.17078200 | -4.56418500 | 1.18512400  |
| H | -1.98217300 | -3.88808200 | 0.06179500  |
| H | -1.93257800 | -3.45090100 | 1.78118400  |
| C | -3.62543500 | 2.45958900  | -0.65971000 |
| C | -4.53263100 | 2.27182700  | -1.89486000 |
| C | -4.42973300 | 2.93757000  | 0.56957600  |
| C | -2.67256200 | 3.61217200  | -1.01089600 |
| H | -3.91676900 | 2.02964600  | -2.76554600 |
| H | -5.27134000 | 1.47066900  | -1.80473100 |
| H | -5.07533100 | 3.19958900  | -2.10527500 |
| H | -3.74127000 | 3.16770500  | 1.38775500  |
| H | -4.98695600 | 3.84766800  | 0.32300300  |
| H | -5.14380800 | 2.20801200  | 0.96170500  |
| H | -3.26057000 | 4.51058700  | -1.22378200 |
| H | -1.99449100 | 3.84107000  | -0.18394800 |
| H | -2.07319600 | 3.38399400  | -1.89653500 |
| C | 3.59991100  | 2.49700300  | 0.67964200  |
| C | 4.54981200  | 2.91549200  | -0.45745600 |
| C | 2.64642400  | 3.66975600  | 0.93789800  |
| C | 4.41173300  | 2.26499800  | 1.96664900  |
| H | 5.24723600  | 2.10546900  | -0.67128000 |
| H | 3.97641200  | 3.14106900  | -1.36378900 |
| H | 5.10905200  | 3.81732400  | -0.17545600 |
| H | 1.96691200  | 3.46553100  | 1.77252400  |
| H | 3.22903100  | 4.56256500  | 1.19198000  |
| H | 2.04170800  | 3.90382400  | 0.05449000  |
| H | 4.98102600  | 3.16608400  | 2.23003000  |
| H | 3.73842800  | 2.03248500  | 2.79963200  |
| H | 5.09807100  | 1.43023400  | 1.82268500  |
| C | 3.66644900  | -2.45889800 | -0.66912100 |
| C | 4.60844600  | -2.21760200 | -1.86230700 |
| C | 4.49641400  | -2.88531400 | 0.55590600  |
| C | 2.74366400  | -3.62843000 | -1.03349700 |



|   |            |             |             |
|---|------------|-------------|-------------|
| H | 4.02900300 | -1.95459400 | -2.75460400 |
| H | 5.29230300 | -1.40056200 | -1.63051700 |
| H | 5.18367300 | -3.12583400 | -2.08504100 |
| H | 3.83447600 | -3.11795800 | 1.39790600  |
| H | 5.08379500 | -3.78388800 | 0.32528400  |
| H | 5.16685100 | -2.07511700 | 0.84422100  |
| H | 3.34986700 | -4.51457300 | -1.25356100 |
| H | 2.06579800 | -3.88252800 | -0.21098900 |
| H | 2.13758500 | -3.40815100 | -1.91921700 |

**CO<sub>2</sub>**

|   |             |            |             |
|---|-------------|------------|-------------|
| C | 0.00548500  | 0.00000000 | 0.00004700  |
| O | -0.00204100 | 0.00000000 | 1.21926100  |
| O | 0.01924500  | 0.00000000 | -1.21911000 |

**re-TS1**

|   |             |             |             |
|---|-------------|-------------|-------------|
| C | -3.04701300 | -0.90569500 | 0.11969200  |
| C | -3.92654600 | -2.15417700 | 0.14929500  |
| H | -2.95711000 | -0.46613200 | 1.11769500  |
| H | -3.70557800 | -2.76299700 | 1.03741800  |
| N | -1.69717600 | -1.35151300 | -0.24062800 |
| O | -3.73202700 | -2.92238400 | -1.02962100 |
| C | -1.38950300 | -2.58910900 | -0.73819000 |
| C | -2.48232300 | -3.57900600 | -1.02125700 |
| H | -2.33824400 | -4.03494900 | -2.00203900 |
| H | -2.46246300 | -4.37189200 | -0.25943400 |
| N | -0.10306100 | -2.72987900 | -0.86546700 |
| C | -0.55643100 | -0.64778700 | -0.05689300 |
| N | 0.38765700  | -1.51406100 | -0.43589500 |
| C | 1.80539900  | -1.35301500 | -0.26502700 |
| C | 2.57304900  | -0.84787700 | -1.31089400 |
| C | 2.34398300  | -1.69394500 | 0.97872800  |
| C | 3.94596400  | -0.71805800 | -1.09967600 |
| C | 3.71762600  | -1.53932700 | 1.14666100  |
| C | 4.53319400  | -1.06549300 | 0.11521500  |
| H | 4.56504600  | -0.31060800 | -1.89515100 |
| H | 4.16300900  | -1.79145800 | 2.10649500  |
| H | -4.97804100 | -1.85945700 | 0.17409800  |
| C | -3.55745500 | 0.14645700  | -0.87255300 |
| H | -2.72146300 | 0.80141400  | -1.14166300 |
| H | -3.88660600 | -0.35688100 | -1.78848800 |
| C | -4.67107300 | 0.96594400  | -0.26582900 |
| C | -4.42152600 | 1.71100800  | 0.89391600  |
| C | -5.94677800 | 0.99220800  | -0.82852500 |

|   |             |             |             |
|---|-------------|-------------|-------------|
| C | -5.43306800 | 2.47351900  | 1.46778300  |
| H | -3.43397900 | 1.67469400  | 1.35662700  |
| C | -6.95996200 | 1.75775900  | -0.25313600 |
| H | -6.14745200 | 0.41258700  | -1.72609900 |
| C | -6.70428300 | 2.50062000  | 0.89511200  |
| H | -5.22879800 | 3.04724100  | 2.36629400  |
| H | -7.94812000 | 1.77090600  | -0.70238700 |
| H | -7.49206400 | 3.09627300  | 1.34532500  |
| C | 6.02108000  | -0.94224500 | 0.31591500  |
| H | 6.25244300  | -0.59367000 | 1.32603100  |
| H | 6.51205300  | -1.91161600 | 0.17965400  |
| H | 6.45448900  | -0.23641600 | -0.39588000 |
| C | 1.92057000  | -0.40737400 | -2.59169000 |
| H | 1.30192900  | -1.20260600 | -3.01778600 |
| H | 1.26615100  | 0.45224700  | -2.40327900 |
| H | 2.67038900  | -0.11201600 | -3.32787600 |
| C | 1.44786700  | -2.17069400 | 2.09213900  |
| H | 0.70333800  | -1.40858600 | 2.35578000  |
| H | 0.89908700  | -3.06966800 | 1.79343200  |
| H | 2.03169600  | -2.40465700 | 2.98390300  |
| C | 1.41226800  | 2.05915700  | 0.11502300  |
| C | 0.83127200  | 1.32602600  | 1.06727200  |
| H | 0.78177000  | 2.44432600  | -0.68976400 |
| C | 2.85295100  | 2.31570400  | -0.02526500 |
| C | 3.35670300  | 2.69439500  | -1.27530100 |
| C | 3.75431400  | 2.13784800  | 1.03289200  |
| C | 4.72404500  | 2.85642400  | -1.47718200 |
| H | 2.66435000  | 2.84482200  | -2.10027800 |
| C | 5.11837000  | 2.30781500  | 0.83523900  |
| H | 3.38214100  | 1.86878500  | 2.01679000  |
| C | 5.61084800  | 2.65758500  | -0.42244300 |
| H | 5.09599000  | 3.14174400  | -2.45638500 |
| H | 5.80453500  | 2.16846200  | 1.66527400  |
| H | 6.67806400  | 2.78743200  | -0.57338000 |
| C | -0.63462200 | 1.00373500  | 1.03852400  |
| O | -1.25282900 | 0.70073900  | 2.08745300  |
| H | -1.15000600 | 1.58458100  | 0.24010400  |
| H | 1.39695900  | 0.88124700  | 1.88441900  |

**si-TS1**

|   |             |             |             |
|---|-------------|-------------|-------------|
| C | -2.85123500 | -1.24091200 | 0.27087500  |
| C | -3.71856100 | -2.45071100 | -0.06549200 |
| H | -2.89922500 | -0.99375000 | 1.33294000  |
| H | -3.55349200 | -3.25970500 | 0.66089200  |

|   |             |             |             |
|---|-------------|-------------|-------------|
| N | -1.46088400 | -1.62718300 | -0.02556500 |
| O | -3.44043400 | -2.91141300 | -1.38059700 |
| C | -1.12379700 | -2.65400700 | -0.87099400 |
| C | -2.18307800 | -3.54600600 | -1.44998200 |
| H | -1.96730100 | -3.75536700 | -2.49875900 |
| H | -2.19638900 | -4.49757300 | -0.89800400 |
| N | 0.16527300  | -2.72881800 | -1.02408900 |
| C | -0.33073200 | -0.99780600 | 0.37215000  |
| N | 0.62885400  | -1.69724900 | -0.24040300 |
| C | 2.03151200  | -1.40154800 | -0.18262300 |
| C | 2.56159000  | -0.54593600 | -1.14869500 |
| C | 2.78873900  | -1.92713900 | 0.86534700  |
| C | 3.90813400  | -0.20488600 | -1.03913200 |
| C | 4.12879500  | -1.55185900 | 0.93921100  |
| C | 4.70009600  | -0.68660800 | 0.00186900  |
| H | 4.33346800  | 0.49315400  | -1.75656300 |
| H | 4.73970900  | -1.93734800 | 1.75253600  |
| H | -4.77136600 | -2.16313800 | -0.04191900 |
| C | -3.21755700 | 0.00185500  | -0.55227600 |
| H | -2.42780100 | 0.74002200  | -0.38441500 |
| H | -3.23356000 | -0.27166500 | -1.61316100 |
| C | -4.54373100 | 0.57259700  | -0.11616200 |
| C | -4.61424400 | 1.29857900  | 1.07832000  |
| C | -5.70863500 | 0.36148800  | -0.85563700 |
| C | -5.83343700 | 1.80438000  | 1.51828200  |
| H | -3.69748300 | 1.45618100  | 1.64332100  |
| C | -6.92940900 | 0.86954600  | -0.41422400 |
| H | -5.65707700 | -0.20255100 | -1.78440900 |
| C | -6.99332100 | 1.59142700  | 0.77436300  |
| H | -5.87901700 | 2.37035900  | 2.44367100  |
| H | -7.82839200 | 0.70141100  | -0.99920000 |
| H | -7.94280600 | 1.98840400  | 1.11968100  |
| C | 6.13869800  | -0.25977500 | 0.13712000  |
| H | 6.30200400  | 0.24873200  | 1.09278000  |
| H | 6.81148200  | -1.12192700 | 0.10554800  |
| H | 6.42173300  | 0.42828300  | -0.66213600 |
| C | 1.68019000  | 0.03893500  | -2.21643000 |
| H | 1.20734500  | -0.74495200 | -2.81562600 |
| H | 0.87941400  | 0.62982000  | -1.75500200 |
| H | 2.25343300  | 0.69318900  | -2.87523900 |
| C | 2.15967700  | -2.84266200 | 1.88164300  |
| H | 1.39425500  | -2.31675800 | 2.46228800  |
| H | 1.67079200  | -3.69054300 | 1.39284800  |
| H | 2.91038200  | -3.22647600 | 2.57414600  |

|   |              |              |              |
|---|--------------|--------------|--------------|
| C | 1. 76986500  | 1. 60960600  | 1. 09703700  |
| C | 0. 45083100  | 1. 48705600  | 0. 92331600  |
| H | 2. 24543400  | 0. 94833300  | 1. 82558000  |
| C | 2. 69499000  | 2. 50325200  | 0. 38358300  |
| C | 4. 02104800  | 2. 59258900  | 0. 82647800  |
| C | 2. 32710300  | 3. 22164100  | -0. 76174600 |
| C | 4. 95350500  | 3. 37220200  | 0. 15160500  |
| H | 4. 31960000  | 2. 02517200  | 1. 70477100  |
| C | 3. 25756100  | 4. 00237200  | -1. 43856900 |
| H | 1. 30964100  | 3. 15579300  | -1. 13613100 |
| C | 4. 57465500  | 4. 07969700  | -0. 98734500 |
| H | 5. 97665700  | 3. 42370400  | 0. 51142900  |
| H | 2. 95620100  | 4. 54933100  | -2. 32655000 |
| H | 5. 29950200  | 4. 68578200  | -1. 52118600 |
| C | -0. 35593400 | 0. 47425200  | 1. 69036700  |
| O | -1. 54897200 | 0. 71299600  | 1. 99318600  |
| H | 0. 29697900  | -0. 09155000 | 2. 39440500  |
| H | -0. 11689600 | 2. 12156400  | 0. 24352600  |

**re-M1**

|   |              |              |              |
|---|--------------|--------------|--------------|
| C | -3. 07829800 | -0. 87065800 | 0. 08822000  |
| C | -3. 95124900 | -2. 12188200 | 0. 11959500  |
| H | -2. 94778200 | -0. 43340000 | 1. 08385300  |
| H | -3. 72227100 | -2. 73711400 | 1. 00079200  |
| N | -1. 72881100 | -1. 32470700 | -0. 27866400 |
| O | -3. 76189800 | -2. 87891700 | -1. 06905200 |
| C | -1. 41813000 | -2. 56646900 | -0. 75295100 |
| C | -2. 51666400 | -3. 54010900 | -1. 07382600 |
| H | -2. 36796300 | -3. 96700800 | -2. 06704900 |
| H | -2. 49883300 | -4. 35459700 | -0. 33554400 |
| N | -0. 12922300 | -2. 73878700 | -0. 80795800 |
| C | -0. 57594500 | -0. 67279500 | -0. 03103100 |
| N | 0. 38005300  | -1. 54639900 | -0. 35444800 |
| C | 1. 79007700  | -1. 43589700 | -0. 08426300 |
| C | 2. 65612600  | -1. 06991100 | -1. 11167900 |
| C | 2. 20220600  | -1. 65728300 | 1. 23190300  |
| C | 4. 00373600  | -0. 92037000 | -0. 78792000 |
| C | 3. 55834500  | -1. 49311900 | 1. 50536100  |
| C | 4. 46789300  | -1. 12311900 | 0. 51108100  |
| H | 4. 69808200  | -0. 59902100 | -1. 56053600 |
| H | 3. 91081600  | -1. 64191000 | 2. 52326300  |
| H | -5. 00272900 | -1. 82880700 | 0. 15338800  |
| C | -3. 60497500 | 0. 18184800  | -0. 89578800 |
| H | -2. 76584900 | 0. 78476100  | -1. 25826400 |

|   |             |             |             |
|---|-------------|-------------|-------------|
| H | -4.04005100 | -0.32348600 | -1.76518800 |
| C | -4.61319600 | 1.08041800  | -0.21941000 |
| C | -4.23058700 | 1.80821900  | 0.91577300  |
| C | -5.91641000 | 1.19922800  | -0.70066200 |
| C | -5.14574000 | 2.64612300  | 1.54436700  |
| H | -3.22062800 | 1.69369300  | 1.31796400  |
| C | -6.83116600 | 2.03995700  | -0.06856000 |
| H | -6.21564100 | 0.63212700  | -1.57863900 |
| C | -6.44611700 | 2.76625500  | 1.05378400  |
| H | -4.84419000 | 3.20722400  | 2.42333300  |
| H | -7.84252700 | 2.12502000  | -0.45357400 |
| H | -7.15633100 | 3.42166700  | 1.54800900  |
| C | 5.92690800  | -0.94505400 | 0.84081000  |
| H | 6.05166900  | -0.47531500 | 1.82006700  |
| H | 6.44061100  | -1.91174200 | 0.86929100  |
| H | 6.42124200  | -0.31751600 | 0.09605900  |
| C | 2.12808700  | -0.77630600 | -2.48755600 |
| H | 1.57837900  | -1.63051800 | -2.89383800 |
| H | 1.43671300  | 0.07405900  | -2.45032300 |
| H | 2.94224000  | -0.52423400 | -3.16892500 |
| C | 1.19911100  | -1.99692300 | 2.30337500  |
| H | 0.46321900  | -1.18981200 | 2.43528200  |
| H | 0.64520800  | -2.90454300 | 2.03962400  |
| H | 1.70218700  | -2.16948300 | 3.25625200  |
| C | 1.41483900  | 1.94354800  | -0.27155500 |
| C | 0.86201600  | 1.23654000  | 0.71665400  |
| H | 0.79772200  | 2.21855600  | -1.12965100 |
| C | 2.84855400  | 2.26393800  | -0.38084200 |
| C | 3.39962100  | 2.49313800  | -1.64718300 |
| C | 3.70648300  | 2.25718000  | 0.72762200  |
| C | 4.77096000  | 2.66927100  | -1.81094200 |
| H | 2.74406900  | 2.51157200  | -2.51459100 |
| C | 5.07357200  | 2.44097900  | 0.56715900  |
| H | 3.29604600  | 2.10759200  | 1.72171000  |
| C | 5.61498300  | 2.63614600  | -0.70431000 |
| H | 5.17991400  | 2.83430500  | -2.80310600 |
| H | 5.72290200  | 2.43211200  | 1.43748400  |
| H | 6.68442300  | 2.77602100  | -0.82732800 |
| C | -0.56584100 | 0.71462300  | 0.69453600  |
| O | -1.15843100 | 0.54532700  | 1.87313000  |
| H | -1.11138800 | 1.36725700  | -0.04061400 |
| H | 1.44735700  | 0.92554000  | 1.58045000  |

**si-M1**

|   |             |             |             |
|---|-------------|-------------|-------------|
| C | -2.50043700 | -1.89437300 | 0.06290700  |
| C | -3.07765000 | -3.19426200 | -0.48590100 |
| H | -2.56907100 | -1.81913700 | 1.14800400  |
| H | -2.74339800 | -4.05683700 | 0.10839700  |
| N | -1.05382700 | -1.91447800 | -0.25255500 |
| O | -2.70904400 | -3.36871500 | -1.84833700 |
| C | -0.50295200 | -2.70566000 | -1.22640700 |
| C | -1.34632700 | -3.69880200 | -1.97331100 |
| H | -1.08763000 | -3.68485500 | -3.03313500 |
| H | -1.14853800 | -4.70551000 | -1.57644600 |
| N | 0.77670900  | -2.49647800 | -1.33964500 |
| C | -0.06727900 | -1.15661400 | 0.26307600  |
| N | 1.02873300  | -1.53306300 | -0.40188900 |
| C | 2.34641200  | -0.98515500 | -0.23839200 |
| C | 2.73969700  | 0.04191200  | -1.10149500 |
| C | 3.14032300  | -1.45332400 | 0.80699000  |
| C | 3.97202600  | 0.63900400  | -0.86168800 |
| C | 4.36720500  | -0.81768500 | 1.00992700  |
| C | 4.78956100  | 0.23338600  | 0.19667200  |
| H | 4.28669200  | 1.46640800  | -1.49311700 |
| H | 5.00197300  | -1.15155700 | 1.82680100  |
| H | -4.16782900 | -3.14292100 | -0.45149000 |
| C | -3.14333500 | -0.65200800 | -0.56624600 |
| H | -2.49170900 | 0.19527600  | -0.33840700 |
| H | -3.20242000 | -0.78711300 | -1.65208800 |
| C | -4.50368100 | -0.39838900 | 0.03398000  |
| C | -4.57663900 | 0.10452000  | 1.33867600  |
| C | -5.68023300 | -0.67663400 | -0.66199100 |
| C | -5.81630700 | 0.32953300  | 1.92809600  |
| H | -3.64185800 | 0.30879400  | 1.86093500  |
| C | -6.92161800 | -0.45075700 | -0.06814100 |
| H | -5.62345600 | -1.06564900 | -1.67630900 |
| C | -6.99072300 | 0.05345600  | 1.22708100  |
| H | -5.86935500 | 0.72450700  | 2.93808400  |
| H | -7.83194900 | -0.66704000 | -0.61870100 |
| H | -7.95646400 | 0.23135000  | 1.68998900  |
| C | 6.10538700  | 0.92631700  | 0.43611500  |
| H | 6.49057900  | 0.71723800  | 1.43623100  |
| H | 6.85580600  | 0.59765600  | -0.28985600 |
| H | 5.99393800  | 2.00916800  | 0.32538800  |
| C | 1.82818400  | 0.52151800  | -2.19612600 |
| H | 1.56142900  | -0.29243200 | -2.87640900 |
| H | 0.90065300  | 0.91674000  | -1.76520400 |
| H | 2.30322600  | 1.31927600  | -2.76904700 |

|   |              |              |              |
|---|--------------|--------------|--------------|
| C | 2. 68262800  | -2. 58792800 | 1. 68483100  |
| H | 1. 85381300  | -2. 28193900 | 2. 33213800  |
| H | 2. 33713600  | -3. 43288500 | 1. 08225300  |
| H | 3. 49882400  | -2. 93034400 | 2. 32272500  |
| C | 1. 37210200  | 1. 78611500  | 1. 04962500  |
| C | 0. 17168500  | 1. 23436400  | 0. 85330100  |
| H | 2. 08614000  | 1. 23948400  | 1. 67028700  |
| C | 1. 89337500  | 3. 03873200  | 0. 47881600  |
| C | 3. 17344700  | 3. 46880200  | 0. 85346200  |
| C | 1. 18593000  | 3. 80378000  | -0. 45828500 |
| C | 3. 72891600  | 4. 62667700  | 0. 31905200  |
| H | 3. 73630200  | 2. 87632000  | 1. 57147000  |
| C | 1. 73836500  | 4. 96166300  | -0. 99332900 |
| H | 0. 19593200  | 3. 48853500  | -0. 77442900 |
| C | 3. 01185400  | 5. 37903900  | -0. 60814800 |
| H | 4. 72091800  | 4. 94238400  | 0. 62770900  |
| H | 1. 17360100  | 5. 54115600  | -1. 71702000 |
| H | 3. 44060300  | 6. 28286900  | -1. 02873000 |
| C | -0. 24055900 | -0. 11655600 | 1. 44279200  |
| O | -1. 45090800 | -0. 17355000 | 1. 95370700  |
| H | 0. 61187800  | -0. 41606100 | 2. 11466400  |
| H | -0. 60526100 | 1. 73012700  | 0. 26991400  |

**M02**

|   |              |              |              |
|---|--------------|--------------|--------------|
| C | -2. 36788900 | -1. 78688500 | 1. 27177100  |
| C | -3. 18879900 | -3. 00195500 | 1. 70446200  |
| H | -2. 09595900 | -1. 18674800 | 2. 14017700  |
| H | -2. 75199700 | -3. 47009700 | 2. 59878300  |
| N | -1. 10481800 | -2. 31108600 | 0. 68440600  |
| O | -3. 28204000 | -3. 94695400 | 0. 65463900  |
| C | -0. 96383900 | -3. 60763600 | 0. 26228300  |
| C | -2. 05961300 | -4. 61356100 | 0. 46302300  |
| H | -2. 14376700 | -5. 24677200 | -0. 42099200 |
| H | -1. 81143200 | -5. 24513300 | 1. 32870900  |
| N | 0. 20319000  | -3. 80224100 | -0. 27641300 |
| C | 0. 04523300  | -1. 67101000 | 0. 37940200  |
| N | 0. 82070000  | -2. 59005200 | -0. 19610000 |
| C | 2. 12691400  | -2. 45722700 | -0. 79900700 |
| C | 2. 18022000  | -2. 08045000 | -2. 14285400 |
| C | 3. 25376100  | -2. 73932200 | -0. 02665600 |
| C | 3. 44439500  | -1. 95717600 | -2. 71567700 |
| C | 4. 49267000  | -2. 61199400 | -0. 65249100 |
| C | 4. 60787000  | -2. 22019500 | -1. 98776400 |
| H | 3. 52150600  | -1. 65427600 | -3. 75649500 |

|   |             |             |             |
|---|-------------|-------------|-------------|
| H | 5.39134500  | -2.81231000 | -0.07469200 |
| H | -4.20175900 | -2.67415800 | 1.94386100  |
| C | -3.09269700 | -0.90776800 | 0.24351800  |
| H | -2.39053600 | -0.16049600 | -0.14002600 |
| H | -3.41482800 | -1.53000500 | -0.59771600 |
| C | -4.27418800 | -0.21367200 | 0.87536600  |
| C | -4.06262200 | 0.84869700  | 1.75888200  |
| C | -5.57795600 | -0.63883100 | 0.61653000  |
| C | -5.14180600 | 1.47876000  | 2.37030700  |
| H | -3.04573200 | 1.18115200  | 1.95936900  |
| C | -6.65915100 | -0.00709400 | 1.22776900  |
| H | -5.74613500 | -1.46484600 | -0.07140600 |
| C | -6.44200900 | 1.05189600  | 2.10475100  |
| H | -4.96930300 | 2.30574300  | 3.05144600  |
| H | -7.66962600 | -0.34109100 | 1.01618000  |
| H | -7.28309400 | 1.54606400  | 2.57963700  |
| C | 5.96213700  | -2.10424800 | -2.63548600 |
| H | 5.94800200  | -1.38493700 | -3.45667800 |
| H | 6.71850500  | -1.79215500 | -1.91157100 |
| H | 6.27417600  | -3.07047400 | -3.04423500 |
| C | 0.92319600  | -1.79941900 | -2.92361300 |
| H | 0.23210200  | -2.64633200 | -2.87696600 |
| H | 0.39708400  | -0.91899200 | -2.53666600 |
| H | 1.15837200  | -1.60772600 | -3.97083700 |
| C | 3.13939800  | -3.10218000 | 1.42652700  |
| H | 2.89286600  | -2.21132000 | 2.01440400  |
| H | 2.35577300  | -3.84526100 | 1.60071600  |
| H | 4.08432500  | -3.50189300 | 1.79726500  |
| C | 2.40422000  | 0.76733400  | 1.57105400  |
| C | 1.76005600  | 0.18529500  | 0.55828100  |
| H | 1.83592800  | 1.00997100  | 2.46674300  |
| C | 3.82912600  | 1.13160500  | 1.59535200  |
| C | 4.31597800  | 1.88502400  | 2.66944100  |
| C | 4.72562500  | 0.72667100  | 0.59648500  |
| C | 5.66029600  | 2.23705300  | 2.74298300  |
| H | 3.62850900  | 2.20403100  | 3.44918800  |
| C | 6.06724800  | 1.07691400  | 0.67008600  |
| H | 4.37787500  | 0.12237500  | -0.23622900 |
| C | 6.53975800  | 1.83421400  | 1.74222000  |
| H | 6.01894900  | 2.82648600  | 3.58041400  |
| H | 6.74981200  | 0.75547200  | -0.11055500 |
| H | 7.58888900  | 2.10559300  | 1.79640600  |
| C | 0.29811600  | -0.18312900 | 0.64468000  |
| O | -0.31580800 | 0.16712400  | 1.84261000  |



|   |             |             |             |
|---|-------------|-------------|-------------|
| H | 0.11652900  | -0.37311800 | 2.57650000  |
| H | 2.25128200  | 0.00483600  | -0.39231700 |
| C | 0.36011100  | -2.76500900 | 3.68213000  |
| C | 0.95156300  | -3.79816100 | 4.37952400  |
| C | 2.16111700  | -3.55933000 | 5.07708900  |
| C | 2.66430700  | -2.23708400 | 5.00746000  |
| C | 1.98429900  | -1.28645800 | 4.27474300  |
| H | -0.57365300 | -2.95181300 | 3.15537400  |
| H | 0.47761600  | -4.77075600 | 4.38274500  |
| H | 3.57402700  | -1.95071600 | 5.51793300  |
| H | 2.38368800  | -0.27748700 | 4.21731800  |
| C | 4.04145700  | -4.23998200 | 6.45858300  |
| C | 2.22397500  | -5.86904900 | 5.83098000  |
| H | 3.89769200  | -3.48607100 | 7.24017900  |
| H | 4.41209000  | -5.15105600 | 6.92427500  |
| H | 4.80222500  | -3.87847700 | 5.75845300  |
| H | 1.22591900  | -5.85287100 | 6.28258200  |
| H | 2.15110800  | -6.31725200 | 4.83365600  |
| H | 2.86361600  | -6.50129300 | 6.44355900  |
| N | 2.79505800  | -4.53373800 | 5.76939500  |
| N | 0.84626300  | -1.51831000 | 3.59900900  |
| H | -0.23491500 | 0.34329200  | -0.16242700 |

## TS2

|   |             |             |             |
|---|-------------|-------------|-------------|
| C | -3.08545900 | -0.94722500 | 1.33776700  |
| C | -4.02243900 | -2.14478400 | 1.48711100  |
| H | -2.87709000 | -0.51702800 | 2.31491500  |
| H | -3.67597300 | -2.80905300 | 2.29142800  |
| N | -1.81502700 | -1.45446400 | 0.77076600  |
| O | -4.11908700 | -2.85796900 | 0.26801600  |
| C | -1.76191800 | -2.61563500 | 0.03203700  |
| C | -2.92737200 | -3.56085000 | 0.00352600  |
| H | -3.00626900 | -4.01566100 | -0.98427900 |
| H | -2.76822500 | -4.35378300 | 0.74836100  |
| N | -0.62021400 | -2.75444200 | -0.56061900 |
| C | -0.62189800 | -0.81863900 | 0.60538600  |
| N | 0.08978500  | -1.64046700 | -0.18951000 |
| C | 1.35904600  | -1.38543300 | -0.80849500 |
| C | 1.35490800  | -0.72126900 | -2.03708000 |
| C | 2.52633500  | -1.78908300 | -0.15685000 |
| C | 2.59320200  | -0.41587600 | -2.60095200 |
| C | 3.73816600  | -1.46960300 | -0.76607400 |
| C | 3.78989800  | -0.77145500 | -1.97605100 |
| H | 2.62286400  | 0.10307600  | -3.55563200 |

|   |             |             |             |
|---|-------------|-------------|-------------|
| H | 4.66495300  | -1.76793300 | -0.28203900 |
| H | -5.02220400 | -1.78141400 | 1.73384000  |
| C | -3.65244800 | 0.12078200  | 0.39134500  |
| H | -2.83403100 | 0.78689800  | 0.09712200  |
| H | -4.01164300 | -0.38159500 | -0.51311800 |
| C | -4.75594000 | 0.91547600  | 1.04371000  |
| C | -4.44404000 | 1.84266200  | 2.04455400  |
| C | -6.09189800 | 0.72383600  | 0.68800200  |
| C | -5.45180200 | 2.57004200  | 2.67049100  |
| H | -3.40226100 | 1.98356500  | 2.32744100  |
| C | -7.10164100 | 1.45045800  | 1.31603600  |
| H | -6.34030300 | 0.00391400  | -0.08806200 |
| C | -6.78320500 | 2.37465600  | 2.30698300  |
| H | -5.19981700 | 3.28894500  | 3.44369600  |
| H | -8.13662200 | 1.29373400  | 1.02993900  |
| H | -7.56951300 | 2.94021500  | 2.79604600  |
| C | 5.11545500  | -0.39337600 | -2.58179500 |
| H | 5.48496100  | 0.53769600  | -2.13954900 |
| H | 5.86656900  | -1.16527600 | -2.40091100 |
| H | 5.02868200  | -0.23984800 | -3.65927400 |
| C | 0.06138400  | -0.37844000 | -2.72902900 |
| H | -0.44278500 | -1.28960000 | -3.06584900 |
| H | -0.63241200 | 0.15045700  | -2.06566600 |
| H | 0.24547200  | 0.25547800  | -3.59839400 |
| C | 2.46286000  | -2.48161200 | 1.17699500  |
| H | 2.11757900  | -1.78857300 | 1.95414400  |
| H | 1.76892100  | -3.32602000 | 1.15173200  |
| H | 3.44770200  | -2.84867000 | 1.46816600  |
| C | 1.50733600  | 1.84038700  | 2.15408000  |
| C | 1.12140900  | 0.89770000  | 1.28020100  |
| H | 0.75601700  | 2.35598000  | 2.74908700  |
| C | 2.89502500  | 2.28508200  | 2.35849600  |
| C | 3.13142600  | 3.43327600  | 3.12447800  |
| C | 3.99950800  | 1.60739800  | 1.81997400  |
| C | 4.42406900  | 3.90334400  | 3.33379800  |
| H | 2.28670100  | 3.96414700  | 3.55605500  |
| C | 5.28988100  | 2.07718500  | 2.02698800  |
| H | 3.85357400  | 0.69637300  | 1.24441500  |
| C | 5.50940200  | 3.22874600  | 2.78282800  |
| H | 4.58320200  | 4.79720200  | 3.92850200  |
| H | 6.13152400  | 1.53817000  | 1.60303900  |
| H | 6.51896700  | 3.59137300  | 2.94543700  |
| C | -0.29290000 | 0.53055600  | 1.05388000  |
| O | -1.16239300 | 0.98375300  | 2.07089800  |

|   |             |            |             |
|---|-------------|------------|-------------|
| H | -0.76531900 | 0.76213700 | 2.92796700  |
| H | 1.86204200  | 0.44638000 | 0.63029800  |
| C | -1.85224800 | 3.36869500 | -0.48107100 |
| C | -1.95439800 | 4.55952700 | -1.16109200 |
| C | -0.92646000 | 4.94354900 | -2.06263600 |
| C | 0.16648800  | 4.04640000 | -2.19829800 |
| C | 0.17456200  | 2.87815800 | -1.47532900 |
| H | -2.62113400 | 3.05986000 | 0.22306900  |
| H | -2.81738500 | 5.18745900 | -0.98729200 |
| H | 0.99886100  | 4.26552500 | -2.85271400 |
| H | 1.00271900  | 2.17521300 | -1.55195200 |
| C | 0.10695900  | 6.46965200 | -3.64411200 |
| C | -2.12024700 | 6.99386000 | -2.58471600 |
| H | 0.22548300  | 5.73342300 | -4.44589800 |
| H | -0.11509300 | 7.43458900 | -4.09505000 |
| H | 1.05353200  | 6.55365400 | -3.09983000 |
| H | -3.05448900 | 6.49456500 | -2.86222100 |
| H | -2.20062500 | 7.34583600 | -1.55083200 |
| H | -1.98892800 | 7.85812400 | -3.23241000 |
| N | -0.98157700 | 6.10181900 | -2.75035600 |
| N | -0.81523200 | 2.53073600 | -0.63827100 |
| H | -0.62660700 | 1.44072800 | 0.06468400  |

## M2

|   |             |             |             |
|---|-------------|-------------|-------------|
| C | -3.02621000 | -0.63892100 | 0.51016000  |
| C | -4.15830600 | -1.64974800 | 0.68065300  |
| H | -3.06974500 | 0.08939500  | 1.32090800  |
| H | -4.17881600 | -2.02364500 | 1.71479300  |
| N | -1.76392800 | -1.37821000 | 0.61811800  |
| O | -4.01754400 | -2.73213600 | -0.22403100 |
| C | -1.67478900 | -2.70069800 | 0.23126400  |
| C | -2.91436200 | -3.53712500 | 0.13531900  |
| H | -2.78334700 | -4.30427500 | -0.62839800 |
| H | -3.10141700 | -4.02727000 | 1.10284300  |
| N | -0.46436600 | -3.08941200 | 0.03454700  |
| C | -0.46997200 | -0.85996000 | 0.59257500  |
| N | 0.30863400  | -1.97260300 | 0.31197000  |
| C | 1.69424600  | -1.98202200 | -0.01691100 |
| C | 2.06826200  | -1.82329200 | -1.35425800 |
| C | 2.63018500  | -2.06395800 | 1.01818300  |
| C | 3.42927500  | -1.74096500 | -1.64578100 |
| C | 3.97939900  | -1.96854200 | 0.68438000  |
| C | 4.39519100  | -1.80564500 | -0.63936000 |
| H | 3.74151600  | -1.60337000 | -2.67833300 |

|   |             |             |             |
|---|-------------|-------------|-------------|
| H | 4.72353600  | -2.00905600 | 1.47639600  |
| H | -5.11157500 | -1.16556800 | 0.45836400  |
| C | -3.09503100 | 0.08405900  | -0.84475200 |
| H | -2.16059900 | 0.64105900  | -0.97593500 |
| H | -3.14712200 | -0.67345600 | -1.63460700 |
| C | -4.27776200 | 1.01535500  | -0.92117400 |
| C | -4.29373200 | 2.18798700  | -0.15900100 |
| C | -5.38840200 | 0.71341900  | -1.71172300 |
| C | -5.38938600 | 3.04404500  | -0.19411200 |
| H | -3.43615800 | 2.42398200  | 0.46685600  |
| C | -6.48709900 | 1.56954800  | -1.75101100 |
| H | -5.38900400 | -0.20034900 | -2.30070600 |
| C | -6.48938700 | 2.73745500  | -0.99363000 |
| H | -5.38524300 | 3.95190700  | 0.40077100  |
| H | -7.34120900 | 1.32239900  | -2.37353900 |
| H | -7.34409300 | 3.40536900  | -1.02396900 |
| C | 5.86200700  | -1.70835100 | -0.97106800 |
| H | 6.40702900  | -1.17945800 | -0.18521300 |
| H | 6.30534900  | -2.70483200 | -1.06715100 |
| H | 6.01987300  | -1.18280800 | -1.91559700 |
| C | 1.01332100  | -1.68842200 | -2.41940700 |
| H | 0.38091700  | -2.57990900 | -2.45702800 |
| H | 0.35892100  | -0.83585000 | -2.20256900 |
| H | 1.46646300  | -1.53487200 | -3.40016500 |
| C | 2.16553600  | -2.17690100 | 2.44381900  |
| H | 1.61955000  | -1.27260900 | 2.73598600  |
| H | 1.48387100  | -3.02318000 | 2.56562400  |
| H | 3.01176700  | -2.30305200 | 3.12117100  |
| C | 1.60924000  | 2.20150700  | 1.14676300  |
| C | 1.23754100  | 0.96648400  | 0.73452900  |
| H | 0.89126900  | 2.82530400  | 1.67567100  |
| C | 2.94680000  | 2.77300800  | 0.98650500  |
| C | 3.21785100  | 4.03849400  | 1.53094100  |
| C | 3.99548200  | 2.11519000  | 0.31696700  |
| C | 4.47467800  | 4.62301200  | 1.42090400  |
| H | 2.42271000  | 4.56507000  | 2.05281600  |
| C | 5.25090600  | 2.69877000  | 0.20940800  |
| H | 3.83224300  | 1.13628300  | -0.12656400 |
| C | 5.50236100  | 3.95611200  | 0.75912500  |
| H | 4.65076700  | 5.60279300  | 1.85478800  |
| H | 6.04215000  | 2.16795900  | -0.31238500 |
| H | 6.48466800  | 4.40833100  | 0.66932100  |
| C | -0.08776500 | 0.43587500  | 0.85352400  |
| O | -1.08586500 | 1.29893100  | 1.31224400  |

|   |             |            |            |
|---|-------------|------------|------------|
| H | -0.99629900 | 2.11712100 | 0.80241400 |
| H | 1.97550000  | 0.33893500 | 0.24987300 |

**TS2<sup>D</sup>**

|   |             |             |             |
|---|-------------|-------------|-------------|
| C | -2.89710200 | -0.43128900 | 0.48509700  |
| C | -3.85509300 | -1.26542900 | 1.32910500  |
| H | -2.69742000 | 0.53500700  | 0.94346800  |
| H | -3.53519400 | -1.28446700 | 2.38084600  |
| N | -1.61975100 | -1.17378500 | 0.44863700  |
| O | -3.94002000 | -2.58728500 | 0.81649100  |
| C | -1.55010900 | -2.53132800 | 0.63913200  |
| C | -2.76001800 | -3.31302900 | 1.06858000  |
| H | -2.81269100 | -4.25183400 | 0.51510700  |
| H | -2.66629000 | -3.54311100 | 2.14037100  |
| N | -0.34589300 | -2.98262900 | 0.48967200  |
| C | -0.35999300 | -0.73789500 | 0.14704900  |
| N | 0.39392200  | -1.86423200 | 0.18334400  |
| C | 1.78155400  | -2.00178800 | -0.13797100 |
| C | 2.15739100  | -1.97975200 | -1.48191700 |
| C | 2.70185700  | -2.10404600 | 0.90897200  |
| C | 3.52059000  | -2.04558600 | -1.76884900 |
| C | 4.05146500  | -2.17261700 | 0.57341100  |
| C | 4.47724800  | -2.14005300 | -0.75767300 |
| H | 3.84131500  | -2.01820400 | -2.80719800 |
| H | 4.78975800  | -2.23936100 | 1.36892300  |
| H | -4.85581900 | -0.83301100 | 1.26845900  |
| C | -3.42490500 | -0.22955600 | -0.94285800 |
| H | -2.59602700 | 0.12803000  | -1.55872700 |
| H | -3.76249700 | -1.19540200 | -1.33349600 |
| C | -4.54074100 | 0.78536100  | -0.96285200 |
| C | -4.23258500 | 2.14123200  | -0.80583500 |
| C | -5.87504500 | 0.40051700  | -1.09952400 |
| C | -5.24708500 | 3.09266100  | -0.79425400 |
| H | -3.18817300 | 2.42718400  | -0.69470100 |
| C | -6.89143900 | 1.35439700  | -1.08683400 |
| H | -6.11689200 | -0.65298000 | -1.22132400 |
| C | -6.57844100 | 2.70193600  | -0.93526900 |
| H | -5.00014700 | 4.14330900  | -0.67678900 |
| H | -7.92564700 | 1.04373600  | -1.19785000 |
| H | -7.36849600 | 3.44636600  | -0.92758400 |
| C | 5.94418300  | -2.22835600 | -1.08976500 |
| H | 6.54630900  | -1.68602900 | -0.35659200 |
| H | 6.27843400  | -3.27082800 | -1.08480000 |
| H | 6.15092200  | -1.81618900 | -2.07957700 |

|   |              |              |              |
|---|--------------|--------------|--------------|
| C | 1. 12206300  | -1. 85416000 | -2. 56639100 |
| H | 0. 33803100  | -2. 60816800 | -2. 44729200 |
| H | 0. 64365400  | -0. 86932400 | -2. 52314200 |
| H | 1. 57578700  | -1. 97570600 | -3. 55097900 |
| C | 2. 23242800  | -2. 07142600 | 2. 33754600  |
| H | 1. 74328100  | -1. 11497500 | 2. 55426600  |
| H | 1. 50414100  | -2. 86410600 | 2. 52999700  |
| H | 3. 07154300  | -2. 18990800 | 3. 02438800  |
| C | 1. 63495400  | 2. 37592500  | 0. 30369100  |
| C | 1. 37677400  | 1. 07690000  | 0. 08610500  |
| H | 0. 79413400  | 3. 06450800  | 0. 28230100  |
| C | 2. 96169900  | 2. 93430700  | 0. 59395100  |
| C | 3. 05918500  | 4. 24292100  | 1. 08808200  |
| C | 4. 15375600  | 2. 21680300  | 0. 39896600  |
| C | 4. 29171800  | 4. 80958900  | 1. 39535700  |
| H | 2. 14728300  | 4. 81514000  | 1. 23757700  |
| C | 5. 38488200  | 2. 78142300  | 0. 70692400  |
| H | 4. 11825400  | 1. 21115000  | -0. 01218800 |
| C | 5. 46291100  | 4. 08024200  | 1. 20925500  |
| H | 4. 33750600  | 5. 82402300  | 1. 77978200  |
| H | 6. 29297600  | 2. 20807600  | 0. 54459300  |
| H | 6. 42694200  | 4. 51993900  | 1. 44414000  |
| C | 0. 01688700  | 0. 60433700  | -0. 21288700 |
| O | -1. 03416800 | 1. 58813700  | -0. 17201400 |
| H | -0. 48786500 | 0. 94098400  | -1. 22117200 |
| H | 2. 18071500  | 0. 34911600  | 0. 12764800  |

**TS2<sup>B</sup>**

|   |              |              |              |
|---|--------------|--------------|--------------|
| C | -3. 05543000 | -0. 85715700 | 1. 22411500  |
| C | -4. 03208200 | -2. 02093500 | 1. 35773900  |
| H | -2. 83721200 | -0. 39930100 | 2. 18658900  |
| H | -3. 72874200 | -2. 69377400 | 2. 17318200  |
| N | -1. 79194400 | -1. 41251900 | 0. 71247800  |
| O | -4. 12366900 | -2. 74661900 | 0. 13905000  |
| C | -1. 74623200 | -2. 55972900 | -0. 03893500 |
| C | -2. 93869400 | -3. 46835000 | -0. 10824500 |
| H | -3. 00989000 | -3. 91480800 | -1. 10112500 |
| H | -2. 81752500 | -4. 27404000 | 0. 63167400  |
| N | -0. 58367900 | -2. 75896500 | -0. 56484100 |
| C | -0. 55967200 | -0. 80449100 | 0. 63174300  |
| N | 0. 17385800  | -1. 68826600 | -0. 12071200 |
| C | 1. 41693300  | -1. 43148300 | -0. 77318900 |
| C | 1. 37981200  | -0. 85692800 | -2. 04680300 |
| C | 2. 61470300  | -1. 75396900 | -0. 12861800 |

|   |              |              |              |
|---|--------------|--------------|--------------|
| C | 2. 59674700  | -0. 56568500 | -2. 66475800 |
| C | 3. 80553100  | -1. 44614600 | -0. 78392900 |
| C | 3. 81505800  | -0. 84226300 | -2. 04398200 |
| H | 2. 59100600  | -0. 11870600 | -3. 65651200 |
| H | 4. 74963100  | -1. 68101800 | -0. 29737100 |
| H | -5. 02946000 | -1. 62944100 | 1. 57124100  |
| C | -3. 57331700 | 0. 21274200  | 0. 25126400  |
| H | -2. 71489000 | 0. 82822500  | -0. 03215600 |
| H | -3. 96692700 | -0. 28218600 | -0. 64406500 |
| C | -4. 62649200 | 1. 07986800  | 0. 89477200  |
| C | -4. 27020100 | 1. 90393900  | 1. 97098900  |
| C | -5. 95147400 | 1. 06903300  | 0. 45690600  |
| C | -5. 22746200 | 2. 70637400  | 2. 58375900  |
| H | -3. 23311500 | 1. 89108900  | 2. 30603600  |
| C | -6. 90933600 | 1. 87407400  | 1. 07215300  |
| H | -6. 23344500 | 0. 42750500  | -0. 37461200 |
| C | -6. 54845100 | 2. 69595600  | 2. 13557800  |
| H | -4. 94356400 | 3. 34196900  | 3. 41720900  |
| H | -7. 93628800 | 1. 85740300  | 0. 72010700  |
| H | -7. 29299900 | 3. 32332000  | 2. 61589700  |
| C | 5. 11966100  | -0. 48358600 | -2. 70696700 |
| H | 5. 52033800  | 0. 44610700  | -2. 28992900 |
| H | 5. 86923500  | -1. 26318600 | -2. 55031500 |
| H | 4. 99187400  | -0. 33941500 | -3. 78197500 |
| C | 0. 06201300  | -0. 59789900 | -2. 73031300 |
| H | -0. 41934500 | -1. 54342500 | -2. 99793100 |
| H | -0. 63125800 | -0. 05736300 | -2. 07539200 |
| H | 0. 20485600  | -0. 01079000 | -3. 64017600 |
| C | 2. 59915300  | -2. 36337200 | 1. 24600000  |
| H | 2. 21991100  | -1. 64126700 | 1. 97865300  |
| H | 1. 94349300  | -3. 23763800 | 1. 27789300  |
| H | 3. 60405600  | -2. 66349800 | 1. 54780600  |
| C | 1. 49520200  | 1. 79017700  | 2. 28295200  |
| C | 1. 14726300  | 0. 84261400  | 1. 39470000  |
| H | 0. 68849200  | 2. 24427800  | 2. 85350500  |
| C | 2. 85978600  | 2. 25662800  | 2. 54351700  |
| C | 3. 06601300  | 3. 29246000  | 3. 46832300  |
| C | 3. 99593900  | 1. 71385100  | 1. 91588800  |
| C | 4. 34061100  | 3. 77088000  | 3. 75284200  |
| H | 2. 20259100  | 3. 72415700  | 3. 96796500  |
| C | 5. 26886900  | 2. 19171500  | 2. 19821500  |
| H | 3. 88167400  | 0. 90346800  | 1. 19964800  |
| C | 5. 45282900  | 3. 22498900  | 3. 11773000  |
| H | 4. 46537100  | 4. 57268100  | 4. 47471800  |

|   |             |            |             |
|---|-------------|------------|-------------|
| H | 6.12802500  | 1.75229700 | 1.69912300  |
| H | 6.44943100  | 3.59464100 | 3.33700600  |
| C | -0.27690100 | 0.51463500 | 1.14782600  |
| O | -1.20456100 | 1.09393900 | 1.90996800  |
| H | 1.90213000  | 0.38485200 | 0.76300400  |
| C | -1.48401800 | 3.25894900 | -0.24634900 |
| C | -1.76174900 | 4.45855400 | -0.86709900 |
| C | -1.05916900 | 4.81984700 | -2.04195900 |
| C | -0.07675400 | 3.90770600 | -2.50183200 |
| C | 0.12583300  | 2.73129200 | -1.81384500 |
| H | -1.96876700 | 2.93703000 | 0.67075500  |
| H | -2.51315200 | 5.10550000 | -0.43520000 |
| H | 0.52461900  | 4.11628100 | -3.37631900 |
| H | 0.88309100  | 2.01768000 | -2.13390500 |
| C | -0.55414000 | 6.32401000 | -3.88595800 |
| C | -2.30135400 | 6.90718500 | -2.17030300 |
| H | -0.68269600 | 5.56463300 | -4.66506500 |
| H | -0.91578200 | 7.27405600 | -4.27521900 |
| H | 0.51590100  | 6.42426300 | -3.67008100 |
| H | -3.29206500 | 6.44162100 | -2.12629000 |
| H | -2.03469400 | 7.25357600 | -1.16541100 |
| H | -2.35958200 | 7.77356000 | -2.82693400 |
| N | -1.30897500 | 5.98347300 | -2.69291800 |
| N | -0.56949800 | 2.39870600 | -0.72091400 |
| H | -0.34071200 | 1.25966800 | -0.01561300 |

### TS3

|   |             |             |             |
|---|-------------|-------------|-------------|
| C | -3.50538400 | -2.40941800 | -1.41500000 |
| C | -4.53681000 | -3.49899200 | -1.44010900 |
| C | -5.95841800 | -2.12408200 | -0.24007600 |
| C | -4.96369800 | -0.97412400 | 0.02304000  |
| C | -2.49944700 | -0.62677200 | -0.60510300 |
| H | -4.03679300 | -4.46892200 | -1.42159400 |
| H | -4.82642800 | -0.82028000 | 1.09283300  |
| N | -2.38572700 | -2.34991800 | -2.06872500 |
| N | -1.77172500 | -1.21750500 | -1.59940400 |
| N | -3.65939500 | -1.36032500 | -0.54961600 |
| C | -0.64433700 | -0.66996600 | -2.29725400 |
| C | -0.80181000 | 0.56080000  | -2.95187600 |
| C | 0.57238300  | -1.35737700 | -2.27542100 |
| C | 0.34581800  | 1.17010200  | -3.45367300 |
| C | 1.69224900  | -0.70156300 | -2.78684400 |
| C | 1.60537100  | 0.57462800  | -3.34189900 |
| H | 0.25478400  | 2.14333600  | -3.93057900 |



|   |             |             |             |
|---|-------------|-------------|-------------|
| H | 2.65865200  | -1.19811400 | -2.72839500 |
| O | -5.32802100 | -3.38716000 | -0.28074000 |
| H | -5.15177800 | -3.43237900 | -2.34897500 |
| H | -6.69723200 | -2.14940500 | 0.56154700  |
| C | -2.15120000 | 1.21419300  | -3.10626700 |
| H | -2.93925500 | 0.46831600  | -3.25007000 |
| H | -2.40868100 | 1.81660600  | -2.22893700 |
| H | -2.14548800 | 1.87427300  | -3.97557700 |
| C | 2.84185700  | 1.28342500  | -3.82783700 |
| H | 2.93054400  | 1.21858500  | -4.91722500 |
| H | 2.80913600  | 2.34367800  | -3.56034400 |
| H | 3.74138900  | 0.84258300  | -3.38927800 |
| C | 0.66588500  | -2.76550500 | -1.76553400 |
| H | 0.19751700  | -2.86465800 | -0.78481000 |
| H | 0.14454500  | -3.44878800 | -2.44258200 |
| H | 1.71096500  | -3.06687000 | -1.69677800 |
| C | -2.16548900 | 0.48582300  | 0.23281000  |
| O | -3.05371700 | 0.87890100  | 1.11357500  |
| C | -0.95117300 | 1.22908900  | -0.03106800 |
| C | -0.87472400 | 2.56748500  | 0.08195400  |
| H | -0.07886500 | 0.65076100  | -0.32838800 |
| C | 0.32527000  | 3.36291100  | -0.16573400 |
| C | 1.53323400  | 2.79077400  | -0.60170200 |
| C | 0.27482800  | 4.75402900  | 0.01109500  |
| C | 2.63410100  | 3.59213100  | -0.86847900 |
| H | 1.61647300  | 1.71627600  | -0.74441100 |
| C | 1.38689000  | 5.55216700  | -0.23792900 |
| H | -0.65404000 | 5.20793500  | 0.34826700  |
| C | 2.57229500  | 4.97472400  | -0.68484000 |
| H | 3.54824800  | 3.12750500  | -1.22337500 |
| H | 1.32467600  | 6.62546600  | -0.08918300 |
| H | 3.44082900  | 5.59145800  | -0.89223000 |
| H | -2.62644700 | 0.57523800  | 2.21355400  |
| C | 0.24284700  | 0.88520900  | 2.83870300  |
| C | 1.41639500  | 0.65940500  | 2.17592000  |
| C | 1.69369400  | -0.55343700 | 1.45741100  |
| C | 0.71697600  | -1.58319500 | 1.57482900  |
| C | -0.50616800 | -1.40979800 | 2.18485300  |
| C | -0.81404500 | -0.10243400 | 2.72073800  |
| H | 2.19419700  | 1.40777000  | 2.23142400  |
| H | 0.95064700  | -2.55838000 | 1.17424500  |
| C | 2.90895200  | -0.73326200 | 0.73628400  |
| C | 3.28460500  | -2.01645700 | 0.21496400  |
| C | 3.85522600  | 0.33087000  | 0.54328000  |

|   |              |              |              |
|---|--------------|--------------|--------------|
| C | 4. 38669200  | -2. 22694100 | -0. 55754200 |
| H | 2. 67358300  | -2. 87104300 | 0. 47521200  |
| C | 4. 99793800  | 0. 19556700  | -0. 19019200 |
| H | 3. 65806700  | 1. 28780300  | 1. 01168400  |
| C | 5. 22841300  | -1. 06746400 | -0. 92336200 |
| O | -2. 01086100 | 0. 19653600  | 3. 14357800  |
| O | 6. 11359500  | -1. 15967300 | -1. 78793900 |
| C | -1. 39433400 | -2. 64150100 | 2. 45330400  |
| C | -2. 88353800 | -2. 33555100 | 2. 68020400  |
| C | -1. 31932700 | -3. 65621500 | 1. 30085700  |
| C | -0. 84358100 | -3. 30564900 | 3. 73027900  |
| H | -3. 06089200 | -1. 84369400 | 3. 63526300  |
| H | -3. 26740400 | -1. 68330800 | 1. 89707100  |
| H | -3. 44617900 | -3. 27470300 | 2. 65306100  |
| H | -0. 31677700 | -4. 06607100 | 1. 15145000  |
| H | -1. 97808700 | -4. 50138300 | 1. 52233400  |
| H | -1. 65153400 | -3. 20975500 | 0. 35707800  |
| H | -1. 44667100 | -4. 18334200 | 3. 98819000  |
| H | 0. 19389900  | -3. 62421500 | 3. 59115700  |
| H | -0. 87821400 | -2. 60606300 | 4. 57118100  |
| C | 0. 05172000  | 2. 10344900  | 3. 75489600  |
| C | -1. 06389400 | 3. 05382300  | 3. 28348000  |
| C | -0. 27847100 | 1. 58343800  | 5. 16822500  |
| C | 1. 33547800  | 2. 93837200  | 3. 84944100  |
| H | -0. 73243000 | 3. 62567900  | 2. 41365800  |
| H | -1. 98311400 | 2. 52710100  | 3. 03079700  |
| H | -1. 27936900 | 3. 76810600  | 4. 08606400  |
| H | 0. 50139500  | 0. 89909400  | 5. 51834700  |
| H | -0. 33008700 | 2. 42645300  | 5. 86553600  |
| H | -1. 23622400 | 1. 06120400  | 5. 18217900  |
| H | 1. 16135400  | 3. 77925800  | 4. 52763200  |
| H | 2. 17510400  | 2. 35696000  | 4. 24414000  |
| H | 1. 62019500  | 3. 35224900  | 2. 87498800  |
| C | 6. 07916500  | 1. 27789100  | -0. 25208300 |
| C | 6. 22254300  | 1. 84373000  | -1. 67657600 |
| C | 5. 78899000  | 2. 43179000  | 0. 71615300  |
| C | 7. 42599100  | 0. 66148700  | 0. 17913800  |
| H | 6. 48512500  | 1. 05100700  | -2. 37777800 |
| H | 5. 29078700  | 2. 31003000  | -2. 01382200 |
| H | 7. 00616100  | 2. 60976000  | -1. 69349700 |
| H | 5. 71103600  | 2. 07308000  | 1. 74796400  |
| H | 6. 61344700  | 3. 15001900  | 0. 67154000  |
| H | 4. 86944200  | 2. 97178500  | 0. 47359400  |
| H | 8. 19801600  | 1. 43872900  | 0. 18636000  |

|   |              |             |             |
|---|--------------|-------------|-------------|
| H | 7.35044400   | 0.24853600  | 1.19051100  |
| H | 7.73468800   | -0.13050200 | -0.50295800 |
| C | 4.79205600   | -3.61460300 | -1.05867800 |
| C | 4.66597000   | -3.68131100 | -2.59245700 |
| C | 6.24851200   | -3.90890900 | -0.65046500 |
| C | 3.91828900   | -4.72122000 | -0.45447000 |
| H | 3.62633700   | -3.52899000 | -2.90530600 |
| H | 5.29132400   | -2.92178900 | -3.06257000 |
| H | 4.97847000   | -4.66980800 | -2.94782000 |
| H | 6.35464200   | -3.87171900 | 0.43891100  |
| H | 6.52804200   | -4.91402600 | -0.98433800 |
| H | 6.93421600   | -3.18864200 | -1.09587400 |
| H | 4.27598000   | -5.69209600 | -0.81019800 |
| H | 3.97117700   | -4.72313500 | 0.63930600  |
| H | 2.86686600   | -4.63431100 | -0.74863800 |
| H | -1.77499000  | 3.11062200  | 0.36513300  |
| H | -6.48540600  | -1.94546300 | -1.19074900 |
| C | -5.46381000  | 0.32970300  | -0.61840500 |
| H | -5.66100000  | 0.14734700  | -1.68167400 |
| H | -4.67849600  | 1.08461000  | -0.53666200 |
| C | -6.70920300  | 0.81128500  | 0.08572400  |
| C | -7.97771300  | 0.64905700  | -0.47309400 |
| C | -6.59264100  | 1.40028400  | 1.34919600  |
| C | -9.11338900  | 1.06769200  | 0.21741700  |
| H | -8.07734100  | 0.20146300  | -1.45904200 |
| C | -7.72532000  | 1.81745600  | 2.03988100  |
| H | -5.60138600  | 1.53565200  | 1.77650900  |
| C | -8.98936000  | 1.65048700  | 1.47536100  |
| H | -10.09418900 | 0.94033000  | -0.22962100 |
| H | -7.62217700  | 2.27687700  | 3.01777000  |
| H | -9.87339300  | 1.97689800  | 2.01353200  |

### M3

|   |             |             |             |
|---|-------------|-------------|-------------|
| C | -3.55241500 | -2.31597300 | -1.79196500 |
| C | -4.55340200 | -3.43318700 | -1.78864400 |
| C | -5.98775700 | -2.10672600 | -0.55511800 |
| C | -5.02721600 | -0.92721700 | -0.31369600 |
| C | -2.60305500 | -0.45368000 | -1.02636200 |
| H | -4.03256000 | -4.39183000 | -1.79312300 |
| H | -4.83675200 | -0.80886900 | 0.75527700  |
| N | -2.43933400 | -2.25971900 | -2.43866400 |
| N | -1.86987600 | -1.05887100 | -2.03771600 |
| N | -3.75610000 | -1.23184100 | -0.97069300 |
| C | -0.65308600 | -0.59891400 | -2.60854500 |

|   |             |             |             |
|---|-------------|-------------|-------------|
| C | -0.65807900 | 0.60173900  | -3.33575300 |
| C | 0.53129000  | -1.28983100 | -2.33375300 |
| C | 0.56891500  | 1.14648400  | -3.70728800 |
| C | 1.73639700  | -0.71534400 | -2.74019200 |
| C | 1.77631800  | 0.51280400  | -3.40016300 |
| H | 0.58423100  | 2.09621100  | -4.23732400 |
| H | 2.66800300  | -1.22669700 | -2.50840000 |
| O | -5.32037700 | -3.35070400 | -0.60730100 |
| H | -5.20256600 | -3.37853200 | -2.67511300 |
| H | -6.71339900 | -2.15397200 | 0.25813400  |
| C | -1.95006600 | 1.31463000  | -3.62668400 |
| H | -2.72682100 | 0.60632600  | -3.92918400 |
| H | -2.31144500 | 1.83697200  | -2.73288600 |
| H | -1.81294000 | 2.05031900  | -4.42117200 |
| C | 3.09191200  | 1.15272600  | -3.75960500 |
| H | 3.19349200  | 1.26895800  | -4.84316000 |
| H | 3.16264800  | 2.15172600  | -3.31614100 |
| H | 3.93626200  | 0.55633200  | -3.40187900 |
| C | 0.49647900  | -2.58962800 | -1.57966900 |
| H | -0.10252400 | -2.48415100 | -0.66849000 |
| H | 0.03420600  | -3.38090400 | -2.17626600 |
| H | 1.50886100  | -2.89797000 | -1.30698500 |
| C | -2.26043300 | 0.59804300  | -0.20780600 |
| O | -3.20014900 | 1.02573800  | 0.72951300  |
| C | -1.03427700 | 1.33184100  | -0.31632000 |
| C | -0.81750200 | 2.56443700  | 0.19587100  |
| H | -0.22366800 | 0.84860700  | -0.84788500 |
| C | 0.44540200  | 3.28411100  | 0.05708900  |
| C | 1.61407200  | 2.67322600  | -0.43426700 |
| C | 0.51965700  | 4.64814900  | 0.38961500  |
| C | 2.78225400  | 3.40342000  | -0.60349200 |
| H | 1.61891100  | 1.61572200  | -0.68661700 |
| C | 1.69854000  | 5.37208200  | 0.24022800  |
| H | -0.37315500 | 5.14605200  | 0.76088800  |
| C | 2.84166300  | 4.75535900  | -0.26283800 |
| H | 3.65777100  | 2.89920500  | -1.00049000 |
| H | 1.71964300  | 6.42405700  | 0.50849900  |
| H | 3.76303900  | 5.31459100  | -0.39207800 |
| H | -2.78361100 | 0.91811000  | 1.60356700  |
| C | 0.62356600  | 1.02992500  | 2.87376000  |
| C | 1.77519000  | 0.80488600  | 2.20251200  |
| C | 2.05965900  | -0.43882100 | 1.50175800  |
| C | 1.09774000  | -1.51532000 | 1.68668400  |
| C | -0.09581800 | -1.35225000 | 2.29477000  |

|   |             |             |             |
|---|-------------|-------------|-------------|
| C | -0.46474500 | 0.01881300  | 2.74541900  |
| H | 2.54786200  | 1.56024200  | 2.22988500  |
| H | 1.34926400  | -2.49613200 | 1.31126100  |
| C | 3.21479500  | -0.62755900 | 0.75969800  |
| C | 3.56000000  | -1.93027300 | 0.20661000  |
| C | 4.17739300  | 0.44201800  | 0.52811300  |
| C | 4.57079200  | -2.12548100 | -0.66562400 |
| H | 2.99156700  | -2.78936100 | 0.53326400  |
| C | 5.23213600  | 0.31709000  | -0.30851500 |
| H | 4.04291000  | 1.37421800  | 1.06089800  |
| C | 5.33851500  | -0.93047600 | -1.12254800 |
| O | -1.63161300 | 0.29443400  | 3.03059000  |
| O | 6.04285600  | -0.97433200 | -2.12600400 |
| C | -1.06784700 | -2.50725700 | 2.53979300  |
| C | -2.29774100 | -2.37535200 | 1.62549000  |
| C | -0.40681100 | -3.86133800 | 2.25087500  |
| C | -1.50450500 | -2.50873800 | 4.01784400  |
| H | -2.77733000 | -1.40137000 | 1.73995900  |
| H | -2.00387700 | -2.49432400 | 0.57682800  |
| H | -3.02659100 | -3.15911900 | 1.86131200  |
| H | 0.49190700  | -4.00971700 | 2.85875200  |
| H | -1.11376600 | -4.66056100 | 2.49086600  |
| H | -0.13727900 | -3.97400200 | 1.19512800  |
| H | -2.12986900 | -3.38656000 | 4.20868300  |
| H | -0.63247300 | -2.56470500 | 4.67832100  |
| H | -2.07727500 | -1.61591500 | 4.26817700  |
| C | 0.43655300  | 2.20307300  | 3.83874800  |
| C | -0.75223700 | 3.11782200  | 3.49612400  |
| C | 0.21288300  | 1.59372400  | 5.23847100  |
| C | 1.69037400  | 3.08448900  | 3.88291200  |
| H | -0.54429000 | 3.68370400  | 2.58731800  |
| H | -1.67707200 | 2.55794900  | 3.36829200  |
| H | -0.88558200 | 3.83464800  | 4.31403400  |
| H | 1.04661700  | 0.94133200  | 5.51767400  |
| H | 0.14195300  | 2.39552500  | 5.98042500  |
| H | -0.71323700 | 1.01433400  | 5.27194300  |
| H | 1.52739500  | 3.89910900  | 4.59459100  |
| H | 2.57337800  | 2.52630000  | 4.21102700  |
| H | 1.89466400  | 3.53228400  | 2.90298100  |
| C | 6.33429600  | 1.36835300  | -0.44617800 |
| C | 6.33727200  | 2.01044500  | -1.84599900 |
| C | 6.18480100  | 2.47565400  | 0.60489300  |
| C | 7.69483700  | 0.68192400  | -0.20610400 |
| H | 6.50269600  | 1.26257200  | -2.62093100 |

|   |              |             |             |
|---|--------------|-------------|-------------|
| H | 5.39269200   | 2.52249900  | -2.05271800 |
| H | 7.13864400   | 2.75531200  | -1.89745300 |
| H | 6.20032200   | 2.06599300  | 1.62031300  |
| H | 7.02361600   | 3.17134400  | 0.51019400  |
| H | 5.26366300   | 3.05273600  | 0.48032400  |
| H | 8.48999600   | 1.43341800  | -0.24216600 |
| H | 7.72117200   | 0.20726700  | 0.78041700  |
| H | 7.90001500   | -0.07267000 | -0.96667900 |
| C | 4.94135500   | -3.49787900 | -1.22389500 |
| C | 4.57808000   | -3.57226800 | -2.71892700 |
| C | 6.45169400   | -3.73986700 | -1.03920900 |
| C | 4.19454000   | -4.62006100 | -0.49263800 |
| H | 3.49674100   | -3.46441000 | -2.85944000 |
| H | 5.08798600   | -2.79483300 | -3.28831200 |
| H | 4.87258800   | -4.54980600 | -3.11559100 |
| H | 6.72614500   | -3.67468400 | 0.01895800  |
| H | 6.70439700   | -4.74441000 | -1.39284700 |
| H | 7.04345200   | -3.01710700 | -1.60165300 |
| H | 4.52859100   | -5.58458100 | -0.88515600 |
| H | 4.39622400   | -4.60515600 | 0.58352600  |
| H | 3.11133600   | -4.56538600 | -0.64591400 |
| H | -1.63624600  | 3.08383200  | 0.68791700  |
| H | -6.53590000  | -1.94787000 | -1.49820400 |
| C | -5.63288100  | 0.37219200  | -0.87016600 |
| H | -5.90610600  | 0.20643000  | -1.91918700 |
| H | -4.86931600  | 1.15250900  | -0.83688000 |
| C | -6.83487700  | 0.79499300  | -0.06143500 |
| C | -8.13791100  | 0.54383500  | -0.49508500 |
| C | -6.64243000  | 1.41727400  | 1.17648800  |
| C | -9.22989700  | 0.90578900  | 0.29158800  |
| H | -8.29879100  | 0.06970300  | -1.46048100 |
| C | -7.73095400  | 1.77931100  | 1.96350700  |
| H | -5.62608600  | 1.62133600  | 1.50498700  |
| C | -9.02843000  | 1.52310500  | 1.52286700  |
| H | -10.23770000 | 0.70890900  | -0.06053800 |
| H | -7.56806300  | 2.26573600  | 2.92018800  |
| H | -9.87849300  | 1.80749400  | 2.13470800  |

**TS3<sup>HCT2</sup>**

|   |             |             |             |
|---|-------------|-------------|-------------|
| C | -3.39934800 | -0.47714200 | -3.46332500 |
| C | -4.49133300 | -1.34031500 | -4.02070000 |
| C | -5.80156800 | -0.82481200 | -2.17975500 |
| C | -4.75857200 | -0.01692900 | -1.38993600 |
| C | -2.35221000 | 0.67734900  | -1.93937600 |

|   |             |             |             |
|---|-------------|-------------|-------------|
| H | -4.04579500 | -2.16774000 | -4.57415800 |
| H | -4.45466400 | -0.55528200 | -0.49390500 |
| N | -2.22189000 | -0.23940100 | -3.97194100 |
| N | -1.58323100 | 0.48667500  | -3.01877500 |
| N | -3.53415600 | 0.08594200  | -2.22419100 |
| C | -0.18464800 | 0.80799700  | -3.15030900 |
| C | 0.18722700  | 1.88357700  | -3.96199000 |
| C | 0.72027000  | 0.04929400  | -2.40848000 |
| C | 1.54061800  | 2.21064800  | -3.99185300 |
| C | 2.05880700  | 0.43696600  | -2.44951900 |
| C | 2.48706200  | 1.50485300  | -3.23732700 |
| H | 1.86489100  | 3.04157600  | -4.61375300 |
| H | 2.78052200  | -0.11629000 | -1.85427700 |
| O | -5.22494400 | -1.86585200 | -2.94175400 |
| H | -5.13472700 | -0.76040200 | -4.69751200 |
| H | -6.49390100 | -1.27857100 | -1.46981000 |
| C | -0.84290300 | 2.65970100  | -4.73884700 |
| H | -1.37001000 | 2.01344400  | -5.44655300 |
| H | -1.59487900 | 3.09833500  | -4.07286900 |
| H | -0.37141900 | 3.47050100  | -5.29546600 |
| C | 3.94901000  | 1.85850000  | -3.30156800 |
| H | 4.38091300  | 1.50138200  | -4.24246300 |
| H | 4.09612700  | 2.94160500  | -3.26158900 |
| H | 4.50124500  | 1.40095200  | -2.47569800 |
| C | 0.26856900  | -1.13645100 | -1.60344500 |
| H | -0.22820300 | -0.83212500 | -0.67552300 |
| H | -0.42889700 | -1.75999100 | -2.17320700 |
| H | 1.13023800  | -1.74500900 | -1.32061200 |
| C | -2.00868400 | 1.34778900  | -0.65635200 |
| O | -2.67112900 | 1.00304600  | 0.34452700  |
| C | -1.00727900 | 2.39074700  | -0.67447300 |
| C | -0.60349100 | 2.99801500  | 0.46220600  |
| H | -0.62310400 | 2.71403500  | -1.63519500 |
| C | 0.33187600  | 4.11566900  | 0.51247900  |
| C | 1.23879200  | 4.37666500  | -0.52769500 |
| C | 0.30602200  | 4.97516600  | 1.62157800  |
| C | 2.07144500  | 5.48609400  | -0.46860300 |
| H | 1.31560600  | 3.68506600  | -1.36397000 |
| C | 1.14017900  | 6.08606300  | 1.67606500  |
| H | -0.39476900 | 4.77908000  | 2.42862000  |
| C | 2.02100400  | 6.34649000  | 0.62858300  |
| H | 2.77971900  | 5.67005500  | -1.27019000 |
| H | 1.10496800  | 6.74619600  | 2.53621400  |
| H | 2.67859800  | 7.20846600  | 0.67228000  |

|   |             |             |             |
|---|-------------|-------------|-------------|
| H | -2.15993100 | -0.00314800 | 1.44197000  |
| C | -1.28414700 | 0.41471400  | 3.16575300  |
| C | 0.04177100  | 0.46607200  | 2.84597700  |
| C | 0.68256900  | -0.49752300 | 1.99939300  |
| C | -0.08583100 | -1.65826200 | 1.66592100  |
| C | -1.42419700 | -1.76567500 | 1.91358300  |
| C | -2.18124500 | -0.61303800 | 2.51562600  |
| H | 0.65884300  | 1.24768900  | 3.27039200  |
| H | 0.40568200  | -2.45901700 | 1.13149900  |
| C | 1.99192300  | -0.29966500 | 1.48386600  |
| C | 2.71996600  | -1.35398100 | 0.84756100  |
| C | 2.65063200  | 0.96701400  | 1.56689400  |
| C | 3.93930100  | -1.18416500 | 0.25701900  |
| H | 2.29326600  | -2.34923800 | 0.86669500  |
| C | 3.88018200  | 1.21568100  | 1.02455200  |
| H | 2.12958300  | 1.77794100  | 2.06291300  |
| C | 4.54443400  | 0.16161300  | 0.24031300  |
| O | -3.42062800 | -0.75036400 | 2.89577100  |
| O | 5.58122400  | 0.39587700  | -0.41472900 |
| C | -2.21065800 | -2.99824400 | 1.48287100  |
| C | -3.32918000 | -2.56603800 | 0.52132900  |
| C | -1.34141400 | -4.03867100 | 0.76772000  |
| C | -2.81949400 | -3.65282800 | 2.73714300  |
| H | -3.98875200 | -1.85966500 | 1.03077300  |
| H | -2.89430200 | -2.09738700 | -0.37316500 |
| H | -3.90698300 | -3.43800700 | 0.19598600  |
| H | -0.52778500 | -4.39824200 | 1.40562500  |
| H | -1.96214200 | -4.90037100 | 0.50404900  |
| H | -0.90722500 | -3.64456100 | -0.15862500 |
| H | -3.43275800 | -4.51186500 | 2.44305700  |
| H | -2.02493900 | -4.01304600 | 3.39881200  |
| H | -3.43354600 | -2.92818400 | 3.27204200  |
| C | -1.91167900 | 1.40464800  | 4.14244300  |
| C | -3.08374400 | 2.15628700  | 3.48496800  |
| C | -2.43250000 | 0.60397000  | 5.35236600  |
| C | -0.90092400 | 2.43687500  | 4.65474100  |
| H | -2.74858700 | 2.75200600  | 2.62868600  |
| H | -3.84102700 | 1.45091100  | 3.14518500  |
| H | -3.52524300 | 2.84082700  | 4.21781100  |
| H | -1.60424800 | 0.09980900  | 5.86125000  |
| H | -2.90581700 | 1.28726800  | 6.06645500  |
| H | -3.15820400 | -0.13872300 | 5.02034100  |
| H | -1.40759700 | 3.12476500  | 5.33835500  |
| H | -0.07968000 | 1.96473500  | 5.20307000  |



|   |             |             |             |
|---|-------------|-------------|-------------|
| H | -0.46822000 | 3.03045100  | 3.84140300  |
| C | 4.59577600  | 2.55689700  | 1.20470100  |
| C | 4.81495000  | 3.24839200  | -0.15252000 |
| C | 3.79445500  | 3.50731700  | 2.10076600  |
| C | 5.96042600  | 2.31688300  | 1.87768400  |
| H | 5.51248300  | 2.67834200  | -0.76562000 |
| H | 3.86389600  | 3.33751200  | -0.68779900 |
| H | 5.21366000  | 4.25848700  | 0.00275200  |
| H | 3.63125200  | 3.07938400  | 3.09609000  |
| H | 4.34899300  | 4.44341000  | 2.22355100  |
| H | 2.82207300  | 3.75588700  | 1.66491400  |
| H | 6.48065200  | 3.27263600  | 2.00944900  |
| H | 5.82554300  | 1.86456300  | 2.86575200  |
| H | 6.58191400  | 1.65933800  | 1.26877300  |
| C | 4.69747700  | -2.34433200 | -0.39539300 |
| C | 4.83686700  | -2.10308000 | -1.91015300 |
| C | 6.09530700  | -2.47358300 | 0.23736800  |
| C | 3.97440300  | -3.68256900 | -0.20280700 |
| H | 3.85175900  | -2.10382600 | -2.39225800 |
| H | 5.32969200  | -1.15001200 | -2.10606500 |
| H | 5.42807900  | -2.90793900 | -2.36207200 |
| H | 6.00984900  | -2.66628700 | 1.31190500  |
| H | 6.63222200  | -3.31337000 | -0.21778600 |
| H | 6.67283800  | -1.56157500 | 0.08732800  |
| H | 4.56101800  | -4.47902200 | -0.67110700 |
| H | 3.85544200  | -3.93083500 | 0.85709800  |
| H | 2.98353300  | -3.68452700 | -0.67180200 |
| H | -1.02693500 | 2.65555000  | 1.40536200  |
| H | -6.36936900 | -0.15111100 | -2.84057700 |
| C | -5.33511100 | 1.34630900  | -0.99346300 |
| H | -5.77385600 | 1.83054100  | -1.87302300 |
| H | -4.54290400 | 1.99175000  | -0.61120500 |
| C | -6.37664400 | 1.13524400  | 0.08449500  |
| C | -7.72311600 | 1.42101700  | -0.13972100 |
| C | -5.98134400 | 0.61243800  | 1.32163800  |
| C | -8.66713300 | 1.19945100  | 0.86200300  |
| H | -8.03536600 | 1.82363000  | -1.10044100 |
| C | -6.92583900 | 0.38849800  | 2.31802300  |
| H | -4.93687200 | 0.37068200  | 1.52453400  |
| C | -8.27013800 | 0.68319700  | 2.09227800  |
| H | -9.71193500 | 1.42940700  | 0.67809600  |
| H | -6.59840300 | -0.01742400 | 3.27012000  |
| H | -9.00585900 | 0.51041300  | 2.87129500  |

**TS3<sup>HCT3</sup>**

|   |             |             |             |
|---|-------------|-------------|-------------|
| C | -5.52808100 | 0.32362600  | 0.08983800  |
| C | -6.61621100 | 1.22541500  | 0.59345500  |
| C | -5.27792700 | 3.03945200  | 0.08287100  |
| C | -3.98939600 | 2.27493300  | -0.26714100 |
| C | -3.48209100 | -0.24110200 | -0.46090200 |
| H | -7.14509300 | 0.73014500  | 1.40869100  |
| H | -3.20912500 | 2.49093000  | 0.46142100  |
| N | -5.57542800 | -0.96333700 | -0.08580000 |
| N | -4.30693200 | -1.30532400 | -0.44801400 |
| N | -4.28244600 | 0.82444200  | -0.17128900 |
| C | -4.03817600 | -2.66576000 | -0.82065200 |
| C | -3.90218700 | -2.95387700 | -2.18237500 |
| C | -3.97118900 | -3.63509200 | 0.18260500  |
| C | -3.62068100 | -4.27351800 | -2.52983200 |
| C | -3.69893600 | -4.94111100 | -0.22121800 |
| C | -3.50916100 | -5.27564200 | -1.56288400 |
| H | -3.49417800 | -4.52445400 | -3.57979600 |
| H | -3.61893600 | -5.71551100 | 0.53772100  |
| O | -6.02603900 | 2.40003300  | 1.09501300  |
| H | -7.33099900 | 1.45102600  | -0.21073700 |
| H | -5.00734300 | 4.03225600  | 0.44451900  |
| C | -4.02935100 | -1.87500500 | -3.22602600 |
| H | -4.93404300 | -1.27978500 | -3.06782800 |
| H | -3.17234600 | -1.19159100 | -3.20162800 |
| H | -4.07819600 | -2.31402900 | -4.22331400 |
| C | -3.21701900 | -6.69973500 | -1.95646400 |
| H | -2.84479500 | -6.76037800 | -2.98092400 |
| H | -2.47229600 | -7.14305300 | -1.29077500 |
| H | -4.12270700 | -7.31056800 | -1.89049600 |
| C | -4.17074200 | -3.27675300 | 1.62965800  |
| H | -3.53910600 | -2.42891400 | 1.91159400  |
| H | -5.21417200 | -3.00517700 | 1.81720500  |
| H | -3.91308200 | -4.12537300 | 2.26634600  |
| C | -2.03223500 | -0.14591300 | -0.63005400 |
| O | -1.52141200 | 0.97367100  | -0.25773900 |
| C | -1.22974300 | -1.19880500 | -1.16970400 |
| C | 0.12249000  | -1.05351800 | -1.21996900 |
| H | -1.70082500 | -2.12632300 | -1.47007400 |
| C | 1.08604000  | -2.02858600 | -1.70523800 |
| C | 0.72009200  | -3.24672400 | -2.30632600 |
| C | 2.45188100  | -1.74891600 | -1.53467200 |
| C | 1.69040500  | -4.16218000 | -2.68734600 |
| H | -0.32929300 | -3.47961100 | -2.47068700 |

|   |             |             |             |
|---|-------------|-------------|-------------|
| C | 3.42196900  | -2.66771000 | -1.91676900 |
| H | 2.75083700  | -0.80546000 | -1.08428100 |
| C | 3.04428700  | -3.88087600 | -2.48805200 |
| H | 1.39397000  | -5.10078100 | -3.14478100 |
| H | 4.47058600  | -2.42960300 | -1.76652800 |
| H | 3.79806700  | -4.60300800 | -2.78493300 |
| H | -0.78414300 | 0.89599900  | 0.83068100  |
| C | -0.21295100 | 0.72766300  | 1.97710200  |
| C | 1.14238500  | 1.11393600  | 1.73972900  |
| C | 2.15275800  | 0.21525100  | 1.42526200  |
| C | 1.84274100  | -1.18892600 | 1.59612300  |
| C | 0.60321900  | -1.68906700 | 1.84513300  |
| C | -0.52441400 | -0.73919700 | 1.95835100  |
| H | 1.38978100  | 2.16789100  | 1.79780300  |
| H | 2.65660200  | -1.89085500 | 1.46373900  |
| C | 3.45340600  | 0.63760200  | 0.96319800  |
| C | 4.58611300  | -0.21779800 | 0.98654400  |
| C | 3.63367400  | 1.92591200  | 0.39277300  |
| C | 5.82070400  | 0.15146900  | 0.51500700  |
| H | 4.47694000  | -1.20050700 | 1.43056200  |
| C | 4.83001000  | 2.37346600  | -0.10376200 |
| H | 2.75924600  | 2.56190200  | 0.30560000  |
| C | 6.00901000  | 1.49885800  | -0.04262500 |
| O | -1.70700500 | -1.10776400 | 1.93865300  |
| O | 7.12629100  | 1.88134100  | -0.45883000 |
| C | 0.34738100  | -3.18087500 | 2.07879100  |
| C | -0.25782700 | -3.35361300 | 3.48500400  |
| C | -0.62247400 | -3.75842700 | 1.03515200  |
| C | 1.64558500  | -3.99251300 | 2.00633500  |
| H | 0.41052700  | -2.94058600 | 4.24776600  |
| H | -1.22577900 | -2.85299600 | 3.55775700  |
| H | -0.40099900 | -4.41861000 | 3.69713900  |
| H | -0.15570300 | -3.78327000 | 0.04626000  |
| H | -0.88406500 | -4.78803600 | 1.30905800  |
| H | -1.53533100 | -3.16872900 | 0.98027500  |
| H | 1.41957800  | -5.04649400 | 2.19477900  |
| H | 2.10595500  | -3.92108500 | 1.01386100  |
| H | 2.37503600  | -3.66655200 | 2.75522700  |
| C | -1.03901800 | 1.65916800  | 2.91665600  |
| C | -2.52211500 | 1.27674100  | 3.03189100  |
| C | -0.41659800 | 1.57787000  | 4.32012000  |
| C | -0.96404200 | 3.10939100  | 2.41180300  |
| H | -2.98966900 | 1.16337200  | 2.05179800  |
| H | -2.65735100 | 0.33346400  | 3.56111800  |

|   |             |             |             |
|---|-------------|-------------|-------------|
| H | -3.04580900 | 2.06567700  | 3.58235000  |
| H | 0.62726400  | 1.90458600  | 4.30820300  |
| H | -0.97195800 | 2.21338700  | 5.01855500  |
| H | -0.44834500 | 0.54935700  | 4.69539700  |
| H | -1.59991800 | 3.74655700  | 3.03410800  |
| H | 0.04689000  | 3.52171700  | 2.46055400  |
| H | -1.31051100 | 3.19130700  | 1.37517600  |
| C | 4.97269500  | 3.75599300  | -0.74512500 |
| C | 5.44340600  | 3.61310500  | -2.20436600 |
| C | 3.64593100  | 4.52530100  | -0.75870700 |
| C | 5.99129600  | 4.59562900  | 0.04779900  |
| H | 6.40198200  | 3.09642700  | -2.24854300 |
| H | 4.70833900  | 3.04705200  | -2.78694100 |
| H | 5.54961200  | 4.60405500  | -2.66124600 |
| H | 3.26255400  | 4.69125600  | 0.25427500  |
| H | 3.80297000  | 5.50485900  | -1.22158800 |
| H | 2.87797100  | 4.00051900  | -1.33803800 |
| H | 6.10737700  | 5.58099600  | -0.41883200 |
| H | 5.64220600  | 4.74474300  | 1.07534200  |
| H | 6.95926000  | 4.09567200  | 0.07231200  |
| C | 7.02094000  | -0.79688600 | 0.56904200  |
| C | 7.56938400  | -1.03053400 | -0.85121700 |
| C | 8.12724300  | -0.19382000 | 1.45423000  |
| C | 6.65051900  | -2.16490600 | 1.15404900  |
| H | 6.80458500  | -1.49331000 | -1.48536600 |
| H | 7.87593900  | -0.08774100 | -1.30362600 |
| H | 8.43066400  | -1.70766100 | -0.81220900 |
| H | 7.76115700  | -0.05535400 | 2.47721800  |
| H | 8.98822500  | -0.87174400 | 1.48952700  |
| H | 8.44897600  | 0.77005400  | 1.06050800  |
| H | 7.53543700  | -2.80916600 | 1.15165900  |
| H | 6.30031500  | -2.08491200 | 2.18875000  |
| H | 5.87153100  | -2.66365900 | 0.56568000  |
| H | 0.54224800  | -0.11476100 | -0.85931700 |
| H | -5.89980700 | 3.15433100  | -0.81905100 |
| C | -3.50809200 | 2.65185800  | -1.67828600 |
| H | -4.36067400 | 2.61377200  | -2.36644200 |
| H | -2.76877400 | 1.92523200  | -2.01937800 |
| C | -2.88617300 | 4.02859400  | -1.66554700 |
| C | -3.62653800 | 5.16714500  | -1.98769100 |
| C | -1.54876200 | 4.17205000  | -1.28223800 |
| C | -3.04330800 | 6.43077200  | -1.92454200 |
| H | -4.66332100 | 5.06448100  | -2.30032600 |
| C | -0.96555600 | 5.43366500  | -1.21789800 |

|   |             |            |             |
|---|-------------|------------|-------------|
| H | -0.97091700 | 3.28211800 | -1.04113900 |
| C | -1.71291300 | 6.56607900 | -1.53745100 |
| H | -3.62751400 | 7.30825100 | -2.18241300 |
| H | 0.07468200  | 5.53254500 | -0.92340800 |
| H | -1.25753800 | 7.54983700 | -1.48917200 |

**TS3<sup>HCT4</sup>**

|   |             |             |             |
|---|-------------|-------------|-------------|
| C | -4.22903200 | 2.24326700  | 0.58119400  |
| C | -4.81131300 | 3.50950700  | 1.13653900  |
| C | -2.94770000 | 4.65127900  | 0.37579800  |
| C | -2.14023000 | 3.42860000  | -0.11109400 |
| C | -2.60859200 | 0.90658100  | -0.06105700 |
| H | -5.38800700 | 3.27756200  | 2.03327800  |
| H | -1.17717200 | 3.37112100  | 0.39100700  |
| N | -4.79917200 | 1.08550500  | 0.44751500  |
| N | -3.79764300 | 0.25948000  | 0.01054300  |
| N | -2.90614500 | 2.21042000  | 0.22855900  |
| C | -4.12494900 | -1.04307900 | -0.49417300 |
| C | -4.05727400 | -1.23561600 | -1.88183000 |
| C | -4.49846300 | -2.05247900 | 0.39632300  |
| C | -4.29851000 | -2.51833000 | -2.36458300 |
| C | -4.73326800 | -3.31918400 | -0.14282900 |
| C | -4.61228200 | -3.57682900 | -1.50689800 |
| H | -4.24113200 | -2.69571900 | -3.43586200 |
| H | -5.00733300 | -4.12707700 | 0.53102400  |
| O | -3.75075200 | 4.36080100  | 1.50031300  |
| H | -5.47257000 | 3.98905700  | 0.40064700  |
| H | -2.25668100 | 5.44481200  | 0.66183900  |
| C | -3.70249600 | -0.11212400 | -2.82005000 |
| H | -4.17937500 | 0.82612200  | -2.51983000 |
| H | -2.61878500 | 0.05197800  | -2.84241400 |
| H | -4.02485900 | -0.35120700 | -3.83469500 |
| C | -4.79817100 | -4.96912200 | -2.05018900 |
| H | -5.27198200 | -4.95062000 | -3.03454900 |
| H | -3.82777300 | -5.46555100 | -2.15955700 |
| H | -5.40887500 | -5.57910700 | -1.38161900 |
| C | -4.61890500 | -1.80390900 | 1.87197700  |
| H | -3.62974100 | -1.69599800 | 2.33222400  |
| H | -5.18612200 | -0.89190100 | 2.07494900  |
| H | -5.12253800 | -2.64441600 | 2.35359300  |
| C | -1.27093500 | 0.42430200  | -0.35852800 |
| O | -0.32062800 | 1.28250900  | -0.29787800 |
| C | -1.03044000 | -0.92537600 | -0.81983500 |
| C | 0.17140500  | -1.26549200 | -1.33646300 |

|   |             |             |             |
|---|-------------|-------------|-------------|
| H | -1.81281200 | -1.66709900 | -0.71052300 |
| C | 0.53205900  | -2.59123100 | -1.83387000 |
| C | -0.42596200 | -3.57492400 | -2.13081100 |
| C | 1.88814000  | -2.90137100 | -2.02489500 |
| C | -0.03549200 | -4.83713500 | -2.56017800 |
| H | -1.48498800 | -3.34330200 | -2.03938000 |
| C | 2.27667300  | -4.16584200 | -2.45624400 |
| H | 2.63881400  | -2.13955200 | -1.82294300 |
| C | 1.31675200  | -5.14163900 | -2.71773200 |
| H | -0.78921000 | -5.58662400 | -2.78131300 |
| H | 3.33068300  | -4.38670300 | -2.59799200 |
| H | 1.61874300  | -6.12762300 | -3.05520900 |
| H | 0.37790200  | 0.92270600  | 0.90545700  |
| C | -0.44759800 | -0.07541000 | 2.58004800  |
| C | 0.75901500  | 0.36523500  | 1.92582400  |
| C | 1.72190800  | -0.63356700 | 1.39879200  |
| C | 1.30500000  | -2.01426500 | 1.42235600  |
| C | 0.15195200  | -2.44928600 | 1.98977700  |
| C | -0.77363900 | -1.47970900 | 2.64922300  |
| H | 1.25133400  | 1.19727300  | 2.43133900  |
| H | 1.93920000  | -2.73728600 | 0.92861300  |
| C | 2.92772000  | -0.24145800 | 0.82970600  |
| C | 3.90456900  | -1.19601400 | 0.36271300  |
| C | 3.24099800  | 1.15323500  | 0.62942100  |
| C | 5.02443600  | -0.85170900 | -0.31932000 |
| H | 3.73567600  | -2.24058500 | 0.58777200  |
| C | 4.33953900  | 1.58598900  | -0.03636300 |
| H | 2.53649000  | 1.88410700  | 1.00533900  |
| C | 5.27219000  | 0.58243600  | -0.61544400 |
| O | -1.75117600 | -1.90200500 | 3.30420200  |
| O | 6.22543600  | 0.93292700  | -1.31730400 |
| C | -0.21548500 | -3.93429500 | 2.00368300  |
| C | -1.59593900 | -4.13939400 | 1.35193300  |
| C | 0.79963700  | -4.78778300 | 1.23204100  |
| C | -0.24293100 | -4.44214000 | 3.45949200  |
| H | -2.37076500 | -3.58829400 | 1.88546400  |
| H | -1.57858700 | -3.81557800 | 0.30551600  |
| H | -1.84998400 | -5.20559200 | 1.36408600  |
| H | 1.79662300  | -4.73893900 | 1.68339800  |
| H | 0.47696400  | -5.83307900 | 1.25965400  |
| H | 0.87503400  | -4.48799100 | 0.18142400  |
| H | -0.48152100 | -5.51152200 | 3.46452800  |
| H | 0.73959500  | -4.31346600 | 3.92579500  |
| H | -0.98763600 | -3.90688400 | 4.04695300  |

|   |             |             |             |
|---|-------------|-------------|-------------|
| C | -1.18372800 | 0.89974200  | 3.50497300  |
| C | -2.71884500 | 0.76088500  | 3.45361800  |
| C | -0.72557800 | 0.60668500  | 4.94915500  |
| C | -0.83556400 | 2.35849800  | 3.17051200  |
| H | -3.08075900 | 0.71126300  | 2.42418400  |
| H | -3.05017400 | -0.14411100 | 3.95853700  |
| H | -3.17863600 | 1.63119100  | 3.93550900  |
| H | 0.35530400  | 0.74901700  | 5.05075700  |
| H | -1.22749600 | 1.28762400  | 5.64655300  |
| H | -0.97504500 | -0.42104400 | 5.22264000  |
| H | -1.47967500 | 3.03295900  | 3.74143100  |
| H | 0.19942400  | 2.61330300  | 3.41462600  |
| H | -0.99196000 | 2.55574500  | 2.10804600  |
| C | 4.63613000  | 3.07143200  | -0.24688300 |
| C | 4.57944800  | 3.40803500  | -1.74832800 |
| C | 3.61721700  | 3.95909100  | 0.47721200  |
| C | 6.02932600  | 3.41612600  | 0.31281200  |
| H | 5.32055900  | 2.83525700  | -2.30589600 |
| H | 3.58497400  | 3.18687600  | -2.15289100 |
| H | 4.77990600  | 4.47612800  | -1.89481500 |
| H | 3.61413600  | 3.77381800  | 1.55665800  |
| H | 3.87936900  | 5.01009300  | 0.31896900  |
| H | 2.59955100  | 3.81253900  | 0.09944800  |
| H | 6.21808000  | 4.48802600  | 0.18794600  |
| H | 6.07949300  | 3.18609900  | 1.38225300  |
| H | 6.81072900  | 2.86057000  | -0.20432800 |
| C | 6.02614000  | -1.89325100 | -0.82120200 |
| C | 6.04676800  | -1.88650000 | -2.36121800 |
| C | 7.43441200  | -1.58769400 | -0.27902100 |
| C | 5.64827100  | -3.30674400 | -0.36269800 |
| H | 5.05759400  | -2.14243100 | -2.75899100 |
| H | 6.33674800  | -0.90784300 | -2.74400700 |
| H | 6.76075100  | -2.63392800 | -2.72477400 |
| H | 7.43322200  | -1.59753600 | 0.81595100  |
| H | 8.13427700  | -2.35681000 | -0.62365700 |
| H | 7.78698000  | -0.61566900 | -0.62222200 |
| H | 6.38602000  | -4.01740700 | -0.74700900 |
| H | 5.63906400  | -3.39041300 | 0.72928000  |
| H | 4.66511200  | -3.61165400 | -0.73894500 |
| H | 0.94312000  | -0.49895100 | -1.37729000 |
| H | -3.58270300 | 5.02508500  | -0.44284600 |
| C | -1.90741200 | 3.49687900  | -1.62897000 |
| H | -2.87413300 | 3.62867200  | -2.13010500 |
| H | -1.47387900 | 2.55027500  | -1.95999500 |

|   |             |            |             |
|---|-------------|------------|-------------|
| C | -0.96611800 | 4.62790200 | -1.96453100 |
| C | -1.43445000 | 5.85731500 | -2.43035400 |
| C | 0.40776100  | 4.45331800 | -1.76629200 |
| C | -0.54699500 | 6.89948500 | -2.69151600 |
| H | -2.49924000 | 5.99739700 | -2.60123600 |
| C | 1.29458400  | 5.49307000 | -2.02670300 |
| H | 0.76936500  | 3.48708200 | -1.41669500 |
| C | 0.81795600  | 6.71959600 | -2.48803300 |
| H | -0.92290900 | 7.84927800 | -3.05825700 |
| H | 2.35934900  | 5.34389100 | -1.87463800 |
| H | 1.51066000  | 7.52926300 | -2.69340700 |

**TS3<sup>HCT5</sup>**

|   |            |             |             |
|---|------------|-------------|-------------|
| C | 4.25626300 | -1.82487400 | -0.16126900 |
| C | 4.83381400 | -3.11217300 | 0.34698500  |
| C | 2.81253400 | -4.14180000 | -0.07921600 |
| C | 2.01930900 | -2.88638200 | -0.51249200 |
| C | 2.66263200 | -0.40717900 | -0.65673200 |
| H | 5.55394700 | -2.89269100 | 1.13623900  |
| H | 1.16392000 | -2.71027700 | 0.14347900  |
| N | 4.87287200 | -0.69785700 | -0.35900900 |
| N | 3.88514300 | 0.17885800  | -0.69456100 |
| N | 2.91344500 | -1.71851300 | -0.39584900 |
| C | 4.23133900 | 1.47011300  | -1.21813500 |
| C | 3.83495600 | 1.77437800  | -2.53259300 |
| C | 4.93705600 | 2.37476000  | -0.41806800 |
| C | 4.06857200 | 3.06577300  | -2.99192800 |
| C | 5.14043900 | 3.65771900  | -0.93275300 |
| C | 4.69328400 | 4.03098600  | -2.19766000 |
| H | 3.75803200 | 3.32459900  | -4.00114900 |
| H | 5.66994400 | 4.38162900  | -0.31804100 |
| O | 3.79535300 | -3.88294100 | 0.89470000  |
| H | 5.34503500 | -3.65023700 | -0.46471500 |
| H | 2.12030000 | -4.87362600 | 0.33914100  |
| C | 3.17446900 | 0.76623500  | -3.43842100 |
| H | 3.38840000 | 1.01329100  | -4.47958000 |
| H | 3.53633500 | -0.24891200 | -3.25095300 |
| H | 2.08637300 | 0.76676900  | -3.31403800 |
| C | 4.86835100 | 5.43824900  | -2.70313600 |
| H | 5.16156200 | 5.44525700  | -3.75574000 |
| H | 3.92621600 | 5.99067300  | -2.62228900 |
| H | 5.62460600 | 5.97620100  | -2.12849400 |
| C | 5.52335100 | 2.02431800  | 0.92406600  |
| H | 5.36691000 | 2.84187400  | 1.63162500  |



|   |             |             |             |
|---|-------------|-------------|-------------|
| H | 5.10757600  | 1.11207100  | 1.34496000  |
| H | 6.60239400  | 1.87485400  | 0.81715400  |
| C | 1.34804300  | 0.22245800  | -0.79840500 |
| O | 0.33059600  | -0.52883900 | -0.96233800 |
| C | 1.23614500  | 1.65487100  | -0.72181500 |
| C | 0.03319500  | 2.27557200  | -0.77962900 |
| H | 2.12628500  | 2.23466200  | -0.51764000 |
| C | -0.15910600 | 3.70968600  | -0.60750200 |
| C | 0.90486100  | 4.62925200  | -0.65720400 |
| C | -1.45459600 | 4.18885100  | -0.35915400 |
| C | 0.67544100  | 5.97971900  | -0.44101500 |
| H | 1.91112000  | 4.28844500  | -0.88906100 |
| C | -1.67820100 | 5.54349700  | -0.13436700 |
| H | -2.28132400 | 3.48154200  | -0.32859700 |
| C | -0.61516800 | 6.44156800  | -0.17268200 |
| H | 1.50330400  | 6.68037600  | -0.48629200 |
| H | -2.68471600 | 5.89541200  | 0.07164000  |
| H | -0.78923600 | 7.49882000  | -0.00127400 |
| H | -0.63256200 | -0.42964300 | 0.02052600  |
| C | -0.25151400 | -2.36573100 | 2.09063800  |
| C | -1.29377400 | -1.85194600 | 1.40113700  |
| C | -1.39518900 | -0.42364500 | 1.03252200  |
| C | -0.53535600 | 0.45288500  | 1.83761000  |
| C | 0.57432000  | 0.00717600  | 2.46490800  |
| C | 0.89105500  | -1.44234500 | 2.35642000  |
| H | -2.12497900 | -2.48921400 | 1.10677900  |
| H | -0.74728300 | 1.51637400  | 1.80633400  |
| C | -2.70198300 | 0.07381100  | 0.56283900  |
| C | -3.24795700 | 1.29883100  | 1.00693800  |
| C | -3.43747200 | -0.65446000 | -0.40152200 |
| C | -4.44509300 | 1.80112900  | 0.54489900  |
| H | -2.72531100 | 1.84039600  | 1.78806100  |
| C | -4.62712100 | -0.21289600 | -0.93358800 |
| H | -3.01895600 | -1.59872900 | -0.74397600 |
| C | -5.17971300 | 1.07237900  | -0.49309800 |
| O | 2.04800400  | -1.85477100 | 2.44596400  |
| O | -6.24750000 | 1.52383800  | -0.97428400 |
| C | 1.50794200  | 0.91231200  | 3.26471800  |
| C | 2.86644200  | 1.04895300  | 2.56259000  |
| C | 0.91376100  | 2.31638100  | 3.42326100  |
| C | 1.71478900  | 0.30492900  | 4.66352700  |
| H | 3.32469400  | 0.06962700  | 2.40290900  |
| H | 2.74436900  | 1.54898400  | 1.59441000  |
| H | 3.54026100  | 1.66210400  | 3.17201000  |

|   |             |             |             |
|---|-------------|-------------|-------------|
| H | -0.06824300 | 2.28510100  | 3.90683200  |
| H | 1.57893600  | 2.92362600  | 4.04447200  |
| H | 0.80796400  | 2.82254600  | 2.45659600  |
| H | 2.35664300  | 0.95843500  | 5.26330000  |
| H | 0.75661200  | 0.19812300  | 5.18235300  |
| H | 2.18891600  | -0.67676200 | 4.59730100  |
| C | -0.29294600 | -3.80353500 | 2.63846700  |
| C | -0.73764100 | -4.80022700 | 1.55744000  |
| C | 1.03685400  | -4.29300900 | 3.23198100  |
| C | -1.33753400 | -3.81412400 | 3.77229600  |
| H | -1.73619900 | -4.57823100 | 1.17159400  |
| H | -0.05504500 | -4.80745300 | 0.70084500  |
| H | -0.76625000 | -5.80997700 | 1.98038700  |
| H | 1.36509500  | -3.65814100 | 4.05853800  |
| H | 0.88541800  | -5.30652800 | 3.61885700  |
| H | 1.84710400  | -4.30763200 | 2.50131900  |
| H | -1.40814800 | -4.81489900 | 4.21203700  |
| H | -1.05793900 | -3.11038200 | 4.56291600  |
| H | -2.32589500 | -3.52941100 | 3.39965400  |
| C | -5.39427100 | -1.00918400 | -1.99085900 |
| C | -5.46622900 | -0.20114700 | -3.29911900 |
| C | -4.71885600 | -2.34817200 | -2.29933200 |
| C | -6.81905700 | -1.32007300 | -1.49448600 |
| H | -5.95440900 | 0.75774100  | -3.12526900 |
| H | -4.45892200 | -0.02287300 | -3.69103000 |
| H | -6.03115800 | -0.75992400 | -4.05452600 |
| H | -4.67467900 | -2.97822800 | -1.40329800 |
| H | -5.29861600 | -2.88446100 | -3.05738800 |
| H | -3.70224100 | -2.21880000 | -2.68819600 |
| H | -7.35595600 | -1.90354300 | -2.25164300 |
| H | -6.78050600 | -1.91275500 | -0.57400100 |
| H | -7.36576500 | -0.39893100 | -1.29773600 |
| C | -5.06104700 | 3.08054800  | 1.11808200  |
| C | -5.26296600 | 4.12804000  | 0.00588100  |
| C | -6.42611500 | 2.75280300  | 1.75269400  |
| C | -4.18316700 | 3.70856200  | 2.20825000  |
| H | -4.31096500 | 4.37591500  | -0.47637200 |
| H | -5.94357100 | 3.74629800  | -0.75396000 |
| H | -5.67612900 | 5.04936700  | 0.43379200  |
| H | -6.30238700 | 2.03731600  | 2.57259600  |
| H | -6.87589700 | 3.66508100  | 2.16202000  |
| H | -7.09978800 | 2.32663500  | 1.00911200  |
| H | -4.66995200 | 4.61460400  | 2.58365500  |
| H | -4.04461800 | 3.02981200  | 3.05660000  |

|   |             |             |             |
|---|-------------|-------------|-------------|
| H | -3.19410000 | 3.99428000  | 1.83283800  |
| H | -0.86552100 | 1.67395500  | -0.92087100 |
| H | 3.29133900  | -4.58793500 | -0.96546500 |
| C | 1.54369400  | -3.05642400 | -1.96798900 |
| H | 2.39408700  | -3.37542000 | -2.58251900 |
| H | 1.18495200  | -2.09914800 | -2.34695400 |
| C | 0.42822200  | -4.07281200 | -2.01750800 |
| C | 0.68992400  | -5.43300300 | -2.19690600 |
| C | -0.88961300 | -3.65697800 | -1.80618200 |
| C | -0.34225200 | -6.36680700 | -2.14525300 |
| H | 1.70807100  | -5.76572700 | -2.38430200 |
| C | -1.92240800 | -4.58838300 | -1.76292500 |
| H | -1.09267300 | -2.59548200 | -1.67428400 |
| C | -1.65018200 | -5.94560400 | -1.92315700 |
| H | -0.12460600 | -7.42086500 | -2.28474800 |
| H | -2.94205600 | -4.25540100 | -1.60110600 |
| H | -2.45689800 | -6.67020800 | -1.88253900 |

**TS3'**

|   |             |             |             |
|---|-------------|-------------|-------------|
| C | 0.85126000  | -3.39225200 | -0.26707300 |
| C | 1.23645600  | -4.32799700 | -1.41016100 |
| H | 1.35377900  | -2.43015800 | -0.38579800 |
| H | 1.15590500  | -3.81551400 | -2.37946800 |
| N | -0.59965900 | -3.13791800 | -0.42272000 |
| O | 0.41053400  | -5.48196600 | -1.38601400 |
| C | -1.42216600 | -3.95711500 | -1.15402600 |
| C | -0.89478900 | -5.19504700 | -1.82443200 |
| H | -1.52769200 | -6.05072300 | -1.58319600 |
| H | -0.92108600 | -5.03557200 | -2.91201500 |
| N | -2.62301000 | -3.47525700 | -1.24624900 |
| C | -1.34440100 | -2.06506000 | -0.04143500 |
| N | -2.57311000 | -2.30528400 | -0.54035500 |
| C | -3.73527400 | -1.46827400 | -0.45854500 |
| C | -4.51229600 | -1.50893000 | 0.69790800  |
| C | -3.98256000 | -0.59607000 | -1.52383400 |
| C | -5.58304500 | -0.61716300 | 0.77661200  |
| C | -5.05385900 | 0.28112200  | -1.39289500 |
| C | -5.85930100 | 0.28720200  | -0.24910000 |
| H | -6.20314900 | -0.61923800 | 1.66901700  |
| H | -5.25513000 | 0.98880500  | -2.19301300 |
| H | 2.26523000  | -4.66366500 | -1.26677300 |
| C | 1.17663900  | -4.01477400 | 1.09644700  |
| H | 0.64070600  | -3.45960500 | 1.86932100  |
| H | 0.82358400  | -5.05100400 | 1.10538500  |

|   |              |              |              |
|---|--------------|--------------|--------------|
| C | 2. 66627600  | -3. 94991100 | 1. 34387500  |
| C | 3. 29033700  | -2. 70412100 | 1. 47756400  |
| C | 3. 44784600  | -5. 10397000 | 1. 40452000  |
| C | 4. 66392000  | -2. 61065000 | 1. 67386800  |
| H | 2. 68638700  | -1. 80060500 | 1. 41849800  |
| C | 4. 82535900  | -5. 01607000 | 1. 60370100  |
| H | 2. 97482400  | -6. 07681500 | 1. 29493500  |
| C | 5. 43428900  | -3. 77202600 | 1. 73795000  |
| H | 5. 11976500  | -1. 63043800 | 1. 77473100  |
| H | 5. 42108900  | -5. 92230800 | 1. 65000600  |
| H | 6. 50667200  | -3. 70518300 | 1. 89099800  |
| C | -6. 98268600 | 1. 28253100  | -0. 12481100 |
| H | -6. 58439600 | 2. 30106800  | -0. 08120900 |
| H | -7. 65060400 | 1. 23011700  | -0. 98888800 |
| H | -7. 57161700 | 1. 10704200  | 0. 77740300  |
| C | -4. 16953200 | -2. 44267700 | 1. 82676800  |
| H | -3. 99162500 | -3. 45787900 | 1. 46091600  |
| H | -3. 26007300 | -2. 10675300 | 2. 33761500  |
| H | -4. 97643900 | -2. 47372200 | 2. 56002700  |
| C | -3. 08317800 | -0. 59368600 | -2. 72868600 |
| H | -2. 03552600 | -0. 50579600 | -2. 42261000 |
| H | -3. 18883400 | -1. 52426800 | -3. 29458300 |
| H | -3. 31707000 | 0. 24695800  | -3. 38290100 |
| C | -0. 96844600 | 1. 48285500  | 1. 27383500  |
| C | -1. 52862800 | 0. 27026400  | 0. 75219600  |
| H | -0. 06613600 | 1. 34878500  | 1. 87351700  |
| C | -1. 88371400 | 2. 48568200  | 1. 88204300  |
| C | -1. 32809100 | 3. 53739900  | 2. 62266300  |
| C | -3. 27558300 | 2. 45473700  | 1. 71762600  |
| C | -2. 13356500 | 4. 53005100  | 3. 16949700  |
| H | -0. 25005900 | 3. 57993800  | 2. 73675700  |
| C | -4. 07972000 | 3. 44614300  | 2. 26927500  |
| H | -3. 74963200 | 1. 64766400  | 1. 16529400  |
| C | -3. 51496300 | 4. 49149700  | 2. 99639400  |
| H | -1. 67850800 | 5. 33812700  | 3. 73441500  |
| H | -5. 15679000 | 3. 39640900  | 2. 13593500  |
| H | -4. 14516100 | 5. 26246500  | 3. 42832300  |
| C | -0. 87898300 | -0. 92369100 | 0. 70114100  |
| O | 0. 34419400  | -1. 13434300 | 1. 30864000  |
| H | 0. 34287200  | -0. 65482600 | 2. 14836400  |
| H | -2. 49013700 | 0. 33687100  | 0. 26416600  |
| C | 0. 80330500  | 1. 29197100  | -0. 77576000 |
| C | 0. 56024400  | 0. 56591300  | -1. 92780700 |
| H | -0. 26675200 | 0. 73041300  | -2. 60188200 |

|   |              |              |              |
|---|--------------|--------------|--------------|
| C | 1. 62616300  | -0. 35540800 | -2. 09560200 |
| H | 1. 76804900  | -1. 04823300 | -2. 91318200 |
| C | 2. 48658900  | -0. 16809300 | -1. 03817600 |
| H | 3. 41964800  | -0. 65322300 | -0. 78314800 |
| N | 1. 98871600  | 0. 83459900  | -0. 24870000 |
| C | 0. 02106700  | 2. 40350900  | -0. 12738900 |
| O | 0. 65538100  | 3. 35271600  | 0. 43759700  |
| C | -1. 10438400 | 2. 90166000  | -1. 06350500 |
| F | -1. 75688100 | 3. 93747600  | -0. 54428500 |
| F | -2. 02919000 | 1. 96043800  | -1. 37770600 |
| F | -0. 58310900 | 3. 31327500  | -2. 23550200 |
| C | 2. 62175100  | 1. 24100500  | 0. 99532000  |
| H | 2. 14985700  | 2. 17332500  | 1. 31700900  |
| H | 2. 50036600  | 0. 46608100  | 1. 75934300  |
| C | 4. 12143200  | 1. 43228100  | 0. 78591600  |
| O | 4. 90637200  | 0. 71500400  | 1. 37958100  |
| C | 4. 58358200  | 2. 48397300  | -0. 16355700 |
| C | 5. 94238600  | 2. 51073000  | -0. 49731200 |
| C | 3. 70694900  | 3. 43322400  | -0. 70189100 |
| C | 6. 42648100  | 3. 47567200  | -1. 36913100 |
| H | 6. 59940200  | 1. 76554700  | -0. 06078700 |
| C | 4. 20266300  | 4. 40210000  | -1. 57097800 |
| H | 2. 64970400  | 3. 43610000  | -0. 43798500 |
| C | 5. 55384100  | 4. 42275400  | -1. 90702400 |
| H | 7. 47950900  | 3. 49391800  | -1. 63089600 |
| H | 3. 52676800  | 5. 14232700  | -1. 98603600 |
| H | 5. 93074900  | 5. 17831900  | -2. 58956600 |

### M3'

|   |              |             |              |
|---|--------------|-------------|--------------|
| C | 0. 64488700  | 3. 46058000 | 0. 29678300  |
| C | 0. 93960300  | 4. 47860600 | 1. 39461300  |
| H | 1. 19265900  | 2. 53424900 | 0. 48261700  |
| H | 0. 82857000  | 4. 02430400 | 2. 38954400  |
| N | -0. 79991000 | 3. 14709600 | 0. 42824400  |
| O | 0. 07663200  | 5. 59701800 | 1. 25596900  |
| C | -1. 69264400 | 3. 99477900 | 1. 02956100  |
| C | -1. 24427500 | 5. 29660900 | 1. 63458400  |
| H | -1. 88705600 | 6. 11000800 | 1. 29351700  |
| H | -1. 33480400 | 5. 21348400 | 2. 72705800  |
| N | -2. 88381300 | 3. 47390000 | 1. 08163000  |
| C | -1. 48439700 | 2. 02684700 | 0. 09983200  |
| N | -2. 74504300 | 2. 25282500 | 0. 49015300  |
| C | -3. 87985600 | 1. 37234500 | 0. 39076000  |
| C | -4. 57059700 | 1. 30603300 | -0. 81731700 |

|   |             |             |             |
|---|-------------|-------------|-------------|
| C | -4.20501000 | 0.60386000  | 1.51367600  |
| C | -5.65026700 | 0.42266600  | -0.88179800 |
| C | -5.28757800 | -0.26151600 | 1.39667900  |
| C | -6.02014500 | -0.36343500 | 0.20883000  |
| H | -6.20628900 | 0.34325900  | -1.81204200 |
| H | -5.55932000 | -0.88122500 | 2.24728400  |
| H | 1.96240800  | 4.84167400  | 1.28227600  |
| C | 0.97160900  | 4.01316300  | -1.10157100 |
| H | 0.43123300  | 3.42317500  | -1.84423700 |
| H | 0.62450500  | 5.04997900  | -1.15768600 |
| C | 2.45828700  | 3.91725500  | -1.35485400 |
| C | 3.00711700  | 2.71005200  | -1.79893600 |
| C | 3.31460400  | 4.98981400  | -1.09826700 |
| C | 4.38093200  | 2.56418900  | -1.96383900 |
| H | 2.34107400  | 1.88180700  | -2.02442500 |
| C | 4.69123800  | 4.85319600  | -1.27026000 |
| H | 2.89982700  | 5.94018200  | -0.76891700 |
| C | 5.22669600  | 3.63997400  | -1.69468000 |
| H | 4.78437500  | 1.60867300  | -2.28910300 |
| H | 5.34469300  | 5.69634200  | -1.07009500 |
| H | 6.29907200  | 3.53285600  | -1.82096100 |
| C | -7.17237900 | -1.32901800 | 0.11711300  |
| H | -6.82241900 | -2.35616100 | 0.25682200  |
| H | -7.91241700 | -1.12701900 | 0.89640300  |
| H | -7.66871800 | -1.26464400 | -0.85292500 |
| C | -4.13750800 | 2.12063600  | -2.00562800 |
| H | -3.98235800 | 3.16884900  | -1.73458800 |
| H | -3.19606200 | 1.73322900  | -2.41118800 |
| H | -4.88728800 | 2.07535000  | -2.79625400 |
| C | -3.36561900 | 0.67419100  | 2.76117200  |
| H | -2.35200600 | 0.30619900  | 2.56071600  |
| H | -3.28555000 | 1.70108700  | 3.12869700  |
| H | -3.79521700 | 0.05388800  | 3.54824200  |
| C | -0.83621300 | -1.61956900 | -0.92393400 |
| C | -1.46146900 | -0.38640600 | -0.39154600 |
| H | -0.14696400 | -1.35218100 | -1.73430400 |
| C | -1.84796500 | -2.60902400 | -1.47273800 |
| C | -1.38584100 | -3.70807600 | -2.20776500 |
| C | -3.22648300 | -2.46260900 | -1.29317200 |
| C | -2.27778200 | -4.63807900 | -2.72902200 |
| H | -0.31561900 | -3.83218400 | -2.32183700 |
| C | -4.11981300 | -3.39162000 | -1.82328700 |
| H | -3.63521500 | -1.61284200 | -0.75470100 |
| C | -3.65061000 | -4.48605300 | -2.54090000 |

|   |             |             |             |
|---|-------------|-------------|-------------|
| H | -1.89785400 | -5.48696000 | -3.28958100 |
| H | -5.18716000 | -3.24788200 | -1.67867500 |
| H | -4.34581100 | -5.20920700 | -2.95598900 |
| C | -0.92565900 | 0.83759800  | -0.52780900 |
| O | 0.23434600  | 1.10244300  | -1.20545200 |
| H | 0.91440500  | 0.47690900  | -0.89763000 |
| H | -2.33840700 | -0.48874700 | 0.23202400  |
| C | 1.12293400  | -1.19755700 | 0.67995800  |
| C | 1.03583200  | -0.41358900 | 1.81281400  |
| H | 0.27689900  | -0.51019700 | 2.57528400  |
| C | 2.11885600  | 0.50738000  | 1.80474800  |
| H | 2.35640900  | 1.24413200  | 2.55983000  |
| C | 2.83880500  | 0.27333100  | 0.65933500  |
| H | 3.73878800  | 0.73057200  | 0.27198900  |
| N | 2.22884300  | -0.75318800 | -0.03152700 |
| C | 0.22929300  | -2.32490900 | 0.13357100  |
| O | 0.88904900  | -3.30789000 | -0.44921800 |
| C | -0.58494400 | -2.88155300 | 1.32476800  |
| F | -1.32495300 | -3.93279100 | 0.97370600  |
| F | -1.44677100 | -1.97444600 | 1.87393800  |
| F | 0.21960300  | -3.28045700 | 2.32199700  |
| C | 2.81463400  | -1.34060900 | -1.23918300 |
| H | 2.26902500  | -2.27580100 | -1.41929100 |
| H | 2.71572400  | -0.65641800 | -2.08887000 |
| C | 4.30632500  | -1.57639200 | -1.02602500 |
| O | 5.11302600  | -0.98403000 | -1.72074400 |
| C | 4.73155000  | -2.50449800 | 0.06062900  |
| C | 6.08368300  | -2.51088700 | 0.42263600  |
| C | 3.82372900  | -3.35691700 | 0.70094900  |
| C | 6.53166000  | -3.35946300 | 1.42516700  |
| H | 6.76421700  | -1.84264700 | -0.09528000 |
| C | 4.28589900  | -4.20892500 | 1.70218500  |
| H | 2.76933500  | -3.38419200 | 0.41414100  |
| C | 5.62944200  | -4.20978200 | 2.06648700  |
| H | 7.57941200  | -3.36283700 | 1.70831800  |
| H | 3.58620000  | -4.87452300 | 2.19731500  |
| H | 5.97845500  | -4.87577500 | 2.84989000  |

### M3<sup>SET</sup>

|   |             |             |            |
|---|-------------|-------------|------------|
| C | -3.03591000 | -0.59486200 | 0.40442400 |
| C | -4.10566200 | -1.67648000 | 0.55718200 |
| H | -2.99722100 | 0.01140200  | 1.30933600 |
| H | -4.01173700 | -2.17537400 | 1.53156000 |
| N | -1.73740700 | -1.30207900 | 0.26970200 |

|   |             |             |             |
|---|-------------|-------------|-------------|
| O | -4.00449900 | -2.62055800 | -0.49282600 |
| C | -1.65054800 | -2.60608500 | -0.14329200 |
| C | -2.88106000 | -3.44862000 | -0.31592300 |
| H | -2.77152900 | -4.07724100 | -1.20043800 |
| H | -2.99988600 | -4.09499000 | 0.56552700  |
| N | -0.41625500 | -2.97113200 | -0.33123600 |
| C | -0.46378300 | -0.81928000 | 0.30599200  |
| N | 0.31873200  | -1.86661200 | -0.03480400 |
| C | 1.75299300  | -1.91421100 | -0.11430100 |
| C | 2.33446500  | -1.87371200 | -1.38296200 |
| C | 2.48845600  | -1.93964700 | 1.07470100  |
| C | 3.72747600  | -1.82873700 | -1.44109500 |
| C | 3.87471200  | -1.88698200 | 0.96000800  |
| C | 4.50921400  | -1.82182600 | -0.28404700 |
| H | 4.21048000  | -1.79005400 | -2.41376900 |
| H | 4.47652600  | -1.89588200 | 1.86514700  |
| H | -5.09082500 | -1.21287300 | 0.48863800  |
| C | -3.25264200 | 0.28716800  | -0.83368700 |
| H | -2.38226600 | 0.94221900  | -0.94951200 |
| H | -3.30312200 | -0.36552600 | -1.71105200 |
| C | -4.51205200 | 1.10806500  | -0.71082700 |
| C | -4.54847700 | 2.21795700  | 0.13756000  |
| C | -5.66645600 | 0.75200900  | -1.41069600 |
| C | -5.71460000 | 2.96309200  | 0.27852300  |
| H | -3.65288100 | 2.50125900  | 0.68633900  |
| C | -6.83493500 | 1.49708000  | -1.27272800 |
| H | -5.64708500 | -0.11384500 | -2.06785100 |
| C | -6.86062600 | 2.60396400  | -0.42868600 |
| H | -5.72910000 | 3.82676500  | 0.93523900  |
| H | -7.72365100 | 1.21379400  | -1.82690800 |
| H | -7.76986000 | 3.18642600  | -0.32319000 |
| C | 6.00979100  | -1.72928900 | -0.36190500 |
| H | 6.35758700  | -0.79134300 | 0.08243800  |
| H | 6.48020700  | -2.54667600 | 0.19088000  |
| H | 6.35784700  | -1.76866000 | -1.39540000 |
| C | 1.48644400  | -1.85301400 | -2.62662400 |
| H | 0.95206600  | -2.79928600 | -2.74877700 |
| H | 0.73546800  | -1.05641400 | -2.58245800 |
| H | 2.10515200  | -1.68868200 | -3.50931000 |
| C | 1.81097200  | -1.98026700 | 2.41769700  |
| H | 1.41869100  | -0.99342000 | 2.68919600  |
| H | 0.97735500  | -2.68778100 | 2.42341400  |
| H | 2.51930600  | -2.27959600 | 3.19110700  |
| C | 1.72401000  | 2.15855900  | 1.00332500  |



|   |              |             |              |
|---|--------------|-------------|--------------|
| C | 1. 24309300  | 1. 00888000 | 0. 43232600  |
| H | 1. 10517000  | 2. 70774800 | 1. 71199300  |
| C | 3. 04929600  | 2. 70672000 | 0. 78956900  |
| C | 3. 38036300  | 3. 92058300 | 1. 41574800  |
| C | 4. 02346600  | 2. 06834800 | -0. 00277000 |
| C | 4. 63722100  | 4. 48705800 | 1. 25192100  |
| H | 2. 63735600  | 4. 41822200 | 2. 03290800  |
| C | 5. 27749500  | 2. 63699100 | -0. 16267300 |
| H | 3. 80868900  | 1. 12002700 | -0. 48790300 |
| C | 5. 58898400  | 3. 84721200 | 0. 46122000  |
| H | 4. 87513200  | 5. 42555200 | 1. 74074300  |
| H | 6. 01986500  | 2. 13692700 | -0. 77604900 |
| H | 6. 57228000  | 4. 28668400 | 0. 33133400  |
| C | -0. 05090200 | 0. 50537900 | 0. 65759000  |
| O | -1. 01830000 | 1. 22792600 | 1. 26959900  |
| H | -0. 82743800 | 2. 17237800 | 1. 17908600  |
| H | 1. 88483400  | 0. 43933100 | -0. 22615600 |

**M3<sup>HAT</sup>**

|   |              |              |              |
|---|--------------|--------------|--------------|
| C | -3. 02815700 | -0. 65040900 | 0. 40671200  |
| C | -4. 06966000 | -1. 69145400 | 0. 80670200  |
| H | -2. 98623800 | 0. 15854700  | 1. 13653100  |
| H | -3. 95588000 | -1. 96724300 | 1. 86520400  |
| N | -1. 72588200 | -1. 33160200 | 0. 41938200  |
| O | -3. 95931800 | -2. 84546900 | -0. 01328300 |
| C | -1. 58981200 | -2. 68225200 | 0. 26192400  |
| C | -2. 79469900 | -3. 57800600 | 0. 29154700  |
| H | -2. 68552700 | -4. 36992100 | -0. 45062200 |
| H | -2. 87554200 | -4. 03794300 | 1. 28772600  |
| N | -0. 35136700 | -3. 04533200 | 0. 14263700  |
| C | -0. 46194500 | -0. 78139600 | 0. 39128900  |
| N | 0. 35847200  | -1. 86699300 | 0. 22003200  |
| C | 1. 75844600  | -1. 88678000 | -0. 06330200 |
| C | 2. 20235700  | -1. 43031300 | -1. 30930100 |
| C | 2. 63079400  | -2. 32919500 | 0. 93388200  |
| C | 3. 57750200  | -1. 39811200 | -1. 52985400 |
| C | 3. 99797300  | -2. 28584100 | 0. 66402300  |
| C | 4. 48767800  | -1. 81731100 | -0. 55643300 |
| H | 3. 94801300  | -1. 03240100 | -2. 48459400 |
| H | 4. 69640900  | -2. 61377600 | 1. 42992600  |
| H | -5. 06908400 | -1. 28017100 | 0. 65151300  |
| C | -3. 29219100 | -0. 07083700 | -0. 99200200 |
| H | -2. 38813800 | 0. 45888700  | -1. 30380100 |
| H | -3. 47258400 | -0. 90192400 | -1. 68259200 |

|   |             |             |             |
|---|-------------|-------------|-------------|
| C | -4.46050600 | 0.88141000  | -0.97216600 |
| C | -4.29753700 | 2.15456800  | -0.41447200 |
| C | -5.71300900 | 0.50992800  | -1.46339400 |
| C | -5.37019800 | 3.03838200  | -0.35716900 |
| H | -3.31734700 | 2.43399300  | -0.03335400 |
| C | -6.78784700 | 1.39533800  | -1.40643800 |
| H | -5.84375100 | -0.47875800 | -1.89757600 |
| C | -6.61786700 | 2.66129900  | -0.85324200 |
| H | -5.23338800 | 4.02573300  | 0.07302400  |
| H | -7.75587100 | 1.09562700  | -1.79574700 |
| H | -7.45320800 | 3.35300600  | -0.80995100 |
| C | 5.96886800  | -1.77451200 | -0.83000500 |
| H | 6.54362300  | -1.82752300 | 0.09702900  |
| H | 6.27132900  | -2.61697800 | -1.46018300 |
| H | 6.24387800  | -0.85622700 | -1.35539800 |
| C | 1.22743400  | -0.94669400 | -2.34815000 |
| H | 0.36393300  | -1.61462600 | -2.42037800 |
| H | 0.85367200  | 0.05052500  | -2.08918900 |
| H | 1.70611800  | -0.88763100 | -3.32697200 |
| C | 2.09613100  | -2.78810100 | 2.26333700  |
| H | 1.52856700  | -1.98582500 | 2.74685500  |
| H | 1.41754600  | -3.63657000 | 2.13914800  |
| H | 2.91040700  | -3.08264500 | 2.92712300  |
| C | 1.55065000  | 2.35113800  | 0.69400500  |
| C | 1.21601600  | 1.04671700  | 0.67916300  |
| H | 0.74558300  | 3.07959400  | 0.61931000  |
| C | 2.91449000  | 2.87284300  | 0.81110500  |
| C | 3.10562300  | 4.23883100  | 1.06428500  |
| C | 4.05271500  | 2.06083600  | 0.66815100  |
| C | 4.38257100  | 4.77497000  | 1.19146200  |
| H | 2.23488100  | 4.88112400  | 1.16651900  |
| C | 5.32746800  | 2.59652000  | 0.79552900  |
| H | 3.93899300  | 1.00481700  | 0.43533500  |
| C | 5.50050800  | 3.95540200  | 1.06083000  |
| H | 4.50505600  | 5.83489700  | 1.39162100  |
| H | 6.19363300  | 1.95158000  | 0.67967000  |
| H | 6.49825100  | 4.37119100  | 1.15765200  |
| C | -0.17728400 | 0.61811700  | 0.55043900  |
| O | -1.14020100 | 1.44037300  | 0.57520800  |
| H | 1.98523300  | 0.29214200  | 0.79344300  |

**M04**

|   |            |            |            |
|---|------------|------------|------------|
| C | 3.95671300 | 0.35074600 | 0.19940000 |
| C | 4.90946600 | 0.46737600 | 1.38464200 |

|   |             |             |             |
|---|-------------|-------------|-------------|
| H | 3.31858200  | -0.52617600 | 0.30977200  |
| H | 4.37289800  | 0.32167000  | 2.33318500  |
| N | 3.06458600  | 1.52963300  | 0.27310700  |
| O | 5.55477800  | 1.73325200  | 1.36768200  |
| C | 3.38374400  | 2.65845100  | 0.97331400  |
| C | 4.67416700  | 2.76607300  | 1.73546600  |
| H | 5.15829000  | 3.71987800  | 1.51849400  |
| H | 4.44265900  | 2.72664300  | 2.80971800  |
| N | 2.41655500  | 3.52894700  | 0.93582600  |
| C | 1.81391600  | 1.70057600  | -0.20123900 |
| N | 1.44872100  | 2.92223600  | 0.19412400  |
| C | 0.18196900  | 3.57984600  | 0.02492100  |
| C | -0.17502100 | 4.04607200  | -1.24097700 |
| C | -0.64049200 | 3.69196300  | 1.15196500  |
| C | -1.45055600 | 4.59449200  | -1.37995400 |
| C | -1.89909300 | 4.25536500  | 0.95688500  |
| C | -2.32904600 | 4.68765800  | -0.30010300 |
| H | -1.76408800 | 4.95079600  | -2.35768600 |
| H | -2.56685900 | 4.34646500  | 1.81041900  |
| H | 5.68517800  | -0.29520600 | 1.29203400  |
| C | 4.70885400  | 0.31386000  | -1.13532300 |
| H | 3.98930800  | 0.47594100  | -1.94110500 |
| H | 5.44217100  | 1.12698400  | -1.15026700 |
| C | 5.38916400  | -1.02397100 | -1.30895200 |
| C | 4.61811500  | -2.19029900 | -1.36024100 |
| C | 6.77898500  | -1.12546500 | -1.38889000 |
| C | 5.23030700  | -3.43147900 | -1.49947700 |
| H | 3.53386900  | -2.12241100 | -1.28871600 |
| C | 7.39206400  | -2.36865300 | -1.53263000 |
| H | 7.38379600  | -0.22330800 | -1.34095700 |
| C | 6.61807600  | -3.52439600 | -1.58961100 |
| H | 4.61878900  | -4.32811200 | -1.53268100 |
| H | 8.47368300  | -2.43289200 | -1.59796000 |
| H | 7.09366800  | -4.49364100 | -1.70101800 |
| C | -3.72543900 | 5.22234200  | -0.47845700 |
| H | -4.45227500 | 4.40476300  | -0.42462400 |
| H | -3.97722400 | 5.93717400  | 0.30908200  |
| H | -3.84377900 | 5.71543400  | -1.44508800 |
| C | 0.74874000  | 3.91228200  | -2.42211700 |
| H | 1.78392700  | 4.13501000  | -2.15020000 |
| H | 0.71658400  | 2.89497800  | -2.82956100 |
| H | 0.44729100  | 4.59534000  | -3.21766800 |
| C | -0.19643900 | 3.21013200  | 2.50799200  |
| H | 0.21582300  | 2.19654600  | 2.44719800  |

|   |             |             |             |
|---|-------------|-------------|-------------|
| H | 0.57315800  | 3.87102300  | 2.91700300  |
| H | -1.04463100 | 3.19795800  | 3.19524100  |
| C | -0.95912100 | -0.29948000 | -1.81435000 |
| C | -0.33200200 | 0.77003000  | -1.28369700 |
| H | -0.35161100 | -1.16524000 | -2.06859800 |
| C | -2.39457900 | -0.39657800 | -2.07189600 |
| C | -2.94755600 | -1.65367600 | -2.35004400 |
| C | -3.24093800 | 0.71994600  | -2.02258500 |
| C | -4.31360900 | -1.79706100 | -2.55970800 |
| H | -2.29952400 | -2.52573900 | -2.36472000 |
| C | -4.60457000 | 0.57725100  | -2.24005300 |
| H | -2.82905100 | 1.70486000  | -1.81771600 |
| C | -5.14446200 | -0.67993000 | -2.50652000 |
| H | -4.73256200 | -2.78062600 | -2.74789700 |
| H | -5.25120900 | 1.44796400  | -2.19535300 |
| H | -6.21282200 | -0.79171500 | -2.66068600 |
| C | 1.09176400  | 0.64804900  | -1.01312000 |
| O | 1.78787400  | -0.27496900 | -1.41726300 |
| H | -0.88149100 | 1.63073600  | -0.92919500 |
| C | -3.68008100 | -1.06645200 | 0.96115400  |
| C | -4.50932700 | 0.04404900  | 1.16654400  |
| H | -5.58842900 | 0.02396200  | 1.14451100  |
| C | -3.68577400 | 1.14986300  | 1.36918800  |
| H | -3.98979600 | 2.17130100  | 1.54720500  |
| C | -2.36858600 | 0.70325000  | 1.29414500  |
| H | -1.42752400 | 1.21068500  | 1.41403900  |
| N | -2.35736400 | -0.63220400 | 1.05142900  |
| C | -4.07996900 | -2.41886000 | 0.68647100  |
| C | -1.21580200 | -1.45884500 | 0.96811900  |
| H | -1.44307500 | -2.50784600 | 0.87994800  |
| C | 0.07296500  | -1.01531400 | 1.16255600  |
| O | 0.45051500  | 0.20341300  | 1.33630300  |
| C | 1.14628200  | -2.06665700 | 1.18455400  |
| C | 1.13090200  | -3.21316400 | 0.38248600  |
| C | 2.22188300  | -1.87448800 | 2.05824200  |
| C | 2.16431000  | -4.14354600 | 0.46040900  |
| H | 0.31411300  | -3.36230000 | -0.31833800 |
| C | 3.25662500  | -2.80167600 | 2.13624800  |
| H | 2.22244000  | -0.97745100 | 2.67171800  |
| C | 3.23108700  | -3.94154700 | 1.33466500  |
| H | 2.14269700  | -5.02549000 | -0.17322600 |
| H | 4.07984200  | -2.64064800 | 2.82694600  |
| H | 4.04081900  | -4.66275200 | 1.38449000  |
| C | -5.60625000 | -2.67894000 | 0.79049700  |

|   |             |             |             |
|---|-------------|-------------|-------------|
| F | -6.06345400 | -2.37962600 | 2.01575000  |
| F | -5.88123600 | -3.95710000 | 0.55092500  |
| F | -6.31028300 | -1.94070300 | -0.08391000 |
| O | -3.37920100 | -3.37771300 | 0.40654400  |

**TS4RR**

|   |             |             |             |
|---|-------------|-------------|-------------|
| C | 3.03385500  | 2.00421400  | 0.52493000  |
| C | 3.79271600  | 2.77438900  | 1.60067800  |
| H | 2.87832700  | 0.96517200  | 0.81572000  |
| H | 3.35264600  | 2.59856200  | 2.59304100  |
| N | 1.69361300  | 2.63430100  | 0.44489700  |
| O | 3.79386400  | 4.16273500  | 1.29918000  |
| C | 1.45916100  | 3.92199400  | 0.83548600  |
| C | 2.52802200  | 4.74060400  | 1.50271300  |
| H | 2.54151800  | 5.74831800  | 1.08427400  |
| H | 2.29219000  | 4.80842100  | 2.57487300  |
| N | 0.21997200  | 4.26182500  | 0.62192500  |
| C | 0.52747700  | 2.14014600  | -0.02253300 |
| N | -0.34751300 | 3.14636600  | 0.08810800  |
| C | -1.73356900 | 3.18037700  | -0.30116100 |
| C | -2.04230200 | 3.17788700  | -1.66278400 |
| C | -2.69797400 | 3.18203100  | 0.71158700  |
| C | -3.39233200 | 3.11740100  | -2.00724600 |
| C | -4.03035100 | 3.12644600  | 0.30911600  |
| C | -4.39444200 | 3.06909000  | -1.03793700 |
| H | -3.66319500 | 3.09722400  | -3.05958800 |
| H | -4.80502600 | 3.11161100  | 1.07278900  |
| H | 4.83353300  | 2.44554700  | 1.60873900  |
| C | 3.73602600  | 2.06713800  | -0.83861600 |
| H | 3.01764500  | 1.76039200  | -1.60184100 |
| H | 4.04562300  | 3.09972500  | -1.03126700 |
| C | 4.92155400  | 1.13215500  | -0.84819100 |
| C | 4.70897200  | -0.24823100 | -0.94394800 |
| C | 6.22546100  | 1.61358100  | -0.72350600 |
| C | 5.78821800  | -1.12625800 | -0.92076600 |
| H | 3.69183800  | -0.62409700 | -1.03326700 |
| C | 7.30627300  | 0.73350600  | -0.69914500 |
| H | 6.39463400  | 2.68563900  | -0.65025900 |
| C | 7.08886500  | -0.63750700 | -0.79804500 |
| H | 5.61024000  | -2.19377500 | -1.00699400 |
| H | 8.31589600  | 1.12100400  | -0.60573900 |
| H | 7.92951000  | -1.32381300 | -0.78264500 |
| C | -5.84245500 | 2.92326100  | -1.42406300 |
| H | -6.00127000 | 3.15577000  | -2.47875800 |

|   |             |             |             |
|---|-------------|-------------|-------------|
| H | -6.17320100 | 1.89336800  | -1.25097500 |
| H | -6.47946800 | 3.57733200  | -0.82345200 |
| C | -0.97080700 | 3.18297500  | -2.71968100 |
| H | -0.15066800 | 3.85833200  | -2.46027100 |
| H | -0.55541700 | 2.17751800  | -2.85073900 |
| H | -1.38525600 | 3.50067400  | -3.67757100 |
| C | -2.31640200 | 3.19416200  | 2.16633400  |
| H | -1.78963900 | 2.26678300  | 2.41598300  |
| H | -1.67441300 | 4.04720400  | 2.39982200  |
| H | -3.21252100 | 3.25589100  | 2.78706300  |
| C | -1.09856300 | -1.12645100 | -0.98664000 |
| C | -0.92516700 | 0.21748400  | -0.73120200 |
| H | -0.20660500 | -1.72075600 | -1.17085200 |
| C | -2.37549500 | -1.72443300 | -1.39942300 |
| C | -2.43659600 | -3.10110100 | -1.65560400 |
| C | -3.53861800 | -0.95653500 | -1.56346200 |
| C | -3.62883700 | -3.69706000 | -2.05173300 |
| H | -1.53911600 | -3.69821600 | -1.52459000 |
| C | -4.72986400 | -1.55611000 | -1.95075700 |
| H | -3.51365000 | 0.11626500  | -1.39019100 |
| C | -4.78051500 | -2.92765800 | -2.19663300 |
| H | -3.65837400 | -4.76464800 | -2.24602500 |
| H | -5.62491000 | -0.95124800 | -2.06102700 |
| H | -5.71363500 | -3.39223500 | -2.50046300 |
| C | 0.38460100  | 0.72353100  | -0.55644800 |
| O | 1.45542000  | 0.15337900  | -0.80699300 |
| H | -1.77394600 | 0.83242600  | -0.46903300 |
| C | 1.58146700  | -2.54933200 | 0.87021800  |
| C | 2.80680100  | -2.04587300 | 1.32142900  |
| H | 3.78040300  | -2.40769500 | 1.02562600  |
| C | 2.52882700  | -1.02593100 | 2.23056800  |
| H | 3.24303300  | -0.44351100 | 2.79526300  |
| C | 1.14564100  | -0.90062200 | 2.30293500  |
| H | 0.52567600  | -0.23505800 | 2.87714600  |
| N | 0.56305500  | -1.82358000 | 1.49021600  |
| C | 1.37064200  | -3.63103800 | -0.04297400 |
| O | 0.31130000  | -4.14244000 | -0.37271500 |
| C | 2.66034500  | -4.21137200 | -0.67636100 |
| F | 2.36636100  | -5.16964000 | -1.54580600 |
| F | 3.47150500  | -4.73187700 | 0.25763100  |
| F | 3.35964100  | -3.26439700 | -1.32653300 |
| C | -0.82715300 | -2.00234900 | 1.29409200  |
| H | -1.11584500 | -3.00237000 | 1.01440900  |
| C | -1.72876700 | -1.01573900 | 1.73812300  |

|   |             |             |            |
|---|-------------|-------------|------------|
| O | -1.36766600 | 0.14362300  | 2.06623200 |
| C | -3.19976200 | -1.29994100 | 1.63266600 |
| C | -3.74803500 | -2.57567000 | 1.46126300 |
| C | -4.05954800 | -0.19777900 | 1.66633300 |
| C | -5.11988100 | -2.73553000 | 1.30013700 |
| H | -3.10847400 | -3.45222300 | 1.44874200 |
| C | -5.43184000 | -0.35625000 | 1.50840000 |
| H | -3.61850700 | 0.78289100  | 1.80903700 |
| C | -5.96681200 | -1.62829800 | 1.31974100 |
| H | -5.53034100 | -3.72996000 | 1.15402500 |
| H | -6.08390800 | 0.51287000  | 1.53035300 |
| H | -7.03704700 | -1.76004300 | 1.19193000 |

**TS4RR'**

|   |             |             |             |
|---|-------------|-------------|-------------|
| C | -1.83556200 | 2.90279200  | 0.56881800  |
| C | -2.17496500 | 3.54378900  | 1.90994300  |
| H | -0.78162200 | 2.62586800  | 0.52720500  |
| H | -1.76324000 | 2.94402600  | 2.73322900  |
| N | -2.60556300 | 1.64249800  | 0.53183500  |
| O | -3.58578800 | 3.67755700  | 2.04002400  |
| C | -3.75665300 | 1.43026200  | 1.23730500  |
| C | -4.22225200 | 2.44010200  | 2.24844900  |
| H | -5.29897900 | 2.59255300  | 2.16136700  |
| H | -4.00283700 | 2.04697000  | 3.25195700  |
| N | -4.26982700 | 0.26239300  | 0.96731900  |
| C | -2.37174300 | 0.53242600  | -0.18398300 |
| N | -3.39252000 | -0.28533100 | 0.07446900  |
| C | -3.71594900 | -1.50494000 | -0.61926900 |
| C | -4.10880300 | -1.40124400 | -1.95502400 |
| C | -3.61391900 | -2.72128400 | 0.06266600  |
| C | -4.40948200 | -2.58822400 | -2.62365900 |
| C | -3.92827100 | -3.87422200 | -0.65131700 |
| C | -4.32473400 | -3.82730600 | -1.99115900 |
| H | -4.71799300 | -2.53892800 | -3.66437900 |
| H | -3.85625100 | -4.83585600 | -0.14900500 |
| H | -1.75278800 | 4.54890600  | 1.95264800  |
| C | -2.24149900 | 3.77681100  | -0.62757800 |
| H | -2.25089500 | 3.13978700  | -1.51524600 |
| H | -3.25186000 | 4.16162400  | -0.45304600 |
| C | -1.25971500 | 4.90448400  | -0.82515300 |
| C | -0.05859400 | 4.66175000  | -1.50074300 |
| C | -1.51154200 | 6.18300600  | -0.32461000 |
| C | 0.86743700  | 5.68536500  | -1.67563800 |
| H | 0.12955800  | 3.66567100  | -1.89697400 |

|   |             |             |             |
|---|-------------|-------------|-------------|
| C | -0.58083400 | 7.20655200  | -0.49354700 |
| H | -2.44800800 | 6.37846500  | 0.19308300  |
| C | 0.61000100  | 6.95909500  | -1.16996200 |
| H | 1.78875700  | 5.49500000  | -2.21735400 |
| H | -0.78971300 | 8.19703900  | -0.10209900 |
| H | 1.33343900  | 7.75599200  | -1.30818800 |
| C | -4.65935000 | -5.09909700 | -2.72560600 |
| H | -3.82984000 | -5.80933900 | -2.67042200 |
| H | -5.53482600 | -5.58299300 | -2.28265200 |
| H | -4.87381100 | -4.90503300 | -3.77793200 |
| C | -4.19696000 | -0.06726800 | -2.65096700 |
| H | -4.73382200 | 0.66515800  | -2.03981500 |
| H | -3.20236600 | 0.34013400  | -2.86398700 |
| H | -4.72474800 | -0.16992000 | -3.59987000 |
| C | -3.12732000 | -2.78130300 | 1.48429600  |
| H | -2.06026100 | -2.53478000 | 1.54436900  |
| H | -3.65841900 | -2.07086700 | 2.12281100  |
| H | -3.25949300 | -3.78431700 | 1.89327500  |
| C | 0.74693500  | -1.24745900 | -1.15638300 |
| C | -0.58941300 | -0.99191900 | -0.88219300 |
| H | 1.28796500  | -0.48551900 | -1.71533500 |
| C | 1.30661500  | -2.61209100 | -1.19756500 |
| C | 2.67730800  | -2.78421600 | -1.43813300 |
| C | 0.51487200  | -3.74871400 | -0.98715500 |
| C | 3.24873800  | -4.04847300 | -1.43660800 |
| H | 3.29753600  | -1.90481100 | -1.59602100 |
| C | 1.08707200  | -5.01805200 | -0.98911800 |
| H | -0.55544800 | -3.64565600 | -0.83198100 |
| C | 2.45350400  | -5.17232700 | -1.20692300 |
| H | 4.31477700  | -4.15823100 | -1.60570300 |
| H | 0.46143900  | -5.88919800 | -0.82231500 |
| H | 2.89810100  | -6.16222000 | -1.20263600 |
| C | -1.12931200 | 0.30592600  | -1.01509500 |
| O | -0.70418000 | 1.28449700  | -1.64982400 |
| H | -1.16674500 | -1.72146800 | -0.32750100 |
| C | 4.14677800  | 0.62709900  | -0.15090900 |
| C | 4.47149800  | 1.83230500  | -0.78440800 |
| H | 5.46992100  | 2.14734800  | -1.04792800 |
| C | 3.27944700  | 2.51805900  | -1.02142300 |
| H | 3.16074000  | 3.47702400  | -1.50243400 |
| C | 2.24393400  | 1.72957600  | -0.53293800 |
| H | 1.17552200  | 1.87461900  | -0.55573600 |
| N | 2.75902900  | 0.59533700  | 0.00495900  |
| C | 5.04696600  | -0.41661500 | 0.26329400  |



|   |             |             |             |
|---|-------------|-------------|-------------|
| O | 4.77873300  | -1.50452300 | 0.74532500  |
| C | 6.54747000  | -0.10143700 | 0.03658900  |
| F | 7.30663300  | -1.09576900 | 0.48135900  |
| F | 6.91722600  | 1.02006800  | 0.67117800  |
| F | 6.81326100  | 0.07077600  | -1.26834600 |
| C | 2.02850900  | -0.44364800 | 0.63281200  |
| H | 2.65086000  | -1.28821000 | 0.87644400  |
| C | 0.88242400  | -0.17029700 | 1.41488300  |
| O | 0.19580300  | 0.87057900  | 1.33406800  |
| C | 0.37056800  | -1.27928200 | 2.29261600  |
| C | 0.79408400  | -2.61102900 | 2.19911600  |
| C | -0.60100800 | -0.94418800 | 3.24326200  |
| C | 0.25329100  | -3.58051700 | 3.04063000  |
| H | 1.53743800  | -2.90721900 | 1.46600200  |
| C | -1.11888600 | -1.90701100 | 4.10197400  |
| H | -0.92852700 | 0.08917700  | 3.29357200  |
| C | -0.69591900 | -3.23182300 | 3.99903400  |
| H | 0.58200700  | -4.61081000 | 2.94756800  |
| H | -1.85826400 | -1.62907700 | 4.84695300  |
| H | -1.10437500 | -3.98825000 | 4.66181400  |

**TS4RR''**

|   |             |            |             |
|---|-------------|------------|-------------|
| C | 2.82094000  | 1.52605800 | 0.07485300  |
| C | 3.48093100  | 2.21106800 | 1.26603000  |
| H | 2.55043600  | 0.49915400 | 0.31442900  |
| H | 2.86628300  | 2.06608900 | 2.16445600  |
| N | 1.55434000  | 2.25979600 | -0.13652600 |
| O | 3.65213600  | 3.59524000 | 0.98032400  |
| C | 1.37545000  | 3.56159700 | 0.23135900  |
| C | 2.43445700  | 4.29836200 | 1.00253100  |
| H | 2.60427300  | 5.28489500 | 0.56799600  |
| H | 2.06317600  | 4.42160100 | 2.03001400  |
| N | 0.16881600  | 3.97130000 | -0.04971300 |
| C | 0.38398400  | 1.82685200 | -0.63270600 |
| N | -0.43682600 | 2.87645500 | -0.58568200 |
| C | -1.76802800 | 2.98867300 | -1.12387300 |
| C | -1.90276000 | 3.10033500 | -2.50913400 |
| C | -2.84710800 | 2.99347000 | -0.23814100 |
| C | -3.19626400 | 3.21919900 | -3.01183500 |
| C | -4.11920500 | 3.11457400 | -0.79417300 |
| C | -4.31174600 | 3.22473800 | -2.17251600 |
| H | -3.33527600 | 3.31212000 | -4.08584300 |
| H | -4.98133100 | 3.12016200 | -0.13225000 |
| H | 4.47526200  | 1.79315900 | 1.42839000  |

|   |              |              |              |
|---|--------------|--------------|--------------|
| C | 3. 67117300  | 1. 58283200  | -1. 20036000 |
| H | 3. 04023200  | 1. 27080500  | -2. 03724400 |
| H | 3. 99882400  | 2. 61419600  | -1. 36529300 |
| C | 4. 85058700  | 0. 65367000  | -1. 06253500 |
| C | 4. 64320600  | -0. 72739400 | -1. 13764200 |
| C | 6. 13122800  | 1. 13617700  | -0. 79237500 |
| C | 5. 70049000  | -1. 60909500 | -0. 93771300 |
| H | 3. 64166200  | -1. 09356000 | -1. 36057100 |
| C | 7. 19326300  | 0. 25384100  | -0. 60181100 |
| H | 6. 29475500  | 2. 20937300  | -0. 72738300 |
| C | 6. 97857900  | -1. 11945700 | -0. 67012400 |
| H | 5. 52977600  | -2. 68049800 | -0. 98358000 |
| H | 8. 18634500  | 0. 64075700  | -0. 39618700 |
| H | 7. 80228300  | -1. 80862900 | -0. 51484300 |
| C | -5. 69969100 | 3. 32124100  | -2. 74887000 |
| H | -6. 06669700 | 2. 32806500  | -3. 02677400 |
| H | -6. 40021400 | 3. 74510200  | -2. 02655600 |
| H | -5. 71077000 | 3. 94089000  | -3. 64827100 |
| C | -0. 70099200 | 3. 07884100  | -3. 41621200 |
| H | 0. 08904100  | 3. 74018700  | -3. 04759400 |
| H | -0. 28483100 | 2. 06809400  | -3. 49275700 |
| H | -0. 97626200 | 3. 40144800  | -4. 42108100 |
| C | -2. 64357900 | 2. 80749800  | 1. 24075700  |
| H | -2. 39366600 | 1. 76204900  | 1. 46755900  |
| H | -1. 83159600 | 3. 43019500  | 1. 62251000  |
| H | -3. 55576000 | 3. 04961800  | 1. 78827700  |
| C | -1. 46054600 | -1. 41115100 | -1. 11589900 |
| C | -1. 19346000 | -0. 08597100 | -0. 86369900 |
| H | -0. 69886800 | -1. 98345400 | -1. 64058500 |
| C | -2. 73667500 | -2. 06211900 | -0. 86850500 |
| C | -2. 91404600 | -3. 39629800 | -1. 26479300 |
| C | -3. 79652800 | -1. 40828500 | -0. 21327300 |
| C | -4. 11940000 | -4. 05115400 | -1. 03899600 |
| H | -2. 09109000 | -3. 91710800 | -1. 74559800 |
| C | -4. 99849700 | -2. 06334100 | 0. 00974400  |
| H | -3. 67884900 | -0. 38368600 | 0. 12915900  |
| C | -5. 16487000 | -3. 38534200 | -0. 40630000 |
| H | -4. 23598100 | -5. 08472700 | -1. 34721800 |
| H | -5. 80728900 | -1. 54790600 | 0. 51775700  |
| H | -6. 10584700 | -3. 89584600 | -0. 22694900 |
| C | 0. 12215000  | 0. 40544400  | -1. 07929200 |
| O | 1. 10136600  | -0. 21697000 | -1. 49950800 |
| H | -1. 92551600 | 0. 56404500  | -0. 40472800 |
| C | -1. 20263400 | -0. 75494400 | 2. 56129900  |

|   |             |             |             |
|---|-------------|-------------|-------------|
| C | -2.34031400 | -0.69662100 | 3.40786100  |
| H | -2.59474100 | 0.12011500  | 4.06152200  |
| C | -3.04335000 | -1.87355100 | 3.24562300  |
| H | -3.96069200 | -2.15996900 | 3.73794700  |
| C | -2.35602000 | -2.65508600 | 2.30837400  |
| H | -2.56670100 | -3.62964100 | 1.89872900  |
| N | -1.24579100 | -1.99885500 | 1.89766700  |
| C | -0.14444300 | 0.17760600  | 2.41820100  |
| O | 0.85728300  | 0.10143800  | 1.70149500  |
| C | -0.12861000 | 1.45094400  | 3.30182300  |
| F | 0.34842800  | 2.47914900  | 2.56797900  |
| F | 0.71176000  | 1.27642300  | 4.32478600  |
| F | -1.29877300 | 1.86446500  | 3.80106400  |
| C | -0.31610800 | -2.46423400 | 0.95306800  |
| H | 0.46238500  | -1.76649200 | 0.70411700  |
| C | -0.37165500 | -3.76829400 | 0.43336600  |
| O | -1.24392200 | -4.62620400 | 0.70735600  |
| C | 0.64708400  | -4.12832900 | -0.62619900 |
| C | 1.83595500  | -3.42837300 | -0.86546100 |
| C | 0.35154600  | -5.23773300 | -1.42538000 |
| C | 2.69221900  | -3.82651500 | -1.88822100 |
| H | 2.10620800  | -2.57644600 | -0.24796700 |
| C | 1.20468900  | -5.63132600 | -2.45116000 |
| H | -0.56417700 | -5.78460100 | -1.22598000 |
| C | 2.37914000  | -4.92391200 | -2.68851400 |
| H | 3.61721000  | -3.28663700 | -2.06558800 |
| H | 0.95250000  | -6.49175200 | -3.06353300 |
| H | 3.05079800  | -5.22582100 | -3.48606200 |

#### TS4RR'''

|   |             |             |             |
|---|-------------|-------------|-------------|
| C | 4.08064700  | 0.67023500  | 0.25529300  |
| C | 5.08142100  | 1.09686800  | 1.32206800  |
| H | 3.67230400  | -0.31537900 | 0.47200000  |
| H | 4.66500400  | 0.93831900  | 2.32884800  |
| N | 2.95638100  | 1.63010600  | 0.35032600  |
| O | 5.44092000  | 2.45974800  | 1.14557500  |
| C | 3.10029400  | 2.88447200  | 0.87103800  |
| C | 4.39219900  | 3.32347800  | 1.50230400  |
| H | 4.65149100  | 4.32866100  | 1.16438700  |
| H | 4.25552900  | 3.34668500  | 2.59431200  |
| N | 1.98580400  | 3.55578900  | 0.80772200  |
| C | 1.67161800  | 1.50871400  | -0.05178200 |
| N | 1.10822300  | 2.69014400  | 0.22969200  |
| C | -0.23640700 | 3.13305700  | -0.03734900 |

|   |             |             |             |
|---|-------------|-------------|-------------|
| C | -0.51075800 | 3.67485100  | -1.29396700 |
| C | -1.19596900 | 2.95485300  | 0.95730000  |
| C | -1.82422800 | 4.06249900  | -1.53811100 |
| C | -2.49932600 | 3.34764900  | 0.65861900  |
| C | -2.82839400 | 3.90301200  | -0.57732500 |
| H | -2.07452800 | 4.49049000  | -2.50647400 |
| H | -3.27673900 | 3.17960400  | 1.39777800  |
| H | 5.99521400  | 0.50831100  | 1.21616400  |
| C | 4.68530100  | 0.68884700  | -1.15410100 |
| H | 3.86367100  | 0.63329100  | -1.87263500 |
| H | 5.22755000  | 1.62966900  | -1.30122800 |
| C | 5.59855400  | -0.50086200 | -1.32594200 |
| C | 5.03783900  | -1.77727400 | -1.44736600 |
| C | 6.98675100  | -0.36337000 | -1.31622800 |
| C | 5.85955000  | -2.89360600 | -1.56383400 |
| H | 3.95402000  | -1.87970700 | -1.44713800 |
| C | 7.80933800  | -1.48258400 | -1.43294100 |
| H | 7.42535500  | 0.62777100  | -1.21985300 |
| C | 7.24644300  | -2.74927800 | -1.55654800 |
| H | 5.41549800  | -3.87976100 | -1.66496600 |
| H | 8.88852900  | -1.36281100 | -1.42829000 |
| H | 7.88575000  | -3.62214400 | -1.64785500 |
| C | -4.24531700 | 4.30294300  | -0.89773700 |
| H | -4.68031000 | 3.61702400  | -1.63208400 |
| H | -4.87649100 | 4.27679200  | -0.00742000 |
| H | -4.28098600 | 5.31071600  | -1.32245500 |
| C | 0.56537300  | 3.78786900  | -2.34076000 |
| H | 1.45739700  | 4.28502700  | -1.94578000 |
| H | 0.86375800  | 2.79461900  | -2.69735400 |
| H | 0.20787200  | 4.35780700  | -3.20065000 |
| C | -0.83757500 | 2.28641400  | 2.25515800  |
| H | -0.49989500 | 1.26088400  | 2.06042600  |
| H | -0.03511800 | 2.82325700  | 2.77228300  |
| H | -1.70937800 | 2.22380500  | 2.90726800  |
| C | -0.84201800 | -1.08455400 | -1.18200700 |
| C | -0.28836400 | 0.12316300  | -0.76689800 |
| H | -0.14683000 | -1.89626500 | -1.38909300 |
| C | -2.18765800 | -1.24190200 | -1.71519000 |
| C | -2.63583500 | -2.53127100 | -2.04495200 |
| C | -3.05975300 | -0.15341500 | -1.89540500 |
| C | -3.92906000 | -2.73137300 | -2.50941900 |
| H | -1.96681700 | -3.37355000 | -1.87861900 |
| C | -4.34798900 | -0.35814400 | -2.36970300 |
| H | -2.72946400 | 0.85328800  | -1.65134100 |

|   |             |             |             |
|---|-------------|-------------|-------------|
| C | -4.79048000 | -1.64800100 | -2.66600700 |
| H | -4.27261800 | -3.73733600 | -2.72966800 |
| H | -5.01952500 | 0.48723500  | -2.48783200 |
| H | -5.80394800 | -1.80496800 | -3.02302200 |
| C | 1.11145800  | 0.23240100  | -0.65455000 |
| O | 1.97053500  | -0.60312600 | -0.98204200 |
| H | -0.93411900 | 0.94083200  | -0.48197400 |
| C | -3.98048100 | -1.78504700 | 0.85239700  |
| C | -5.10023600 | -2.61506100 | 0.69799200  |
| H | -6.12527700 | -2.28447700 | 0.65713700  |
| C | -4.64471300 | -3.93135700 | 0.63631100  |
| H | -5.24403400 | -4.82306300 | 0.52359100  |
| C | -3.25982100 | -3.90085100 | 0.72762600  |
| H | -2.52430400 | -4.68812200 | 0.68931200  |
| N | -2.84789700 | -2.61291300 | 0.88437900  |
| C | -3.90353300 | -0.36040000 | 0.97723100  |
| O | -2.92595600 | 0.31784700  | 1.27271300  |
| C | -5.18997000 | 0.47442000  | 0.76040000  |
| F | -5.68211000 | 0.85501900  | 1.94672500  |
| F | -6.17439500 | -0.13078700 | 0.08787900  |
| F | -4.88260900 | 1.58828600  | 0.07810200  |
| C | -1.52768400 | -2.16966700 | 1.00875200  |
| H | -1.43026200 | -1.20556400 | 1.47235500  |
| C | -0.42548700 | -3.04877500 | 0.84491400  |
| O | -0.47595100 | -4.16333300 | 0.29026100  |
| C | 0.91056600  | -2.55746200 | 1.35181000  |
| C | 1.06682500  | -1.50000500 | 2.25397900  |
| C | 2.04330100  | -3.26902100 | 0.94516900  |
| C | 2.32981400  | -1.16744800 | 2.74345300  |
| H | 0.19956800  | -0.96656000 | 2.62913100  |
| C | 3.30261300  | -2.94056900 | 1.43024300  |
| H | 1.89806100  | -4.09332700 | 0.25462500  |
| C | 3.44879300  | -1.89449000 | 2.34278700  |
| H | 2.43027300  | -0.36467900 | 3.47045000  |
| H | 4.17458500  | -3.50367100 | 1.11005100  |
| H | 4.43141700  | -1.65606300 | 2.74402600  |

#### TS4RS

|   |            |             |            |
|---|------------|-------------|------------|
| C | 3.87726900 | 0.40111200  | 0.34635900 |
| C | 4.79093000 | 0.55903200  | 1.55697500 |
| H | 3.23209700 | -0.47155300 | 0.45816100 |
| H | 4.22152800 | 0.45797400  | 2.49208400 |
| N | 2.99256800 | 1.58784300  | 0.34499600 |
| O | 5.44906500 | 1.81750600  | 1.51109900 |

|   |              |              |              |
|---|--------------|--------------|--------------|
| C | 3. 30415700  | 2. 74663600  | 0. 99855900  |
| C | 4. 56759200  | 2. 87366600  | 1. 80252700  |
| H | 5. 07015200  | 3. 81211000  | 1. 56270100  |
| H | 4. 29801200  | 2. 88214400  | 2. 86852900  |
| N | 2. 35172400  | 3. 62677500  | 0. 88322300  |
| C | 1. 76776500  | 1. 75205000  | -0. 19688500 |
| N | 1. 40485900  | 2. 99601100  | 0. 13389000  |
| C | 0. 13756300  | 3. 63444200  | -0. 08599900 |
| C | -0. 20032600 | 4. 05376700  | -1. 37173000 |
| C | -0. 72080300 | 3. 73922600  | 1. 01507400  |
| C | -1. 48466500 | 4. 56897200  | -1. 55326000 |
| C | -1. 98856400 | 4. 26199300  | 0. 77820500  |
| C | -2. 39196800 | 4. 66563600  | -0. 49838500 |
| H | -1. 78335700 | 4. 89040800  | -2. 54738200 |
| H | -2. 68404300 | 4. 34834100  | 1. 60951400  |
| H | 5. 56334300  | -0. 21163300 | 1. 52281400  |
| C | 4. 66472800  | 0. 33072700  | -0. 96637900 |
| H | 3. 95764700  | 0. 46732900  | -1. 78743700 |
| H | 5. 39197000  | 1. 14926700  | -0. 98291600 |
| C | 5. 35786500  | -1. 00291500 | -1. 10455200 |
| C | 4. 59630200  | -2. 16746000 | -1. 25089200 |
| C | 6. 75042000  | -1. 09903600 | -1. 07593100 |
| C | 5. 22538400  | -3. 40087600 | -1. 38924800 |
| H | 3. 50897100  | -2. 09858900 | -1. 25833900 |
| C | 7. 37924000  | -2. 33519500 | -1. 21025500 |
| H | 7. 34454800  | -0. 19676100 | -0. 95316400 |
| C | 6. 61656500  | -3. 48848500 | -1. 37221600 |
| H | 4. 62346600  | -4. 29637400 | -1. 50841000 |
| H | 8. 46281100  | -2. 39546000 | -1. 19073200 |
| H | 7. 10350200  | -4. 45218500 | -1. 48261200 |
| C | -3. 79103600 | 5. 17785500  | -0. 71889100 |
| H | -4. 52113500 | 4. 38727100  | -0. 51872300 |
| H | -4. 01518400 | 6. 00848200  | -0. 04410100 |
| H | -3. 93273400 | 5. 52056200  | -1. 74528300 |
| C | 0. 74993900  | 3. 89538700  | -2. 52755400 |
| H | 1. 77243600  | 4. 16068500  | -2. 24636300 |
| H | 0. 75296900  | 2. 85727300  | -2. 87845100 |
| H | 0. 44477600  | 4. 52997600  | -3. 36075500 |
| C | -0. 29451200 | 3. 28754100  | 2. 38792200  |
| H | 0. 17852500  | 2. 29927200  | 2. 35505500  |
| H | 0. 42674900  | 3. 98869700  | 2. 81728800  |
| H | -1. 15947600 | 3. 22986600  | 3. 05162900  |
| C | -1. 01092300 | -0. 43555600 | -1. 45580700 |
| C | -0. 35131600 | 0. 74246600  | -1. 12952700 |

|   |             |             |             |
|---|-------------|-------------|-------------|
| H | -0.39132400 | -1.25259500 | -1.81625000 |
| C | -2.43698000 | -0.48903700 | -1.81928600 |
| C | -2.99208200 | -1.70752900 | -2.22968600 |
| C | -3.27130300 | 0.63334600  | -1.73337800 |
| C | -4.34503700 | -1.81179700 | -2.52864200 |
| H | -2.35667800 | -2.58844000 | -2.27748800 |
| C | -4.62572300 | 0.52939000  | -2.02889900 |
| H | -2.86660800 | 1.59319900  | -1.42543200 |
| C | -5.16770400 | -0.69173400 | -2.42294300 |
| H | -4.76045500 | -2.76930500 | -2.82630500 |
| H | -5.26251400 | 1.40454300  | -1.94532100 |
| H | -6.22790900 | -0.77356800 | -2.63916700 |
| C | 1.04956100  | 0.65752200  | -0.95211300 |
| O | 1.76169800  | -0.30029200 | -1.29330600 |
| H | -0.89843100 | 1.62006800  | -0.82045600 |
| C | -3.68212000 | -1.10182500 | 1.07976400  |
| C | -4.47064700 | -0.03432000 | 1.52382500  |
| H | -5.54155800 | -0.06623700 | 1.65574800  |
| C | -3.62260600 | 1.04785100  | 1.75903300  |
| H | -3.89830900 | 2.03056300  | 2.11229300  |
| C | -2.32937800 | 0.63128900  | 1.45781600  |
| H | -1.38433800 | 1.14079000  | 1.50787100  |
| N | -2.35602300 | -0.66680100 | 1.06170600  |
| C | -4.11841400 | -2.43002200 | 0.73904100  |
| C | -1.25493300 | -1.43016200 | 0.60953300  |
| H | -1.53899100 | -2.44154400 | 0.36561300  |
| C | 0.06271300  | -1.17468200 | 1.07403200  |
| O | 0.44577900  | -0.06926200 | 1.52390500  |
| C | 1.05982200  | -2.29423600 | 0.95958500  |
| C | 0.94261100  | -3.35205000 | 0.05166400  |
| C | 2.14291800  | -2.28273000 | 1.84499900  |
| C | 1.88537100  | -4.37526900 | 0.03701600  |
| H | 0.12059600  | -3.37391000 | -0.65766200 |
| C | 3.08492800  | -3.30654200 | 1.83257200  |
| H | 2.21796900  | -1.45929800 | 2.54932500  |
| C | 2.95524100  | -4.36011500 | 0.93097600  |
| H | 1.78465900  | -5.18766100 | -0.67616100 |
| H | 3.91642200  | -3.28738400 | 2.53058300  |
| H | 3.68811000  | -5.16061200 | 0.91890300  |
| C | -5.64559200 | -2.66448200 | 0.87123500  |
| F | -6.04369900 | -2.51753300 | 2.14490400  |
| F | -5.96374900 | -3.89346600 | 0.47982500  |
| F | -6.35860400 | -1.80120600 | 0.13182200  |
| O | -3.44675300 | -3.38556300 | 0.38793000  |

**TS4RS'**

|   |             |             |             |
|---|-------------|-------------|-------------|
| C | -3.71327300 | 0.05316300  | -0.19051800 |
| C | -4.85798900 | -0.22468800 | 0.77928200  |
| H | -3.09330600 | 0.88488000  | 0.14732600  |
| H | -4.48463500 | -0.29283400 | 1.81114500  |
| N | -2.86483400 | -1.15869300 | -0.16441700 |
| O | -5.52020200 | -1.42734600 | 0.41188900  |
| C | -3.34236400 | -2.39172600 | 0.17646500  |
| C | -4.74135500 | -2.56420700 | 0.69513700  |
| H | -5.21392500 | -3.42726200 | 0.22363100  |
| H | -4.68200800 | -2.74296300 | 1.77882100  |
| N | -2.41429000 | -3.30159700 | 0.07783500  |
| C | -1.55960100 | -1.30375400 | -0.45750600 |
| N | -1.31122900 | -2.61013900 | -0.31991500 |
| C | -0.10134200 | -3.31921600 | -0.65206300 |
| C | 0.22890800  | -3.44351800 | -2.00441800 |
| C | 0.70201700  | -3.79286700 | 0.38570000  |
| C | 1.44221100  | -4.05473500 | -2.30680700 |
| C | 1.90363600  | -4.40279000 | 0.02538000  |
| C | 2.29676100  | -4.52437800 | -1.30714100 |
| H | 1.73193600  | -4.15725000 | -3.34933400 |
| H | 2.55661500  | -4.77369900 | 0.81163400  |
| H | -5.59253600 | 0.57968400  | 0.71162500  |
| C | -4.20877600 | 0.31324800  | -1.61955500 |
| H | -3.34893900 | 0.23495100  | -2.28874800 |
| H | -4.94372200 | -0.45373000 | -1.88524800 |
| C | -4.80733200 | 1.69506700  | -1.71213700 |
| C | -3.96132100 | 2.80973500  | -1.68964000 |
| C | -6.18745400 | 1.88754000  | -1.77843100 |
| C | -4.49399600 | 4.09422000  | -1.73707600 |
| H | -2.88556900 | 2.65239000  | -1.63244300 |
| C | -6.72089200 | 3.17455500  | -1.82837400 |
| H | -6.84699500 | 1.02295500  | -1.79436400 |
| C | -5.87474700 | 4.27931100  | -1.80734900 |
| H | -3.83075500 | 4.95378100  | -1.72491000 |
| H | -7.79607000 | 3.31233600  | -1.88476400 |
| H | -6.28793700 | 5.28208500  | -1.84799400 |
| C | 3.63647900  | -5.11156900 | -1.66263500 |
| H | 3.59606000  | -5.64665300 | -2.61404100 |
| H | 4.37819000  | -4.31203900 | -1.76297100 |
| H | 3.98726500  | -5.79962600 | -0.89057500 |
| C | -0.66562700 | -2.90080500 | -3.08732600 |
| H | -1.71591000 | -3.14700900 | -2.90430700 |



|   |             |             |             |
|---|-------------|-------------|-------------|
| H | -0.58033100 | -1.81000000 | -3.15200600 |
| H | -0.38142800 | -3.31394400 | -4.05614400 |
| C | 0.34947300  | -3.56440300 | 1.82966000  |
| H | 0.69489900  | -2.57423600 | 2.14913000  |
| H | -0.72624100 | -3.62092300 | 2.00691200  |
| H | 0.84264100  | -4.30428400 | 2.46289900  |
| C | 1.70563700  | 0.53652900  | -0.99927000 |
| C | 0.72803500  | -0.37888900 | -0.62791000 |
| H | 1.38900100  | 1.40207600  | -1.58110300 |
| C | 3.11980500  | 0.14952900  | -1.10553100 |
| C | 3.96756500  | 0.87645600  | -1.95092700 |
| C | 3.65313000  | -0.93258300 | -0.38882700 |
| C | 5.30595200  | 0.52690400  | -2.09121300 |
| H | 3.56743400  | 1.73414100  | -2.48623900 |
| C | 4.99047200  | -1.28171300 | -0.53034500 |
| H | 3.02566400  | -1.49010600 | 0.30164800  |
| C | 5.82140100  | -0.55655500 | -1.38493800 |
| H | 5.94887100  | 1.11059900  | -2.74226100 |
| H | 5.39003900  | -2.11680800 | 0.03778700  |
| H | 6.86742900  | -0.82736100 | -1.48814100 |
| C | -0.64383200 | -0.15624200 | -0.85821400 |
| O | -1.21693800 | 0.82524100  | -1.35483100 |
| H | 1.02267000  | -1.29917700 | -0.14575000 |
| C | -0.37371400 | 1.39252400  | 1.86905000  |
| C | -1.66824800 | 1.93884700  | 1.86182100  |
| H | -2.51132400 | 1.55685900  | 2.41887500  |
| C | -1.64303500 | 3.06122500  | 1.03933300  |
| H | -2.47084600 | 3.71398800  | 0.80264500  |
| C | -0.34160100 | 3.20474800  | 0.56313900  |
| H | 0.09818300  | 3.93433300  | -0.09474500 |
| N | 0.43309900  | 2.21520500  | 1.07331800  |
| C | 0.07650500  | 0.21748000  | 2.55184600  |
| C | 1.80953600  | 2.01407400  | 0.86747900  |
| H | 2.23365900  | 1.29456800  | 1.54384600  |
| C | 2.61620400  | 3.00821600  | 0.23853400  |
| O | 2.16454900  | 3.92003200  | -0.47898600 |
| C | 4.11091400  | 2.88777400  | 0.39448000  |
| C | 4.74989900  | 1.93253600  | 1.19260400  |
| C | 4.89413000  | 3.78428000  | -0.34028000 |
| C | 6.13884200  | 1.86690800  | 1.23493800  |
| H | 4.17838000  | 1.21857100  | 1.77580100  |
| C | 6.28128900  | 3.72493900  | -0.29137100 |
| H | 4.38133900  | 4.51805800  | -0.95256800 |
| C | 6.90911100  | 2.75934700  | 0.49321600  |

|   |             |             |             |
|---|-------------|-------------|-------------|
| H | 6.62056300  | 1.11075600  | 1.84719600  |
| H | 6.87471000  | 4.42725300  | -0.86893500 |
| H | 7.99285700  | 2.70418300  | 0.52975100  |
| C | -1.03300700 | -0.53562100 | 3.33468600  |
| F | -1.66990300 | 0.24493200  | 4.21390600  |
| F | -0.52992500 | -1.56974800 | 3.99738800  |
| F | -1.97194000 | -1.01859100 | 2.48382800  |
| O | 1.19315000  | -0.28210700 | 2.57903700  |

**TS4RS''**

|   |             |             |             |
|---|-------------|-------------|-------------|
| C | 3.24890300  | 1.19219100  | -0.25053400 |
| C | 4.30277700  | 1.77984000  | 0.68219700  |
| H | 2.92883500  | 0.21291800  | 0.09262600  |
| H | 3.99779700  | 1.66956700  | 1.73137600  |
| N | 2.06722400  | 2.08202200  | -0.15514300 |
| O | 4.51833000  | 3.14860800  | 0.36688400  |
| C | 2.14106900  | 3.36151300  | 0.31874800  |
| C | 3.44162300  | 3.94372100  | 0.79585700  |
| H | 3.57119600  | 4.94611800  | 0.38459600  |
| H | 3.41090700  | 4.01380800  | 1.89274900  |
| N | 0.96735600  | 3.92755900  | 0.34132100  |
| C | 0.76983100  | 1.83910600  | -0.44471000 |
| N | 0.12745900  | 2.97037500  | -0.13513600 |
| C | -1.28534900 | 3.23362200  | -0.19385600 |
| C | -1.82838100 | 3.69274100  | -1.39407700 |
| C | -2.04154400 | 2.94532500  | 0.94264400  |
| C | -3.20972700 | 3.86241400  | -1.43811400 |
| C | -3.41931800 | 3.13329100  | 0.84670900  |
| C | -4.01781400 | 3.58034600  | -0.33310100 |
| H | -3.66730300 | 4.21158300  | -2.36030700 |
| H | -4.04032900 | 2.91618100  | 1.71124900  |
| H | 5.24737400  | 1.25491300  | 0.52788000  |
| C | 3.74285600  | 1.07731400  | -1.69698800 |
| H | 2.87434000  | 0.92203700  | -2.34174100 |
| H | 4.23826800  | 2.01154400  | -1.98169200 |
| C | 4.68355200  | -0.09957100 | -1.81437900 |
| C | 4.17887900  | -1.39709900 | -1.66457300 |
| C | 6.05057900  | 0.07699500  | -2.02925500 |
| C | 5.03127100  | -2.49334500 | -1.73461800 |
| H | 3.11329600  | -1.53953000 | -1.49475200 |
| C | 6.90419700  | -1.02318300 | -2.10299500 |
| H | 6.44953000  | 1.08233300  | -2.14212400 |
| C | 6.39609500  | -2.31035100 | -1.95564400 |
| H | 4.62369300  | -3.49340500 | -1.61801600 |

|   |             |             |             |
|---|-------------|-------------|-------------|
| H | 7.96535300  | -0.87177000 | -2.27415800 |
| H | 7.05970500  | -3.16741800 | -2.01117300 |
| C | -5.51378000 | 3.72395500  | -0.43071000 |
| H | -5.78862000 | 4.64803900  | -0.94516900 |
| H | -5.93961100 | 2.89155700  | -1.00046400 |
| H | -5.97780500 | 3.72571200  | 0.55738000  |
| C | -0.95455900 | 3.92600800  | -2.59609600 |
| H | -0.08605600 | 4.54079500  | -2.34370300 |
| H | -0.58769400 | 2.97089600  | -2.98872200 |
| H | -1.51394900 | 4.42390100  | -3.38894400 |
| C | -1.38547500 | 2.40704100  | 2.18427000  |
| H | -2.13120800 | 2.20139300  | 2.95455400  |
| H | -0.84057700 | 1.47941300  | 1.96941800  |
| H | -0.66177500 | 3.12237500  | 2.58721900  |
| C | -1.56365200 | -0.99605200 | -1.34109000 |
| C | -1.12523400 | 0.29959100  | -1.06289500 |
| H | -0.81774500 | -1.70407000 | -1.69644400 |
| C | -2.96056100 | -1.31972900 | -1.63649700 |
| C | -3.27062400 | -2.58500200 | -2.15464900 |
| C | -4.00802900 | -0.40822800 | -1.41468900 |
| C | -4.58378400 | -2.92609100 | -2.46250400 |
| H | -2.47083000 | -3.30333100 | -2.30561000 |
| C | -5.31627300 | -0.75144400 | -1.72068000 |
| H | -3.80419800 | 0.56689400  | -0.98093000 |
| C | -5.60883800 | -2.00913000 | -2.25032400 |
| H | -4.80438200 | -3.90977800 | -2.86430300 |
| H | -6.11616400 | -0.04132400 | -1.53531700 |
| H | -6.63463600 | -2.27395400 | -2.48742200 |
| C | 0.26107700  | 0.50776600  | -0.95160700 |
| O | 1.14986100  | -0.33091200 | -1.18221100 |
| H | -1.83049800 | 1.08320700  | -0.84225400 |
| C | 1.43767200  | -2.38114900 | 1.08193600  |
| C | 2.39149300  | -3.34301700 | 0.70754200  |
| H | 3.43992300  | -3.31471200 | 0.96693300  |
| C | 1.74561200  | -4.28675100 | -0.08462300 |
| H | 2.18013700  | -5.15953500 | -0.54824000 |
| C | 0.40395700  | -3.90964800 | -0.16680000 |
| H | -0.44052300 | -4.39462200 | -0.62783500 |
| N | 0.21478300  | -2.76403000 | 0.52836800  |
| C | 1.67871100  | -1.16638000 | 1.78961300  |
| C | -1.01738500 | -2.10496300 | 0.73914300  |
| H | -0.90048600 | -1.16149400 | 1.24009800  |
| C | -2.22910400 | -2.84324200 | 0.80577800  |
| O | -2.36431400 | -4.00971000 | 0.39171500  |

|   |             |             |            |
|---|-------------|-------------|------------|
| C | -3.44719000 | -2.09803600 | 1.28845000 |
| C | -3.41387200 | -0.83880400 | 1.89896600 |
| C | -4.68474100 | -2.70440000 | 1.06077700 |
| C | -4.59747400 | -0.20165800 | 2.26041700 |
| H | -2.46848000 | -0.34957700 | 2.11266800 |
| C | -5.86669300 | -2.06599500 | 1.41684600 |
| H | -4.68856400 | -3.67848700 | 0.58429600 |
| C | -5.82759200 | -0.80837800 | 2.01448900 |
| H | -4.55833400 | 0.76680000  | 2.75091900 |
| H | -6.82116400 | -2.54642400 | 1.22325200 |
| H | -6.74837600 | -0.30706200 | 2.29704000 |
| C | 3.04805400  | -1.10937700 | 2.52060300 |
| F | 3.23191000  | -2.15523100 | 3.32872900 |
| F | 3.14039500  | 0.00180500  | 3.25276100 |
| F | 4.07647100  | -1.09317000 | 1.64608000 |
| O | 0.97091100  | -0.16788000 | 1.88344400 |

**TS4RS'''**

|   |             |             |             |
|---|-------------|-------------|-------------|
| C | -1.52644300 | 3.14587400  | 0.11552400  |
| C | -2.24151800 | 4.23428000  | 0.91066000  |
| H | -0.66062800 | 2.76206100  | 0.65320200  |
| H | -2.38830500 | 3.92375800  | 1.95449000  |
| N | -2.49049500 | 2.02317700  | 0.00288500  |
| O | -3.49368300 | 4.53926300  | 0.31302100  |
| C | -3.84343400 | 2.18661900  | 0.11067000  |
| C | -4.42726700 | 3.50800700  | 0.52131700  |
| H | -5.31553300 | 3.72450300  | -0.07373700 |
| H | -4.71799100 | 3.44746900  | 1.58083400  |
| N | -4.47876000 | 1.07541100  | -0.13129700 |
| C | -2.27381000 | 0.72494700  | -0.29516000 |
| N | -3.48833300 | 0.17370100  | -0.38908200 |
| C | -3.83137600 | -1.13321800 | -0.88638900 |
| C | -3.58839300 | -1.41035500 | -2.23563800 |
| C | -4.41618600 | -2.04829300 | -0.00920200 |
| C | -3.93527500 | -2.67903300 | -2.69379000 |
| C | -4.74392500 | -3.30227300 | -0.52004900 |
| C | -4.50456900 | -3.63707500 | -1.85333000 |
| H | -3.75702200 | -2.92339200 | -3.73787400 |
| H | -5.19471100 | -4.03532300 | 0.14381000  |
| H | -1.64036700 | 5.14555900  | 0.88754100  |
| C | -1.09421100 | 3.64098400  | -1.27422500 |
| H | -0.94464400 | 2.76899800  | -1.91362400 |
| H | -1.89489800 | 4.26001900  | -1.69326700 |
| C | 0.19908700  | 4.41841100  | -1.16899900 |

|   |              |              |              |
|---|--------------|--------------|--------------|
| C | 1. 40217300  | 3. 73313000  | -0. 95437500 |
| C | 0. 21812800  | 5. 81133800  | -1. 25705300 |
| C | 2. 59957000  | 4. 43113400  | -0. 84007600 |
| H | 1. 39804400  | 2. 64945700  | -0. 88050200 |
| C | 1. 41820700  | 6. 51182600  | -1. 13882100 |
| H | -0. 71136200 | 6. 34978800  | -1. 42910800 |
| C | 2. 61017200  | 5. 82304200  | -0. 93204600 |
| H | 3. 51865500  | 3. 87277200  | -0. 68791400 |
| H | 1. 42014400  | 7. 59487400  | -1. 21381500 |
| H | 3. 54475600  | 6. 36863900  | -0. 84564000 |
| C | -4. 83257000 | -5. 01132000 | -2. 37440800 |
| H | -5. 18161600 | -4. 96727000 | -3. 40866700 |
| H | -3. 94355300 | -5. 64959800 | -2. 35325700 |
| H | -5. 60343400 | -5. 49201900 | -1. 76862700 |
| C | -2. 96647000 | -0. 39651000 | -3. 15886800 |
| H | -3. 38747200 | 0. 60196000  | -3. 00533200 |
| H | -1. 88447500 | -0. 33641800 | -2. 99747700 |
| H | -3. 13573600 | -0. 67931900 | -4. 19882900 |
| C | -4. 66481700 | -1. 69389300 | 1. 43057300  |
| H | -5. 00433700 | -2. 56829600 | 1. 98759200  |
| H | -3. 74817900 | -1. 31925700 | 1. 89467200  |
| H | -5. 42037200 | -0. 90770900 | 1. 51817200  |
| C | 0. 58295400  | -1. 70438000 | -0. 51402600 |
| C | -0. 73492400 | -1. 25069400 | -0. 33158000 |
| H | 1. 22591100  | -1. 04923100 | -1. 09790900 |
| C | 0. 97012100  | -3. 10929700 | -0. 45570200 |
| C | 2. 10683100  | -3. 53688100 | -1. 15665900 |
| C | 0. 26363000  | -4. 04293400 | 0. 31940100  |
| C | 2. 51076100  | -4. 86554800 | -1. 11463000 |
| H | 2. 68119800  | -2. 80953800 | -1. 72585700 |
| C | 0. 67457200  | -5. 36936500 | 0. 36802800  |
| H | -0. 59258200 | -3. 71960200 | 0. 90237200  |
| C | 1. 79356300  | -5. 78561500 | -0. 35328500 |
| H | 3. 39384900  | -5. 17813900 | -1. 66259700 |
| H | 0. 12502800  | -6. 08113700 | 0. 97570000  |
| H | 2. 11020300  | -6. 82319100 | -0. 31313600 |
| C | -0. 90938800 | 0. 12949200  | -0. 48105800 |
| O | -0. 00434800 | 0. 96231600  | -0. 71282300 |
| H | -1. 54018500 | -1. 90095800 | -0. 01441700 |
| C | 4. 20472200  | -1. 06705000 | 0. 35498400  |
| C | 5. 22146900  | -2. 03294700 | 0. 36613800  |
| H | 6. 19183200  | -1. 91761400 | -0. 09333100 |
| C | 4. 75162300  | -3. 13091200 | 1. 08308400  |
| H | 5. 27427500  | -4. 05439900 | 1. 28151300  |

|   |             |             |             |
|---|-------------|-------------|-------------|
| C | 3.45317500  | -2.83911200 | 1.49463900  |
| H | 2.72905100  | -3.41974800 | 2.04389800  |
| N | 3.12389000  | -1.59118100 | 1.07286500  |
| C | 4.25616800  | 0.26592500  | -0.17865800 |
| C | 1.90285900  | -0.91977500 | 1.25304800  |
| H | 1.90068600  | 0.09430400  | 0.89081500  |
| C | 0.97013800  | -1.32990300 | 2.25262200  |
| O | 0.91464400  | -2.45281400 | 2.77804700  |
| C | -0.06187000 | -0.30112400 | 2.63195900  |
| C | 0.21901000  | 1.06743500  | 2.64123900  |
| C | -1.31108500 | -0.74254900 | 3.07877300  |
| C | -0.72760800 | 1.97577400  | 3.11222700  |
| H | 1.19073400  | 1.42661800  | 2.31441800  |
| C | -2.26886000 | 0.16682500  | 3.51739600  |
| H | -1.49998100 | -1.81228000 | 3.09465700  |
| C | -1.97739300 | 1.53127700  | 3.53805000  |
| H | -0.47854500 | 3.03260100  | 3.15796000  |
| H | -3.23267000 | -0.18637300 | 3.87199900  |
| H | -2.71124400 | 2.23981800  | 3.91269500  |
| C | 5.56834100  | 0.61334600  | -0.92558500 |
| F | 6.63215000  | 0.53591300  | -0.11167200 |
| F | 5.51733200  | 1.84919400  | -1.41351500 |
| F | 5.78621000  | -0.22716400 | -1.94864200 |
| O | 3.41366400  | 1.14926700  | -0.11140000 |

**TS4SR**

|   |             |            |             |
|---|-------------|------------|-------------|
| C | 3.99196200  | 0.84648100 | 0.14912400  |
| C | 5.33414500  | 1.53648600 | 0.38689800  |
| H | 3.72946200  | 0.16659900 | 0.96179500  |
| H | 5.35675300  | 2.01837200 | 1.37403100  |
| N | 2.99754100  | 1.94371800 | 0.16918400  |
| O | 5.56149700  | 2.49015800 | -0.64255400 |
| C | 3.29821200  | 3.20928400 | -0.25214000 |
| C | 4.71835100  | 3.61252300 | -0.54413800 |
| H | 4.76971000  | 4.15709000 | -1.48829000 |
| H | 5.04644800  | 4.28222600 | 0.26400900  |
| N | 2.24482600  | 3.97805300 | -0.22692400 |
| C | 1.68913800  | 1.92649400 | 0.47604900  |
| N | 1.25321300  | 3.16407200 | 0.22815200  |
| C | -0.09063300 | 3.64882100 | 0.40204900  |
| C | -0.87924400 | 3.78740000 | -0.74092700 |
| C | -0.56229900 | 3.85235000 | 1.70030200  |
| C | -2.22086100 | 4.11382000 | -0.54900900 |
| C | -1.90942600 | 4.17827800 | 1.83605400  |

|   |             |             |             |
|---|-------------|-------------|-------------|
| C | -2.75404000 | 4.29178900  | 0.72932900  |
| H | -2.86605400 | 4.21272100  | -1.41775000 |
| H | -2.31336700 | 4.33107700  | 2.83343400  |
| H | 6.14043900  | 0.80559400  | 0.32550500  |
| C | 3.93543000  | 0.13855500  | -1.21543600 |
| H | 2.90802900  | -0.19121400 | -1.38197000 |
| H | 4.21858600  | 0.86282800  | -1.98624000 |
| C | 4.86110300  | -1.05318600 | -1.23921300 |
| C | 4.40703400  | -2.28610000 | -0.76234800 |
| C | 6.17671900  | -0.93982900 | -1.69620200 |
| C | 5.26129200  | -3.38482700 | -0.73308900 |
| H | 3.37387500  | -2.36813500 | -0.43372000 |
| C | 7.03007700  | -2.04069900 | -1.67110600 |
| H | 6.52932300  | 0.01735900  | -2.07535400 |
| C | 6.57406100  | -3.26441300 | -1.18571400 |
| H | 4.89667400  | -4.33682600 | -0.35956000 |
| H | 8.04885300  | -1.94352300 | -2.03292800 |
| H | 7.23844400  | -4.12250200 | -1.16621200 |
| C | -4.22243500 | 4.56326500  | 0.92229800  |
| H | -4.73167500 | 3.65013500  | 1.24816800  |
| H | -4.38663500 | 5.32272200  | 1.69046300  |
| H | -4.69113300 | 4.89886100  | -0.00459500 |
| C | -0.30179800 | 3.56145300  | -2.11177000 |
| H | 0.46863900  | 4.30360000  | -2.33904400 |
| H | 0.15917500  | 2.57021200  | -2.18281100 |
| H | -1.08344400 | 3.62505200  | -2.86966200 |
| C | 0.33408300  | 3.68833400  | 2.89906600  |
| H | 1.30326500  | 4.16943400  | 2.73946300  |
| H | -0.12879300 | 4.13442000  | 3.78034400  |
| H | 0.51579200  | 2.63018300  | 3.11608300  |
| C | -1.10286900 | -0.39530900 | 1.53603100  |
| C | -0.40907400 | 0.64439100  | 0.96676800  |
| H | -0.55463900 | -1.03306200 | 2.22762000  |
| C | -2.56613200 | -0.50173500 | 1.57843300  |
| C | -3.15247600 | -1.53432700 | 2.32489800  |
| C | -3.40301800 | 0.40405100  | 0.91200200  |
| C | -4.53193300 | -1.66840700 | 2.39703300  |
| H | -2.50663900 | -2.24628400 | 2.83287200  |
| C | -4.78639000 | 0.26552600  | 0.98026900  |
| H | -2.97632000 | 1.21729400  | 0.32975900  |
| C | -5.35504200 | -0.77181000 | 1.71676800  |
| H | -4.96694600 | -2.48082400 | 2.96952400  |
| H | -5.42214600 | 0.96168900  | 0.44316600  |
| H | -6.43386300 | -0.88165000 | 1.75855200  |

|   |             |             |             |
|---|-------------|-------------|-------------|
| C | 0.97823300  | 0.80784200  | 1.23025300  |
| O | 1.68054500  | 0.26442800  | 2.08713800  |
| H | -0.88067200 | 1.30178900  | 0.24739800  |
| C | -2.83596300 | -1.15568300 | -1.77236700 |
| C | -2.97004500 | -0.19095000 | -2.77471100 |
| H | -3.88482600 | 0.03785200  | -3.30001200 |
| C | -1.71768600 | 0.39626900  | -2.96308900 |
| H | -1.45854700 | 1.16377000  | -3.67716100 |
| C | -0.83489300 | -0.21050200 | -2.07495500 |
| H | 0.22073400  | -0.07868300 | -1.90635000 |
| N | -1.50159000 | -1.16133500 | -1.35961400 |
| C | -3.85968800 | -2.01327700 | -1.23269400 |
| C | -0.96303000 | -1.99496900 | -0.36388000 |
| H | -1.65349000 | -2.73132200 | 0.01005700  |
| C | 0.40954300  | -2.06450400 | -0.08603300 |
| O | 1.27134600  | -1.23603500 | -0.48824700 |
| C | 0.83194200  | -3.15612900 | 0.85931300  |
| C | 0.23323700  | -4.42050800 | 0.85213300  |
| C | 1.88636900  | -2.90885700 | 1.74499000  |
| C | 0.67677700  | -5.41578700 | 1.71909400  |
| H | -0.56498200 | -4.63560400 | 0.14816800  |
| C | 2.32839600  | -3.90384500 | 2.61073000  |
| H | 2.32729100  | -1.91667500 | 1.75330300  |
| C | 1.72507800  | -5.16076400 | 2.60006000  |
| H | 0.20935500  | -6.39527300 | 1.69825500  |
| H | 3.14140800  | -3.69764400 | 3.30013800  |
| H | 2.07113600  | -5.93803900 | 3.27416300  |
| O | -3.73936700 | -2.91667700 | -0.42455400 |
| C | -5.28085600 | -1.77812500 | -1.80506800 |
| F | -5.66091100 | -0.49097600 | -1.75422600 |
| F | -5.33039000 | -2.14935100 | -3.09487800 |
| F | -6.17785600 | -2.49197900 | -1.13457300 |

**TS4SR'**

|   |             |             |             |
|---|-------------|-------------|-------------|
| C | -3.86947500 | 0.35593400  | -1.21498200 |
| C | -5.18795300 | 0.99582700  | -1.64646400 |
| H | -3.42974400 | -0.21788100 | -2.03096400 |
| H | -5.10239400 | 1.43093200  | -2.65362700 |
| N | -2.93455600 | 1.46965000  | -0.93195800 |
| O | -5.58820500 | 1.99248500  | -0.72085300 |
| C | -3.33682500 | 2.76433600  | -0.75922500 |
| C | -4.78837000 | 3.14096600  | -0.84161000 |
| H | -5.04103400 | 3.81836300  | -0.02387000 |
| H | -4.97726800 | 3.65539500  | -1.79607200 |



|   |             |             |             |
|---|-------------|-------------|-------------|
| N | -2.32213500 | 3.55232500  | -0.55282000 |
| C | -1.59356100 | 1.44301200  | -0.77699000 |
| N | -1.24300400 | 2.72244400  | -0.58070300 |
| C | 0.07530500  | 3.29677600  | -0.47149100 |
| C | 0.46638000  | 3.80869700  | 0.76535400  |
| C | 0.90400000  | 3.28946800  | -1.59929100 |
| C | 1.77063100  | 4.29535300  | 0.86723700  |
| C | 2.19342300  | 3.78456600  | -1.43942500 |
| C | 2.64765500  | 4.28023500  | -0.21479200 |
| H | 2.10936600  | 4.68166900  | 1.82549700  |
| H | 2.87045400  | 3.76475100  | -2.29048900 |
| H | -5.96656200 | 0.23041000  | -1.65576400 |
| C | -4.00801600 | -0.53466400 | 0.02122200  |
| H | -3.00078400 | -0.80036700 | 0.35247500  |
| H | -4.50084300 | 0.03318600  | 0.81874300  |
| C | -4.77559500 | -1.78588800 | -0.32125100 |
| C | -4.18284300 | -2.74312500 | -1.15205300 |
| C | -6.07451800 | -1.99537800 | 0.14222700  |
| C | -4.88164200 | -3.89356100 | -1.50458500 |
| H | -3.16128600 | -2.58237300 | -1.49449800 |
| C | -6.77380800 | -3.14859100 | -0.20935200 |
| H | -6.53769500 | -1.25266800 | 0.78830100  |
| C | -6.17814300 | -4.09849100 | -1.03348800 |
| H | -4.41198200 | -4.63495100 | -2.14422400 |
| H | -7.78162300 | -3.30399900 | 0.16359700  |
| H | -6.72089700 | -4.99818300 | -1.30673700 |
| C | 4.05992800  | 4.78641200  | -0.08495000 |
| H | 4.76710900  | 4.04415200  | -0.46797200 |
| H | 4.19799100  | 5.70940200  | -0.65842200 |
| H | 4.31245200  | 4.99562500  | 0.95761100  |
| C | -0.47159100 | 3.83324900  | 1.94238200  |
| H | -1.14777000 | 4.69235100  | 1.87514400  |
| H | -1.08855000 | 2.93354200  | 1.98918200  |
| H | 0.08873600  | 3.90556400  | 2.87671500  |
| C | 0.45392200  | 2.72560400  | -2.92035700 |
| H | -0.59341600 | 2.96510900  | -3.13033900 |
| H | 1.06307400  | 3.13134600  | -3.73094700 |
| H | 0.56200500  | 1.63468100  | -2.92987400 |
| C | 1.63997800  | -0.46216100 | -0.85323900 |
| C | 0.56947600  | 0.32129100  | -0.41489700 |
| H | 1.44383900  | -1.16299800 | -1.66513900 |
| C | 3.01047000  | 0.06157200  | -0.72204000 |
| C | 3.95683600  | -0.19525900 | -1.72125100 |
| C | 3.39286400  | 0.83076200  | 0.38753100  |

|   |             |             |             |
|---|-------------|-------------|-------------|
| C | 5.24700900  | 0.31653000  | -1.62716800 |
| H | 3.67679500  | -0.81235000 | -2.57131800 |
| C | 4.68131400  | 1.34285800  | 0.47823700  |
| H | 2.68611500  | 0.99118700  | 1.19825800  |
| C | 5.61252100  | 1.09323200  | -0.53028400 |
| H | 5.97192800  | 0.09457200  | -2.40460700 |
| H | 4.96481800  | 1.92885800  | 1.34864800  |
| H | 6.62288700  | 1.48416600  | -0.45031700 |
| C | -0.73433200 | 0.19049100  | -0.92323800 |
| O | -1.26562700 | -0.74538300 | -1.54013300 |
| H | 0.78024200  | 1.15830500  | 0.23674300  |
| C | -0.37309900 | -1.85830800 | 1.69925000  |
| C | -1.64787500 | -2.44085300 | 1.65873100  |
| H | -2.50526300 | -2.12064200 | 2.23275300  |
| C | -1.58374000 | -3.52540900 | 0.78422400  |
| H | -2.38739200 | -4.20168500 | 0.53170700  |
| C | -0.28610000 | -3.59482600 | 0.29304100  |
| H | 0.17336900  | -4.26406400 | -0.41435600 |
| N | 0.45836700  | -2.60907900 | 0.86036100  |
| C | 0.05962800  | -0.70567400 | 2.43263700  |
| C | 1.81044700  | -2.31765500 | 0.62484300  |
| H | 2.26517600  | -1.73653100 | 1.40801400  |
| C | 2.60517000  | -3.13213100 | -0.25138900 |
| O | 2.13529000  | -3.91222300 | -1.09152700 |
| C | 4.09848000  | -2.93582600 | -0.20134700 |
| C | 4.77289400  | -2.26542600 | 0.82434300  |
| C | 4.83620600  | -3.44500900 | -1.27499700 |
| C | 6.15067600  | -2.08533000 | 0.75922000  |
| H | 4.23428700  | -1.87415100 | 1.68115400  |
| C | 6.21299700  | -3.26985800 | -1.33771300 |
| H | 4.29613800  | -3.97275600 | -2.05438900 |
| C | 6.87434600  | -2.58163900 | -0.32192100 |
| H | 6.65939800  | -1.55206000 | 1.55689500  |
| H | 6.77223500  | -3.66726100 | -2.18004600 |
| H | 7.95000500  | -2.43761900 | -0.36966300 |
| O | 1.19255000  | -0.28187400 | 2.60476400  |
| C | -1.08517400 | 0.14344500  | 3.04198400  |
| F | -1.87529900 | 0.64971000  | 2.06045700  |
| F | -1.88153900 | -0.55103900 | 3.86270500  |
| F | -0.59869400 | 1.17422900  | 3.72339000  |

**TS4SR''**

|   |             |            |             |
|---|-------------|------------|-------------|
| C | -2.84756800 | 2.49457700 | -0.75234000 |
| C | -3.66879900 | 3.69097200 | -1.22528700 |

|   |             |             |             |
|---|-------------|-------------|-------------|
| H | -2.82958800 | 1.70854600  | -1.50623200 |
| H | -3.39508200 | 3.97201200  | -2.25365500 |
| N | -1.45213900 | 2.98442400  | -0.60929800 |
| O | -3.48621700 | 4.79632300  | -0.35479100 |
| C | -1.15039100 | 4.31188100  | -0.48152900 |
| C | -2.21700400 | 5.36969400  | -0.52792700 |
| H | -2.05745300 | 6.09299600  | 0.27404600  |
| H | -2.15056400 | 5.89686600  | -1.49205300 |
| N | 0.13259400  | 4.50089100  | -0.37729500 |
| C | -0.28390200 | 2.29955800  | -0.56028000 |
| N | 0.65991600  | 3.24729300  | -0.43661100 |
| C | 2.08675200  | 3.08721500  | -0.34570600 |
| C | 2.66127200  | 3.12564700  | 0.92582200  |
| C | 2.81092300  | 2.85361900  | -1.51442000 |
| C | 4.02473500  | 2.86256200  | 1.01350500  |
| C | 4.17198000  | 2.58825100  | -1.37130600 |
| C | 4.78638800  | 2.56483000  | -0.11890800 |
| H | 4.49901100  | 2.86523800  | 1.99094600  |
| H | 4.75833600  | 2.36726000  | -2.25998400 |
| H | -4.72794600 | 3.43033900  | -1.19895000 |
| C | -3.34924300 | 1.91530400  | 0.57726300  |
| H | -2.62568900 | 1.16783700  | 0.91641200  |
| H | -3.41345400 | 2.72304500  | 1.31518800  |
| C | -4.69296300 | 1.26301500  | 0.36549300  |
| C | -4.74984000 | 0.00897900  | -0.24619800 |
| C | -5.88101600 | 1.90993100  | 0.71205400  |
| C | -5.97898700 | -0.58962300 | -0.50521400 |
| H | -3.81911300 | -0.49522700 | -0.49991400 |
| C | -7.11171100 | 1.31247300  | 0.45072600  |
| H | -5.83733900 | 2.88603500  | 1.19191900  |
| C | -7.16087200 | 0.06236500  | -0.16075000 |
| H | -6.00871500 | -1.57437400 | -0.96033200 |
| H | -8.02982100 | 1.82131900  | 0.72884300  |
| H | -8.11944000 | -0.40738700 | -0.35947200 |
| C | 6.23430300  | 2.17773300  | 0.02598200  |
| H | 6.30883100  | 1.15073600  | 0.40284200  |
| H | 6.76034100  | 2.22609700  | -0.93056400 |
| H | 6.75118700  | 2.82689700  | 0.73861100  |
| C | 1.82195100  | 3.42711000  | 2.13723400  |
| H | 1.36013900  | 4.41619500  | 2.05474600  |
| H | 1.02126500  | 2.68714500  | 2.24796600  |
| H | 2.43156900  | 3.39748500  | 3.04220000  |
| C | 2.13449600  | 2.79996700  | -2.85662700 |
| H | 1.42960000  | 3.62743900  | -2.98496700 |

|   |             |             |             |
|---|-------------|-------------|-------------|
| H | 2.87212100  | 2.84880600  | -3.66012500 |
| H | 1.58079200  | 1.85853700  | -2.95941900 |
| C | 1.19365000  | -1.13446300 | -1.12095100 |
| C | 1.07323700  | 0.20640200  | -0.72367200 |
| H | 0.27832300  | -1.59676700 | -1.48913700 |
| C | 2.44469400  | -1.71873600 | -1.59910400 |
| C | 2.40219600  | -2.88776700 | -2.37217900 |
| C | 3.69814200  | -1.15740400 | -1.30227200 |
| C | 3.57284400  | -3.47959100 | -2.83478200 |
| H | 1.43700700  | -3.32523800 | -2.61424900 |
| C | 4.86410200  | -1.74852300 | -1.76787000 |
| H | 3.75958400  | -0.26009500 | -0.69146200 |
| C | 4.80731900  | -2.91167500 | -2.53556500 |
| H | 3.51996700  | -4.38387600 | -3.43357000 |
| H | 5.82573900  | -1.30269000 | -1.52827900 |
| H | 5.72213000  | -3.37133000 | -2.89709700 |
| C | -0.20082700 | 0.79019700  | -0.71360800 |
| O | -1.29724400 | 0.22439400  | -0.89690200 |
| H | 1.95000000  | 0.77514800  | -0.45724200 |
| C | -1.20996900 | -3.77227000 | 0.11192000  |
| C | -1.44316400 | -4.97640800 | -0.56139400 |
| H | -2.41632600 | -5.37620800 | -0.80399700 |
| C | -0.20339300 | -5.55699100 | -0.83426700 |
| H | -0.02098500 | -6.49750000 | -1.33314600 |
| C | 0.77673600  | -4.71316000 | -0.32500300 |
| H | 1.85180800  | -4.78873900 | -0.30539500 |
| N | 0.17578400  | -3.62887100 | 0.24039000  |
| C | -2.17465400 | -2.86560000 | 0.67852900  |
| C | 0.80627900  | -2.50157900 | 0.78629500  |
| H | 0.11106300  | -1.79031400 | 1.19617000  |
| C | 2.17794200  | -2.53236600 | 1.19233500  |
| O | 2.99145700  | -3.40287300 | 0.85988300  |
| C | 2.66487900  | -1.36006300 | 2.00463600  |
| C | 1.82584800  | -0.51622900 | 2.73924000  |
| C | 4.05017900  | -1.17217000 | 2.07661200  |
| C | 2.36788000  | 0.47754400  | 3.55131700  |
| H | 0.74956800  | -0.65934800 | 2.72520300  |
| C | 4.58870200  | -0.16481600 | 2.86835000  |
| H | 4.67927600  | -1.85340500 | 1.51145600  |
| C | 3.74671800  | 0.65732300  | 3.61760700  |
| H | 1.70966400  | 1.09904600  | 4.15192000  |
| H | 5.66637200  | -0.03517600 | 2.92506500  |
| H | 4.16561200  | 1.42358400  | 4.26549400  |
| O | -1.98129900 | -1.81174200 | 1.26162500  |

|   |             |             |             |
|---|-------------|-------------|-------------|
| C | -3.65217300 | -3.30605200 | 0.51684400  |
| F | -4.03241000 | -3.20339400 | -0.77170900 |
| F | -3.85583500 | -4.57648900 | 0.89281500  |
| F | -4.45439700 | -2.53936900 | 1.24392500  |

**TS4SR'''**

|   |             |             |             |
|---|-------------|-------------|-------------|
| C | -3.89788700 | -0.82311600 | -1.30825900 |
| C | -5.32897700 | -0.85908600 | -1.83794200 |
| H | -3.20523400 | -1.26744500 | -2.02067600 |
| H | -5.36120000 | -0.56630000 | -2.89689600 |
| N | -3.52363900 | 0.60539800  | -1.16949800 |
| O | -6.17600400 | -0.01436000 | -1.07403500 |
| C | -4.44276200 | 1.61410100  | -1.10696800 |
| C | -5.90125700 | 1.34159700  | -1.33209800 |
| H | -6.49792000 | 1.95007600  | -0.65134300 |
| H | -6.16386500 | 1.60703700  | -2.36650800 |
| N | -3.87452400 | 2.75695700  | -0.84926400 |
| C | -2.31293800 | 1.14684100  | -0.90530900 |
| N | -2.55190100 | 2.45436900  | -0.73643300 |
| C | -1.62722600 | 3.49861700  | -0.38466600 |
| C | -1.61666100 | 3.92151500  | 0.94657500  |
| C | -0.77624200 | 4.00974700  | -1.36572700 |
| C | -0.67714100 | 4.88842300  | 1.29736100  |
| C | 0.14416200  | 4.97445800  | -0.96190900 |
| C | 0.21453300  | 5.41600900  | 0.36075300  |
| H | -0.63656700 | 5.23161700  | 2.32790900  |
| H | 0.83175900  | 5.38249900  | -1.69799300 |
| H | -5.71297700 | -1.87668600 | -1.74092100 |
| C | -3.74292400 | -1.48740500 | 0.06314500  |
| H | -2.78681200 | -1.16721000 | 0.48684200  |
| H | -4.54276300 | -1.12671700 | 0.72059600  |
| C | -3.75407800 | -2.99056100 | -0.03654700 |
| C | -2.63634100 | -3.64525700 | -0.56728000 |
| C | -4.84332900 | -3.74403000 | 0.40043900  |
| C | -2.61394500 | -5.03282100 | -0.65361000 |
| H | -1.78409000 | -3.04888400 | -0.88884300 |
| C | -4.82007500 | -5.13584300 | 0.31491800  |
| H | -5.70985900 | -3.23830300 | 0.82057100  |
| C | -3.70546400 | -5.78134300 | -0.21131100 |
| H | -1.74045900 | -5.53321600 | -1.05971600 |
| H | -5.67114500 | -5.71328400 | 0.66224900  |
| H | -3.68390900 | -6.86462000 | -0.27519700 |
| C | 1.25556700  | 6.42051700  | 0.77872600  |
| H | 2.14502400  | 5.90899100  | 1.16071200  |

|   |              |              |              |
|---|--------------|--------------|--------------|
| H | 1. 56586400  | 7. 04255400  | -0. 06333800 |
| H | 0. 88266300  | 7. 07081000  | 1. 57321900  |
| C | -2. 58820100 | 3. 36081500  | 1. 95102800  |
| H | -3. 58028900 | 3. 80222200  | 1. 81514400  |
| H | -2. 69334700 | 2. 27648000  | 1. 84389000  |
| H | -2. 25216100 | 3. 57295500  | 2. 96759400  |
| C | -0. 81261600 | 3. 49832300  | -2. 77942600 |
| H | -1. 83848600 | 3. 40557700  | -3. 14703300 |
| H | -0. 26736800 | 4. 17115400  | -3. 44281700 |
| H | -0. 34085000 | 2. 51069600  | -2. 83360200 |
| C | 1. 37444100  | 0. 33370900  | -0. 67971400 |
| C | 0. 13903400  | 0. 97061000  | -0. 45639500 |
| H | 1. 35212100  | -0. 55527000 | -1. 30600800 |
| C | 2. 61987800  | 1. 10439900  | -0. 67625500 |
| C | 3. 71086300  | 0. 65119100  | -1. 43176000 |
| C | 2. 76723400  | 2. 28091200  | 0. 07829700  |
| C | 4. 91220500  | 1. 34880400  | -1. 44117300 |
| H | 3. 60596400  | -0. 25815700 | -2. 01866800 |
| C | 3. 96799900  | 2. 98114200  | 0. 06032800  |
| H | 1. 95067000  | 2. 63061900  | 0. 70225800  |
| C | 5. 04346800  | 2. 51890800  | -0. 69651000 |
| H | 5. 74741400  | 0. 97303600  | -2. 02424500 |
| H | 4. 07143200  | 3. 88561500  | 0. 65207200  |
| H | 5. 98079800  | 3. 06641500  | -0. 70208900 |
| C | -1. 02261800 | 0. 34612800  | -0. 92178200 |
| O | -1. 12977900 | -0. 79516000 | -1. 41824900 |
| H | 0. 09503600  | 1. 93487600  | 0. 02596000  |
| C | 4. 30682500  | -1. 73698900 | 0. 43872600  |
| C | 5. 60948400  | -1. 35541400 | 0. 78054300  |
| H | 6. 51209500  | -1. 78875900 | 0. 37696000  |
| C | 5. 51177600  | -0. 31118000 | 1. 69811900  |
| H | 6. 32301000  | 0. 22550800  | 2. 16657800  |
| C | 4. 15887500  | -0. 06530600 | 1. 90981500  |
| H | 3. 65711000  | 0. 65537600  | 2. 53307200  |
| N | 3. 42369500  | -0. 93571100 | 1. 17005800  |
| C | 3. 89531400  | -2. 64514100 | -0. 59102300 |
| C | 2. 02014700  | -1. 03694200 | 1. 10747200  |
| H | 1. 67036900  | -1. 96386100 | 0. 68541900  |
| C | 1. 19915600  | -0. 29065500 | 2. 01258800  |
| O | 1. 53790300  | 0. 77332800  | 2. 55410400  |
| C | -0. 19036700 | -0. 80727400 | 2. 27446800  |
| C | -0. 54276400 | -2. 15649800 | 2. 17854600  |
| C | -1. 12650000 | 0. 10547000  | 2. 77414800  |
| C | -1. 79555600 | -2. 58981400 | 2. 60952900  |

|   |             |             |             |
|---|-------------|-------------|-------------|
| H | 0.17125600  | -2.88470300 | 1.80774300  |
| C | -2.38056800 | -0.32367200 | 3.19502400  |
| H | -0.82083000 | 1.14367900  | 2.86150100  |
| C | -2.71233200 | -1.67750700 | 3.12596800  |
| H | -2.05553500 | -3.64149300 | 2.53828800  |
| H | -3.09324500 | 0.39194500  | 3.59595000  |
| H | -3.68584200 | -2.02043900 | 3.46394000  |
| O | 2.76068400  | -2.91372400 | -0.95644400 |
| C | 5.05681500  | -3.29093700 | -1.38497200 |
| F | 5.73995300  | -2.35144600 | -2.06194300 |
| F | 5.92914100  | -3.92148900 | -0.58434200 |
| F | 4.59694900  | -4.17404400 | -2.26391000 |

**TS4SS**

|   |             |             |             |
|---|-------------|-------------|-------------|
| C | 3.08678200  | 2.32241300  | 0.49516100  |
| C | 3.95280900  | 3.52644100  | 0.85798100  |
| H | 3.02191200  | 1.62659500  | 1.33078800  |
| H | 3.67603800  | 3.93145900  | 1.84198100  |
| N | 1.71575700  | 2.85186500  | 0.26936700  |
| O | 3.83729300  | 4.52951300  | -0.13834800 |
| C | 1.47850600  | 4.17208000  | 0.01333000  |
| C | 2.59219900  | 5.17740900  | -0.06818000 |
| H | 2.47346000  | 5.78676800  | -0.96584200 |
| H | 2.53501500  | 5.83405600  | 0.81199300  |
| N | 0.20194100  | 4.41336000  | -0.07903700 |
| C | 0.51263300  | 2.23187000  | 0.31557900  |
| N | -0.38652600 | 3.20381200  | 0.11589400  |
| C | -1.82747100 | 3.16256200  | 0.17629300  |
| C | -2.54581500 | 3.18467100  | -1.01776000 |
| C | -2.42321800 | 3.14615300  | 1.44186000  |
| C | -3.93775100 | 3.14108300  | -0.91174100 |
| C | -3.81239000 | 3.08440400  | 1.48767200  |
| C | -4.58285200 | 3.06171800  | 0.32079300  |
| H | -4.52889300 | 3.14513800  | -1.82474900 |
| H | -4.30483600 | 3.04771200  | 2.45623400  |
| H | 4.99766100  | 3.21184800  | 0.88342100  |
| C | 3.60181200  | 1.59607600  | -0.75078500 |
| H | 2.81689600  | 0.92610100  | -1.11203500 |
| H | 3.82119500  | 2.34027000  | -1.52390900 |
| C | 4.83186800  | 0.79177900  | -0.40480900 |
| C | 4.69851200  | -0.35748100 | 0.38307000  |
| C | 6.10287100  | 1.18074900  | -0.82983200 |
| C | 5.81865300  | -1.10771600 | 0.72692300  |
| H | 3.70575400  | -0.66799900 | 0.70136300  |

|   |             |             |             |
|---|-------------|-------------|-------------|
| C | 7.22655400  | 0.43206500  | -0.48101500 |
| H | 6.21165000  | 2.07374700  | -1.44134700 |
| C | 7.08539000  | -0.71360500 | 0.29621400  |
| H | 5.69755500  | -2.00758900 | 1.32196600  |
| H | 8.20927300  | 0.74360200  | -0.82064100 |
| H | 7.95840000  | -1.30037600 | 0.56383700  |
| C | -6.07919600 | 2.91610400  | 0.39971700  |
| H | -6.34452500 | 1.85967400  | 0.51927100  |
| H | -6.48875200 | 3.46027700  | 1.25403900  |
| H | -6.56230800 | 3.27998500  | -0.50979900 |
| C | -1.85684700 | 3.19244000  | -2.35341500 |
| H | -1.06282200 | 3.94308700  | -2.38850000 |
| H | -1.42445500 | 2.20191500  | -2.53581300 |
| H | -2.57436500 | 3.41046700  | -3.14650400 |
| C | -1.59326100 | 3.14037300  | 2.69730400  |
| H | -1.10686700 | 2.16716100  | 2.83028200  |
| H | -0.81463700 | 3.90872000  | 2.66511100  |
| H | -2.22087300 | 3.32540200  | 3.56998300  |
| C | -1.11344700 | -1.10760600 | 1.06744300  |
| C | -0.94936800 | 0.22962300  | 0.80418500  |
| H | -0.22302500 | -1.70887100 | 1.23330100  |
| C | -2.39862000 | -1.71677000 | 1.42711800  |
| C | -2.45389100 | -3.09071000 | 1.69982600  |
| C | -3.58140700 | -0.96487700 | 1.51865800  |
| C | -3.65725700 | -3.69807600 | 2.04294600  |
| H | -1.54339400 | -3.67667100 | 1.62332300  |
| C | -4.78144700 | -1.57502000 | 1.85573100  |
| H | -3.56928100 | 0.10308300  | 1.31906300  |
| C | -4.82529600 | -2.94394500 | 2.11937800  |
| H | -3.68207400 | -4.76350900 | 2.24929600  |
| H | -5.68935900 | -0.98146800 | 1.90572000  |
| H | -5.76611200 | -3.41855000 | 2.38085800  |
| C | 0.36035700  | 0.74441200  | 0.61237900  |
| O | 1.42528200  | 0.13039400  | 0.72959800  |
| H | -1.80233600 | 0.85729600  | 0.59475500  |
| C | 1.65953900  | -2.73185700 | -0.85594800 |
| C | 2.89804300  | -2.33497000 | -1.37306300 |
| H | 3.85799500  | -2.72988100 | -1.07617500 |
| C | 2.65486200  | -1.35073300 | -2.32994300 |
| H | 3.38865000  | -0.82935100 | -2.92741900 |
| C | 1.27935600  | -1.15357500 | -2.37812500 |
| H | 0.68172700  | -0.47868700 | -2.96662600 |
| N | 0.66893600  | -1.98888600 | -1.49840100 |
| C | 1.41574200  | -3.70412100 | 0.16297100  |



|   |             |             |             |
|---|-------------|-------------|-------------|
| O | 0.34032500  | -4.12515500 | 0.56296100  |
| C | 2.68941500  | -4.26848600 | 0.84314000  |
| F | 2.36794900  | -5.12919100 | 1.80191100  |
| F | 3.42382200  | -3.28830200 | 1.39972300  |
| F | 3.47803100  | -4.90466900 | -0.03614300 |
| C | -0.72816100 | -2.08968600 | -1.29702400 |
| H | -1.06953600 | -3.06328300 | -0.98538800 |
| C | -1.57215000 | -1.05476200 | -1.71832200 |
| O | -1.15917600 | 0.09835200  | -2.02426700 |
| C | -3.05660800 | -1.28896100 | -1.66262100 |
| C | -3.65931900 | -2.54107900 | -1.49454800 |
| C | -3.87608500 | -0.16244800 | -1.76533700 |
| C | -5.04200900 | -2.65011600 | -1.39792800 |
| H | -3.05463000 | -3.44025600 | -1.43653500 |
| C | -5.25988600 | -0.26842300 | -1.67350600 |
| H | -3.39322800 | 0.79545800  | -1.91633000 |
| C | -5.84917200 | -1.51589100 | -1.48298300 |
| H | -5.49287000 | -3.62711500 | -1.25243400 |
| H | -5.87660000 | 0.62365000  | -1.75382400 |
| H | -6.92853400 | -1.60857200 | -1.40793800 |

**TS4SS'**

|   |             |             |             |
|---|-------------|-------------|-------------|
| C | -2.71341500 | -2.61807700 | -0.80950500 |
| C | -3.84753500 | -3.42761000 | -1.43664800 |
| H | -1.83870400 | -2.56733400 | -1.46124400 |
| H | -4.07819300 | -3.06112500 | -2.44654000 |
| N | -3.25056700 | -1.24126500 | -0.70884900 |
| O | -4.99466600 | -3.35304400 | -0.60052400 |
| C | -4.58209000 | -0.98340200 | -0.53331500 |
| C | -5.60410700 | -2.08468900 | -0.61879700 |
| H | -6.29126100 | -2.02898500 | 0.22710700  |
| H | -6.17740600 | -1.93536600 | -1.54508400 |
| N | -4.80426600 | 0.29685900  | -0.42375000 |
| C | -2.61407500 | -0.05796500 | -0.70814000 |
| N | -3.56704500 | 0.85818000  | -0.53294000 |
| C | -3.41998600 | 2.29065200  | -0.56683400 |
| C | -3.47353800 | 2.98655400  | 0.64125700  |
| C | -3.21523700 | 2.90180300  | -1.80520600 |
| C | -3.30177400 | 4.36763600  | 0.58513700  |
| C | -3.04895400 | 4.28507000  | -1.80495000 |
| C | -3.08788900 | 5.03030800  | -0.62516500 |
| H | -3.32833900 | 4.93744800  | 1.51019100  |
| H | -2.88147100 | 4.79196100  | -2.75155300 |
| H | -3.56345300 | -4.47839600 | -1.49228600 |

|   |             |             |             |
|---|-------------|-------------|-------------|
| C | -2.34063900 | -3.12467900 | 0.59351500  |
| H | -1.63270500 | -2.41736200 | 1.03230700  |
| H | -3.25374800 | -3.15559800 | 1.19708800  |
| C | -1.70935500 | -4.49388800 | 0.52037100  |
| C | -0.33461000 | -4.61353400 | 0.29476100  |
| C | -2.48365400 | -5.65083100 | 0.64422500  |
| C | 0.25039600  | -5.87255600 | 0.18736300  |
| H | 0.26518500  | -3.70840100 | 0.22922100  |
| C | -1.89734700 | -6.90976800 | 0.53876500  |
| H | -3.55246400 | -5.55894200 | 0.82712200  |
| C | -0.52841700 | -7.02206800 | 0.30704500  |
| H | 1.31917600  | -5.95540600 | 0.01666600  |
| H | -2.50794000 | -7.80132900 | 0.64140400  |
| H | -0.06918500 | -8.00217700 | 0.22661400  |
| C | -2.92784700 | 6.52743500  | -0.66188500 |
| H | -2.25324400 | 6.83159000  | -1.46494700 |
| H | -3.89358700 | 7.01208800  | -0.83754700 |
| H | -2.53294600 | 6.90532000  | 0.28330600  |
| C | -3.67490200 | 2.25909900  | 1.94279700  |
| H | -4.62922300 | 1.72493100  | 1.95321800  |
| H | -2.87915800 | 1.52290200  | 2.10247700  |
| H | -3.65721200 | 2.95842700  | 2.77992600  |
| C | -3.16549600 | 2.09810700  | -3.07790100 |
| H | -2.25506600 | 1.49197200  | -3.13531000 |
| H | -4.02153700 | 1.41961100  | -3.14776900 |
| H | -3.18320800 | 2.75999400  | -3.94459200 |
| C | 0.85797900  | 1.43306900  | -0.65435900 |
| C | -0.47607900 | 1.18718000  | -0.40828900 |
| H | 1.28622300  | 0.95846500  | -1.53585500 |
| C | 1.61372000  | 2.55087800  | -0.07572100 |
| C | 2.85175500  | 2.89246600  | -0.63935400 |
| C | 1.16032100  | 3.26990000  | 1.03905500  |
| C | 3.61185800  | 3.92854100  | -0.11487300 |
| H | 3.21809500  | 2.32135600  | -1.48950900 |
| C | 1.92349300  | 4.30693700  | 1.56453200  |
| H | 0.22249900  | 3.00104100  | 1.51847100  |
| C | 3.14723000  | 4.64257000  | 0.98943900  |
| H | 4.57021400  | 4.17465900  | -0.56008600 |
| H | 1.56505600  | 4.84694700  | 2.43526100  |
| H | 3.74169400  | 5.44970700  | 1.40518000  |
| C | -1.16211400 | 0.16228000  | -1.10628400 |
| O | -0.79935200 | -0.53085600 | -2.06305100 |
| H | -1.00267200 | 1.69528100  | 0.39157800  |
| C | 4.02965100  | -0.91581900 | -1.19890600 |

|   |             |             |             |
|---|-------------|-------------|-------------|
| C | 4.09885300  | -1.72183100 | -2.34153000 |
| H | 4.98391400  | -1.88117200 | -2.93878500 |
| C | 2.82895400  | -2.26037400 | -2.55449200 |
| H | 2.52475900  | -2.91746800 | -3.35508100 |
| C | 1.99895800  | -1.77994300 | -1.54737000 |
| H | 0.94331800  | -1.90801100 | -1.37081200 |
| N | 2.71900500  | -0.97971200 | -0.71995000 |
| C | 5.09466200  | -0.16552900 | -0.58671000 |
| O | 5.06025500  | 0.53637300  | 0.41025500  |
| C | 6.45656900  | -0.26950500 | -1.31969400 |
| F | 7.38035300  | 0.45152400  | -0.69527600 |
| F | 6.36370100  | 0.18040700  | -2.58133300 |
| F | 6.89012800  | -1.53742300 | -1.37879300 |
| C | 2.24183000  | -0.28122900 | 0.40783900  |
| H | 2.97799400  | 0.37840300  | 0.82986400  |
| C | 1.09767900  | -0.64654900 | 1.12654100  |
| O | 0.19484200  | -1.42284700 | 0.71780700  |
| C | 0.85281500  | 0.13431800  | 2.38845900  |
| C | 1.85767000  | 0.79362300  | 3.10638500  |
| C | -0.46734200 | 0.22878000  | 2.84170100  |
| C | 1.54274800  | 1.54639200  | 4.23381000  |
| H | 2.89525600  | 0.71688400  | 2.79650500  |
| C | -0.78386400 | 0.98179100  | 3.96849200  |
| H | -1.23334300 | -0.30543900 | 2.28596900  |
| C | 0.22216100  | 1.64914600  | 4.66534100  |
| H | 2.33375800  | 2.05325200  | 4.77726900  |
| H | -1.81345800 | 1.04427800  | 4.30956800  |
| H | -0.02014300 | 2.23540500  | 5.54617000  |

**TS4SS''**

|   |             |             |             |
|---|-------------|-------------|-------------|
| C | 3.20634300  | -1.86845000 | -0.97473800 |
| C | 4.23127800  | -2.85062500 | -1.53506900 |
| H | 3.06088600  | -1.02283100 | -1.64551000 |
| H | 4.02944700  | -3.06839500 | -2.59457300 |
| N | 1.91582100  | -2.59926400 | -0.90351400 |
| O | 4.23568300  | -4.05433100 | -0.78359800 |
| C | 1.85077300  | -3.96441400 | -0.85728900 |
| C | 3.07951800  | -4.81146200 | -1.03062500 |
| H | 3.05769400  | -5.64221300 | -0.32281700 |
| H | 3.08876400  | -5.22183200 | -2.05222200 |
| N | 0.62769900  | -4.37785400 | -0.69532300 |
| C | 0.65449600  | -2.13032300 | -0.74532000 |
| N | -0.10557600 | -3.23272400 | -0.63596500 |
| C | -1.51630300 | -3.31469000 | -0.36734600 |
| C | -1.90460600 | -3.41248100 | 0.97010900  |

|   |             |             |             |
|---|-------------|-------------|-------------|
| C | -2.41275100 | -3.22119500 | -1.43006500 |
| C | -3.26873700 | -3.36325400 | 1.23792900  |
| C | -3.76873600 | -3.17138800 | -1.10826400 |
| C | -4.20915500 | -3.21694900 | 0.21489500  |
| H | -3.60435900 | -3.41214000 | 2.27053200  |
| H | -4.49476900 | -3.06366800 | -1.91031900 |
| H | 5.22633200  | -2.41127300 | -1.44359000 |
| C | 3.57839200  | -1.36746300 | 0.42601400  |
| H | 2.71947800  | -0.81750700 | 0.82243300  |
| H | 3.77597200  | -2.23393700 | 1.06779400  |
| C | 4.77664500  | -0.45455900 | 0.36152100  |
| C | 4.62773600  | 0.81692800  | -0.19668800 |
| C | 6.03090600  | -0.85594200 | 0.82366800  |
| C | 5.70972700  | 1.68663600  | -0.26921500 |
| H | 3.65460400  | 1.13166200  | -0.56440900 |
| C | 7.11942200  | 0.00992100  | 0.74173700  |
| H | 6.15205100  | -1.84680900 | 1.25681400  |
| C | 6.95893900  | 1.28285700  | 0.19920800  |
| H | 5.55741500  | 2.67970900  | -0.67992900 |
| H | 8.09061900  | -0.30843100 | 1.10879800  |
| H | 7.80603500  | 1.96025800  | 0.14698200  |
| C | -5.66936000 | -3.06631200 | 0.55203300  |
| H | -5.84483900 | -2.09305800 | 1.02508500  |
| H | -6.29557600 | -3.12583700 | -0.34127800 |
| H | -5.99739900 | -3.83695600 | 1.25590500  |
| C | -0.87466500 | -3.54678900 | 2.05855900  |
| H | -0.26870400 | -4.44708200 | 1.91249000  |
| H | -0.20232400 | -2.68133300 | 2.06637200  |
| H | -1.35562500 | -3.60248500 | 3.03687600  |
| C | -1.92431400 | -3.08151100 | -2.84553700 |
| H | -1.15417400 | -3.82399400 | -3.07726500 |
| H | -2.74740000 | -3.20461400 | -3.55198100 |
| H | -1.49324500 | -2.08388700 | -2.99510300 |
| C | -1.44007100 | 0.97054600  | -1.20741700 |
| C | -1.06356500 | -0.31594200 | -0.79137500 |
| H | -0.66568700 | 1.55168800  | -1.70828000 |
| C | -2.81849800 | 1.33989100  | -1.51348400 |
| C | -3.06045900 | 2.45031000  | -2.33488000 |
| C | -3.91856300 | 0.63239800  | -0.99988000 |
| C | -4.35996900 | 2.84145900  | -2.63864100 |
| H | -2.21521700 | 3.00195700  | -2.73856100 |
| C | -5.21403700 | 1.02469400  | -1.30603700 |
| H | -3.75727400 | -0.22048300 | -0.34495300 |
| C | -5.44048200 | 2.12952200  | -2.12663700 |

|   |             |             |             |
|---|-------------|-------------|-------------|
| H | -4.52827800 | 3.70249500  | -3.27853300 |
| H | -6.05476500 | 0.47032500  | -0.89773000 |
| H | -6.45576200 | 2.43376100  | -2.36235600 |
| C | 0.29546500  | -0.65793800 | -0.81940400 |
| O | 1.26141600  | 0.11543800  | -0.99530400 |
| H | -1.81339800 | -1.02228700 | -0.47253400 |
| C | 0.65372600  | 3.91340900  | -0.67279600 |
| C | 0.54184500  | 4.99797800  | -1.53757900 |
| H | 1.37813000  | 5.44192800  | -2.05869600 |
| C | -0.79299900 | 5.42587900  | -1.50998300 |
| H | -1.22144100 | 6.26581000  | -2.03733600 |
| C | -1.48282900 | 4.58020100  | -0.65476500 |
| H | -2.52370900 | 4.52415700  | -0.37891800 |
| N | -0.60922600 | 3.66207400  | -0.13880100 |
| C | 1.93021800  | 3.34218700  | -0.28138800 |
| C | -0.94577000 | 2.49174700  | 0.55555900  |
| H | -0.10360900 | 1.87495700  | 0.81567200  |
| C | -2.20475200 | 2.31919900  | 1.20686100  |
| O | -3.19800000 | 3.03262300  | 1.01670400  |
| C | -2.33502900 | 1.10803400  | 2.09200600  |
| C | -1.24900100 | 0.45565200  | 2.68452200  |
| C | -3.63209900 | 0.66378000  | 2.37102900  |
| C | -1.46313100 | -0.61435500 | 3.55046500  |
| H | -0.23550200 | 0.80757400  | 2.51566400  |
| C | -3.84309700 | -0.41824500 | 3.21742300  |
| H | -4.45696800 | 1.20499600  | 1.91720700  |
| C | -2.75647900 | -1.05692800 | 3.81517000  |
| H | -0.61603200 | -1.09247300 | 4.03462000  |
| H | -4.85512400 | -0.75098400 | 3.43324600  |
| H | -2.91921600 | -1.88362500 | 4.50258000  |
| C | 2.16582800  | 2.84225100  | 1.17404400  |
| O | 2.91262000  | 3.37854900  | -0.99726900 |
| F | 3.42385300  | 3.08429200  | 1.52517900  |
| F | 1.96068400  | 1.51640400  | 1.31087600  |
| F | 1.36405800  | 3.45901800  | 2.04936900  |

**TS4SS'''**

|   |             |             |             |
|---|-------------|-------------|-------------|
| C | -3.66904700 | -0.12794000 | -1.51261100 |
| C | -4.82223500 | 0.24383000  | -2.44852200 |
| H | -2.95138000 | -0.77696700 | -2.01084700 |
| H | -4.44453300 | 0.59057200  | -3.42311400 |
| N | -2.95960600 | 1.14999700  | -1.21062800 |
| O | -5.65280900 | 1.24238200  | -1.85407000 |
| C | -3.59596400 | 2.36278900  | -1.26478100 |

|   |             |             |             |
|---|-------------|-------------|-------------|
| C | -5.00615900 | 2.49506000  | -1.77659400 |
| H | -5.59300400 | 3.12954500  | -1.10732500 |
| H | -4.97231800 | 2.98380200  | -2.76454500 |
| N | -2.80320300 | 3.34157000  | -0.92154100 |
| C | -1.66974600 | 1.38476600  | -0.82069100 |
| N | -1.60409600 | 2.72409700  | -0.64410200 |
| C | -0.52021700 | 3.53683200  | -0.14740800 |
| C | -0.39523500 | 3.69294400  | 1.24189600  |
| C | 0.31167900  | 4.18596400  | -1.06974000 |
| C | 0.64887100  | 4.49778300  | 1.70048300  |
| C | 1.33926000  | 4.98131700  | -0.55295100 |
| C | 1.53137700  | 5.13958200  | 0.82297400  |
| H | 0.77151200  | 4.63028700  | 2.77253200  |
| H | 2.00413700  | 5.49008400  | -1.24643700 |
| H | -5.45333800 | -0.63148600 | -2.60817300 |
| C | -4.14716200 | -0.79416000 | -0.20126200 |
| H | -3.32127400 | -0.76544200 | 0.50987100  |
| H | -4.96930200 | -0.19701500 | 0.20918000  |
| C | -4.58598000 | -2.22730400 | -0.41928300 |
| C | -3.63751100 | -3.26151600 | -0.40337000 |
| C | -5.93183800 | -2.54521700 | -0.64770800 |
| C | -4.03307800 | -4.58133000 | -0.62170900 |
| H | -2.59502500 | -3.03083600 | -0.20135700 |
| C | -6.32625300 | -3.86664400 | -0.86737600 |
| H | -6.67929900 | -1.75406000 | -0.63680600 |
| C | -5.37537300 | -4.88775900 | -0.85801700 |
| H | -3.28975400 | -5.37364200 | -0.59759800 |
| H | -7.37489500 | -4.09692200 | -1.03704500 |
| H | -5.67947700 | -5.91792000 | -1.02389400 |
| C | 2.66736300  | 5.97762400  | 1.35947900  |
| H | 3.44061800  | 5.34396500  | 1.81185000  |
| H | 3.14129000  | 6.56547400  | 0.56801100  |
| H | 2.32155500  | 6.66875500  | 2.13654000  |
| C | -1.36934200 | 3.04956600  | 2.19790500  |
| H | -2.39632600 | 3.36902600  | 1.98357800  |
| H | -1.34169300 | 1.95628100  | 2.14507700  |
| H | -1.13650300 | 3.33127200  | 3.22763600  |
| C | 0.11740600  | 4.03004600  | -2.55864800 |
| H | 0.28009600  | 2.99310900  | -2.87778000 |
| H | -0.89723000 | 4.31348400  | -2.86061900 |
| H | 0.82287200  | 4.66000100  | -3.10667100 |
| C | 1.65757200  | -0.30429600 | -1.31070000 |
| C | 0.74324900  | 0.66057300  | -0.91664600 |
| H | 1.26255000  | -1.29404500 | -1.51668000 |

|   |             |             |             |
|---|-------------|-------------|-------------|
| C | 2.97132600  | 0.01620000  | -1.85772600 |
| C | 3.54596600  | -0.84779200 | -2.81190900 |
| C | 3.67143000  | 1.19312000  | -1.52079900 |
| C | 4.74896400  | -0.53004500 | -3.43468200 |
| H | 3.03268500  | -1.77070000 | -3.06697000 |
| C | 4.87716000  | 1.50501800  | -2.14032000 |
| H | 3.27634100  | 1.85200000  | -0.75408800 |
| C | 5.41727200  | 0.65174900  | -3.10605500 |
| H | 5.16873300  | -1.20810500 | -4.17268200 |
| H | 5.40597400  | 2.41219700  | -1.86000100 |
| H | 6.35944100  | 0.89913300  | -3.58790300 |
| C | -0.62915500 | 0.29553100  | -0.78501500 |
| O | -1.08181500 | -0.86987400 | -0.80779200 |
| H | 1.03776100  | 1.69705900  | -0.83024400 |
| C | 0.58189600  | -0.70526100 | 2.65576500  |
| C | 0.44444100  | 0.30939200  | 3.62123800  |
| H | -0.40709400 | 0.43439600  | 4.27240800  |
| C | 1.59829500  | 1.09589100  | 3.58406900  |
| H | 1.82268300  | 1.95389400  | 4.20337200  |
| C | 2.43896800  | 0.56792900  | 2.60806800  |
| H | 3.42817600  | 0.84116800  | 2.27975900  |
| N | 1.84775000  | -0.53566900 | 2.05127100  |
| C | -0.34189300 | -1.75161200 | 2.32467900  |
| O | -0.18804200 | -2.68039600 | 1.53611600  |
| C | -1.72306100 | -1.66358900 | 3.03817400  |
| F | -2.52655300 | -2.65670100 | 2.65254100  |
| F | -2.35538100 | -0.49033000 | 2.73633900  |
| F | -1.61694400 | -1.71255700 | 4.38432300  |
| C | 2.42042900  | -1.39008900 | 1.10615100  |
| H | 1.81898100  | -2.26551800 | 0.93752700  |
| C | 3.80341800  | -1.35345300 | 0.77022200  |
| O | 4.57546600  | -0.41269900 | 1.06791200  |
| C | 4.36007000  | -2.53383300 | 0.00864900  |
| C | 3.59397200  | -3.59357400 | -0.50648800 |
| C | 5.74995600  | -2.56209200 | -0.18405000 |
| C | 4.20336800  | -4.64421300 | -1.19275800 |
| H | 2.51553500  | -3.61217600 | -0.38598500 |
| C | 6.35960700  | -3.61475600 | -0.86168600 |
| H | 6.32838000  | -1.73396500 | 0.21079000  |
| C | 5.58820800  | -4.66198200 | -1.37106900 |
| H | 3.59293600  | -5.45408100 | -1.58465500 |
| H | 7.43884600  | -3.61902100 | -0.99462500 |
| H | 6.06090500  | -5.48531000 | -1.90083700 |

**M4RR**

|   |             |             |             |
|---|-------------|-------------|-------------|
| C | 3.30761000  | 0.53774500  | -0.38318100 |
| C | 4.56984900  | 0.95165200  | 0.37086300  |
| H | 2.84519100  | -0.33761900 | 0.07678500  |
| H | 4.39932100  | 0.95290400  | 1.45418500  |
| N | 2.34820200  | 1.65778900  | -0.22835000 |
| O | 5.00055700  | 2.23718900  | -0.05781600 |
| C | 2.72412000  | 2.92522200  | 0.12327000  |
| C | 4.15639100  | 3.24494000  | 0.44097100  |
| H | 4.43958300  | 4.19106700  | -0.02262600 |
| H | 4.25790300  | 3.34146900  | 1.53215600  |
| N | 1.70025900  | 3.72486100  | 0.19146300  |
| C | 1.00531200  | 1.66526500  | -0.37294200 |
| N | 0.63651400  | 2.92798100  | -0.12304000 |
| C | -0.67295700 | 3.50957500  | -0.25040900 |
| C | -1.15497000 | 3.76532900  | -1.53489800 |
| C | -1.40981200 | 3.75624400  | 0.90968200  |
| C | -2.44333900 | 4.28578300  | -1.64030500 |
| C | -2.69173000 | 4.27881300  | 0.75012200  |
| C | -3.22670700 | 4.53815300  | -0.51356400 |
| H | -2.84697400 | 4.48996400  | -2.62860900 |
| H | -3.29103800 | 4.47592600  | 1.63554900  |
| H | 5.36891300  | 0.24653200  | 0.13330800  |
| C | 3.59617500  | 0.28059300  | -1.86856200 |
| H | 2.64494100  | 0.32157500  | -2.40215600 |
| H | 4.25991800  | 1.06863700  | -2.24035600 |
| C | 4.21879900  | -1.08287100 | -2.05555200 |
| C | 3.46328400  | -2.22793200 | -1.77055700 |
| C | 5.53425000  | -1.23119100 | -2.49544000 |
| C | 4.01647400  | -3.49317200 | -1.93517200 |
| H | 2.44167000  | -2.10356600 | -1.41706000 |
| C | 6.08880700  | -2.50023400 | -2.66090400 |
| H | 6.12702600  | -0.34646500 | -2.71502500 |
| C | 5.33046100  | -3.63317200 | -2.38325000 |
| H | 3.41918400  | -4.37262800 | -1.71310100 |
| H | 7.11282300  | -2.60091100 | -3.00676400 |
| H | 5.76039500  | -4.62140600 | -2.51214000 |
| C | -4.63796100 | 5.04397400  | -0.65853100 |
| H | -5.33464800 | 4.20282100  | -0.73628300 |
| H | -4.93506800 | 5.64388200  | 0.20439100  |
| H | -4.75094100 | 5.65123100  | -1.55916600 |
| C | -0.33040000 | 3.44605900  | -2.75216400 |
| H | 0.69634900  | 3.80806600  | -2.64553400 |
| H | -0.29074600 | 2.36254300  | -2.91058700 |
| H | -0.76687000 | 3.90241100  | -3.64162900 |



|   |             |             |             |
|---|-------------|-------------|-------------|
| C | -0.86684900 | 3.39266900  | 2.26431500  |
| H | -0.79372100 | 2.30273500  | 2.36116000  |
| H | 0.13427700  | 3.80240700  | 2.42029200  |
| H | -1.52573200 | 3.76156300  | 3.05185100  |
| C | -1.91303700 | -0.78532900 | -0.47097400 |
| C | -1.11901800 | 0.46982500  | -0.29883400 |
| H | -1.66755900 | -1.20853300 | -1.45340900 |
| C | -3.41739100 | -0.62289800 | -0.39218100 |
| C | -4.23586800 | -1.57004900 | -1.01778800 |
| C | -4.03055400 | 0.42548300  | 0.30147400  |
| C | -5.62266700 | -1.48095100 | -0.94937900 |
| H | -3.77626300 | -2.38699300 | -1.57045200 |
| C | -5.41879900 | 0.52048800  | 0.36887800  |
| H | -3.42918400 | 1.17352900  | 0.80933300  |
| C | -6.22007500 | -0.43218700 | -0.25406200 |
| H | -6.23570000 | -2.22774700 | -1.44360800 |
| H | -5.87340700 | 1.34213900  | 0.91407900  |
| H | -7.30143800 | -0.35739100 | -0.20078000 |
| C | 0.18349400  | 0.45586500  | -0.71212300 |
| O | 0.81249600  | -0.49786800 | -1.27901600 |
| H | -1.54020800 | 1.32056400  | 0.21133500  |
| C | -0.59792500 | -0.72429000 | 2.69321700  |
| C | -1.24962600 | -0.23162600 | 3.82882600  |
| H | -0.78389200 | 0.31339300  | 4.63424900  |
| C | -2.59153600 | -0.61798600 | 3.74761500  |
| H | -3.37173400 | -0.42150700 | 4.46693400  |
| C | -2.74094300 | -1.32938200 | 2.56599400  |
| H | -3.61574500 | -1.78449400 | 2.13087900  |
| N | -1.54507300 | -1.40674800 | 1.93267100  |
| C | 0.80651100  | -0.69565500 | 2.36839000  |
| O | 1.38461900  | -1.36219100 | 1.52596700  |
| C | 1.70130400  | 0.32099300  | 3.12231000  |
| F | 2.98198300  | -0.02737900 | 3.00120500  |
| F | 1.43730100  | 0.43749200  | 4.42588100  |
| F | 1.56717800  | 1.54539700  | 2.57120600  |
| C | -1.35339100 | -1.85001300 | 0.55684900  |
| H | -0.27962300 | -1.87723900 | 0.37804300  |
| C | -1.91436100 | -3.24366300 | 0.31390400  |
| O | -2.77008000 | -3.72887600 | 1.02861400  |
| C | -1.37780400 | -3.99563400 | -0.86695800 |
| C | -0.33118000 | -3.51377300 | -1.66465600 |
| C | -1.94933700 | -5.24235500 | -1.14764200 |
| C | 0.13874700  | -4.28764500 | -2.72369500 |
| H | 0.11559600  | -2.53611800 | -1.48754500 |

|   |             |             |             |
|---|-------------|-------------|-------------|
| C | -1.47838500 | -6.00611800 | -2.20705200 |
| H | -2.75782600 | -5.59391700 | -0.51540600 |
| C | -0.42915500 | -5.53000300 | -2.99432400 |
| H | 0.95317300  | -3.91206700 | -3.33560500 |
| H | -1.92378500 | -6.97243400 | -2.41981400 |
| H | -0.05751000 | -6.12815300 | -3.82050900 |

**M4RS**

|   |             |             |             |
|---|-------------|-------------|-------------|
| C | 4.26148600  | 1.01013800  | -0.04059300 |
| C | 5.61566100  | 1.66559300  | 0.21641200  |
| H | 4.00582400  | 0.29325500  | 0.73956300  |
| H | 5.72512700  | 1.93126000  | 1.27762900  |
| N | 3.25344700  | 2.08911300  | 0.04277900  |
| O | 5.77630200  | 2.82124100  | -0.59339300 |
| C | 3.54668600  | 3.42359700  | -0.02039800 |
| C | 4.97206200  | 3.88196200  | -0.13339400 |
| H | 5.04230100  | 4.69962800  | -0.85221000 |
| H | 5.31743300  | 4.24260000  | 0.84629600  |
| N | 2.46880900  | 4.14943900  | 0.04809800  |
| C | 1.91067600  | 1.97540700  | 0.11859600  |
| N | 1.45824800  | 3.23191800  | 0.14151600  |
| C | 0.10527000  | 3.67287200  | 0.33503600  |
| C | -0.59830400 | 4.15950900  | -0.76884900 |
| C | -0.43491900 | 3.58646400  | 1.61743700  |
| C | -1.91219900 | 4.56531100  | -0.55558000 |
| C | -1.75167800 | 4.01688500  | 1.78026100  |
| C | -2.50462900 | 4.49568300  | 0.70870200  |
| H | -2.49100300 | 4.93658000  | -1.39774800 |
| H | -2.20184000 | 3.96012300  | 2.76878200  |
| H | 6.40782000  | 0.96485300  | -0.05572700 |
| C | 4.17972000  | 0.31949200  | -1.40878300 |
| H | 3.12419600  | 0.17144100  | -1.65614300 |
| H | 4.62364200  | 0.97772700  | -2.16390700 |
| C | 4.87946900  | -1.01746100 | -1.36437600 |
| C | 4.27497700  | -2.08412600 | -0.68667800 |
| C | 6.13065000  | -1.20395600 | -1.95405200 |
| C | 4.91809700  | -3.31495000 | -0.61082300 |
| H | 3.30037100  | -1.93053500 | -0.22226900 |
| C | 6.77358600  | -2.43847500 | -1.87568900 |
| H | 6.60118100  | -0.37870200 | -2.48386000 |
| C | 6.16766400  | -3.49590800 | -1.20408700 |
| H | 4.43660200  | -4.13522800 | -0.08714000 |
| H | 7.74516300  | -2.57229900 | -2.34104300 |
| H | 6.66559300  | -4.45864600 | -1.14358700 |

|   |             |             |             |
|---|-------------|-------------|-------------|
| C | -3.94399400 | 4.89786400  | 0.89254200  |
| H | -4.60621300 | 4.14122600  | 0.45833500  |
| H | -4.19647600 | 4.99965200  | 1.95039000  |
| H | -4.15675500 | 5.84709500  | 0.39415500  |
| C | 0.04213000  | 4.19871300  | -2.13017700 |
| H | 0.91900200  | 4.85244800  | -2.13392400 |
| H | 0.37556800  | 3.19827900  | -2.42806200 |
| H | -0.66527100 | 4.55958500  | -2.87788200 |
| C | 0.35754700  | 3.00753800  | 2.75923300  |
| H | 0.48129200  | 1.92289700  | 2.63960000  |
| H | 1.35640900  | 3.45112800  | 2.81535700  |
| H | -0.15146400 | 3.18468100  | 3.70783700  |
| C | -0.63980400 | -0.75552700 | -0.65898900 |
| C | -0.02719800 | 0.59738800  | -0.45811000 |
| H | 0.18284700  | -1.46462200 | -0.83190800 |
| C | -1.60400100 | -0.82732800 | -1.82373800 |
| C | -1.57952900 | -1.93159100 | -2.67818300 |
| C | -2.59117100 | 0.14512000  | -2.01279600 |
| C | -2.52207900 | -2.07243000 | -3.69230300 |
| H | -0.81888800 | -2.69558600 | -2.53572100 |
| C | -3.54179700 | 0.00250200  | -3.02033100 |
| H | -2.63907200 | 1.00486700  | -1.34591100 |
| C | -3.51212100 | -1.10784400 | -3.86102800 |
| H | -2.49018300 | -2.94063100 | -4.34286100 |
| H | -4.31593700 | 0.75400800  | -3.13950100 |
| H | -4.25730400 | -1.22100700 | -4.64189500 |
| C | 1.20157400  | 0.65246900  | 0.14031500  |
| O | 1.88100700  | -0.30759200 | 0.62672500  |
| H | -0.51483400 | 1.48155400  | -0.84655600 |
| C | -3.83700000 | -0.78781800 | 0.62883500  |
| C | -4.61319500 | 0.30470900  | 1.01321100  |
| H | -5.68200100 | 0.38657300  | 0.88311300  |
| C | -3.75719400 | 1.24812900  | 1.59342100  |
| H | -4.02895200 | 2.20236400  | 2.01958500  |
| C | -2.47519200 | 0.71728000  | 1.55047100  |
| H | -1.53785400 | 1.11335200  | 1.90216200  |
| N | -2.52108000 | -0.51392600 | 0.98624200  |
| C | -4.27240600 | -1.96495100 | -0.08774000 |
| C | -1.36622500 | -1.32167100 | 0.61970500  |
| H | -1.76819300 | -2.29581800 | 0.35343600  |
| C | -0.37722700 | -1.50658300 | 1.76786200  |
| O | -0.33634000 | -0.74409500 | 2.71227900  |
| C | 0.54178400  | -2.68854700 | 1.68043200  |
| C | 0.30953700  | -3.77726900 | 0.83680300  |

|   |             |             |             |
|---|-------------|-------------|-------------|
| C | 1.68014700  | -2.67907200 | 2.49387300  |
| C | 1.20374000  | -4.84617200 | 0.81066100  |
| H | -0.56834500 | -3.81893900 | 0.19918100  |
| C | 2.57153100  | -3.74108500 | 2.46475000  |
| H | 1.85291900  | -1.81042200 | 3.11944500  |
| C | 2.33112100  | -4.83109900 | 1.62486100  |
| H | 1.01216000  | -5.69125600 | 0.15776400  |
| H | 3.45807900  | -3.72409000 | 3.09063900  |
| H | 3.02463700  | -5.66674800 | 1.60688600  |
| C | -5.75743600 | -1.94377100 | -0.52816500 |
| F | -6.57290200 | -1.87806200 | 0.53741900  |
| F | -6.05852000 | -3.04196100 | -1.20979900 |
| F | -6.02916800 | -0.88391400 | -1.30276300 |
| O | -3.62214500 | -2.95169000 | -0.38128700 |

**M4SR**

|   |             |             |             |
|---|-------------|-------------|-------------|
| C | 4.09508000  | 0.90707500  | 0.33908200  |
| C | 5.45286400  | 1.57479400  | 0.52190400  |
| H | 3.87938000  | 0.19782600  | 1.13888900  |
| H | 5.55078700  | 1.96565800  | 1.54473400  |
| N | 3.10136500  | 1.99861800  | 0.45754000  |
| O | 5.61455300  | 2.62428600  | -0.42274600 |
| C | 3.39300200  | 3.30179400  | 0.15580900  |
| C | 4.80838400  | 3.73518600  | -0.10472600 |
| H | 4.83546600  | 4.42808800  | -0.94689000 |
| H | 5.18970600  | 4.25157100  | 0.78841700  |
| N | 2.32506200  | 4.04467100  | 0.18664500  |
| C | 1.77152700  | 1.91904600  | 0.66557700  |
| N | 1.32461100  | 3.17238800  | 0.51060400  |
| C | -0.02938300 | 3.63810500  | 0.64004100  |
| C | -0.77199800 | 3.81766000  | -0.52726300 |
| C | -0.55592600 | 3.80427200  | 1.92129000  |
| C | -2.11137800 | 4.17523600  | -0.38160700 |
| C | -1.89932600 | 4.15863900  | 2.01375000  |
| C | -2.69218600 | 4.33383400  | 0.87792300  |
| H | -2.71933100 | 4.31045100  | -1.27272700 |
| H | -2.34313900 | 4.28253100  | 2.99835400  |
| H | 6.24883100  | 0.85220400  | 0.34304900  |
| C | 3.89305800  | 0.24758100  | -1.03781700 |
| H | 2.88435400  | -0.18146100 | -1.04681400 |
| H | 3.94767500  | 1.03465900  | -1.79877900 |
| C | 4.90922200  | -0.82727500 | -1.33695100 |
| C | 4.61052300  | -2.17097800 | -1.10110300 |
| C | 6.16638600  | -0.49171100 | -1.85108400 |

|   |             |             |             |
|---|-------------|-------------|-------------|
| C | 5.56077000  | -3.15837500 | -1.35332300 |
| H | 3.61644400  | -2.43703000 | -0.75190100 |
| C | 7.11550500  | -1.47772700 | -2.10355400 |
| H | 6.39526800  | 0.55237600  | -2.05645800 |
| C | 6.81564000  | -2.81472300 | -1.84900300 |
| H | 5.31519300  | -4.19955400 | -1.16855600 |
| H | 8.08645800  | -1.20322700 | -2.50399200 |
| H | 7.55434600  | -3.58523900 | -2.04571100 |
| C | -4.15828400 | 4.64665500  | 1.01911200  |
| H | -4.70567000 | 3.74478800  | 1.31291400  |
| H | -4.32904700 | 5.40286900  | 1.78946900  |
| H | -4.58082500 | 5.00791800  | 0.07926300  |
| C | -0.15808400 | 3.55348100  | -1.87600000 |
| H | 0.70171100  | 4.20438200  | -2.05812100 |
| H | 0.19179900  | 2.51537700  | -1.93714900 |
| H | -0.89052200 | 3.70972100  | -2.66923500 |
| C | 0.28289900  | 3.54739900  | 3.14281700  |
| H | 1.26284100  | 4.02662200  | 3.06188400  |
| H | -0.21468300 | 3.92494500  | 4.03724800  |
| H | 0.44406600  | 2.47105500  | 3.27121400  |
| C | -1.08488300 | -0.60936200 | 1.05674800  |
| C | -0.26048100 | 0.58457500  | 0.70404900  |
| H | -0.67416800 | -1.05350800 | 1.97272400  |
| C | -2.55282300 | -0.29659300 | 1.27175600  |
| C | -3.26751800 | -0.97616700 | 2.26080700  |
| C | -3.24143900 | 0.59019700  | 0.43870500  |
| C | -4.63563700 | -0.77780600 | 2.42004800  |
| H | -2.74291300 | -1.68014000 | 2.90292700  |
| C | -4.61285000 | 0.78488600  | 0.58922000  |
| H | -2.71531200 | 1.11078900  | -0.35878600 |
| C | -5.31435900 | 0.10208000  | 1.58068200  |
| H | -5.17289100 | -1.31691900 | 3.19383300  |
| H | -5.13564900 | 1.45950500  | -0.08254000 |
| H | -6.38343900 | 0.25123300  | 1.69450700  |
| C | 1.05871300  | 0.64795300  | 1.06128100  |
| O | 1.78072100  | -0.20716800 | 1.65995500  |
| H | -0.73020700 | 1.40335100  | 0.18212700  |
| C | -2.72225800 | -1.45886800 | -1.83476900 |
| C | -2.81889500 | -0.70507100 | -3.00285800 |
| H | -3.69226300 | -0.64606100 | -3.63523300 |
| C | -1.58599600 | -0.06998400 | -3.19987200 |
| H | -1.30552700 | 0.57367400  | -4.02007700 |
| C | -0.76224300 | -0.44370600 | -2.14775000 |
| H | 0.25704900  | -0.18013200 | -1.92149400 |

|   |             |             |             |
|---|-------------|-------------|-------------|
| N | -1.43687900 | -1.29325900 | -1.33122700 |
| C | -3.76010700 | -2.24220200 | -1.20299400 |
| C | -0.98455500 | -1.75425100 | -0.02519400 |
| H | -1.67022000 | -2.54134800 | 0.27722100  |
| C | 0.43284700  | -2.30186300 | -0.02371600 |
| O | 1.27117600  | -1.95202200 | -0.83159400 |
| C | 0.76339000  | -3.26139400 | 1.07560500  |
| C | -0.14795400 | -4.21641400 | 1.53668600  |
| C | 2.04700300  | -3.20096700 | 1.62715800  |
| C | 0.23251300  | -5.11357300 | 2.53218400  |
| H | -1.14410300 | -4.29049400 | 1.10964500  |
| C | 2.41742000  | -4.08961300 | 2.62676300  |
| H | 2.71050500  | -2.41274500 | 1.28959200  |
| C | 1.51122400  | -5.04987000 | 3.07775800  |
| H | -0.47174000 | -5.86222200 | 2.87968600  |
| H | 3.40885900  | -4.02953200 | 3.06389600  |
| H | 1.80168600  | -5.74486300 | 3.85950400  |
| O | -3.65837000 | -2.99238300 | -0.24960500 |
| C | -5.16385000 | -2.09879600 | -1.84230000 |
| F | -5.55128500 | -0.81825200 | -1.91775300 |
| F | -5.16608300 | -2.58951900 | -3.09298000 |
| F | -6.06929600 | -2.76378500 | -1.13623100 |

**M4SS**

|   |             |             |             |
|---|-------------|-------------|-------------|
| C | -3.52436500 | -1.90417900 | 0.77641000  |
| C | -4.59413100 | -2.91011500 | 1.18924400  |
| H | -3.36116900 | -1.15023900 | 1.54381600  |
| H | -4.43249100 | -3.25654600 | 2.22010400  |
| N | -2.25800900 | -2.66410900 | 0.63879000  |
| O | -4.61126800 | -4.01727200 | 0.29933700  |
| C | -2.22866000 | -4.01491300 | 0.42445800  |
| C | -3.48351100 | -4.83725600 | 0.48765600  |
| H | -3.47052100 | -5.58974900 | -0.30223800 |
| H | -3.52794400 | -5.34862700 | 1.46062500  |
| N | -1.01707700 | -4.43594900 | 0.20969200  |
| C | -0.98715500 | -2.20803300 | 0.53866600  |
| N | -0.25575200 | -3.30587000 | 0.28788000  |
| C | 1.15424600  | -3.38930700 | 0.02120000  |
| C | 1.57644800  | -3.18138800 | -1.29083100 |
| C | 2.02777800  | -3.56900900 | 1.09461200  |
| C | 2.95133200  | -3.14778400 | -1.51984700 |
| C | 3.39129900  | -3.53568900 | 0.81461700  |
| C | 3.86792600  | -3.30852100 | -0.48051000 |
| H | 3.30927400  | -2.96688700 | -2.53028600 |

|   |             |             |             |
|---|-------------|-------------|-------------|
| H | 4.09972300  | -3.65685500 | 1.63087200  |
| H | -5.57269900 | -2.42983100 | 1.12569800  |
| C | -3.84156300 | -1.22149200 | -0.56040200 |
| H | -2.92359500 | -0.73866100 | -0.90727900 |
| H | -4.14689700 | -1.98821200 | -1.28162000 |
| C | -4.91296300 | -0.17402400 | -0.39219800 |
| C | -4.58935700 | 1.03435900  | 0.23684100  |
| C | -6.22034700 | -0.38721500 | -0.83127800 |
| C | -5.56343200 | 2.01335100  | 0.41096400  |
| H | -3.56470100 | 1.18956400  | 0.57149600  |
| C | -7.19608800 | 0.59267900  | -0.65282600 |
| H | -6.47305700 | -1.32441500 | -1.32229400 |
| C | -6.86774200 | 1.79440300  | -0.03247600 |
| H | -5.30104200 | 2.95209800  | 0.88803400  |
| H | -8.20896700 | 0.41748800  | -1.00204400 |
| H | -7.62467000 | 2.56044400  | 0.10379000  |
| C | 5.34925900  | -3.19267900 | -0.72879300 |
| H | 5.73246500  | -2.26230500 | -0.29476600 |
| H | 5.89426900  | -4.02153400 | -0.26930000 |
| H | 5.57385300  | -3.18183900 | -1.79801200 |
| C | 0.57553400  | -2.91582800 | -2.37940700 |
| H | -0.13635400 | -3.74111000 | -2.47695800 |
| H | 0.01315700  | -2.00671800 | -2.13923300 |
| H | 1.07588200  | -2.76069000 | -3.33574000 |
| C | 1.50187200  | -3.68504600 | 2.49832500  |
| H | 1.08903700  | -2.71954000 | 2.81422900  |
| H | 0.70619900  | -4.43185700 | 2.56855500  |
| H | 2.29987100  | -3.95795300 | 3.19026800  |
| C | 1.16300500  | 0.97290200  | 0.70194500  |
| C | 0.72194800  | -0.44071900 | 0.56237400  |
| H | 0.35686600  | 1.53053200  | 1.19064500  |
| C | 2.44368900  | 1.18722000  | 1.49288400  |
| C | 2.66511000  | 2.43039900  | 2.09286100  |
| C | 3.44108200  | 0.21331400  | 1.58602600  |
| C | 3.86029800  | 2.70159000  | 2.75339500  |
| H | 1.89409900  | 3.19347200  | 2.01963400  |
| C | 4.64166100  | 0.48598100  | 2.23610800  |
| H | 3.29274900  | -0.76363800 | 1.13321300  |
| C | 4.85733900  | 1.73144700  | 2.82090200  |
| H | 4.01277500  | 3.67311800  | 3.21385100  |
| H | 5.41091500  | -0.27953200 | 2.28632900  |
| H | 5.79337900  | 1.94228300  | 3.32874500  |
| C | -0.60634000 | -0.74953900 | 0.71279900  |
| O | -1.57455600 | 0.02011000  | 0.99282400  |

|   |             |             |             |
|---|-------------|-------------|-------------|
| H | 1.44552600  | -1.17748200 | 0.25921600  |
| C | -0.99935400 | 2.67703300  | -0.92986400 |
| C | -2.18642300 | 2.37314800  | -1.59671500 |
| H | -3.11636000 | 2.91387200  | -1.50077900 |
| C | -1.94270000 | 1.25715200  | -2.39910100 |
| H | -2.64048900 | 0.76211100  | -3.05819100 |
| C | -0.61803700 | 0.89085600  | -2.19968400 |
| H | -0.04300600 | 0.09429300  | -2.63710800 |
| N | -0.03535000 | 1.75540600  | -1.33372700 |
| C | -0.77316700 | 3.74328800  | 0.00584500  |
| O | 0.27624400  | 4.06533900  | 0.54026100  |
| C | -2.03290100 | 4.56184700  | 0.38210700  |
| F | -1.72622300 | 5.52455300  | 1.24250700  |
| F | -2.96321100 | 3.77772700  | 0.94947100  |
| F | -2.59147200 | 5.13228000  | -0.69629400 |
| C | 1.29155400  | 1.66383400  | -0.72382600 |
| H | 1.62671100  | 2.68520100  | -0.55820500 |
| C | 2.31704000  | 0.89876200  | -1.54749100 |
| O | 2.01381100  | -0.05984700 | -2.23767000 |
| C | 3.76258000  | 1.25327200  | -1.37633400 |
| C | 4.21352100  | 2.48484500  | -0.89290300 |
| C | 4.69270800  | 0.25506600  | -1.69046300 |
| C | 5.57578400  | 2.70592200  | -0.71512200 |
| H | 3.51733100  | 3.27713500  | -0.64073200 |
| C | 6.05077400  | 0.47622800  | -1.50794800 |
| H | 4.32124100  | -0.69755500 | -2.05582100 |
| C | 6.49383400  | 1.70358100  | -1.01538600 |
| H | 5.91846600  | 3.66160500  | -0.33280600 |
| H | 6.76509700  | -0.30650600 | -1.74497500 |
| H | 7.55470600  | 1.87821200  | -0.86598700 |

#### TS4<sup>Rot</sup>RS

|   |             |            |            |
|---|-------------|------------|------------|
| C | -4.17173100 | 0.88166500 | 1.20554700 |
| C | -5.54814200 | 1.53538500 | 1.31997500 |
| H | -4.08924300 | 0.27115000 | 0.30383200 |
| H | -5.89372900 | 1.89038900 | 0.33900400 |
| N | -3.20694700 | 1.98113800 | 1.03426000 |
| O | -5.51194300 | 2.61472300 | 2.24301500 |
| C | -3.46136800 | 3.30477400 | 1.26042700 |
| C | -4.82846200 | 3.72844200 | 1.71356800 |
| H | -4.74487600 | 4.48060300 | 2.49919500 |
| H | -5.37744600 | 4.16184500 | 0.86515300 |
| N | -2.40917100 | 4.03412400 | 1.02217700 |
| C | -1.91594400 | 1.87464600 | 0.67475300 |



|   |             |             |             |
|---|-------------|-------------|-------------|
| N | -1.45424900 | 3.12367400  | 0.65076000  |
| C | -0.19493400 | 3.55952800  | 0.11179200  |
| C | 0.76367500  | 4.08412500  | 0.97657500  |
| C | -0.01508600 | 3.45113000  | -1.27201800 |
| C | 1.96404600  | 4.51277600  | 0.40907500  |
| C | 1.20351200  | 3.88653500  | -1.78507100 |
| C | 2.20183300  | 4.41501500  | -0.96218400 |
| H | 2.73404000  | 4.92083200  | 1.05917600  |
| H | 1.38241200  | 3.79896700  | -2.85355600 |
| H | -6.26241900 | 0.80397600  | 1.70353600  |
| C | -3.79817500 | 0.03691500  | 2.43170700  |
| H | -2.70827500 | -0.07556600 | 2.45862400  |
| H | -4.10583800 | 0.57080100  | 3.33752300  |
| C | -4.44145400 | -1.32531600 | 2.34338600  |
| C | -3.98230200 | -2.22492300 | 1.37342600  |
| C | -5.49366000 | -1.69910300 | 3.17869100  |
| C | -4.56761500 | -3.48026800 | 1.25197900  |
| H | -3.16897000 | -1.91850000 | 0.71438500  |
| C | -6.07953800 | -2.95874700 | 3.05590600  |
| H | -5.85214700 | -1.00354000 | 3.93380900  |
| C | -5.61686300 | -3.85062500 | 2.09331400  |
| H | -4.20313400 | -4.17338900 | 0.50015400  |
| H | -6.89613200 | -3.24113800 | 3.71289900  |
| H | -6.07106000 | -4.83178000 | 1.99735600  |
| C | 3.52487800  | 4.82595800  | -1.55256800 |
| H | 4.11815000  | 5.40256500  | -0.83941400 |
| H | 4.10077800  | 3.93854600  | -1.83506900 |
| H | 3.38440000  | 5.42901200  | -2.45342700 |
| C | 0.50400700  | 4.17759500  | 2.45615200  |
| H | -0.28627200 | 4.90386500  | 2.66809400  |
| H | 0.17713400  | 3.21434600  | 2.86172800  |
| H | 1.40732400  | 4.48314000  | 2.98587600  |
| C | -1.09349300 | 2.88589100  | -2.15728200 |
| H | -1.26704600 | 1.82568800  | -1.94382800 |
| H | -2.03572900 | 3.42601700  | -2.01322400 |
| H | -0.80278500 | 2.97083800  | -3.20515200 |
| C | 0.58864900  | -1.00105300 | 0.85318000  |
| C | -0.07304800 | 0.33617900  | 0.99519800  |
| H | -0.19525700 | -1.72600600 | 0.59460400  |
| C | 1.29772800  | -1.47329900 | 2.10646000  |
| C | 1.12847700  | -2.78699600 | 2.54684400  |
| C | 2.16800300  | -0.63520900 | 2.81104200  |
| C | 1.80290800  | -3.25654000 | 3.67072900  |
| H | 0.45665600  | -3.44669500 | 2.00242000  |

|   |             |             |             |
|---|-------------|-------------|-------------|
| C | 2.84470300  | -1.10321700 | 3.93261900  |
| H | 2.33243900  | 0.38526300  | 2.46975000  |
| C | 2.66323300  | -2.41383000 | 4.36742600  |
| H | 1.65487300  | -4.27997000 | 4.00124600  |
| H | 3.52152700  | -0.44257800 | 4.46599200  |
| H | 3.19218300  | -2.77623700 | 5.24340400  |
| C | -1.25393900 | 0.56564600  | 0.35111300  |
| O | -1.93757400 | -0.19143300 | -0.41430100 |
| H | 0.37796900  | 1.10832300  | 1.60881500  |
| C | 3.99279700  | -0.60565800 | 0.20743000  |
| C | 4.78362000  | 0.49563800  | 0.44053800  |
| H | 5.82547200  | 0.47097500  | 0.72518100  |
| C | 3.96466800  | 1.63571200  | 0.23783100  |
| H | 4.25536300  | 2.67112500  | 0.34084700  |
| C | 2.71310500  | 1.18904400  | -0.12641300 |
| H | 1.80919300  | 1.71499800  | -0.38404700 |
| N | 2.73452000  | -0.18048600 | -0.15520800 |
| C | 4.34317700  | -2.04815300 | 0.31754700  |
| C | 1.59779700  | -1.06249600 | -0.35316600 |
| H | 1.98657700  | -2.08315200 | -0.38429200 |
| C | 0.83551200  | -0.77613500 | -1.64395500 |
| O | 0.73870700  | 0.35198800  | -2.08094200 |
| C | 0.14138100  | -1.92978800 | -2.29757700 |
| C | 0.71385100  | -3.20270900 | -2.36772500 |
| C | -1.10299800 | -1.69349500 | -2.89133700 |
| C | 0.04736200  | -4.23055900 | -3.03116900 |
| H | 1.69696800  | -3.39272900 | -1.94967000 |
| C | -1.77078400 | -2.72476300 | -3.53765100 |
| H | -1.54263300 | -0.70812500 | -2.78699700 |
| C | -1.19550800 | -3.99388300 | -3.61012800 |
| H | 0.50253000  | -5.21321500 | -3.09815300 |
| H | -2.74398000 | -2.54467900 | -3.98293900 |
| H | -1.71746400 | -4.79811700 | -4.11927000 |
| C | 4.93745400  | -2.66615000 | -0.96353300 |
| F | 4.01377000  | -2.59751700 | -1.94082000 |
| F | 5.27453100  | -3.93840000 | -0.79618600 |
| F | 6.01247900  | -1.98660200 | -1.36768200 |
| O | 4.18453800  | -2.74589500 | 1.28397400  |

**TS4<sup>Rot</sup>SR**

|   |            |             |             |
|---|------------|-------------|-------------|
| C | 4.57472400 | -2.82789400 | -2.64422300 |
| C | 6.07148500 | -2.79016300 | -2.93094000 |
| H | 4.26596700 | -3.77967800 | -2.20952100 |
| H | 6.63717600 | -3.13624400 | -2.05417300 |

|   |              |              |              |
|---|--------------|--------------|--------------|
| N | 4. 34739700  | -1. 79702500 | -1. 60795000 |
| O | 6. 46981100  | -1. 47213400 | -3. 28323300 |
| C | 5. 16827500  | -0. 71701900 | -1. 42669700 |
| C | 6. 47356400  | -0. 61548400 | -2. 16449000 |
| H | 6. 62417300  | 0. 40563400  | -2. 51781400 |
| H | 7. 29130400  | -0. 87459000 | -1. 47604500 |
| N | 4. 68063600  | 0. 10295400  | -0. 54117900 |
| C | 3. 27543200  | -1. 62957200 | -0. 81022200 |
| N | 3. 50368400  | -0. 48071400 | -0. 16151200 |
| C | 2. 67854500  | 0. 13403900  | 0. 84471100  |
| C | 1. 86275400  | 1. 19981100  | 0. 46497900  |
| C | 2. 67942000  | -0. 41353800 | 2. 12889900  |
| C | 1. 00803600  | 1. 72561300  | 1. 43313200  |
| C | 1. 80589200  | 0. 14490800  | 3. 05798800  |
| C | 0. 95770400  | 1. 20331100  | 2. 72563200  |
| H | 0. 35322500  | 2. 55009800  | 1. 16248500  |
| H | 1. 77448300  | -0. 26781800 | 4. 06331800  |
| H | 6. 30335700  | -3. 43561200 | -3. 77818300 |
| C | 3. 69583500  | -2. 48079500 | -3. 85849800 |
| H | 2. 65336200  | -2. 46580400 | -3. 51946000 |
| H | 3. 97038300  | -1. 47571300 | -4. 19857600 |
| C | 3. 84906500  | -3. 47584400 | -4. 98212100 |
| C | 2. 99339500  | -4. 57696900 | -5. 06268900 |
| C | 4. 85348700  | -3. 32429100 | -5. 94342800 |
| C | 3. 15091800  | -5. 51851500 | -6. 07668900 |
| H | 2. 18341900  | -4. 66776200 | -4. 34421200 |
| C | 5. 01084600  | -4. 26497900 | -6. 95782300 |
| H | 5. 51094200  | -2. 45823700 | -5. 89596600 |
| C | 4. 16167700  | -5. 36767000 | -7. 02307200 |
| H | 2. 47642500  | -6. 36749500 | -6. 13007400 |
| H | 5. 79155800  | -4. 13363800 | -7. 70042500 |
| H | 4. 28211300  | -6. 10084100 | -7. 81425000 |
| C | -0. 01745900 | 1. 73693900  | 3. 74138400  |
| H | -0. 45952600 | 2. 67953900  | 3. 41187100  |
| H | -0. 82788000 | 1. 01619200  | 3. 89354600  |
| H | 0. 46754800  | 1. 90041300  | 4. 70734200  |
| C | 1. 85309400  | 1. 69845500  | -0. 95521800 |
| H | 2. 86118900  | 1. 94001700  | -1. 30205400 |
| H | 1. 44434700  | 0. 93096700  | -1. 62441200 |
| H | 1. 22870500  | 2. 58863600  | -1. 04513600 |
| C | 3. 55070800  | -1. 59171900 | 2. 46971800  |
| H | 4. 57755800  | -1. 44185600 | 2. 12329300  |
| H | 3. 57050300  | -1. 75382400 | 3. 54837700  |
| H | 3. 16598100  | -2. 50191300 | 1. 99600100  |

|   |             |             |             |
|---|-------------|-------------|-------------|
| C | -0.25662900 | -2.94149500 | -0.11150900 |
| C | 0.94295200  | -2.08766100 | -0.36796000 |
| H | 0.08969600  | -3.92954200 | 0.22020100  |
| C | -1.16025000 | -2.34698000 | 0.95152400  |
| C | -1.68110100 | -3.15502100 | 1.96280600  |
| C | -1.50961800 | -0.99215200 | 0.92674400  |
| C | -2.52166000 | -2.62534100 | 2.93870300  |
| H | -1.41856600 | -4.21002300 | 1.98793000  |
| C | -2.34995900 | -0.46115700 | 1.89980300  |
| H | -1.13421200 | -0.34623700 | 0.13502200  |
| C | -2.85617800 | -1.27467100 | 2.91125800  |
| H | -2.91299700 | -3.26889300 | 3.72049700  |
| H | -2.61453500 | 0.59199000  | 1.86338900  |
| H | -3.51341300 | -0.85935800 | 3.66909600  |
| C | 2.15637500  | -2.63298200 | -0.67778400 |
| O | 2.49138900  | -3.84224500 | -0.87439400 |
| H | 0.84334600  | -1.01986900 | -0.24569300 |
| C | -2.92015200 | -1.57065500 | -1.86541800 |
| C | -3.03520100 | -0.31517300 | -2.41559500 |
| H | -3.94590800 | 0.26279200  | -2.47393700 |
| C | -1.74569300 | 0.04567200  | -2.88322400 |
| H | -1.47226900 | 0.96299200  | -3.38336900 |
| C | -0.89838100 | -1.00584700 | -2.61506100 |
| H | 0.14719500  | -1.15608000 | -2.82365900 |
| N | -1.61802300 | -1.99884200 | -2.00051000 |
| C | -3.97117900 | -2.41622000 | -1.23402100 |
| C | -1.09787200 | -3.22132100 | -1.41359500 |
| H | -1.95645900 | -3.82905500 | -1.11520400 |
| C | -0.22453600 | -4.02810000 | -2.36636200 |
| O | 0.47736600  | -3.48620400 | -3.19553500 |
| C | -0.20496800 | -5.51093400 | -2.17050600 |
| C | -1.38703500 | -6.24268500 | -2.02720100 |
| C | 1.02977400  | -6.16790000 | -2.18333600 |
| C | -1.33423600 | -7.62976900 | -1.91560300 |
| H | -2.35055300 | -5.74252500 | -2.04710800 |
| C | 1.07568700  | -7.55056400 | -2.05337800 |
| H | 1.93054600  | -5.56531400 | -2.23465500 |
| C | -0.10461700 | -8.28235900 | -1.92464800 |
| H | -2.25383500 | -8.19832400 | -1.82408500 |
| H | 2.03369600  | -8.06044400 | -2.04487900 |
| H | -0.06495800 | -9.36280700 | -1.82742900 |
| O | -4.23734800 | -2.46959100 | -0.06272800 |
| C | -4.76119200 | -3.29704000 | -2.22288100 |
| F | -5.39793600 | -2.54123300 | -3.12023300 |

|   |             |             |             |
|---|-------------|-------------|-------------|
| F | -3.89974000 | -4.08991100 | -2.88672200 |
| F | -5.64736800 | -4.06726400 | -1.60589000 |

**M4<sup>Rot</sup>RS**

|   |             |             |             |
|---|-------------|-------------|-------------|
| C | 1.10285100  | -2.04914600 | -3.54936400 |
| C | 1.93442300  | -2.77990900 | -4.60026500 |
| H | 0.99352100  | -2.64136200 | -2.64137500 |
| H | 2.80718600  | -3.26508200 | -4.13998600 |
| N | 1.87753400  | -0.84633800 | -3.16728300 |
| O | 2.35564600  | -1.88360900 | -5.61754800 |
| C | 2.92440500  | -0.34645600 | -3.89257800 |
| C | 3.37373300  | -1.02971200 | -5.15188100 |
| H | 3.57499700  | -0.28568200 | -5.92384600 |
| H | 4.29822800  | -1.59030200 | -4.95120000 |
| N | 3.42256200  | 0.71818800  | -3.33421700 |
| C | 1.68888700  | -0.02267000 | -2.11454900 |
| N | 2.64756000  | 0.90245800  | -2.22281300 |
| C | 2.97646800  | 1.94665500  | -1.29248400 |
| C | 2.60705900  | 3.25628900  | -1.61078500 |
| C | 3.64484900  | 1.59688000  | -0.12026200 |
| C | 2.92732900  | 4.24818000  | -0.68931600 |
| C | 3.95178300  | 2.63079900  | 0.76631700  |
| C | 3.59485400  | 3.95243000  | 0.50360300  |
| H | 2.64516800  | 5.27623900  | -0.90310000 |
| H | 4.47003700  | 2.38857800  | 1.69114800  |
| H | 1.31524900  | -3.54421400 | -5.07468900 |
| C | -0.28614900 | -1.64548200 | -4.06019400 |
| H | -0.68456800 | -0.87377300 | -3.39583100 |
| H | -0.18462900 | -1.22269500 | -5.06580700 |
| C | -1.21255700 | -2.83825200 | -4.05740100 |
| C | -1.68782500 | -3.33489300 | -2.83653000 |
| C | -1.57988400 | -3.47483000 | -5.24330000 |
| C | -2.52219800 | -4.44768000 | -2.81478600 |
| H | -1.39505800 | -2.83426700 | -1.91346800 |
| C | -2.41645200 | -4.58999200 | -5.21894500 |
| H | -1.21439400 | -3.08967300 | -6.19258500 |
| C | -2.88878900 | -5.07762200 | -4.00413700 |
| H | -2.88833400 | -4.82031500 | -1.86268100 |
| H | -2.69933500 | -5.07415300 | -6.14844600 |
| H | -3.54128600 | -5.94486400 | -3.98367800 |
| C | 3.89716400  | 5.04932400  | 1.49048500  |
| H | 4.39100300  | 5.89323100  | 1.00149300  |
| H | 2.97146500  | 5.42505600  | 1.93846700  |
| H | 4.54357900  | 4.69314700  | 2.29549900  |

|   |              |              |              |
|---|--------------|--------------|--------------|
| C | 1. 85783200  | 3. 55354400  | -2. 88182900 |
| H | 2. 44595800  | 3. 27453600  | -3. 76071400 |
| H | 0. 92120700  | 2. 98579800  | -2. 91679400 |
| H | 1. 61624000  | 4. 61520000  | -2. 94654400 |
| C | 3. 96699200  | 0. 16165200  | 0. 19965400  |
| H | 4. 66665500  | 0. 10484800  | 1. 03489900  |
| H | 3. 05900600  | -0. 38666000 | 0. 48430700  |
| H | 4. 41305900  | -0. 34750400 | -0. 65992200 |
| C | -1. 09419100 | 0. 76140900  | 0. 38169000  |
| C | 0. 11471800  | 0. 91528000  | -0. 48615000 |
| H | -1. 73418700 | -0. 00586200 | -0. 07938500 |
| C | -1. 90234200 | 2. 02807400  | 0. 58361300  |
| C | -3. 28586900 | 1. 93261600  | 0. 75701800  |
| C | -1. 29652100 | 3. 28003300  | 0. 72132200  |
| C | -4. 04986300 | 3. 05588800  | 1. 06054100  |
| H | -3. 76663900 | 0. 96145100  | 0. 65917200  |
| C | -2. 05784300 | 4. 40503800  | 1. 02719300  |
| H | -0. 21725200 | 3. 37703500  | 0. 62899600  |
| C | -3. 43524900 | 4. 29784300  | 1. 19847600  |
| H | -5. 12300700 | 2. 95980300  | 1. 19226100  |
| H | -1. 56975100 | 5. 36756400  | 1. 14481900  |
| H | -4. 02514500 | 5. 17490600  | 1. 44411400  |
| C | 0. 58836700  | -0. 20628400 | -1. 11006600 |
| O | 0. 15329100  | -1. 39749800 | -1. 00637500 |
| H | 0. 54479900  | 1. 89025300  | -0. 66490600 |
| C | -0. 65935000 | 1. 93998000  | 3. 63508900  |
| C | 0. 26687300  | 2. 92303000  | 3. 96089700  |
| H | 0. 10851300  | 3. 67284300  | 4. 72217600  |
| C | 1. 40984400  | 2. 70705600  | 3. 17742900  |
| H | 2. 33302500  | 3. 26744700  | 3. 19446500  |
| C | 1. 14837500  | 1. 60757800  | 2. 37647700  |
| H | 1. 74011600  | 1. 13600700  | 1. 61009200  |
| N | -0. 09265700 | 1. 12858500  | 2. 65919400  |
| C | -1. 93046200 | 1. 81414000  | 4. 33138700  |
| C | -0. 80327200 | 0. 17646800  | 1. 81680600  |
| H | -1. 78273800 | 0. 03465300  | 2. 25683900  |
| C | -0. 08521900 | -1. 17073600 | 1. 74907800  |
| O | 1. 12142800  | -1. 23378200 | 1. 87567600  |
| C | -0. 91029500 | -2. 39724400 | 1. 50968700  |
| C | -2. 28507200 | -2. 45888800 | 1. 74539100  |
| C | -0. 24308400 | -3. 52974000 | 1. 02940500  |
| C | -2. 98445000 | -3. 63955000 | 1. 49648400  |
| H | -2. 82776300 | -1. 60954200 | 2. 14603500  |
| C | -0. 93956700 | -4. 70159000 | 0. 77861200  |

|   |             |             |            |
|---|-------------|-------------|------------|
| H | 0.82053900  | -3.45024300 | 0.83645200 |
| C | -2.31584700 | -4.75855600 | 1.01349000 |
| H | -4.05147400 | -3.68195000 | 1.68839700 |
| H | -0.41809900 | -5.57283800 | 0.39499800 |
| H | -2.86209000 | -5.67721900 | 0.82101900 |
| O | -2.44864600 | 2.73972700  | 4.92320100 |
| C | -2.63902100 | 0.44464500  | 4.48313800 |
| F | -1.77809000 | -0.58332900 | 4.44852800 |
| F | -3.29326000 | 0.39455000  | 5.63549100 |
| F | -3.53889000 | 0.25030500  | 3.49695800 |

#### M4<sup>Rot</sup>SR

|   |             |             |             |
|---|-------------|-------------|-------------|
| C | -4.11401900 | 0.62361200  | -0.86455600 |
| C | -5.41773300 | 1.37502400  | -1.11562500 |
| H | -3.77772400 | 0.09596300  | -1.75550700 |
| H | -5.37926200 | 1.92321700  | -2.06801400 |
| N | -3.08608700 | 1.64947900  | -0.56864300 |
| O | -5.69370300 | 2.26954200  | -0.04823600 |
| C | -3.39906000 | 2.91785600  | -0.16632500 |
| C | -4.82641500 | 3.37654500  | -0.07612300 |
| H | -4.97220100 | 3.94815700  | 0.84154500  |
| H | -5.04618700 | 4.02762700  | -0.93504300 |
| N | -2.32853300 | 3.62028000  | 0.06087500  |
| C | -1.73769700 | 1.54160000  | -0.56589700 |
| N | -1.30368700 | 2.75883600  | -0.20031600 |
| C | 0.04586000  | 3.24334800  | -0.07885900 |
| C | 0.57572500  | 3.38934200  | 1.20586400  |
| C | 0.76881700  | 3.50825700  | -1.24349900 |
| C | 1.90679200  | 3.79133900  | 1.30099200  |
| C | 2.09453900  | 3.91064300  | -1.09171200 |
| C | 2.67996900  | 4.04875900  | 0.16678300  |
| H | 2.35209900  | 3.89522200  | 2.28748400  |
| H | 2.68912500  | 4.09879200  | -1.98182200 |
| H | -6.23735000 | 0.65475200  | -1.15417600 |
| C | -4.21123500 | -0.35502100 | 0.30974300  |
| H | -3.19284000 | -0.62025200 | 0.60290400  |
| H | -4.69259900 | 0.15112000  | 1.15379500  |
| C | -4.96851800 | -1.59555700 | -0.09147600 |
| C | -4.36196800 | -2.50827300 | -0.96385600 |
| C | -6.26218800 | -1.84729200 | 0.36727700  |
| C | -5.04294100 | -3.65509700 | -1.35965900 |
| H | -3.34854400 | -2.30386400 | -1.30554400 |
| C | -6.94419300 | -2.99648900 | -0.03126200 |

|   |             |             |             |
|---|-------------|-------------|-------------|
| H | -6.73489400 | -1.14103300 | 1.04586600  |
| C | -6.33508500 | -3.90216100 | -0.89483400 |
| H | -4.56372600 | -4.36104200 | -2.03137300 |
| H | -7.94869300 | -3.18347200 | 0.33527600  |
| H | -6.86340700 | -4.79852400 | -1.20409000 |
| C | 4.11814500  | 4.47599900  | 0.30517400  |
| H | 4.65232500  | 4.37332900  | -0.64179600 |
| H | 4.18454200  | 5.52307600  | 0.61715500  |
| H | 4.63395900  | 3.87642400  | 1.06021600  |
| C | -0.25253300 | 3.10884400  | 2.42972500  |
| H | -0.99114200 | 3.90180000  | 2.58231700  |
| H | -0.79930300 | 2.16495600  | 2.34336300  |
| H | 0.38375900  | 3.05234100  | 3.31435000  |
| C | 0.17280300  | 3.29067900  | -2.60646000 |
| H | 0.16072100  | 2.21936600  | -2.83663700 |
| H | -0.85432200 | 3.66213100  | -2.66216300 |
| H | 0.76592600  | 3.79841400  | -3.36843200 |
| C | 1.23928300  | -0.84587900 | -1.13977600 |
| C | 0.34896100  | 0.26551100  | -0.68908000 |
| H | 0.72075700  | -1.44487900 | -1.89774400 |
| C | 2.54740900  | -0.31776100 | -1.70459300 |
| C | 3.03332400  | -0.78332100 | -2.92752700 |
| C | 3.32819700  | 0.58170900  | -0.96961600 |
| C | 4.27295400  | -0.36495400 | -3.40731900 |
| H | 2.43992500  | -1.49316600 | -3.49746700 |
| C | 4.56974400  | 0.99455700  | -1.44194800 |
| H | 2.97230200  | 0.95091500  | -0.00951800 |
| C | 5.04723600  | 0.52078500  | -2.66297300 |
| H | 4.63561100  | -0.73752400 | -4.36035200 |
| H | 5.16895300  | 1.68098700  | -0.85090600 |
| H | 6.01742300  | 0.83969700  | -3.03053400 |
| C | -0.99316200 | 0.27855500  | -0.97258300 |
| O | -1.70876900 | -0.61020400 | -1.51611500 |
| H | 0.81423900  | 1.09677800  | -0.18478500 |
| C | -0.63464700 | -1.94736000 | 1.27030100  |
| C | -1.76294700 | -2.75303700 | 1.20718700  |
| H | -2.67628000 | -2.57293200 | 1.75665000  |
| C | -1.46158500 | -3.83633300 | 0.36673800  |
| H | -2.11072700 | -4.65964400 | 0.10852500  |
| C | -0.17298400 | -3.64889600 | -0.09071200 |
| H | 0.41159200  | -4.22064300 | -0.79148700 |
| N | 0.35261300  | -2.52563200 | 0.48204300  |
| C | -0.57838700 | -0.72805200 | 2.05589000  |
| C | 1.56069000  | -1.83869700 | 0.03904300  |



|   |              |              |              |
|---|--------------|--------------|--------------|
| H | 1. 93523100  | -1. 24177000 | 0. 86402500  |
| C | 2. 67506900  | -2. 78212700 | -0. 42006700 |
| O | 2. 46441400  | -3. 64724500 | -1. 24868900 |
| C | 4. 06668100  | -2. 49876500 | 0. 04771500  |
| C | 4. 35169200  | -1. 92945900 | 1. 29256100  |
| C | 5. 11070500  | -2. 81197800 | -0. 82844300 |
| C | 5. 67187900  | -1. 68151300 | 1. 65524300  |
| H | 3. 55533300  | -1. 69368400 | 1. 99074000  |
| C | 6. 42546900  | -2. 54191200 | -0. 47218400 |
| H | 4. 86600100  | -3. 24568400 | -1. 79237800 |
| C | 6. 70687800  | -1. 97771300 | 0. 77149400  |
| H | 5. 89173500  | -1. 25291500 | 2. 62733400  |
| H | 7. 23160500  | -2. 76815800 | -1. 16222600 |
| H | 7. 73439300  | -1. 76893900 | 1. 05197600  |
| C | 0. 71703600  | -0. 30987300 | 2. 80513400  |
| O | -1. 56984600 | -0. 06930400 | 2. 32057900  |
| F | 0. 39625400  | 0. 26700800  | 3. 95849800  |
| F | 1. 47417000  | 0. 56531700  | 2. 12096500  |
| F | 1. 48808900  | -1. 37648400 | 3. 07822100  |

**TS5RR**

|   |              |             |              |
|---|--------------|-------------|--------------|
| C | 3. 54795300  | 0. 76185400 | -0. 32305700 |
| C | 4. 71941000  | 1. 49593200 | 0. 32575700  |
| H | 3. 07794100  | 0. 05641100 | 0. 37433100  |
| H | 4. 45263700  | 1. 84266400 | 1. 33361400  |
| N | 2. 53453100  | 1. 81428700 | -0. 57534900 |
| O | 5. 10389800  | 2. 59234200 | -0. 49624100 |
| C | 2. 78579100  | 3. 15577700 | -0. 58032300 |
| C | 4. 19226700  | 3. 66173100 | -0. 42824900 |
| H | 4. 43415200  | 4. 36217900 | -1. 22980000 |
| H | 4. 26498200  | 4. 18934300 | 0. 53334500  |
| N | 1. 67705200  | 3. 84560200 | -0. 62848100 |
| C | 1. 20369500  | 1. 67299500 | -0. 58250200 |
| N | 0. 69648000  | 2. 90004000 | -0. 62584100 |
| C | -0. 70150300 | 3. 24402100 | -0. 58266100 |
| C | -1. 54789400 | 2. 77694500 | -1. 59044300 |
| C | -1. 15875300 | 3. 94132000 | 0. 54507800  |
| C | -2. 91439800 | 3. 02233900 | -1. 43821000 |
| C | -2. 52885500 | 4. 15831800 | 0. 63959700  |
| C | -3. 42164800 | 3. 70202000 | -0. 33529200 |
| H | -3. 59742800 | 2. 65205100 | -2. 19812200 |
| H | -2. 91376500 | 4. 68371800 | 1. 51014100  |
| H | 5. 57750000  | 0. 82458300 | 0. 38922600  |
| C | 3. 95818200  | 0. 05981600 | -1. 62170700 |

|   |             |             |             |
|---|-------------|-------------|-------------|
| H | 3.05642800  | -0.13315900 | -2.20619100 |
| H | 4.61302000  | 0.72513800  | -2.19410100 |
| C | 4.65297900  | -1.24376400 | -1.30441800 |
| C | 3.95443500  | -2.25103800 | -0.62613100 |
| C | 5.98426900  | -1.45688500 | -1.66153300 |
| C | 4.58643900  | -3.45282400 | -0.32333000 |
| H | 2.92062900  | -2.08208600 | -0.32386300 |
| C | 6.61432900  | -2.66314900 | -1.35979800 |
| H | 6.52944400  | -0.67366200 | -2.18268100 |
| C | 5.91505800  | -3.66321500 | -0.69123900 |
| H | 4.03976800  | -4.22740200 | 0.20502600  |
| H | 7.65006300  | -2.81865500 | -1.64529400 |
| H | 6.40381600  | -4.60280600 | -0.45360900 |
| C | -4.89681900 | 3.96808900  | -0.19679000 |
| H | -5.23617200 | 3.74945200  | 0.81927300  |
| H | -5.11913200 | 5.01971600  | -0.40465900 |
| H | -5.47377200 | 3.34930000  | -0.88650300 |
| C | -1.05867000 | 2.00423600  | -2.78822400 |
| H | -0.01724700 | 2.22505900  | -3.03356300 |
| H | -1.14338300 | 0.92457300  | -2.61813300 |
| H | -1.67058500 | 2.24530400  | -3.65951300 |
| C | -0.22228300 | 4.41701500  | 1.62497700  |
| H | 0.50328100  | 3.64604800  | 1.89484000  |
| H | 0.33614900  | 5.29813500  | 1.29746400  |
| H | -0.78885700 | 4.67759600  | 2.52007800  |
| C | -1.59897600 | -0.85852900 | -0.16054800 |
| C | -0.58495700 | 0.15894500  | 0.38102600  |
| H | -1.39870500 | -0.98397700 | -1.23009000 |
| C | -3.02156600 | -0.36788800 | -0.01218200 |
| C | -3.88135200 | -0.41088200 | -1.11185200 |
| C | -3.49124400 | 0.16176300  | 1.19518900  |
| C | -5.18292600 | 0.07760400  | -1.01940300 |
| H | -3.52311700 | -0.82620100 | -2.05203400 |
| C | -4.79155700 | 0.64716900  | 1.28879100  |
| H | -2.83343400 | 0.19932400  | 2.06195500  |
| C | -5.63942600 | 0.61028300  | 0.18278000  |
| H | -5.83702600 | 0.04193300  | -1.88522700 |
| H | -5.14567200 | 1.05474900  | 2.23086000  |
| H | -6.65179500 | 0.99533200  | 0.25995500  |
| C | 0.48927800  | 0.34968200  | -0.54761700 |
| O | 0.97346700  | -0.53387400 | -1.24864300 |
| H | -1.03991300 | 1.07258700  | 0.75690900  |
| C | -0.75299000 | -1.28382300 | 2.57053700  |
| C | -1.20827900 | -1.19722400 | 3.87004100  |

|   |             |             |             |
|---|-------------|-------------|-------------|
| H | -0.77579900 | -0.59148800 | 4.65216800  |
| C | -2.32688800 | -2.06357600 | 3.97632400  |
| H | -2.91555100 | -2.25661600 | 4.86134200  |
| C | -2.53042800 | -2.64080600 | 2.74438400  |
| H | -3.27572100 | -3.33469400 | 2.40018300  |
| N | -1.55427600 | -2.17521500 | 1.89695300  |
| C | 0.37678700  | -0.60298600 | 1.83594400  |
| O | 1.36539100  | -1.28542000 | 1.40636800  |
| C | 0.77985800  | 0.65732800  | 2.63579700  |
| F | 1.70588000  | 1.40168900  | 1.97932500  |
| F | 1.34126600  | 0.31528600  | 3.80162300  |
| F | -0.23756000 | 1.49239300  | 2.91578900  |
| C | -1.37589000 | -2.27440100 | 0.46251400  |
| H | -0.32271800 | -2.52251000 | 0.29649000  |
| C | -2.24978500 | -3.28502100 | -0.25547200 |
| O | -3.27316300 | -3.72941900 | 0.22486300  |
| C | -1.83363900 | -3.67860000 | -1.64431500 |
| C | -0.60699200 | -3.31588300 | -2.21329800 |
| C | -2.73634600 | -4.45104200 | -2.38397700 |
| C | -0.29446800 | -3.72731300 | -3.50624200 |
| H | 0.10760800  | -2.70291500 | -1.67196900 |
| C | -2.42055500 | -4.85803500 | -3.67328200 |
| H | -3.68074900 | -4.72113800 | -1.92347000 |
| C | -1.19657100 | -4.49667400 | -4.23582700 |
| H | 0.65880200  | -3.44481200 | -3.94076900 |
| H | -3.12527200 | -5.45670300 | -4.24117500 |
| H | -0.94700600 | -4.81498300 | -5.24320500 |

#### TS5RS

|   |             |             |             |
|---|-------------|-------------|-------------|
| C | 3.89708000  | 0.01296200  | -0.03868100 |
| C | 4.97845600  | 0.19255500  | 1.02127500  |
| H | 3.16996900  | -0.73779700 | 0.28017800  |
| H | 4.51946400  | 0.27556200  | 2.01572200  |
| N | 3.16369600  | 1.29512100  | -0.05644000 |
| O | 5.75081200  | 1.34964800  | 0.71941400  |
| C | 3.65428700  | 2.46703200  | 0.43886600  |
| C | 5.05246500  | 2.54191700  | 0.98529900  |
| H | 5.60022300  | 3.36364300  | 0.52017000  |
| H | 4.98324200  | 2.73157500  | 2.06582700  |
| N | 2.73607400  | 3.39557700  | 0.45767500  |
| C | 1.86392800  | 1.49510800  | -0.31108700 |
| N | 1.62482500  | 2.76827600  | -0.01679600 |
| C | 0.36112400  | 3.45139900  | -0.08795600 |
| C | -0.20243200 | 3.70036900  | -1.34091800 |

|   |             |             |             |
|---|-------------|-------------|-------------|
| C | -0.27400400 | 3.74700500  | 1.12180600  |
| C | -1.46202000 | 4.29551500  | -1.35965300 |
| C | -1.53249300 | 4.34102300  | 1.04331600  |
| C | -2.13641100 | 4.62463500  | -0.18326000 |
| H | -1.93434500 | 4.49095400  | -2.31890700 |
| H | -2.05945000 | 4.57254500  | 1.96556000  |
| H | 5.65819300  | -0.66105600 | 1.00009800  |
| C | 4.47238000  | -0.32071900 | -1.41899000 |
| H | 3.69289700  | -0.14444000 | -2.16349100 |
| H | 5.31821800  | 0.34378700  | -1.62358300 |
| C | 4.89686700  | -1.76935100 | -1.45136400 |
| C | 3.91745100  | -2.76882400 | -1.42729100 |
| C | 6.24308100  | -2.13592600 | -1.45991700 |
| C | 4.28388800  | -4.11035500 | -1.41725400 |
| H | 2.86625300  | -2.48650200 | -1.41051200 |
| C | 6.61028000  | -3.48076300 | -1.45273900 |
| H | 7.00747400  | -1.36235200 | -1.47469200 |
| C | 5.63135500  | -4.46961100 | -1.43145400 |
| H | 3.51362500  | -4.87528100 | -1.40064000 |
| H | 7.66090700  | -3.75375600 | -1.46285400 |
| H | 5.91623600  | -5.51700900 | -1.42562600 |
| C | -3.48951900 | 5.28307600  | -0.24045600 |
| H | -3.38567800 | 6.37168800  | -0.29478500 |
| H | -4.04625800 | 4.95726100  | -1.12236000 |
| H | -4.07988200 | 5.05088000  | 0.64926500  |
| C | 0.49565200  | 3.30793900  | -2.61664200 |
| H | 1.56055500  | 3.55468400  | -2.58479800 |
| H | 0.40635300  | 2.23116000  | -2.80030100 |
| H | 0.04826200  | 3.82523400  | -3.46657100 |
| C | 0.35548100  | 3.39093200  | 2.44189600  |
| H | 0.82106200  | 2.39868400  | 2.41157300  |
| H | 1.13450800  | 4.11343500  | 2.70460800  |
| H | -0.39782600 | 3.39227000  | 3.23153100  |
| C | -1.36818200 | -0.55231400 | -0.72565900 |
| C | -0.32824100 | 0.34158800  | -0.07814600 |
| H | -0.89940700 | -1.03287900 | -1.59277300 |
| C | -2.60051700 | 0.19498800  | -1.20779000 |
| C | -3.17375300 | -0.16138500 | -2.43270600 |
| C | -3.21987200 | 1.19189700  | -0.44797700 |
| C | -4.34213000 | 0.44682600  | -2.88206100 |
| H | -2.70259400 | -0.93731400 | -3.03077100 |
| C | -4.39047900 | 1.80010300  | -0.89489600 |
| H | -2.79345900 | 1.50309400  | 0.50026100  |
| C | -4.95830600 | 1.42854600  | -2.11065300 |

|   |             |             |             |
|---|-------------|-------------|-------------|
| H | -4.77073500 | 0.15110900  | -3.83451600 |
| H | -4.86154700 | 2.56578500  | -0.28520500 |
| H | -5.87294200 | 1.90084600  | -2.45507600 |
| C | 0.91279100  | 0.41303700  | -0.77221600 |
| O | 1.37692500  | -0.39433300 | -1.57881400 |
| H | -0.68536100 | 1.28042300  | 0.32581100  |
| C | 0.50835800  | -1.85513000 | 1.17571500  |
| C | 1.55532900  | -2.74503700 | 1.27156700  |
| H | 2.50140200  | -2.53240500 | 1.74920400  |
| C | 1.12669000  | -3.95763500 | 0.67540300  |
| H | 1.68794500  | -4.87704700 | 0.59286200  |
| C | -0.15873400 | -3.76536200 | 0.22290200  |
| H | -0.82070200 | -4.43003400 | -0.30480700 |
| N | -0.54047800 | -2.48426000 | 0.53694700  |
| C | 0.47898400  | -0.43905500 | 1.63424400  |
| C | -1.75463400 | -1.75468800 | 0.19531000  |
| H | -2.18937100 | -1.38082100 | 1.11883000  |
| C | -2.78830200 | -2.61050900 | -0.53372100 |
| O | -2.44512100 | -3.30812700 | -1.46922300 |
| C | -4.22947700 | -2.51073500 | -0.14299900 |
| C | -4.71141900 | -1.63113000 | 0.83287900  |
| C | -5.12981000 | -3.33438100 | -0.82970200 |
| C | -6.07422000 | -1.57909700 | 1.11069900  |
| H | -4.04602600 | -0.96660000 | 1.37317900  |
| C | -6.48645100 | -3.28762700 | -0.54329200 |
| H | -4.73847900 | -4.00537700 | -1.58660300 |
| C | -6.96085200 | -2.40660400 | 0.42867500  |
| H | -6.44223300 | -0.88990400 | 1.86327400  |
| H | -7.17597800 | -3.93337200 | -1.07703800 |
| H | -8.02213500 | -2.36552900 | 0.65271000  |
| O | 1.57105000  | 0.12324100  | 1.92714100  |
| C | -0.66440300 | -0.13105400 | 2.68555900  |
| F | -1.71070700 | 0.60218000  | 2.23829600  |
| F | -1.19842400 | -1.26521600 | 3.17460900  |
| F | -0.16013000 | 0.54145500  | 3.71834900  |

**TS5SR**

|   |             |             |             |
|---|-------------|-------------|-------------|
| C | -3.97387400 | -0.23953400 | -0.80701200 |
| C | -5.42621700 | 0.10420700  | -1.13007700 |
| H | -3.46408700 | -0.63364500 | -1.68573500 |
| H | -5.50190000 | 0.63319400  | -2.09095500 |
| N | -3.30778200 | 1.04386200  | -0.47576200 |
| O | -5.99403500 | 0.88901300  | -0.09338700 |
| C | -3.98844300 | 2.17868900  | -0.14135200 |

|   |             |             |             |
|---|-------------|-------------|-------------|
| C | -5.48937700 | 2.20187000  | -0.10928200 |
| H | -5.83014500 | 2.70878600  | 0.79484200  |
| H | -5.85606500 | 2.75730900  | -0.98494200 |
| N | -3.17335700 | 3.17156400  | 0.08156300  |
| C | -1.99466900 | 1.34014800  | -0.41463500 |
| N | -1.93783400 | 2.63466400  | -0.09979700 |
| C | -0.77231700 | 3.47430300  | 0.00970500  |
| C | -0.41238500 | 3.91353800  | 1.28500900  |
| C | -0.03366200 | 3.74991100  | -1.14496800 |
| C | 0.76066100  | 4.65982400  | 1.38419200  |
| C | 1.13450300  | 4.49027500  | -0.98500000 |
| C | 1.54506500  | 4.95058100  | 0.26706000  |
| H | 1.08014200  | 5.00146900  | 2.36555300  |
| H | 1.75105600  | 4.69077500  | -1.85770600 |
| H | -6.00148500 | -0.82195900 | -1.18900700 |
| C | -3.83995700 | -1.21897700 | 0.36357800  |
| H | -2.82092000 | -1.14826700 | 0.75551200  |
| H | -4.52423800 | -0.90418600 | 1.15934900  |
| C | -4.13572100 | -2.62665700 | -0.08935500 |
| C | -3.19678000 | -3.29830100 | -0.88078200 |
| C | -5.32732500 | -3.27194700 | 0.24536900  |
| C | -3.44614300 | -4.59439400 | -1.31904700 |
| H | -2.26394500 | -2.79615600 | -1.12997900 |
| C | -5.57879800 | -4.57026500 | -0.19607100 |
| H | -6.05870700 | -2.75622400 | 0.86355500  |
| C | -4.63791800 | -5.23371500 | -0.97795000 |
| H | -2.70540000 | -5.10935600 | -1.92322500 |
| H | -6.50738100 | -5.06306500 | 0.07478600  |
| H | -4.83016300 | -6.24629500 | -1.31868000 |
| C | 2.80724000  | 5.76045400  | 0.40471900  |
| H | 3.49702600  | 5.54811200  | -0.41535800 |
| H | 2.58212200  | 6.83189700  | 0.38925200  |
| H | 3.31369500  | 5.54324500  | 1.34869000  |
| C | -1.22919800 | 3.54379900  | 2.49392000  |
| H | -2.19958900 | 4.04824400  | 2.47764000  |
| H | -1.40662300 | 2.46242500  | 2.52223500  |
| H | -0.70215100 | 3.83076900  | 3.40517400  |
| C | -0.42999200 | 3.21789300  | -2.49632900 |
| H | -0.13644100 | 2.16625400  | -2.59979800 |
| H | -1.50932300 | 3.28731300  | -2.66139300 |
| H | 0.07496900  | 3.77892200  | -3.28439100 |
| C | 1.54617800  | -0.06705400 | -0.91757000 |
| C | 0.39694900  | 0.60021700  | -0.18673000 |
| H | 1.15332700  | -0.50466300 | -1.84151700 |

|   |              |              |              |
|---|--------------|--------------|--------------|
| C | 2. 59294800  | 0. 97515400  | -1. 26392300 |
| C | 2. 86031700  | 1. 30280900  | -2. 59423000 |
| C | 3. 26255900  | 1. 67241400  | -0. 25204200 |
| C | 3. 76651100  | 2. 31262500  | -2. 91045500 |
| H | 2. 35604500  | 0. 75317400  | -3. 38433800 |
| C | 4. 17831000  | 2. 67207200  | -0. 56507000 |
| H | 3. 04454200  | 1. 45142000  | 0. 79068000  |
| C | 4. 43058800  | 2. 99920500  | -1. 89631700 |
| H | 3. 96141500  | 2. 55561600  | -3. 95059600 |
| H | 4. 69000200  | 3. 20264000  | 0. 23259900  |
| H | 5. 14342400  | 3. 78110900  | -2. 14081100 |
| C | -0. 87476300 | 0. 37896400  | -0. 75791700 |
| O | -1. 21592300 | -0. 57831500 | -1. 46717300 |
| H | 0. 59669900  | 1. 57959100  | 0. 22498900  |
| C | 0. 09046800  | -1. 68974200 | 1. 22054400  |
| C | -0. 75173200 | -2. 76532000 | 1. 41583400  |
| H | -1. 65399500 | -2. 73338200 | 2. 00968900  |
| C | -0. 20258900 | -3. 87077200 | 0. 72639800  |
| H | -0. 60651800 | -4. 87089600 | 0. 67106800  |
| C | 0. 95028500  | -3. 43402500 | 0. 11753600  |
| H | 1. 64996300  | -3. 96932600 | -0. 50670700 |
| N | 1. 14611100  | -2. 11080600 | 0. 42782700  |
| C | -0. 16737600 | -0. 30461700 | 1. 68570900  |
| C | 2. 17364600  | -1. 23745600 | -0. 13527100 |
| H | 2. 77722300  | -0. 83160600 | 0. 67665800  |
| C | 3. 13207500  | -2. 04672300 | -1. 02333100 |
| O | 3. 07732700  | -1. 95863500 | -2. 23210100 |
| C | 4. 15406400  | -2. 90806100 | -0. 35182800 |
| C | 4. 18596300  | -3. 08568900 | 1. 03567300  |
| C | 5. 09605700  | -3. 55458800 | -1. 15785800 |
| C | 5. 15750500  | -3. 90155000 | 1. 60670600  |
| H | 3. 45041400  | -2. 60142800 | 1. 67198700  |
| C | 6. 06762100  | -4. 36367200 | -0. 58417000 |
| H | 5. 04830300  | -3. 40309700 | -2. 23109100 |
| C | 6. 09791800  | -4. 53729200 | 0. 79940300  |
| H | 5. 17922400  | -4. 04183100 | 2. 68209700  |
| H | 6. 80085300  | -4. 86011000 | -1. 21121700 |
| H | 6. 85565900  | -5. 17135200 | 1. 24890400  |
| C | 0. 89505700  | 0. 33014800  | 2. 62241400  |
| O | -1. 32816600 | 0. 05315000  | 1. 98886700  |
| F | 0. 50225200  | 0. 14134900  | 3. 88671200  |
| F | 1. 03555200  | 1. 65395600  | 2. 45222600  |
| F | 2. 13132500  | -0. 20261800 | 2. 52743400  |

**TS5SS**

|   |              |              |              |
|---|--------------|--------------|--------------|
| C | 3. 58724900  | -0. 87448900 | -0. 98514200 |
| C | 4. 76147500  | -1. 54009300 | -1. 69937200 |
| H | 3. 31454800  | 0. 05620400  | -1. 48230500 |
| H | 4. 62582800  | -1. 50443600 | -2. 78978500 |
| N | 2. 43478900  | -1. 79708900 | -1. 15439400 |
| O | 4. 91003700  | -2. 88451800 | -1. 27100500 |
| C | 2. 55298700  | -3. 11136600 | -1. 50838600 |
| C | 3. 89981000  | -3. 70589300 | -1. 80370700 |
| H | 3. 97828000  | -4. 68967100 | -1. 33876000 |
| H | 4. 01232400  | -3. 81858900 | -2. 89181800 |
| N | 1. 38671600  | -3. 69284600 | -1. 56548500 |
| C | 1. 12736200  | -1. 56796600 | -0. 94198500 |
| N | 0. 50715900  | -2. 71618700 | -1. 21492500 |
| C | -0. 90677700 | -2. 98709600 | -1. 15394700 |
| C | -1. 35196700 | -3. 90399500 | -0. 19400100 |
| C | -1. 76520700 | -2. 28157300 | -2. 00163600 |
| C | -2. 72835600 | -4. 07604800 | -0. 08028100 |
| C | -3. 13456000 | -2. 48032100 | -1. 82822100 |
| C | -3. 63179500 | -3. 36618100 | -0. 87460300 |
| H | -3. 10629600 | -4. 77374500 | 0. 66292200  |
| H | -3. 82661100 | -1. 90885200 | -2. 44185400 |
| H | 5. 67900200  | -1. 00917800 | -1. 44052100 |
| C | 3. 84049000  | -0. 61266700 | 0. 50665400  |
| H | 2. 88710900  | -0. 40716500 | 1. 00358100  |
| H | 4. 28568000  | -1. 51182100 | 0. 94716800  |
| C | 4. 72692200  | 0. 59494200  | 0. 68111000  |
| C | 4. 13064300  | 1. 86037800  | 0. 70626200  |
| C | 6. 11419300  | 0. 49020100  | 0. 79370800  |
| C | 4. 91731100  | 3. 00131600  | 0. 82793900  |
| H | 3. 04464900  | 1. 92222600  | 0. 65961300  |
| C | 6. 90144100  | 1. 63380700  | 0. 91628300  |
| H | 6. 57928400  | -0. 49350900 | 0. 80346200  |
| C | 6. 30383400  | 2. 89090500  | 0. 92817600  |
| H | 4. 44766800  | 3. 97976700  | 0. 85702900  |
| H | 7. 97907600  | 1. 54123400  | 1. 00941500  |
| H | 6. 91511700  | 3. 78258200  | 1. 02641700  |
| C | -5. 11324700 | -3. 56938300 | -0. 70112600 |
| H | -5. 40788800 | -3. 39324000 | 0. 33743700  |
| H | -5. 68222500 | -2. 88836100 | -1. 33673600 |
| H | -5. 39476600 | -4. 59646400 | -0. 95326700 |
| C | -0. 39808200 | -4. 67351900 | 0. 68058500  |
| H | 0. 08483200  | -5. 47451200 | 0. 11404500  |
| H | 0. 38577800  | -4. 02870800 | 1. 08289500  |



|   |             |             |             |
|---|-------------|-------------|-------------|
| H | -0.93675600 | -5.11692100 | 1.51932600  |
| C | -1.26425700 | -1.31212300 | -3.04004000 |
| H | -1.08798400 | -0.32014400 | -2.60845700 |
| H | -0.33205500 | -1.65239500 | -3.49937300 |
| H | -2.01083300 | -1.19338400 | -3.82715600 |
| C | -1.46291100 | 1.11268000  | -0.17506900 |
| C | -0.64888500 | -0.13185900 | 0.20905200  |
| H | -1.05335500 | 1.49492700  | -1.11634900 |
| C | -2.92136800 | 0.78045500  | -0.40800700 |
| C | -3.53700500 | 1.18361700  | -1.59538800 |
| C | -3.67046900 | 0.06261800  | 0.53156900  |
| C | -4.87142600 | 0.87307100  | -1.85040700 |
| H | -2.96301700 | 1.74818300  | -2.32763400 |
| C | -5.00521800 | -0.23984400 | 0.28145500  |
| H | -3.20487900 | -0.26751100 | 1.45873100  |
| C | -5.60883900 | 0.15827400  | -0.91073800 |
| H | -5.33259300 | 1.19308800  | -2.77974900 |
| H | -5.57709100 | -0.79033500 | 1.02235400  |
| H | -6.65018500 | -0.08258900 | -1.10233200 |
| C | 0.54972000  | -0.22434200 | -0.56866500 |
| O | 1.22574700  | 0.74580500  | -0.90941400 |
| H | -1.24471100 | -1.03649800 | 0.27951800  |
| C | -1.12337900 | 0.68525400  | 2.65798100  |
| C | -1.81763800 | 0.29296600  | 3.78279500  |
| H | -1.57412400 | -0.54964500 | 4.41280200  |
| C | -2.87945000 | 1.21914800  | 3.95623300  |
| H | -3.61040900 | 1.22541200  | 4.75170000  |
| C | -2.81150900 | 2.13434400  | 2.93086000  |
| H | -3.43412400 | 2.97681300  | 2.68919200  |
| N | -1.72493900 | 1.81302900  | 2.15332100  |
| C | 0.09011500  | 0.13034700  | 1.95835200  |
| O | 1.15334700  | 0.82332300  | 1.88821800  |
| C | 0.30638700  | -1.33270400 | 2.40158300  |
| F | 1.28894900  | -1.93119200 | 1.68457700  |
| F | -0.77889800 | -2.12045000 | 2.28106700  |
| F | 0.68742800  | -1.38530800 | 3.68311800  |
| C | -1.27183800 | 2.27392900  | 0.85598000  |
| H | -0.19265400 | 2.43123100  | 0.94482600  |
| C | -1.91825100 | 3.53815100  | 0.32578600  |
| O | -2.97808200 | 3.96220300  | 0.74148200  |
| C | -1.21071100 | 4.23627000  | -0.80106000 |
| C | 0.06912800  | 3.87798000  | -1.24175500 |
| C | -1.88148000 | 5.29769600  | -1.41971300 |
| C | 0.66397000  | 4.57851700  | -2.28722700 |

|   |             |            |             |
|---|-------------|------------|-------------|
| H | 0.60786100  | 3.04761500 | -0.79471000 |
| C | -1.28430000 | 5.99275800 | -2.46294600 |
| H | -2.87172700 | 5.56060000 | -1.06292400 |
| C | -0.00837600 | 5.63403600 | -2.89732300 |
| H | 1.65655100  | 4.29652400 | -2.62269200 |
| H | -1.80988400 | 6.81427000 | -2.93871800 |
| H | 0.46081600  | 6.17739400 | -3.71160500 |

**M5RR**

|   |             |             |             |
|---|-------------|-------------|-------------|
| C | 3.80104300  | 0.83546900  | 0.05522300  |
| C | 5.00855100  | 1.71575500  | 0.37362200  |
| H | 3.48347700  | 0.28888500  | 0.94465300  |
| H | 4.87480000  | 2.21900400  | 1.34184100  |
| N | 2.70026300  | 1.75411200  | -0.30108600 |
| O | 5.21237200  | 2.67479500  | -0.65239600 |
| C | 2.86795900  | 3.07502800  | -0.63574600 |
| C | 4.23700200  | 3.69014400  | -0.60870500 |
| H | 4.37355300  | 4.33126100  | -1.48080400 |
| H | 4.34402400  | 4.30077200  | 0.29966800  |
| N | 1.73085000  | 3.63638700  | -0.93069700 |
| C | 1.39196700  | 1.48242600  | -0.41596900 |
| N | 0.82267900  | 2.62571100  | -0.78980000 |
| C | -0.58891700 | 2.80765700  | -1.00840700 |
| C | -1.12026800 | 2.46784500  | -2.25462900 |
| C | -1.36629000 | 3.24873600  | 0.06716900  |
| C | -2.50994900 | 2.50032700  | -2.37751500 |
| C | -2.74788100 | 3.25895300  | -0.10762800 |
| C | -3.33454700 | 2.87089100  | -1.31451100 |
| H | -2.95688800 | 2.21586400  | -3.32718600 |
| H | -3.38153300 | 3.55878700  | 0.72317600  |
| H | 5.90317800  | 1.09191200  | 0.41830800  |
| C | 4.04763500  | -0.14459000 | -1.09928000 |
| H | 3.08044400  | -0.54205600 | -1.42787800 |
| H | 4.49112000  | 0.40920900  | -1.93415400 |
| C | 4.95511100  | -1.26515300 | -0.65205400 |
| C | 4.46985100  | -2.23589200 | 0.23198100  |
| C | 6.28370600  | -1.33460600 | -1.07391000 |
| C | 5.30186500  | -3.25742100 | 0.67814100  |
| H | 3.43325000  | -2.18170500 | 0.55838800  |
| C | 7.11695500  | -2.35903800 | -0.62762800 |
| H | 6.66568200  | -0.58409000 | -1.76196400 |
| C | 6.62703400  | -3.32216000 | 0.24930900  |
| H | 4.91356700  | -4.00795400 | 1.35943700  |
| H | 8.14679900  | -2.40426800 | -0.96771400 |

|   |             |             |             |
|---|-------------|-------------|-------------|
| H | 7.27371500  | -4.12179200 | 0.59626600  |
| C | -4.83240400 | 2.88165900  | -1.47214500 |
| H | -5.32359900 | 2.67966800  | -0.51707300 |
| H | -5.17801400 | 3.85734000  | -1.82875500 |
| H | -5.15655100 | 2.12873300  | -2.19558600 |
| C | -0.23145300 | 2.09448400  | -3.40773700 |
| H | 0.55216600  | 2.84567700  | -3.54794500 |
| H | 0.24498600  | 1.13091600  | -3.20415600 |
| H | -0.81275100 | 2.03157600  | -4.32961600 |
| C | -0.73318300 | 3.70725800  | 1.35523200  |
| H | 0.02219300  | 3.00604300  | 1.72346900  |
| H | -0.23292600 | 4.66986800  | 1.20951500  |
| H | -1.49084400 | 3.82794100  | 2.13097100  |
| C | -1.77341200 | -0.50011300 | 0.21244800  |
| C | -0.47908400 | 0.10277900  | 0.73329800  |
| H | -1.96045400 | 0.00380300  | -0.74205300 |
| C | -2.97695500 | -0.27974200 | 1.10448400  |
| C | -4.19776800 | 0.07091400  | 0.51919400  |
| C | -2.91647000 | -0.43111300 | 2.49202500  |
| C | -5.33350500 | 0.26775800  | 1.29856600  |
| H | -4.25029700 | 0.19242700  | -0.56121300 |
| C | -4.05196200 | -0.23117100 | 3.27407500  |
| H | -1.97873400 | -0.70086600 | 2.96951900  |
| C | -5.26221200 | 0.11820400  | 2.68175300  |
| H | -6.27330800 | 0.53622600  | 0.82483900  |
| H | -3.98857000 | -0.35171800 | 4.35097600  |
| H | -6.14542700 | 0.27238900  | 3.29364200  |
| C | 0.65165400  | 0.12582100  | -0.37218300 |
| O | 0.44122800  | -0.27260300 | -1.56994300 |
| H | -0.68480400 | 1.05373700  | 1.22654500  |
| C | -0.07352100 | -2.15957900 | 1.86070300  |
| C | 0.23976200  | -3.06464600 | 2.85190700  |
| H | 0.98126100  | -2.92135600 | 3.62364000  |
| C | -0.59770600 | -4.19008600 | 2.66486600  |
| H | -0.62656300 | -5.08551900 | 3.26781200  |
| C | -1.39251800 | -3.94010700 | 1.56935100  |
| H | -2.16225100 | -4.53557400 | 1.11226400  |
| N | -1.08329400 | -2.69632100 | 1.08490700  |
| C | 0.46695200  | -0.81600600 | 1.52700600  |
| O | 1.46113600  | -0.79942200 | 0.49089900  |
| C | 1.08355100  | -0.13605100 | 2.73753200  |
| F | 1.52549500  | 1.10242500  | 2.40991200  |
| F | 2.15226700  | -0.80469300 | 3.19162100  |
| F | 0.22364600  | 0.01123000  | 3.75021600  |

|   |             |             |             |
|---|-------------|-------------|-------------|
| C | -1.54979600 | -2.00883600 | -0.11612100 |
| H | -0.75366900 | -2.04774400 | -0.86752800 |
| C | -2.83033100 | -2.56425300 | -0.72287900 |
| O | -3.56270900 | -3.32571500 | -0.12528200 |
| C | -3.20307500 | -2.06457500 | -2.09072000 |
| C | -2.35079000 | -1.29627400 | -2.89554500 |
| C | -4.48685400 | -2.38491700 | -2.54610800 |
| C | -2.79420200 | -0.86108100 | -4.14293700 |
| H | -1.35084600 | -1.02015300 | -2.56179600 |
| C | -4.92229400 | -1.94428900 | -3.78872400 |
| H | -5.12804000 | -2.97910100 | -1.90383600 |
| C | -4.07403300 | -1.17948400 | -4.58969900 |
| H | -2.13071900 | -0.27149500 | -4.76829000 |
| H | -5.91986600 | -2.19487100 | -4.13452900 |
| H | -4.41156200 | -0.83423500 | -5.56208600 |

**M5RS**

|   |             |             |             |
|---|-------------|-------------|-------------|
| C | 4.08364300  | 0.07157800  | 0.11125600  |
| C | 5.41502200  | 0.57295400  | 0.66472600  |
| H | 3.67540600  | -0.70809100 | 0.75546300  |
| H | 5.35597800  | 0.70812900  | 1.75435000  |
| N | 3.14578700  | 1.21399400  | 0.17544200  |
| O | 5.79186300  | 1.79197400  | 0.04337800  |
| C | 3.54206500  | 2.51546600  | 0.33683800  |
| C | 4.99475400  | 2.85926700  | 0.49871400  |
| H | 5.23391800  | 3.74186200  | -0.09614800 |
| H | 5.19916500  | 3.08041700  | 1.55640600  |
| N | 2.52352400  | 3.32250800  | 0.34595300  |
| C | 1.80395700  | 1.21928700  | 0.05944400  |
| N | 1.44473400  | 2.49469300  | 0.17372500  |
| C | 0.12881400  | 3.08078800  | 0.12632600  |
| C | -0.40176000 | 3.41602800  | -1.12330400 |
| C | -0.50137800 | 3.38514000  | 1.33604200  |
| C | -1.63063700 | 4.07156500  | -1.13261900 |
| C | -1.72926700 | 4.04119300  | 1.26733000  |
| C | -2.30134700 | 4.39627100  | 0.04644800  |
| H | -2.07628700 | 4.33229200  | -2.08921000 |
| H | -2.24367000 | 4.28909500  | 2.19265800  |
| H | 6.19137400  | -0.16151500 | 0.44137700  |
| C | 4.18026000  | -0.44018500 | -1.33314300 |
| H | 3.16537700  | -0.51089400 | -1.74028500 |
| H | 4.73586700  | 0.29821000  | -1.92222400 |
| C | 4.85823600  | -1.78763700 | -1.37255800 |
| C | 4.14070100  | -2.92895300 | -0.99622200 |

|   |             |             |             |
|---|-------------|-------------|-------------|
| C | 6.19718200  | -1.92040800 | -1.74479600 |
| C | 4.75503700  | -4.17680300 | -0.99673400 |
| H | 3.09734600  | -2.82166400 | -0.70643500 |
| C | 6.81308600  | -3.17065700 | -1.74446300 |
| H | 6.75825700  | -1.03794600 | -2.04446100 |
| C | 6.09287800  | -4.30117400 | -1.37004000 |
| H | 4.18646500  | -5.05604800 | -0.70991600 |
| H | 7.85354800  | -3.26029300 | -2.04093200 |
| H | 6.56993900  | -5.27619900 | -1.37263400 |
| C | -3.60872400 | 5.14194600  | -0.00261200 |
| H | -3.43552200 | 6.22189300  | -0.05324700 |
| H | -4.18706900 | 4.85470500  | -0.88444700 |
| H | -4.21177600 | 4.94300800  | 0.88679500  |
| C | 0.33666600  | 3.09725000  | -2.39346200 |
| H | 1.30129800  | 3.61639200  | -2.41618800 |
| H | 0.52777800  | 2.02054900  | -2.46126300 |
| H | -0.24569600 | 3.41657400  | -3.25960700 |
| C | 0.10795900  | 3.02112800  | 2.66460900  |
| H | -0.04138400 | 1.96266800  | 2.89948400  |
| H | 1.18506700  | 3.20654500  | 2.67580800  |
| H | -0.35080100 | 3.60823500  | 3.46202400  |
| C | -1.48400700 | -0.75789700 | -0.35869300 |
| C | -0.34631100 | -0.23453900 | 0.50801500  |
| H | -1.02737300 | -1.26667900 | -1.21476100 |
| C | -2.38881800 | 0.33325100  | -0.89185400 |
| C | -2.44403100 | 0.57423400  | -2.26632800 |
| C | -3.26292000 | 1.02470600  | -0.04894100 |
| C | -3.39173500 | 1.44931100  | -2.79284500 |
| H | -1.73934200 | 0.06165900  | -2.91478700 |
| C | -4.22918200 | 1.87621400  | -0.57467100 |
| H | -3.22248400 | 0.86393400  | 1.02680400  |
| C | -4.30270700 | 2.08249700  | -1.95042600 |
| H | -3.43030100 | 1.62014900  | -3.86442300 |
| H | -4.92689000 | 2.37665300  | 0.09065500  |
| H | -5.06289400 | 2.73967900  | -2.36288800 |
| C | 0.92487700  | 0.03137600  | -0.39826700 |
| O | 0.86226300  | 0.01708000  | -1.66580000 |
| H | -0.67173700 | 0.57735500  | 1.16640700  |
| C | -0.11776200 | -2.70611200 | 1.20729100  |
| C | 0.40712300  | -3.92180000 | 1.58939900  |
| H | 1.40946500  | -4.08112200 | 1.95825000  |
| C | -0.60409900 | -4.89537400 | 1.39255000  |
| H | -0.52971600 | -5.95658800 | 1.57789300  |
| C | -1.71095100 | -4.24336200 | 0.90050100  |

|   |             |             |             |
|---|-------------|-------------|-------------|
| H | -2.67572000 | -4.62095300 | 0.59872200  |
| N | -1.40877800 | -2.91431700 | 0.78050900  |
| C | 0.48771300  | -1.34225600 | 1.17374000  |
| C | -2.30428100 | -1.84219700 | 0.38530400  |
| H | -2.77520200 | -1.40974500 | 1.27497100  |
| C | -3.36768800 | -2.33037100 | -0.60935500 |
| O | -3.04686800 | -3.04665100 | -1.53319300 |
| C | -4.75011000 | -1.78020000 | -0.48769000 |
| C | -5.34946800 | -1.50877900 | 0.74525400  |
| C | -5.43863300 | -1.50672700 | -1.67254200 |
| C | -6.62753500 | -0.96208000 | 0.78970000  |
| H | -4.83202700 | -1.73842900 | 1.67210100  |
| C | -6.70252900 | -0.93256800 | -1.62510700 |
| H | -4.95189500 | -1.71900200 | -2.61898000 |
| C | -7.29768700 | -0.66086900 | -0.39410000 |
| H | -7.09828500 | -0.76625700 | 1.74750500  |
| H | -7.22489700 | -0.69528700 | -2.54604000 |
| H | -8.28708500 | -0.21595500 | -0.35635700 |
| O | 1.56974500  | -1.19521000 | 0.26133100  |
| C | 0.96869700  | -0.94733800 | 2.56358300  |
| F | -0.05055500 | -0.85651600 | 3.42912000  |
| F | 1.86431600  | -1.80892000 | 3.05850700  |
| F | 1.57699600  | 0.26126000  | 2.54850300  |

### M5SR

|   |             |             |             |
|---|-------------|-------------|-------------|
| C | -4.13431000 | 0.39148600  | -0.44465900 |
| C | -5.35757600 | 1.04809700  | -1.08189800 |
| H | -3.60279300 | -0.24623400 | -1.15641800 |
| H | -5.09694500 | 1.51651400  | -2.04112900 |
| N | -3.22330800 | 1.50650600  | -0.12345800 |
| O | -5.89759100 | 2.01047300  | -0.18533600 |
| C | -3.64318200 | 2.79191900  | 0.08541600  |
| C | -5.09237000 | 3.16099600  | -0.07278600 |
| H | -5.43796100 | 3.72800500  | 0.79341400  |
| H | -5.18491500 | 3.79574300  | -0.96584500 |
| N | -2.63663400 | 3.58710400  | 0.29950500  |
| C | -1.88084200 | 1.50492900  | -0.04871200 |
| N | -1.54148500 | 2.76291300  | 0.21657300  |
| C | -0.22469500 | 3.34617300  | 0.26178100  |
| C | 0.39018700  | 3.56981900  | 1.49577200  |
| C | 0.33995200  | 3.73358100  | -0.95886000 |
| C | 1.64669400  | 4.17536900  | 1.47830200  |
| C | 1.58489100  | 4.35294200  | -0.91526000 |
| C | 2.25516800  | 4.57138500  | 0.28838000  |

|   |              |              |              |
|---|--------------|--------------|--------------|
| H | 2. 15398900  | 4. 35132000  | 2. 42420700  |
| H | 2. 05015100  | 4. 65731800  | -1. 84854600 |
| H | -6. 13224700 | 0. 29747000  | -1. 24686900 |
| C | -4. 51199400 | -0. 38619400 | 0. 82508200  |
| H | -3. 60170700 | -0. 58197500 | 1. 39139100  |
| H | -5. 17328700 | 0. 24310500  | 1. 42916600  |
| C | -5. 18592900 | -1. 68924100 | 0. 47165800  |
| C | -4. 41672400 | -2. 75828700 | -0. 00129900 |
| C | -6. 56887800 | -1. 84325400 | 0. 58123100  |
| C | -5. 02475900 | -3. 96005500 | -0. 35004600 |
| H | -3. 33970500 | -2. 63140000 | -0. 09325500 |
| C | -7. 17812500 | -3. 04693100 | 0. 23147500  |
| H | -7. 17021500 | -1. 01425700 | 0. 94789500  |
| C | -6. 40649100 | -4. 10753800 | -0. 23385400 |
| H | -4. 41849200 | -4. 78463300 | -0. 71193600 |
| H | -8. 25422200 | -3. 15545800 | 0. 32510900  |
| H | -6. 87900800 | -5. 04647900 | -0. 50461700 |
| C | 3. 59849500  | 5. 25161700  | 0. 30132200  |
| H | 4. 11132800  | 5. 11652700  | -0. 65397200 |
| H | 3. 48659200  | 6. 32679000  | 0. 47569900  |
| H | 4. 23526600  | 4. 85213200  | 1. 09490200  |
| C | -0. 24410600 | 3. 16809900  | 2. 80140000  |
| H | -1. 33355800 | 3. 14723700  | 2. 73612600  |
| H | 0. 08697800  | 2. 17229900  | 3. 11197000  |
| H | 0. 04130000  | 3. 87224900  | 3. 58567000  |
| C | -0. 38458600 | 3. 50650700  | -2. 25740100 |
| H | -0. 61591100 | 2. 44321600  | -2. 38942000 |
| H | -1. 32588100 | 4. 06728400  | -2. 27382700 |
| H | 0. 23121400  | 3. 84008200  | -3. 09475800 |
| C | 1. 42090000  | -0. 46411900 | -0. 58508800 |
| C | 0. 29233200  | 0. 05158400  | 0. 30519500  |
| H | 0. 96256600  | -0. 97896900 | -1. 43546200 |
| C | 2. 29429300  | 0. 64705500  | -1. 13645700 |
| C | 2. 09166200  | 1. 09249700  | -2. 44579700 |
| C | 3. 34337400  | 1. 19667600  | -0. 39427500 |
| C | 2. 94556100  | 2. 03315600  | -3. 01385600 |
| H | 1. 25618800  | 0. 68373500  | -3. 00713500 |
| C | 4. 20651300  | 2. 12936200  | -0. 96624100 |
| H | 3. 51087200  | 0. 88848700  | 0. 63498600  |
| C | 4. 01709600  | 2. 54184400  | -2. 28157800 |
| H | 2. 78269600  | 2. 35798200  | -4. 03742700 |
| H | 5. 02990200  | 2. 52974500  | -0. 38188100 |
| H | 4. 69641500  | 3. 26050000  | -2. 73093600 |
| C | -1. 01064600 | 0. 32525600  | -0. 54352000 |

|   |             |             |             |
|---|-------------|-------------|-------------|
| O | -1.02225900 | 0.32891100  | -1.81204800 |
| H | 0.63584600  | 0.85925200  | 0.96029500  |
| C | 0.08969300  | -2.42411000 | 0.99766500  |
| C | -0.42956400 | -3.65423300 | 1.34061700  |
| H | -1.43176300 | -3.82910200 | 1.70372500  |
| C | 0.58756200  | -4.61496700 | 1.11842100  |
| H | 0.52044800  | -5.68131200 | 1.27468000  |
| C | 1.69438400  | -3.94160100 | 0.65343400  |
| H | 2.66851400  | -4.30566800 | 0.36170900  |
| N | 1.38386300  | -2.60938600 | 0.57640000  |
| C | -0.51758100 | -1.06105300 | 0.99635500  |
| C | 2.25377000  | -1.51073600 | 0.16985000  |
| H | 2.69453700  | -1.06137500 | 1.06696600  |
| C | 3.37004400  | -2.05473000 | -0.74452400 |
| O | 3.15721000  | -2.19698300 | -1.92864300 |
| C | 4.69716400  | -2.38231300 | -0.14461600 |
| C | 4.87344700  | -2.55261100 | 1.23239000  |
| C | 5.78272200  | -2.55176300 | -1.01050400 |
| C | 6.12673600  | -2.88710400 | 1.73634000  |
| H | 4.03279600  | -2.45663500 | 1.91383400  |
| C | 7.03510100  | -2.86980700 | -0.50351300 |
| H | 5.61929900  | -2.42387000 | -2.07544000 |
| C | 7.20715100  | -3.03805600 | 0.87085100  |
| H | 6.25907600  | -3.03034900 | 2.80349300  |
| H | 7.87792500  | -2.98985300 | -1.17607400 |
| H | 8.18554500  | -3.29085400 | 1.26707500  |
| C | -0.93630000 | -0.67839800 | 2.40926000  |
| O | -1.63451400 | -0.90791100 | 0.13126100  |
| F | -1.78661000 | -1.56196900 | 2.94607500  |
| F | -1.57086400 | 0.51458000  | 2.42590900  |
| F | 0.12279200  | -0.56897500 | 3.22503000  |

**M5SS**

|   |            |             |             |
|---|------------|-------------|-------------|
| C | 3.73016300 | -0.50118700 | -0.94506900 |
| C | 4.77219100 | -1.01187400 | -1.93902500 |
| H | 3.26847700 | 0.42810300  | -1.29028400 |
| H | 4.37032100 | -1.01413600 | -2.96174200 |
| N | 2.66664900 | -1.52532100 | -0.94151900 |
| O | 5.18276900 | -2.31909100 | -1.56150700 |
| C | 2.85503600 | -2.82914600 | -1.32122700 |
| C | 4.19512100 | -3.28932400 | -1.82372500 |
| H | 4.49173900 | -4.21334300 | -1.32450000 |
| H | 4.11082800 | -3.48427600 | -2.90242300 |
| N | 1.74097100 | -3.50052200 | -1.27169000 |



|   |             |             |             |
|---|-------------|-------------|-------------|
| C | 1.36585300  | -1.38050700 | -0.64604600 |
| N | 0.82111200  | -2.57916500 | -0.84688600 |
| C | -0.58194900 | -2.89485700 | -0.75670000 |
| C | -1.07045800 | -3.43297600 | 0.43807800  |
| C | -1.39299500 | -2.60760100 | -1.85747000 |
| C | -2.44695000 | -3.60821000 | 0.54292400  |
| C | -2.76724800 | -2.79641700 | -1.69679100 |
| C | -3.30988500 | -3.27579400 | -0.50488700 |
| H | -2.85745000 | -4.00188600 | 1.46927900  |
| H | -3.42636500 | -2.55555500 | -2.52757400 |
| H | 5.65684700  | -0.37421600 | -1.90297200 |
| C | 4.31713800  | -0.33064300 | 0.46298400  |
| H | 3.49226700  | -0.23753300 | 1.16864200  |
| H | 4.88674500  | -1.23288100 | 0.70783600  |
| C | 5.19019100  | 0.89734400  | 0.53542700  |
| C | 4.59595700  | 2.15762300  | 0.66051100  |
| C | 6.58051800  | 0.80512700  | 0.45111200  |
| C | 5.38417500  | 3.30360300  | 0.69955600  |
| H | 3.51186400  | 2.22407000  | 0.72755700  |
| C | 7.36999400  | 1.95282000  | 0.49044700  |
| H | 7.04594000  | -0.17392900 | 0.35982600  |
| C | 6.77220600  | 3.20385500  | 0.61393900  |
| H | 4.91463300  | 4.27696300  | 0.80105100  |
| H | 8.45036900  | 1.86822600  | 0.42752500  |
| H | 7.38516600  | 4.09897200  | 0.64564300  |
| C | -4.79558800 | -3.46420100 | -0.34996900 |
| H | -5.12436400 | -3.13653800 | 0.63943800  |
| H | -5.34634400 | -2.89334700 | -1.10146000 |
| H | -5.06537000 | -4.51926400 | -0.46286800 |
| C | -0.13960400 | -3.78473400 | 1.56766900  |
| H | 0.66103100  | -4.44421800 | 1.22044700  |
| H | 0.33331900  | -2.89378100 | 1.99121800  |
| H | -0.68394700 | -4.29074600 | 2.36605500  |
| C | -0.80770500 | -2.13238900 | -3.15912300 |
| H | -0.31640100 | -1.16380400 | -3.01836900 |
| H | -0.06417300 | -2.84797300 | -3.52532900 |
| H | -1.59171700 | -2.03638200 | -3.91250800 |
| C | -1.79972800 | 0.54595600  | 0.16023500  |
| C | -0.47809600 | -0.03782400 | 0.63521300  |
| H | -2.00628400 | 0.04892500  | -0.79350900 |
| C | -2.97089700 | 0.29513600  | 1.08590500  |
| C | -4.19014500 | -0.12083700 | 0.54260100  |
| C | -2.88174800 | 0.49264000  | 2.46682200  |
| C | -5.29851400 | -0.33361600 | 1.35764200  |

|   |             |             |             |
|---|-------------|-------------|-------------|
| H | -4.26546600 | -0.27923800 | -0.53185200 |
| C | -3.98813500 | 0.27368300  | 3.28352000  |
| H | -1.94370300 | 0.81481900  | 2.91005800  |
| C | -5.19892800 | -0.13830300 | 2.73281300  |
| H | -6.23809700 | -0.65495200 | 0.91772700  |
| H | -3.90293200 | 0.42971000  | 4.35432000  |
| H | -6.06026700 | -0.30571900 | 3.37182100  |
| C | 0.60957600  | -0.04102300 | -0.50489900 |
| O | 0.36095400  | 0.37289500  | -1.69286900 |
| H | -0.64855400 | -0.99490500 | 1.13163800  |
| C | -0.05860700 | 2.23312900  | 1.74673000  |
| C | 0.28115800  | 3.14419100  | 2.72422300  |
| H | 1.05645900  | 3.01390300  | 3.46417500  |
| C | -0.58334800 | 4.25465300  | 2.57478700  |
| H | -0.60158500 | 5.14922100  | 3.17942100  |
| C | -1.42141400 | 3.99014600  | 1.51552300  |
| H | -2.22055000 | 4.57196100  | 1.09240700  |
| N | -1.11140700 | 2.75205000  | 1.01762200  |
| C | 0.48239000  | 0.89212400  | 1.39989300  |
| O | 1.45075200  | 0.87226400  | 0.33793600  |
| C | 1.12265900  | 0.22154700  | 2.60296800  |
| F | 1.57604700  | -1.01037400 | 2.27006100  |
| F | 0.27321200  | 0.06165700  | 3.62266200  |
| F | 2.18591000  | 0.90384900  | 3.04882800  |
| C | -1.61477800 | 2.06083400  | -0.16491600 |
| H | -0.84972000 | 2.11765600  | -0.94640300 |
| C | -2.92919500 | 2.59702200  | -0.71459900 |
| O | -3.65767500 | 3.32824100  | -0.07590300 |
| C | -3.33616100 | 2.11612700  | -2.07819400 |
| C | -2.48470300 | 1.40097300  | -2.93067900 |
| C | -4.64395400 | 2.40393800  | -2.48395800 |
| C | -2.95101700 | 0.98482400  | -4.17565300 |
| H | -1.46568300 | 1.15450700  | -2.63569100 |
| C | -5.10219900 | 1.98410300  | -3.72572000 |
| H | -5.28456600 | 2.95736700  | -1.80550000 |
| C | -4.25407400 | 1.27267900  | -4.57408000 |
| H | -2.28764100 | 0.43698300  | -4.83760100 |
| H | -6.11810900 | 2.20940500  | -4.03353300 |
| H | -4.60979300 | 0.94357900  | -5.54552600 |

**TS6RR**

|   |            |            |            |
|---|------------|------------|------------|
| C | 3.97128300 | 1.21496900 | 0.17040800 |
| C | 5.14010300 | 2.17272700 | 0.39778000 |
| H | 3.68877800 | 0.72591800 | 1.10771100 |

|   |             |             |             |
|---|-------------|-------------|-------------|
| H | 4.96659500  | 2.78592500  | 1.29405400  |
| N | 2.83608600  | 2.03728000  | -0.25291500 |
| O | 5.31626500  | 3.00565100  | -0.73847200 |
| C | 2.95005600  | 3.29793800  | -0.78450700 |
| C | 4.28992200  | 3.97097300  | -0.84518900 |
| H | 4.41392700  | 4.48599500  | -1.79887600 |
| H | 4.36765100  | 4.70934800  | -0.03363900 |
| N | 1.78759300  | 3.75344900  | -1.14757200 |
| C | 1.54067300  | 1.64087900  | -0.28956200 |
| N | 0.94296300  | 2.71259200  | -0.82787200 |
| C | -0.45883500 | 2.75174500  | -1.12855500 |
| C | -0.85882000 | 2.44731500  | -2.43544900 |
| C | -1.36992400 | 2.98760300  | -0.09755500 |
| C | -2.22377500 | 2.34642600  | -2.68421900 |
| C | -2.73041000 | 2.85934900  | -0.39306300 |
| C | -3.17197900 | 2.52460100  | -1.67192500 |
| H | -2.56036300 | 2.10042200  | -3.68842400 |
| H | -3.45708500 | 3.00604700  | 0.40227300  |
| H | 6.06454100  | 1.60685200  | 0.52916500  |
| C | 4.27114900  | 0.15332900  | -0.89928300 |
| H | 3.32364200  | -0.31932000 | -1.18023900 |
| H | 4.67471900  | 0.66131400  | -1.78198200 |
| C | 5.23430600  | -0.88438900 | -0.37981400 |
| C | 4.77084500  | -1.88191200 | 0.48421400  |
| C | 6.59140600  | -0.84799900 | -0.70589600 |
| C | 5.64964400  | -2.82306100 | 1.01096400  |
| H | 3.71260500  | -1.91595100 | 0.73245900  |
| C | 7.47277500  | -1.79090900 | -0.17963000 |
| H | 6.95720600  | -0.07830100 | -1.38174200 |
| C | 7.00339300  | -2.77923000 | 0.68075900  |
| H | 5.27695100  | -3.59457700 | 1.67746000  |
| H | 8.52476800  | -1.75410300 | -0.44487100 |
| H | 7.68862500  | -3.51479400 | 1.08983000  |
| C | -4.63619400 | 2.33477800  | -1.97302200 |
| H | -5.24866800 | 2.48745500  | -1.08092500 |
| H | -4.97386800 | 3.03484100  | -2.74316400 |
| H | -4.82087800 | 1.32183400  | -2.35184800 |
| C | 0.16433000  | 2.21549100  | -3.51277200 |
| H | 0.80232700  | 3.09452000  | -3.64143300 |
| H | 0.80071300  | 1.36779600  | -3.24292200 |
| H | -0.32394800 | 1.99632500  | -4.46457300 |
| C | -0.91614400 | 3.37671700  | 1.28662100  |
| H | -0.02336400 | 2.82633400  | 1.59662500  |
| H | -0.66347700 | 4.44151300  | 1.31937800  |

|   |             |             |             |
|---|-------------|-------------|-------------|
| H | -1.70888500 | 3.19156500  | 2.01469100  |
| C | -1.91513900 | -0.61513700 | 0.24340700  |
| C | -0.51879100 | -0.17525700 | 0.65374500  |
| H | -2.15342200 | -0.01971800 | -0.64714000 |
| C | -2.99012800 | -0.35587600 | 1.27888900  |
| C | -4.24328400 | 0.09616500  | 0.85286400  |
| C | -2.78079600 | -0.56671200 | 2.64323400  |
| C | -5.26306700 | 0.34135600  | 1.76620800  |
| H | -4.41524500 | 0.25961900  | -0.20866300 |
| C | -3.80063000 | -0.31977900 | 3.55992100  |
| H | -1.82053700 | -0.92420800 | 3.00065800  |
| C | -5.04232100 | 0.13514200  | 3.12622900  |
| H | -6.22761400 | 0.69482700  | 1.41496300  |
| H | -3.62130100 | -0.48724100 | 4.61710100  |
| H | -5.83387300 | 0.32638000  | 3.84366100  |
| C | 0.49238900  | -0.31660500 | -0.49191100 |
| O | 0.36226800  | -0.36217300 | -1.69363100 |
| H | -0.53543900 | 0.79936800  | 1.13485400  |
| C | -0.21912300 | -2.52855500 | 1.60291300  |
| C | 0.11891600  | -3.55005600 | 2.46283400  |
| H | 0.93965200  | -3.53325500 | 3.16431300  |
| C | -0.81083700 | -4.59552700 | 2.25295400  |
| H | -0.84826800 | -5.54418500 | 2.76710500  |
| C | -1.68514100 | -4.18369400 | 1.27332300  |
| H | -2.53581100 | -4.67956800 | 0.84032400  |
| N | -1.33759100 | -2.91722500 | 0.88508600  |
| C | 0.40066800  | -1.20116000 | 1.35897600  |
| O | 1.33096500  | -1.17316600 | 0.23230600  |
| C | 1.15382300  | -0.68375200 | 2.57628300  |
| F | 1.59585900  | 0.57027100  | 2.39288600  |
| F | 2.22850800  | -1.44435300 | 2.83039600  |
| F | 0.38843600  | -0.67516500 | 3.67397600  |
| C | -1.86429200 | -2.10581300 | -0.20545200 |
| H | -1.17081500 | -2.17864000 | -1.05104500 |
| C | -3.25251500 | -2.49837500 | -0.69386700 |
| O | -3.99617900 | -3.20047600 | -0.04260400 |
| C | -3.70054200 | -1.90465300 | -1.99901200 |
| C | -2.85045200 | -1.21937200 | -2.87648300 |
| C | -5.05253800 | -2.06100200 | -2.32737100 |
| C | -3.35416300 | -0.71930700 | -4.07527100 |
| H | -1.79976100 | -1.05726800 | -2.64618000 |
| C | -5.55164500 | -1.54874000 | -3.51730400 |
| H | -5.69329500 | -2.59066300 | -1.63035500 |
| C | -4.69914500 | -0.88127900 | -4.39741300 |

|   |             |             |             |
|---|-------------|-------------|-------------|
| H | -2.68714900 | -0.20416400 | -4.75925600 |
| H | -6.60115200 | -1.67266500 | -3.76294200 |
| H | -5.08410200 | -0.48748800 | -5.33277200 |

**TS6RS**

|   |             |             |             |
|---|-------------|-------------|-------------|
| C | 4.11316400  | 0.17946300  | 0.20032700  |
| C | 5.38542800  | 0.63541300  | 0.91212900  |
| H | 3.62747400  | -0.61616200 | 0.77128500  |
| H | 5.19052300  | 0.78825800  | 1.98370000  |
| N | 3.20484000  | 1.33299400  | 0.18804400  |
| O | 5.87332100  | 1.83389800  | 0.32905700  |
| C | 3.62154500  | 2.62604200  | 0.37996000  |
| C | 5.06159400  | 2.93722000  | 0.66805200  |
| H | 5.39009500  | 3.79091900  | 0.07339200  |
| H | 5.17325700  | 3.18817100  | 1.73316200  |
| N | 2.62084200  | 3.44983900  | 0.31023100  |
| C | 1.86418900  | 1.31480200  | -0.03686400 |
| N | 1.55290100  | 2.61406700  | 0.05297600  |
| C | 0.24188500  | 3.18906200  | -0.03983400 |
| C | -0.34504200 | 3.35597700  | -1.29770500 |
| C | -0.37722700 | 3.60157700  | 1.14373000  |
| C | -1.58935500 | 3.98269800  | -1.34670300 |
| C | -1.61903900 | 4.22701600  | 1.04205500  |
| C | -2.22837400 | 4.44093500  | -0.19436300 |
| H | -2.06928900 | 4.11986900  | -2.31268900 |
| H | -2.11520300 | 4.56283700  | 1.94973500  |
| H | 6.16439400  | -0.12039400 | 0.79872200  |
| C | 4.36745600  | -0.29398000 | -1.23867800 |
| H | 3.39744800  | -0.42147000 | -1.73115000 |
| H | 4.91245900  | 0.49793200  | -1.76403100 |
| C | 5.14404000  | -1.58686900 | -1.26845300 |
| C | 4.48776300  | -2.80090600 | -1.04004200 |
| C | 6.52376800  | -1.59516100 | -1.48691400 |
| C | 5.19962200  | -3.99672100 | -1.03313200 |
| H | 3.41299300  | -2.79591000 | -0.87414800 |
| C | 7.23777400  | -2.79159000 | -1.47957600 |
| H | 7.03885300  | -0.65434500 | -1.66800600 |
| C | 6.57629900  | -3.99537200 | -1.25236700 |
| H | 4.67792200  | -4.93317900 | -0.86165400 |
| H | 8.30889000  | -2.78276300 | -1.65523900 |
| H | 7.12965600  | -4.92900900 | -1.24970000 |
| C | -3.53849200 | 5.17864400  | -0.28936500 |
| H | -3.36707800 | 6.24704800  | -0.45673000 |
| H | -4.13950200 | 4.80441400  | -1.12176900 |

|   |             |             |             |
|---|-------------|-------------|-------------|
| H | -4.11965900 | 5.07816800  | 0.63092500  |
| C | 0.34955800  | 2.88851600  | -2.54773200 |
| H | 1.37278400  | 3.27476700  | -2.58981700 |
| H | 0.40977900  | 1.79629900  | -2.57820700 |
| H | -0.18782700 | 3.23508400  | -3.43235000 |
| C | 0.29075000  | 3.38478500  | 2.47594300  |
| H | 0.59630600  | 2.34091300  | 2.59680000  |
| H | 1.19336600  | 3.99692400  | 2.56081100  |
| H | -0.38431600 | 3.64709300  | 3.29237800  |
| C | -1.67374100 | -0.96834300 | -0.59478900 |
| C | -0.40215900 | -0.49770500 | 0.10863500  |
| H | -1.38905000 | -1.51890000 | -1.49859300 |
| C | -2.59819900 | 0.16179800  | -0.99362300 |
| C | -2.96123200 | 0.32015700  | -2.33164000 |
| C | -3.19943800 | 0.97171100  | -0.02578400 |
| C | -3.93553800 | 1.24758700  | -2.69491300 |
| H | -2.48972800 | -0.30270000 | -3.08668300 |
| C | -4.18799500 | 1.88088600  | -0.38352500 |
| H | -2.91902000 | 0.87190800  | 1.02102900  |
| C | -4.56561100 | 2.01407100  | -1.71863000 |
| H | -4.21402100 | 1.35563200  | -3.73835400 |
| H | -4.66555100 | 2.48618500  | 0.38105700  |
| H | -5.34650800 | 2.71574700  | -1.99595400 |
| C | 0.82028100  | -0.45672600 | -0.82636800 |
| O | 0.92499500  | -0.35002200 | -2.02251200 |
| H | -0.55698300 | 0.41046900  | 0.69356400  |
| C | -0.18257900 | -2.95590200 | 0.80454700  |
| C | 0.36571400  | -4.19521900 | 1.04744400  |
| H | 1.40136300  | -4.38404900 | 1.28951600  |
| C | -0.67708500 | -5.14455200 | 0.90814800  |
| H | -0.59766700 | -6.21609800 | 1.01394600  |
| C | -1.82570900 | -4.45464500 | 0.59279600  |
| H | -2.82336200 | -4.80647300 | 0.38284600  |
| N | -1.52017800 | -3.12299300 | 0.52364900  |
| C | 0.41492700  | -1.59134100 | 0.83487000  |
| C | -2.41483700 | -2.00310600 | 0.29269100  |
| H | -2.67818600 | -1.53877400 | 1.24912200  |
| C | -3.67556300 | -2.41055900 | -0.48153600 |
| O | -3.57636800 | -3.12239800 | -1.45826400 |
| C | -4.97181400 | -1.78822300 | -0.08667400 |
| C | -5.29497900 | -1.49894800 | 1.24227100  |
| C | -5.87405800 | -1.47618200 | -1.10780800 |
| C | -6.51504200 | -0.90356100 | 1.54519400  |
| H | -4.61138400 | -1.75595600 | 2.04574200  |

|   |             |             |             |
|---|-------------|-------------|-------------|
| C | -7.07939700 | -0.85610100 | -0.80428200 |
| H | -5.60067400 | -1.70553200 | -2.13255500 |
| C | -7.40081400 | -0.57139900 | 0.52234000  |
| H | -6.77221600 | -0.69442200 | 2.57810600  |
| H | -7.76932400 | -0.59430200 | -1.59953600 |
| H | -8.34465800 | -0.09117000 | 0.75972000  |
| O | 1.52862700  | -1.42509700 | -0.06737200 |
| C | 0.84820200  | -1.23689600 | 2.24947900  |
| F | -0.20819400 | -1.26920400 | 3.07357700  |
| F | 1.76812600  | -2.09453900 | 2.70468300  |
| F | 1.38634800  | -0.01017200 | 2.33828800  |

**TS6SR**

|   |             |             |             |
|---|-------------|-------------|-------------|
| C | -4.07217100 | 0.30654600  | -0.78450200 |
| C | -5.34694400 | 0.82388700  | -1.44901400 |
| H | -3.49928800 | -0.30538600 | -1.48789000 |
| H | -5.12150000 | 1.24484900  | -2.43917900 |
| N | -3.26151200 | 1.48745000  | -0.46530100 |
| O | -5.96085000 | 1.80500600  | -0.62576700 |
| C | -3.78301500 | 2.75005600  | -0.34300400 |
| C | -5.23339200 | 3.01443600  | -0.62712500 |
| H | -5.65953700 | 3.66239500  | 0.14031400  |
| H | -5.32211700 | 3.51918800  | -1.60027200 |
| N | -2.85770100 | 3.60476900  | -0.02732100 |
| C | -1.92734500 | 1.51776200  | -0.20330500 |
| N | -1.72733000 | 2.81646700  | 0.04846200  |
| C | -0.46975300 | 3.43187700  | 0.35685600  |
| C | -0.16687100 | 3.69600600  | 1.69542900  |
| C | 0.38531300  | 3.76989700  | -0.69500500 |
| C | 1.04697800  | 4.32254500  | 1.97109700  |
| C | 1.58057000  | 4.40885000  | -0.36977100 |
| C | 1.92560000  | 4.69230600  | 0.95113600  |
| H | 1.30646000  | 4.53559700  | 3.00562100  |
| H | 2.26366700  | 4.68015700  | -1.16981600 |
| H | -6.06240200 | 0.00768500  | -1.56372400 |
| C | -4.36380700 | -0.48396400 | 0.49939200  |
| H | -3.41399200 | -0.64398800 | 1.01508800  |
| H | -5.00066400 | 0.13479000  | 1.14063200  |
| C | -5.02830300 | -1.80634500 | 0.20752000  |
| C | -4.27583400 | -2.86778900 | -0.30732800 |
| C | -6.39743300 | -1.98719400 | 0.41455000  |
| C | -4.88227500 | -4.08514200 | -0.60118200 |
| H | -3.21173000 | -2.72481400 | -0.47866800 |
| C | -7.00596500 | -3.20622900 | 0.12162200  |

|   |             |             |             |
|---|-------------|-------------|-------------|
| H | -6.98830700 | -1.16478900 | 0.81122800  |
| C | -6.24879600 | -4.25844700 | -0.38563600 |
| H | -4.28695400 | -4.90144700 | -0.99864800 |
| H | -8.07048400 | -3.33312300 | 0.29164000  |
| H | -6.72033800 | -5.20916900 | -0.61281100 |
| C | 3.21190000  | 5.40835300  | 1.27273000  |
| H | 3.68650400  | 4.98771900  | 2.16363600  |
| H | 3.91704800  | 5.33975400  | 0.44105100  |
| H | 3.02671800  | 6.46920700  | 1.47004000  |
| C | -1.13050300 | 3.31495400  | 2.78748000  |
| H | -2.09728700 | 3.80468700  | 2.63889000  |
| H | -1.30892300 | 2.23606500  | 2.79047300  |
| H | -0.74026000 | 3.60494300  | 3.76447000  |
| C | 0.01687300  | 3.46689100  | -2.12239400 |
| H | -0.07268700 | 2.38871300  | -2.29095400 |
| H | -0.94809400 | 3.91777300  | -2.37633700 |
| H | 0.77601000  | 3.86092000  | -2.80096600 |
| C | 1.79381700  | -0.44108900 | -0.90835100 |
| C | 0.48086300  | -0.16670400 | -0.16596200 |
| H | 1.55932000  | -0.78153900 | -1.92181400 |
| C | 2.67964600  | 0.78614100  | -1.00949500 |
| C | 2.94106200  | 1.36054000  | -2.25452300 |
| C | 3.30943400  | 1.31308200  | 0.12243800  |
| C | 3.83738500  | 2.41982100  | -2.37249800 |
| H | 2.45126400  | 0.95663900  | -3.13608200 |
| C | 4.22052100  | 2.35853700  | 0.00445500  |
| H | 3.09754300  | 0.90297500  | 1.10741900  |
| C | 4.49439700  | 2.90839300  | -1.24545800 |
| H | 4.03621900  | 2.85000200  | -3.34908000 |
| H | 4.71397900  | 2.74590700  | 0.89057200  |
| H | 5.21050000  | 3.71928800  | -1.33969900 |
| C | -0.75134200 | -0.07573500 | -1.08920200 |
| O | -0.87467700 | 0.17422100  | -2.26359800 |
| H | 0.56522600  | 0.66109900  | 0.54016000  |
| C | 0.38063900  | -2.70968900 | 0.18012200  |
| C | -0.11737000 | -3.99293800 | 0.22526200  |
| H | -1.13778800 | -4.26032000 | 0.45897900  |
| C | 0.95209200  | -4.86420600 | -0.09664600 |
| H | 0.91472400  | -5.94101800 | -0.16512100 |
| C | 2.06592300  | -4.08653500 | -0.31940500 |
| H | 3.07382900  | -4.36449100 | -0.58936000 |
| N | 1.71168400  | -2.77310800 | -0.15449000 |
| C | -0.27144400 | -1.39160900 | 0.40737600  |
| C | 2.56299900  | -1.59130200 | -0.23283300 |



|   |             |             |             |
|---|-------------|-------------|-------------|
| H | 2.84814100  | -1.29174300 | 0.78200800  |
| C | 3.82911100  | -1.92376500 | -1.04942900 |
| O | 3.80794700  | -1.80691100 | -2.25550700 |
| C | 5.05296800  | -2.37168200 | -0.32553900 |
| C | 5.01732500  | -2.80389600 | 1.00443300  |
| C | 6.26293500  | -2.38052500 | -1.02838600 |
| C | 6.18471600  | -3.23789800 | 1.62482800  |
| H | 4.07983900  | -2.83249900 | 1.55231600  |
| C | 7.42829900  | -2.79990600 | -0.40184500 |
| H | 6.26467100  | -2.04908900 | -2.06128200 |
| C | 7.38903000  | -3.22884100 | 0.92534000  |
| H | 6.15365700  | -3.58248900 | 2.65272500  |
| H | 8.36767500  | -2.79605300 | -0.94429800 |
| H | 8.29973800  | -3.55977300 | 1.41401300  |
| C | -0.70047600 | -1.25195700 | 1.85855800  |
| O | -1.40175800 | -1.16649000 | -0.45667500 |
| F | -1.60097900 | -2.18603700 | 2.18753500  |
| F | -1.25953000 | -0.06063800 | 2.11881900  |
| F | 0.36075000  | -1.38134100 | 2.66646000  |

**TS6SS**

|   |             |             |             |
|---|-------------|-------------|-------------|
| C | 3.81148000  | -0.72819300 | -1.06976300 |
| C | 4.89104800  | -1.17338700 | -2.05478000 |
| H | 3.36158400  | 0.21625900  | -1.39503200 |
| H | 4.53068100  | -1.07312400 | -3.08874600 |
| N | 2.76336000  | -1.74882200 | -1.11707600 |
| O | 5.26333000  | -2.51884200 | -1.79336200 |
| C | 2.94019200  | -3.02446100 | -1.58961900 |
| C | 4.25642900  | -3.42927600 | -2.18681300 |
| H | 4.54765900  | -4.42015400 | -1.83487200 |
| H | 4.16739400  | -3.45796500 | -3.28268400 |
| N | 1.84740600  | -3.71904800 | -1.46542300 |
| C | 1.50236400  | -1.60434000 | -0.64150500 |
| N | 0.98201200  | -2.81402500 | -0.88732700 |
| C | -0.36494700 | -3.15149100 | -0.53188500 |
| C | -0.59201600 | -3.75426500 | 0.70913000  |
| C | -1.40252900 | -2.73468400 | -1.37012700 |
| C | -1.91359800 | -3.89355300 | 1.12752300  |
| C | -2.70869000 | -2.88634100 | -0.90279000 |
| C | -2.98066300 | -3.44117000 | 0.34799100  |
| H | -2.11384300 | -4.34677200 | 2.09562200  |
| H | -3.53369600 | -2.54907300 | -1.52635400 |
| H | 5.78617100  | -0.56096700 | -1.93048400 |
| C | 4.32807100  | -0.59377900 | 0.37076000  |

|   |             |             |             |
|---|-------------|-------------|-------------|
| H | 3.45581100  | -0.50533000 | 1.02580500  |
| H | 4.85595000  | -1.51834500 | 0.62953600  |
| C | 5.22405200  | 0.60700000  | 0.53733100  |
| C | 4.65812900  | 1.87451500  | 0.70970600  |
| C | 6.61449800  | 0.48668400  | 0.48946800  |
| C | 5.47009800  | 2.99805800  | 0.82968100  |
| H | 3.57511600  | 1.96761900  | 0.75436500  |
| C | 7.42853600  | 1.61099000  | 0.60979600  |
| H | 7.06009700  | -0.49763200 | 0.36313600  |
| C | 6.85710100  | 2.86924400  | 0.77908800  |
| H | 5.01973900  | 3.97618400  | 0.96689000  |
| H | 8.50805000  | 1.50264700  | 0.57458200  |
| H | 7.48962700  | 3.74617700  | 0.87407100  |
| C | -4.38994200 | -3.52403100 | 0.87025100  |
| H | -4.55711200 | -2.74549900 | 1.62205400  |
| H | -5.12004200 | -3.37340600 | 0.07200500  |
| H | -4.58101100 | -4.49298200 | 1.33939700  |
| C | 0.56309400  | -4.20132500 | 1.56478800  |
| H | 1.20279700  | -4.90183300 | 1.02083000  |
| H | 1.18327100  | -3.34766100 | 1.85300400  |
| H | 0.20363500  | -4.68817100 | 2.47286400  |
| C | -1.11605300 | -2.11920800 | -2.71464800 |
| H | -0.60269900 | -1.15736000 | -2.61149600 |
| H | -0.46875300 | -2.77201800 | -3.30813400 |
| H | -2.04584400 | -1.95954100 | -3.26534800 |
| C | -1.96032900 | 0.73474800  | -0.10282300 |
| C | -0.63775800 | 0.14218900  | 0.36764600  |
| H | -2.12652600 | 0.31687900  | -1.10289000 |
| C | -3.16325200 | 0.38755800  | 0.75069500  |
| C | -4.38549800 | 0.12252300  | 0.12312600  |
| C | -3.10284800 | 0.35870500  | 2.14497700  |
| C | -5.52783600 | -0.14289800 | 0.87109000  |
| H | -4.44065300 | 0.13419000  | -0.96373700 |
| C | -4.24445400 | 0.08310900  | 2.89531300  |
| H | -2.16595000 | 0.55450500  | 2.65676400  |
| C | -5.46019900 | -0.15994700 | 2.26273600  |
| H | -6.46856600 | -0.34195000 | 0.36744700  |
| H | -4.18107200 | 0.06622300  | 3.97856500  |
| H | -6.34912300 | -0.36906200 | 2.84930800  |
| C | 0.50225500  | 0.42481300  | -0.62221300 |
| O | 0.53230800  | 0.65477000  | -1.81045100 |
| H | -0.74395100 | -0.90234600 | 0.66021400  |
| C | -0.35706100 | 2.28712400  | 1.74123400  |
| C | -0.08608500 | 3.12044700  | 2.80439400  |

|   |             |             |             |
|---|-------------|-------------|-------------|
| H | 0.64338800  | 2.93459900  | 3.57857300  |
| C | -0.94661700 | 4.23691600  | 2.68636700  |
| H | -1.00928500 | 5.08119200  | 3.35632900  |
| C | -1.71398600 | 4.05438800  | 1.55884600  |
| H | -2.48941500 | 4.66649000  | 1.13357800  |
| N | -1.36679600 | 2.85869600  | 0.98785500  |
| C | 0.23243400  | 0.98803000  | 1.33244300  |
| O | 1.27584100  | 1.10765500  | 0.31319500  |
| C | 0.83802100  | 0.24373500  | 2.51365800  |
| F | 1.23903400  | -0.98817800 | 2.17219800  |
| F | -0.03279400 | 0.11293300  | 3.52192200  |
| F | 1.91404400  | 0.89348800  | 2.97724600  |
| C | -1.78816200 | 2.27610400  | -0.27975700 |
| H | -0.98947200 | 2.44112800  | -1.01212500 |
| C | -3.07755100 | 2.84740800  | -0.85652200 |
| O | -3.86405900 | 3.48098700  | -0.18566900 |
| C | -3.37593400 | 2.52201700  | -2.29084100 |
| C | -2.45434600 | 1.92821700  | -3.16329300 |
| C | -4.66217800 | 2.82939900  | -2.74833000 |
| C | -2.82563400 | 1.65085600  | -4.47629600 |
| H | -1.44885000 | 1.66897900  | -2.84083200 |
| C | -5.02749500 | 2.54936600  | -4.05815000 |
| H | -5.36010900 | 3.28469200  | -2.05384600 |
| C | -4.10744500 | 1.95942900  | -4.92424700 |
| H | -2.10808300 | 1.19387300  | -5.14961300 |
| H | -6.02713600 | 2.78877300  | -4.40536200 |
| H | -4.39005500 | 1.73913300  | -5.94883700 |

### M6RR

|   |             |             |             |
|---|-------------|-------------|-------------|
| C | -1.81925500 | -0.92970900 | 0.09670300  |
| C | -0.43571000 | -0.41664700 | 0.49343600  |
| H | -2.03392400 | -0.49144500 | -0.88392500 |
| C | -2.93547600 | -0.53146500 | 1.04054000  |
| C | -4.15865400 | -0.12650500 | 0.49922400  |
| C | -2.79440800 | -0.58821100 | 2.42942100  |
| C | -5.22327700 | 0.21499700  | 1.32703300  |
| H | -4.27680900 | -0.08049100 | -0.58132500 |
| C | -3.85919300 | -0.24266000 | 3.25737200  |
| H | -1.85470900 | -0.90024900 | 2.87550400  |
| C | -5.07491500 | 0.15736000  | 2.71010800  |
| H | -6.16589300 | 0.53001200  | 0.89125300  |
| H | -3.73571200 | -0.28963300 | 4.33442400  |
| H | -5.90285000 | 0.42545100  | 3.35828100  |
| C | 0.61823500  | -0.70446800 | -0.56627700 |

|   |             |             |             |
|---|-------------|-------------|-------------|
| O | 0.78703500  | -0.43953800 | -1.71584500 |
| H | -0.46540600 | 0.62208200  | 0.82847600  |
| C | -0.20413100 | -2.60362500 | 1.81877700  |
| C | 0.05812200  | -3.44190100 | 2.88016600  |
| H | 0.84164800  | -3.30793000 | 3.61032900  |
| C | -0.89580300 | -4.48430200 | 2.82659300  |
| H | -0.98867000 | -5.31261300 | 3.51250000  |
| C | -1.70713800 | -4.25524500 | 1.73855300  |
| H | -2.55080200 | -4.80903900 | 1.36712800  |
| N | -1.29613100 | -3.09979800 | 1.12915500  |
| C | 0.44010300  | -1.35916100 | 1.35588900  |
| O | 1.35656200  | -1.54160500 | 0.21392500  |
| C | 1.21942300  | -0.63406100 | 2.44124900  |
| F | 1.77529600  | 0.47914700  | 1.94771500  |
| F | 2.19879800  | -1.39155000 | 2.93925100  |
| F | 0.41218800  | -0.27644000 | 3.44636000  |
| C | -1.74591200 | -2.47595600 | -0.10632400 |
| H | -1.00146700 | -2.68969600 | -0.88449100 |
| C | -3.10517800 | -2.95331300 | -0.61210900 |
| O | -3.89452500 | -3.51911200 | 0.11233500  |
| C | -3.45978300 | -2.61301100 | -2.02768900 |
| C | -2.54890400 | -2.09463000 | -2.95720800 |
| C | -4.78850100 | -2.82818800 | -2.41184700 |
| C | -2.96695300 | -1.80214600 | -4.25166500 |
| H | -1.51122600 | -1.90867900 | -2.69561000 |
| C | -5.20227600 | -2.53287900 | -3.70355100 |
| H | -5.48000300 | -3.22690800 | -1.67743900 |
| C | -4.29037300 | -2.02025800 | -4.62570800 |
| H | -2.25600100 | -1.40291500 | -4.96674400 |
| H | -6.23420300 | -2.70083900 | -3.99315900 |
| H | -4.61177700 | -1.78869400 | -5.63607600 |

### **M6RS**

|   |             |             |             |
|---|-------------|-------------|-------------|
| C | -1.83656000 | -0.90458000 | -0.38069000 |
| C | -0.74256100 | -0.26733000 | 0.48202500  |
| H | -1.38562000 | -1.32604500 | -1.28691100 |
| C | -2.92546300 | 0.06424800  | -0.78769600 |
| C | -3.26417100 | 0.19662900  | -2.13417500 |
| C | -3.67622800 | 0.74761900  | 0.17306400  |
| C | -4.33840300 | 0.99597000  | -2.51714500 |
| H | -2.69084100 | -0.34076300 | -2.88454100 |
| C | -4.75353900 | 1.54049300  | -0.20701700 |
| H | -3.43575100 | 0.64719600  | 1.22963200  |
| C | -5.08812200 | 1.66452000  | -1.55403700 |

|   |             |             |             |
|---|-------------|-------------|-------------|
| H | -4.59050900 | 1.09124800  | -3.56829500 |
| H | -5.33510700 | 2.05738300  | 0.54929400  |
| H | -5.93071800 | 2.28085200  | -1.84979800 |
| C | 0.50753900  | 0.15447100  | -0.28225700 |
| O | 0.79409700  | 0.93577000  | -1.12953100 |
| H | -1.13415300 | 0.50270300  | 1.15013100  |
| C | -0.08867600 | -2.69433800 | 1.00231500  |
| C | 0.65670100  | -3.83017200 | 1.22651200  |
| H | 1.69092700  | -3.84907700 | 1.53724400  |
| C | -0.18507000 | -4.93644900 | 0.95812300  |
| H | 0.07935100  | -5.98150900 | 1.01624500  |
| C | -1.41608500 | -4.44138000 | 0.58962000  |
| H | -2.31814600 | -4.95168900 | 0.29081700  |
| N | -1.35394300 | -3.07622300 | 0.60871400  |
| C | 0.23481500  | -1.25695200 | 1.15104000  |
| C | -2.42527700 | -2.12334900 | 0.37696300  |
| H | -2.83510900 | -1.78429400 | 1.33462900  |
| C | -3.52744700 | -2.69759200 | -0.52586900 |
| O | -3.21419500 | -3.29217800 | -1.53548700 |
| C | -4.94617600 | -2.37814000 | -0.20308600 |
| C | -5.40667900 | -2.21444900 | 1.10674700  |
| C | -5.83012600 | -2.23077100 | -1.27678000 |
| C | -6.74408900 | -1.90908500 | 1.33731700  |
| H | -4.73767900 | -2.34937700 | 1.95097700  |
| C | -7.15869100 | -1.90193800 | -1.04388500 |
| H | -5.44909600 | -2.35911800 | -2.28459700 |
| C | -7.61593700 | -1.74284500 | 0.26395100  |
| H | -7.10523800 | -1.79808700 | 2.35414000  |
| H | -7.83950800 | -1.76953400 | -1.87805200 |
| H | -8.65541900 | -1.49026900 | 0.44728100  |
| O | 1.32385000  | -0.77265300 | 0.31055400  |
| C | 0.55064400  | -0.87902100 | 2.58999000  |
| F | -0.52073700 | -1.11522400 | 3.35950600  |
| F | 1.58103100  | -1.57091700 | 3.07523200  |
| F | 0.84569400  | 0.42377900  | 2.69039600  |

#### M6SR

|   |             |             |             |
|---|-------------|-------------|-------------|
| C | -0.89738300 | -1.08207200 | -1.11723800 |
| C | 0.39855200  | -1.42913100 | -1.86439100 |
| H | -0.76143000 | -0.15648300 | -0.54877100 |
| C | -2.06146900 | -0.90060800 | -2.07078300 |
| C | -2.76350100 | 0.30430500  | -2.10308900 |
| C | -2.46255300 | -1.94270500 | -2.91159900 |
| C | -3.84111500 | 0.46988300  | -2.96871000 |

|   |             |             |             |
|---|-------------|-------------|-------------|
| H | -2.46473000 | 1.11105000  | -1.44045400 |
| C | -3.54358000 | -1.78134500 | -3.77255300 |
| H | -1.92682900 | -2.89006400 | -2.90289800 |
| C | -4.23356400 | -0.57191000 | -3.80468600 |
| H | -4.37518900 | 1.41428800  | -2.98820000 |
| H | -3.84426300 | -2.59900500 | -4.41940100 |
| H | -5.07331300 | -0.44259400 | -4.47963600 |
| C | 1.37583600  | -0.27529800 | -2.05739800 |
| O | 1.38674200  | 0.78239700  | -2.59707700 |
| H | 0.20530400  | -1.98031800 | -2.78724300 |
| C | 1.25590700  | -2.25615300 | 0.40134900  |
| C | 2.07394400  | -2.46844400 | 1.48863300  |
| H | 3.15373200  | -2.47287000 | 1.46768000  |
| C | 1.23148200  | -2.65991800 | 2.60922500  |
| H | 1.53786100  | -2.84062400 | 3.62845300  |
| C | -0.07015300 | -2.56756400 | 2.16913800  |
| H | -1.00068500 | -2.65352600 | 2.71026200  |
| N | -0.05376700 | -2.31634100 | 0.82357700  |
| C | 1.55476900  | -2.01269400 | -1.02739800 |
| C | -1.19362300 | -2.17989100 | -0.07973400 |
| H | -1.36128700 | -3.13108500 | -0.59866200 |
| C | -2.44661800 | -1.79668100 | 0.73597700  |
| O | -2.66629500 | -0.62679600 | 0.96534200  |
| C | -3.35435600 | -2.87758900 | 1.21065600  |
| C | -2.98143700 | -4.22606000 | 1.19801500  |
| C | -4.60936200 | -2.50655200 | 1.70635000  |
| C | -3.86078200 | -5.19382500 | 1.67299600  |
| H | -1.99928900 | -4.52747800 | 0.84515000  |
| C | -5.48917700 | -3.47597100 | 2.16688300  |
| H | -4.87362600 | -1.45441700 | 1.71422400  |
| C | -5.11492500 | -4.82002200 | 2.14951200  |
| H | -3.56709700 | -6.23793200 | 1.67056800  |
| H | -6.46581900 | -3.18789300 | 2.54095900  |
| H | -5.80262700 | -5.57719200 | 2.51224700  |
| C | 2.21406000  | -3.20931400 | -1.69375000 |
| O | 2.36872800  | -0.83424500 | -1.29419400 |
| F | 3.35836400  | -3.54631400 | -1.09905400 |
| F | 2.47765200  | -2.96027700 | -2.98263300 |
| F | 1.38184700  | -4.25925400 | -1.64177300 |

**M6SS**

|   |             |            |             |
|---|-------------|------------|-------------|
| C | -1.88309700 | 0.89378300 | -0.01222700 |
| C | -0.52236600 | 0.32025400 | 0.38105800  |
| H | -2.11325800 | 0.47672600 | -0.99869900 |

|   |             |             |             |
|---|-------------|-------------|-------------|
| C | -3.01687500 | 0.53054200  | 0.92463700  |
| C | -4.25198500 | 0.17518100  | 0.37591900  |
| C | -2.87920000 | 0.57204600  | 2.31444300  |
| C | -5.33182000 | -0.13293200 | 1.19720800  |
| H | -4.36762400 | 0.14133400  | -0.70532300 |
| C | -3.95938400 | 0.26003300  | 3.13576300  |
| H | -1.92996000 | 0.84366500  | 2.76672700  |
| C | -5.18682500 | -0.09102000 | 2.58117500  |
| H | -6.28370800 | -0.40921900 | 0.75534900  |
| H | -3.83833000 | 0.29410600  | 4.21356000  |
| H | -6.02642700 | -0.33354900 | 3.22443300  |
| C | 0.54373000  | 0.57563100  | -0.67484700 |
| O | 0.70370400  | 0.31431900  | -1.82648900 |
| H | -0.59472100 | -0.71965300 | 0.70595900  |
| C | -0.20354900 | 2.48123700  | 1.73132600  |
| C | 0.09015400  | 3.29674000  | 2.80242700  |
| H | 0.86782600  | 3.12454100  | 3.53095500  |
| C | -0.82248600 | 4.37608100  | 2.76028300  |
| H | -0.88360100 | 5.19978400  | 3.45524400  |
| C | -1.64102000 | 4.19126500  | 1.66917000  |
| H | -2.46212600 | 4.78178100  | 1.30341100  |
| N | -1.27440700 | 3.02822700  | 1.04704600  |
| C | 0.39001400  | 1.21763700  | 1.25373600  |
| O | 1.31334500  | 1.37592900  | 0.11356500  |
| C | 1.13974800  | 0.44992500  | 2.33049800  |
| F | 1.65078400  | -0.67913200 | 1.82446500  |
| F | 0.31900900  | 0.11381100  | 3.33203400  |
| F | 2.14830000  | 1.16257700  | 2.83606400  |
| C | -1.74681700 | 2.43795400  | -0.19627900 |
| H | -0.99268800 | 2.63125000  | -0.97037200 |
| C | -3.08477000 | 2.97612600  | -0.69864000 |
| O | -3.85247200 | 3.56472600  | 0.03094500  |
| C | -3.44854100 | 2.66864500  | -2.11909900 |
| C | -2.55379800 | 2.13246700  | -3.05396900 |
| C | -4.76792900 | 2.93621000  | -2.50326800 |
| C | -2.97742300 | 1.87493400  | -4.35392300 |
| H | -1.52437600 | 1.90583700  | -2.79207800 |
| C | -5.18758000 | 2.67492400  | -3.80029000 |
| H | -5.44763400 | 3.34762700  | -1.76480400 |
| C | -4.29126900 | 2.14507600  | -4.72801400 |
| H | -2.27832100 | 1.46267100  | -5.07324400 |
| H | -6.21214900 | 2.88339700  | -4.08975200 |
| H | -4.61764600 | 1.94094100  | -5.74271000 |

**TS7RR**

|   |             |             |             |
|---|-------------|-------------|-------------|
| C | -1.80841900 | -0.91132600 | 0.15537800  |
| C | -0.41208700 | -0.48388900 | 0.58833300  |
| H | -1.94948400 | -0.45954400 | -0.83066600 |
| C | -2.95100300 | -0.48097000 | 1.05685000  |
| C | -4.19400600 | -0.20808600 | 0.47453700  |
| C | -2.81970800 | -0.34683200 | 2.44144200  |
| C | -5.28164200 | 0.17059500  | 1.25364700  |
| H | -4.30695400 | -0.28646900 | -0.60451800 |
| C | -3.90749100 | 0.03607800  | 3.22314300  |
| H | -1.86461700 | -0.52115600 | 2.92718500  |
| C | -5.14172500 | 0.29055600  | 2.63387200  |
| H | -6.23583500 | 0.37900500  | 0.78069300  |
| H | -3.78419700 | 0.13971800  | 4.29639600  |
| H | -5.98730400 | 0.58915900  | 3.24475200  |
| C | 0.65689300  | -0.78839500 | -0.54233300 |
| O | 0.33768900  | -0.62810300 | -1.71679800 |
| H | -0.37905000 | 0.57752000  | 0.84828700  |
| C | -0.29672900 | -2.57465100 | 1.91784800  |
| C | 0.01844600  | -3.53273100 | 2.92336700  |
| H | 0.77483800  | -3.39760100 | 3.68247400  |
| C | -0.82435600 | -4.60240200 | 2.74741500  |
| H | -0.87974000 | -5.50420900 | 3.33737600  |
| C | -1.64121500 | -4.31802600 | 1.62542600  |
| H | -2.41312200 | -4.92253000 | 1.17600000  |
| N | -1.33963300 | -3.11568900 | 1.14522500  |
| C | 0.18803500  | -1.32245400 | 1.65282500  |
| O | 1.70566200  | -1.25166600 | -0.01838800 |
| C | 1.20593000  | -0.72939300 | 2.60326200  |
| F | 1.66886400  | 0.44056400  | 2.18563000  |
| F | 2.22971700  | -1.54972200 | 2.82647600  |
| F | 0.59461200  | -0.52046300 | 3.78985800  |
| C | -1.77778400 | -2.44884000 | -0.08662900 |
| H | -1.01248300 | -2.64751900 | -0.84536300 |
| C | -3.12200500 | -2.95342500 | -0.60055700 |
| O | -3.87523800 | -3.57929900 | 0.11736500  |
| C | -3.47792300 | -2.60564400 | -2.00698100 |
| C | -2.57992300 | -2.00667100 | -2.90099900 |
| C | -4.78116500 | -2.90670000 | -2.42195200 |
| C | -2.99308100 | -1.72105000 | -4.19920500 |
| H | -1.56528500 | -1.74277000 | -2.60876700 |
| C | -5.18587800 | -2.61559000 | -3.71669100 |
| H | -5.45892600 | -3.36587500 | -1.71009400 |
| C | -4.28957800 | -2.02367400 | -4.60704900 |



|   |             |             |             |
|---|-------------|-------------|-------------|
| H | -2.29695800 | -1.25908500 | -4.89069000 |
| H | -6.19677800 | -2.84819300 | -4.03427600 |
| H | -4.60405600 | -1.79549700 | -5.62050000 |

**TS7SR**

|   |             |             |             |
|---|-------------|-------------|-------------|
| C | -1.72507600 | -1.83900200 | -1.01204000 |
| C | -0.58922000 | -0.82665400 | -1.12097400 |
| H | -2.61188900 | -1.25031500 | -0.75124000 |
| C | -2.00773900 | -2.61930100 | -2.28351300 |
| C | -3.32351000 | -3.00877700 | -2.55334600 |
| C | -1.00244900 | -2.99163400 | -3.17894000 |
| C | -3.62942800 | -3.75962500 | -3.68376200 |
| H | -4.11821400 | -2.70101000 | -1.87710300 |
| C | -1.30681400 | -3.74238400 | -4.31262000 |
| H | 0.02705000  | -2.68738500 | -3.01209500 |
| C | -2.61831000 | -4.13169300 | -4.56655300 |
| H | -4.65819700 | -4.04338100 | -3.88122300 |
| H | -0.51394200 | -4.01796700 | -5.00045200 |
| H | -2.85401000 | -4.71261400 | -5.45211000 |
| C | -0.56633900 | 0.22484000  | 0.09297900  |
| O | -1.64121200 | 0.62086700  | 0.52043800  |
| H | -0.66636500 | -0.25160800 | -2.04764100 |
| C | 0.97452700  | -2.56698900 | -0.31066700 |
| C | 2.14176300  | -3.33175000 | -0.03455400 |
| H | 3.14920400  | -3.02614400 | -0.27594700 |
| C | 1.73454000  | -4.50304700 | 0.56382700  |
| H | 2.35168400  | -5.32212500 | 0.89896300  |
| C | 0.32622600  | -4.44996500 | 0.66386900  |
| H | -0.35991800 | -5.17039700 | 1.08961800  |
| N | -0.11864000 | -3.31962100 | 0.12846200  |
| C | 0.76908300  | -1.36303200 | -0.93524900 |
| C | -1.48097800 | -2.80655100 | 0.17571500  |
| H | -2.14986800 | -3.66667300 | 0.07792100  |
| C | -1.70802600 | -2.13632000 | 1.55091000  |
| O | -0.76581700 | -1.94964600 | 2.28597700  |
| C | -3.10062400 | -1.75314300 | 1.91425900  |
| C | -4.22508800 | -2.33988300 | 1.32753500  |
| C | -3.25866700 | -0.77781800 | 2.90307700  |
| C | -5.50035900 | -1.95859900 | 1.73453700  |
| H | -4.12323100 | -3.10615500 | 0.56436700  |
| C | -4.53155700 | -0.39396800 | 3.30090400  |
| H | -2.36968100 | -0.32236800 | 3.32518000  |
| C | -5.65273900 | -0.98561100 | 2.71871200  |
| H | -6.37222000 | -2.42092000 | 1.28409200  |

|   |             |             |             |
|---|-------------|-------------|-------------|
| H | -4.65372700 | 0.37112800  | 4.06000800  |
| H | -6.64756300 | -0.68440100 | 3.03081000  |
| C | 1.95047500  | -0.69271900 | -1.60367400 |
| O | 0.62113900  | 0.44196700  | 0.44294500  |
| F | 2.99823200  | -0.57900300 | -0.79249200 |
| F | 1.65050700  | 0.49766000  | -2.10243800 |
| F | 2.33019500  | -1.47636500 | -2.63883600 |

**TS7SS**

|   |             |             |             |
|---|-------------|-------------|-------------|
| C | -1.87212300 | 0.87990800  | 0.04160700  |
| C | -0.49453600 | 0.39162500  | 0.46958400  |
| H | -2.02937000 | 0.44941100  | -0.95143100 |
| C | -3.03219000 | 0.48129100  | 0.93562300  |
| C | -4.28469200 | 0.26768300  | 0.34836500  |
| C | -2.90804100 | 0.32087800  | 2.31810500  |
| C | -5.38780500 | -0.07781900 | 1.12119800  |
| H | -4.39307800 | 0.36629000  | -0.72950600 |
| C | -4.01136300 | -0.02961500 | 3.09326700  |
| H | -1.94746100 | 0.45021600  | 2.80718400  |
| C | -5.25434900 | -0.22449900 | 2.49943800  |
| H | -6.34925500 | -0.24047600 | 0.64505300  |
| H | -3.89361100 | -0.15457500 | 4.16487000  |
| H | -6.11188900 | -0.49832100 | 3.10523800  |
| C | 0.58914100  | 0.67334300  | -0.65294600 |
| O | 0.26700300  | 0.54988100  | -1.83101700 |
| H | -0.50240200 | -0.67441500 | 0.71215800  |
| C | -0.30131800 | 2.45413000  | 1.83398200  |
| C | 0.04687400  | 3.38255100  | 2.85627400  |
| H | 0.79520200  | 3.20748900  | 3.61528200  |
| C | -0.75415600 | 4.48628000  | 2.69614800  |
| H | -0.77710500 | 5.37933800  | 3.30132300  |
| C | -1.57772600 | 4.25248300  | 1.56757700  |
| H | -2.32478200 | 4.89374700  | 1.12685000  |
| N | -1.32032400 | 3.04781700  | 1.06795200  |
| C | 0.13543200  | 1.18865800  | 1.54877300  |
| O | 1.65461400  | 1.08239400  | -0.11752700 |
| C | 1.12874800  | 0.54197000  | 2.48994300  |
| F | 1.54186900  | -0.64077900 | 2.05589100  |
| F | 0.51085400  | 0.34286300  | 3.67485800  |
| F | 2.18540200  | 1.31648700  | 2.72191300  |
| C | -1.78028900 | 2.41866300  | -0.17580000 |
| H | -1.00512900 | 2.59939600  | -0.92910800 |
| C | -3.10069000 | 2.98469000  | -0.68773000 |
| O | -3.82908000 | 3.63551500  | 0.03376900  |

|   |             |            |             |
|---|-------------|------------|-------------|
| C | -3.46620100 | 2.66560800 | -2.09849400 |
| C | -2.58871100 | 2.04274700 | -2.99648300 |
| C | -4.75680500 | 3.01785700 | -2.51315900 |
| C | -3.00910700 | 1.78380700 | -4.29781200 |
| H | -1.58492300 | 1.73964100 | -2.70478700 |
| C | -5.16913100 | 2.75261400 | -3.81101000 |
| H | -5.41917900 | 3.49540400 | -1.79878800 |
| C | -4.29326600 | 2.13611500 | -4.70496800 |
| H | -2.32865800 | 1.30310200 | -4.99214200 |
| H | -6.17031800 | 3.02434600 | -4.12821200 |
| H | -4.61420100 | 1.92801200 | -5.72073300 |

**TS7RS**

|   |             |             |             |
|---|-------------|-------------|-------------|
| C | -2.81743600 | -0.31823600 | -0.31802200 |
| C | -1.36548700 | -0.44997800 | -0.77895100 |
| H | -3.38388100 | -0.03718200 | -1.21335300 |
| C | -3.04518600 | 0.72935900  | 0.75810400  |
| C | -4.27584300 | 1.39169800  | 0.80185300  |
| C | -2.08740000 | 1.02998600  | 1.72872600  |
| C | -4.55021100 | 2.32362500  | 1.79724000  |
| H | -5.02138200 | 1.19168000  | 0.03550600  |
| C | -2.35938200 | 1.96488500  | 2.72525300  |
| H | -1.11287200 | 0.55111500  | 1.71785900  |
| C | -3.59115300 | 2.60983200  | 2.76585600  |
| H | -5.50784500 | 2.83353500  | 1.81011600  |
| H | -1.60194800 | 2.18846800  | 3.46920300  |
| H | -3.79934600 | 3.33897900  | 3.54160100  |
| C | -1.19543800 | -1.28255000 | -2.06307300 |
| O | -1.92413500 | -1.18236300 | -3.04412500 |
| H | -0.92379700 | 0.54120300  | -0.91958100 |
| C | -1.03785000 | -2.17580500 | 0.98978200  |
| C | -0.47789600 | -3.01511500 | 1.99278300  |
| H | 0.58009300  | -3.13810200 | 2.17330100  |
| C | -1.52268700 | -3.59465900 | 2.67608200  |
| H | -1.46829500 | -4.27549700 | 3.51135600  |
| C | -2.71736000 | -3.12553600 | 2.08527400  |
| H | -3.74445800 | -3.36277800 | 2.33150900  |
| N | -2.42979300 | -2.27830500 | 1.10426900  |
| C | -0.48106900 | -1.31995600 | 0.07336700  |
| C | -3.35895300 | -1.69737000 | 0.14563100  |
| H | -4.31130000 | -1.54915900 | 0.66296500  |
| C | -3.55596400 | -2.70357700 | -1.01415900 |
| O | -2.81558400 | -3.65844000 | -1.09632800 |
| C | -4.65553100 | -2.46405400 | -1.98971000 |

|   |             |             |             |
|---|-------------|-------------|-------------|
| C | -5.64712800 | -1.49646300 | -1.80275400 |
| C | -4.69233000 | -3.28181000 | -3.12444500 |
| C | -6.65696200 | -1.34247000 | -2.74821400 |
| H | -5.65562500 | -0.86698500 | -0.91782700 |
| C | -5.69509400 | -3.12049000 | -4.07098900 |
| H | -3.92361200 | -4.04031700 | -3.23720500 |
| C | -6.67662400 | -2.14648900 | -3.88501300 |
| H | -7.42796700 | -0.59447200 | -2.59717600 |
| H | -5.72130000 | -3.75555100 | -4.95090800 |
| H | -7.45737900 | -2.01489000 | -4.62674600 |
| O | -0.23565200 | -2.10622200 | -1.87043100 |
| C | 1.00111300  | -1.01870500 | 0.16472300  |
| F | 1.23287100  | -0.36193100 | 1.31581700  |
| F | 1.73461800  | -2.12835800 | 0.17724100  |
| F | 1.41563600  | -0.23883900 | -0.82976900 |
| C | -2.32056500 | -2.44745500 | -5.84076000 |
| C | -3.05233900 | -3.12470500 | -6.99815900 |
| H | -2.86995500 | -2.55011100 | -4.90191700 |
| H | -3.33141300 | -4.15544200 | -6.73365800 |
| N | -1.04937300 | -3.19340000 | -5.69880100 |
| O | -2.22419200 | -3.11240700 | -8.15013100 |
| C | -0.46101200 | -3.88210300 | -6.72874200 |
| C | -1.15972200 | -4.02872700 | -8.05219100 |
| H | -0.46337500 | -3.82834200 | -8.86775500 |
| H | -1.51896500 | -5.06386700 | -8.14228700 |
| N | 0.67302700  | -4.40607000 | -6.35486600 |
| C | -0.23354000 | -3.31051900 | -4.64502400 |
| N | 0.79583100  | -4.03902800 | -5.05038300 |
| C | 1.93787400  | -4.42081000 | -4.26185000 |
| C | 2.74412000  | -3.41259100 | -3.72146100 |
| C | 2.17361400  | -5.78429100 | -4.06837400 |
| C | 3.83183900  | -3.82134100 | -2.95378300 |
| C | 3.27968000  | -6.13303300 | -3.29524600 |
| C | 4.11612900  | -5.16995300 | -2.73191800 |
| H | 4.47968100  | -3.06248600 | -2.52230900 |
| H | 3.48597200  | -7.18626000 | -3.12479400 |
| H | -3.95252300 | -2.55911300 | -7.24163100 |
| C | -2.02673500 | -0.96736600 | -6.11722100 |
| H | -1.42952800 | -0.58387700 | -5.28569400 |
| H | -1.44171400 | -0.89634000 | -7.03944200 |
| C | -3.31316300 | -0.18744900 | -6.25152800 |
| C | -4.11677600 | 0.05124100  | -5.13199700 |
| C | -3.73666200 | 0.26550500  | -7.50346700 |
| C | -5.31348800 | 0.75001500  | -5.26804800 |

|   |             |             |             |
|---|-------------|-------------|-------------|
| H | -3.79158400 | -0.30699300 | -4.15636900 |
| C | -4.93538100 | 0.96166200  | -7.63785800 |
| H | -3.12049000 | 0.06775300  | -8.37725900 |
| C | -5.72492100 | 1.20814300  | -6.51797300 |
| H | -5.92618000 | 0.93884200  | -4.39186100 |
| H | -5.25030200 | 1.31255900  | -8.61528800 |
| H | -6.65700200 | 1.75491400  | -6.61855700 |
| C | 5.30513400  | -5.56437400 | -1.89587900 |
| H | 6.22831500  | -5.15913100 | -2.31941800 |
| H | 5.21153400  | -5.17002300 | -0.87998200 |
| H | 5.40567900  | -6.64922700 | -1.83349200 |
| C | 2.46397700  | -1.94746700 | -3.93547300 |
| H | 2.13920500  | -1.74087300 | -4.95954900 |
| H | 1.68592400  | -1.59915300 | -3.24792700 |
| H | 3.36645900  | -1.36488800 | -3.74387300 |
| C | 1.27414900  | -6.83909600 | -4.65649600 |
| H | 0.21886900  | -6.58222800 | -4.52295300 |
| H | 1.45002300  | -6.95142000 | -5.72958600 |
| H | 1.45608700  | -7.80036400 | -4.17426700 |
| H | -0.36959700 | -2.90659500 | -3.64056900 |

**TS7RS'**

|   |             |             |             |
|---|-------------|-------------|-------------|
| C | -2.76633900 | -0.70655000 | -0.21543200 |
| C | -1.30546500 | -0.87261200 | -0.62185100 |
| H | -3.33555000 | -0.73817700 | -1.15163400 |
| C | -3.08454900 | 0.58991000  | 0.50835300  |
| C | -4.36692500 | 1.13241600  | 0.37266800  |
| C | -2.16329900 | 1.24465300  | 1.32798700  |
| C | -4.72445700 | 2.29644800  | 1.04416600  |
| H | -5.08451700 | 0.64184200  | -0.28196800 |
| C | -2.51884000 | 2.41217000  | 2.00048500  |
| H | -1.15428600 | 0.85913900  | 1.44198700  |
| C | -3.79923500 | 2.93915400  | 1.86404000  |
| H | -5.72069100 | 2.70828500  | 0.91882600  |
| H | -1.78862100 | 2.91079100  | 2.62961100  |
| H | -4.07256000 | 3.85001700  | 2.38641900  |
| C | -1.07157600 | -2.05123700 | -1.68618900 |
| O | -1.92128300 | -2.21039700 | -2.55117800 |
| H | -0.91782800 | 0.04747000  | -1.06753000 |
| C | -0.89630000 | -2.04553800 | 1.51883900  |
| C | -0.28079900 | -2.60223900 | 2.67414200  |
| H | 0.78287000  | -2.60715700 | 2.86143600  |
| C | -1.28369700 | -3.09759300 | 3.47677000  |
| H | -1.18318800 | -3.58006100 | 4.43663300  |

|   |             |             |             |
|---|-------------|-------------|-------------|
| C | -2.50573500 | -2.85550400 | 2.81017700  |
| H | -3.51398400 | -3.10971400 | 3.10966300  |
| N | -2.27564300 | -2.21881300 | 1.66845900  |
| C | -0.40366800 | -1.38059500 | 0.42543400  |
| C | -3.24384300 | -1.92203900 | 0.62123200  |
| H | -4.18294800 | -1.66088900 | 1.11761700  |
| C | -3.45548300 | -3.18760900 | -0.24025200 |
| O | -2.71623400 | -4.13507600 | -0.10771500 |
| C | -4.58233100 | -3.17056000 | -1.21487700 |
| C | -5.74711200 | -2.42767200 | -1.00374900 |
| C | -4.45181200 | -3.95366700 | -2.36545800 |
| C | -6.78129300 | -2.47787000 | -1.93414800 |
| H | -5.87380900 | -1.82511400 | -0.10873800 |
| C | -5.48013000 | -3.99072500 | -3.29687200 |
| H | -3.52248300 | -4.49024200 | -2.52145700 |
| C | -6.64624600 | -3.25645600 | -3.08015600 |
| H | -7.69064900 | -1.91176300 | -1.76238100 |
| H | -5.37296300 | -4.58625400 | -4.19727500 |
| H | -7.44998200 | -3.28928300 | -3.80883800 |
| O | -0.01324300 | -2.66950500 | -1.40921500 |
| C | 1.06418700  | -1.01021000 | 0.41080700  |
| F | 1.26331800  | -0.09746500 | 1.38920900  |
| F | 1.85550100  | -2.04634100 | 0.67330000  |
| F | 1.43864000  | -0.44969100 | -0.72996100 |

**TS7RS''**

|   |             |             |             |
|---|-------------|-------------|-------------|
| C | -2.63121900 | -0.63354600 | -0.37444700 |
| C | -1.19774600 | -0.27782100 | -0.78124900 |
| H | -3.21900900 | -0.56204400 | -1.29596700 |
| C | -3.23605800 | 0.29333300  | 0.66464300  |
| C | -4.59889300 | 0.59364100  | 0.58354000  |
| C | -2.49013200 | 0.83143800  | 1.71610100  |
| C | -5.20968800 | 1.40026000  | 1.53833600  |
| H | -5.18345000 | 0.21129400  | -0.25019200 |
| C | -3.09952400 | 1.64234800  | 2.67060500  |
| H | -1.42386700 | 0.64090800  | 1.79660200  |
| C | -4.45993600 | 1.92348000  | 2.58858600  |
| H | -6.26697100 | 1.62894000  | 1.45494600  |
| H | -2.50536000 | 2.05786100  | 3.47777100  |
| H | -4.93101400 | 2.55692900  | 3.33266900  |
| C | -0.74011700 | -1.00278900 | -2.05304500 |
| O | -1.46433200 | -1.08209000 | -3.05453500 |
| H | -1.10122300 | 0.80555200  | -0.90120100 |
| C | -0.38998500 | -1.80787800 | 1.01905600  |

|   |             |             |             |
|---|-------------|-------------|-------------|
| C | 0.37683900  | -2.40575400 | 2.05896800  |
| H | 1.41197100  | -2.17892200 | 2.26933700  |
| C | -0.45077400 | -3.27285800 | 2.73449000  |
| H | -0.20894600 | -3.88170000 | 3.59185700  |
| C | -1.71381200 | -3.22039800 | 2.10224200  |
| H | -2.61882600 | -3.76698700 | 2.33277200  |
| N | -1.67943800 | -2.34673900 | 1.10333600  |
| C | -0.11061200 | -0.82801000 | 0.10305700  |
| C | -2.71243400 | -2.11076700 | 0.10455600  |
| H | -3.67847600 | -2.27172400 | 0.59185600  |
| C | -2.53927500 | -3.15119700 | -1.02992300 |
| O | -1.50584300 | -3.78267100 | -1.09693300 |
| C | -3.66039800 | -3.35973200 | -1.98541100 |
| C | -4.88562300 | -2.69396800 | -1.87904700 |
| C | -3.46193700 | -4.28416900 | -3.01764500 |
| C | -5.89137100 | -2.93233100 | -2.80990500 |
| H | -5.07353900 | -1.99257700 | -1.07177900 |
| C | -4.46593500 | -4.51816800 | -3.94667700 |
| H | -2.51568200 | -4.81485700 | -3.06891600 |
| C | -5.67997800 | -3.83821800 | -3.84630800 |
| H | -6.83963700 | -2.41314500 | -2.72500100 |
| H | -4.30553200 | -5.23368800 | -4.74673900 |
| H | -6.46534200 | -4.02008500 | -4.57251600 |
| O | 0.38628000  | -1.54406700 | -1.84382600 |
| C | 1.19618600  | -0.07133700 | 0.22139000  |
| F | 1.15448300  | 0.66270800  | 1.34823800  |
| F | 2.23883800  | -0.89328200 | 0.31013200  |
| F | 1.38405100  | 0.76133500  | -0.79428900 |
| C | -1.29483200 | -3.69986600 | -5.46227500 |
| C | -1.08095900 | -4.96045000 | -5.95098200 |
| C | -0.19358800 | -5.84227900 | -5.26782300 |
| C | 0.42528000  | -5.34136100 | -4.08780100 |
| C | 0.16279400  | -4.06499600 | -3.66417100 |
| H | -1.97172200 | -3.00041500 | -5.93824300 |
| H | -1.59182800 | -5.26081400 | -6.85460300 |
| H | 1.10737000  | -5.94659500 | -3.50806300 |
| H | 0.59322500  | -3.62425000 | -2.77156100 |
| C | 0.95595700  | -7.96237200 | -4.99260400 |
| C | -0.61910900 | -7.56649300 | -6.92323800 |
| H | 0.59521300  | -8.15509400 | -3.97721200 |
| H | 1.02522100  | -8.91145800 | -5.51918700 |
| H | 1.95701400  | -7.52370600 | -4.93826600 |
| H | -1.70744600 | -7.55923100 | -6.80508300 |
| H | -0.35025700 | -6.95345000 | -7.78906100 |

|   |             |             |             |
|---|-------------|-------------|-------------|
| H | -0.30246600 | -8.58917800 | -7.11520000 |
| N | 0.04149900  | -7.08580900 | -5.71535200 |
| N | -0.68023600 | -3.26556300 | -4.34641500 |
| H | -0.92097100 | -2.32072200 | -3.93980100 |

**TS7RS'''**

|   |             |             |             |
|---|-------------|-------------|-------------|
| C | 4.16233000  | -0.36017000 | 0.36587200  |
| C | 5.28144700  | 0.11736700  | 1.28528100  |
| H | 3.55906100  | -1.10965900 | 0.87258800  |
| H | 4.88303300  | 0.31257600  | 2.29128300  |
| N | 3.29853800  | 0.81481500  | 0.11795200  |
| O | 5.89761600  | 1.28445000  | 0.76396300  |
| C | 3.71020900  | 2.10534700  | 0.30518000  |
| C | 5.05610600  | 2.40487400  | 0.89973900  |
| H | 5.51437200  | 3.24348400  | 0.37385000  |
| H | 4.92946000  | 2.67660200  | 1.95786300  |
| N | 2.79566600  | 2.95011300  | -0.07460400 |
| C | 2.05938200  | 0.86932900  | -0.41150000 |
| N | 1.77839700  | 2.16602100  | -0.53116000 |
| C | 0.57043900  | 2.79790600  | -0.99091200 |
| C | 0.36412300  | 2.92948800  | -2.36790100 |
| C | -0.26609800 | 3.36505700  | -0.02849000 |
| C | -0.77944000 | 3.61419900  | -2.76899900 |
| C | -1.39006100 | 4.05030300  | -0.48679200 |
| C | -1.66324400 | 4.17873000  | -1.84625100 |
| H | -0.97308500 | 3.72947500  | -3.83274700 |
| H | -2.07147300 | 4.48369400  | 0.24028300  |
| H | 6.04834500  | -0.65683700 | 1.34938600  |
| C | 4.66550300  | -0.92734900 | -0.96743900 |
| H | 3.81425700  | -1.00429000 | -1.65279800 |
| H | 5.39327400  | -0.23271200 | -1.40016400 |
| C | 5.26610200  | -2.29444800 | -0.75105800 |
| C | 4.41883600  | -3.37747700 | -0.49127600 |
| C | 6.64694700  | -2.49265000 | -0.75606600 |
| C | 4.95062500  | -4.63898800 | -0.24615100 |
| H | 3.34215700  | -3.21406400 | -0.48696600 |
| C | 7.17928400  | -3.75702600 | -0.50920800 |
| H | 7.30778800  | -1.65286000 | -0.95835400 |
| C | 6.33199500  | -4.83115900 | -0.25426800 |
| H | 4.28623500  | -5.47515900 | -0.05147800 |
| H | 8.25492800  | -3.90176300 | -0.51910700 |
| H | 6.74571400  | -5.81659800 | -0.06513500 |
| C | -2.86664900 | 4.94927400  | -2.32228600 |
| H | -2.57335600 | 5.94373200  | -2.67441900 |



|   |             |             |             |
|---|-------------|-------------|-------------|
| H | -3.35583000 | 4.43600100  | -3.15464800 |
| H | -3.59662800 | 5.07158700  | -1.51934500 |
| C | 1.35909000  | 2.41027900  | -3.37032700 |
| H | 2.37153900  | 2.74376700  | -3.11960400 |
| H | 1.35374200  | 1.31835800  | -3.38750000 |
| H | 1.11783600  | 2.78147200  | -4.36767700 |
| C | 0.05578400  | 3.31633800  | 1.44162000  |
| H | 0.61904800  | 2.42109200  | 1.71401900  |
| H | 0.65902600  | 4.18522800  | 1.72455000  |
| H | -0.86688600 | 3.33506300  | 2.02592200  |
| C | -1.68539800 | -0.38991100 | -0.00881300 |
| C | -0.41339900 | -0.21742400 | 0.76815200  |
| H | -1.46037700 | -0.61812400 | -1.06513600 |
| C | -2.60365100 | 0.81257400  | 0.03990800  |
| C | -3.28644100 | 1.22429600  | -1.10595800 |
| C | -2.90223500 | 1.43615500  | 1.25552800  |
| C | -4.26994400 | 2.20769900  | -1.03570200 |
| H | -3.06440100 | 0.74279500  | -2.05545200 |
| C | -3.87186400 | 2.43245100  | 1.32794500  |
| H | -2.38652800 | 1.11524100  | 2.15794800  |
| C | -4.56812700 | 2.81377500  | 0.18188600  |
| H | -4.80753200 | 2.49798600  | -1.93357400 |
| H | -4.09596300 | 2.90002100  | 2.28260700  |
| H | -5.33895300 | 3.57673100  | 0.23940600  |
| C | 1.26705100  | -0.34390500 | -0.87166700 |
| O | 0.74382800  | -0.30449800 | -1.96357100 |
| H | -0.34435500 | 0.59342600  | 1.48036700  |
| C | -0.27783100 | -2.70278500 | 0.87560700  |
| C | 0.20286700  | -3.99146500 | 1.01417500  |
| H | 1.22878200  | -4.25252600 | 1.22774200  |
| C | -0.88190600 | -4.87083100 | 0.80005600  |
| H | -0.86051500 | -5.95028400 | 0.82071200  |
| C | -1.98963700 | -4.09388000 | 0.53517800  |
| H | -3.00491500 | -4.37412400 | 0.30017200  |
| N | -1.61826200 | -2.78195300 | 0.57099500  |
| C | 0.37273900  | -1.38755400 | 1.01329600  |
| C | -2.50550700 | -1.63054300 | 0.49348400  |
| H | -2.88194800 | -1.40988800 | 1.49706100  |
| C | -3.63981700 | -1.89780200 | -0.49455500 |
| O | -3.39251000 | -2.47238800 | -1.53718900 |
| C | -5.01631000 | -1.36747400 | -0.22909100 |
| C | -5.41550200 | -0.80512700 | 0.98655900  |
| C | -5.92762300 | -1.42214500 | -1.29074200 |
| C | -6.70167100 | -0.29175200 | 1.12963000  |

|   |             |             |             |
|---|-------------|-------------|-------------|
| H | -4.73325100 | -0.74804900 | 1.82639800  |
| C | -7.20998600 | -0.91254200 | -1.14586100 |
| H | -5.59918500 | -1.86151700 | -2.22662400 |
| C | -7.59764700 | -0.34102500 | 0.06615000  |
| H | -7.00133700 | 0.15004600  | 2.07439100  |
| H | -7.90741600 | -0.95463400 | -1.97617200 |
| H | -8.59787000 | 0.06483900  | 0.18084800  |
| O | 1.57547400  | -1.45724700 | -0.18546300 |
| C | 1.25033100  | -1.29649800 | 2.24526600  |
| F | 0.52933000  | -1.42953200 | 3.36192200  |
| F | 2.21915300  | -2.22762400 | 2.28481000  |
| F | 1.87797900  | -0.09886200 | 2.32387400  |

**TS7RS'''**

|   |             |             |             |
|---|-------------|-------------|-------------|
| C | 4.22864500  | -0.38511700 | 0.00937000  |
| C | 5.50450700  | 0.12427000  | 0.67818300  |
| H | 3.69931800  | -1.05545000 | 0.68362300  |
| H | 5.31214800  | 0.36916100  | 1.73208400  |
| N | 3.35282600  | 0.79319500  | -0.19842300 |
| O | 6.01608100  | 1.25523300  | -0.00408500 |
| C | 3.79437000  | 2.08574900  | -0.12485500 |
| C | 5.21945600  | 2.39145000  | 0.23487800  |
| H | 5.58797700  | 3.20648600  | -0.38909700 |
| H | 5.27304100  | 2.69865800  | 1.28894500  |
| N | 2.84063800  | 2.92485600  | -0.40930200 |
| C | 2.05507000  | 0.84382400  | -0.56824900 |
| N | 1.76541600  | 2.13603800  | -0.68894000 |
| C | 0.51645100  | 2.77575500  | -1.01485500 |
| C | 0.16379800  | 2.89803100  | -2.36287400 |
| C | -0.18947200 | 3.38141400  | 0.02599700  |
| C | -0.98656000 | 3.62806000  | -2.64726100 |
| C | -1.32932400 | 4.10737600  | -0.31755400 |
| C | -1.73612300 | 4.24530900  | -1.64245100 |
| H | -1.28876000 | 3.74408900  | -3.68518100 |
| H | -1.90961000 | 4.57637800  | 0.47302400  |
| H | 6.26323500  | -0.65969200 | 0.62885800  |
| C | 4.48940700  | -1.06981100 | -1.33707200 |
| H | 3.55167400  | -1.08684500 | -1.90506800 |
| H | 5.20267300  | -0.46336300 | -1.90588600 |
| C | 5.00390100  | -2.48333100 | -1.17649400 |
| C | 4.30657400  | -3.41323600 | -0.39437600 |
| C | 6.16315200  | -2.89460000 | -1.83673700 |
| C | 4.75747600  | -4.72704300 | -0.29025200 |
| H | 3.40197600  | -3.10804500 | 0.12726300  |

|   |             |             |             |
|---|-------------|-------------|-------------|
| C | 6.61203900  | -4.20960600 | -1.73633900 |
| H | 6.71558300  | -2.17985600 | -2.44068200 |
| C | 5.90854800  | -5.13083600 | -0.96512700 |
| H | 4.20754400  | -5.43599400 | 0.32221300  |
| H | 7.51375300  | -4.51179500 | -2.25901900 |
| H | 6.26122000  | -6.15374300 | -0.88119400 |
| C | -2.93675800 | 5.08269100  | -1.99647700 |
| H | -2.62506800 | 6.08705600  | -2.30098500 |
| H | -3.49146500 | 4.64238000  | -2.82904900 |
| H | -3.61249500 | 5.18050300  | -1.14425600 |
| C | 1.02608000  | 2.32645200  | -3.45560000 |
| H | 2.05993200  | 2.67204100  | -3.34922400 |
| H | 1.02616800  | 1.23455700  | -3.41823200 |
| H | 0.66150600  | 2.64859400  | -4.43200100 |
| C | 0.27707800  | 3.33121200  | 1.45747000  |
| H | 0.92589000  | 2.47615300  | 1.66335000  |
| H | 0.84343800  | 4.23579000  | 1.70007200  |
| H | -0.58396100 | 3.28104400  | 2.12872700  |
| C | -1.62614100 | -0.28747200 | -0.06219100 |
| C | -0.32803100 | -0.17506200 | 0.68682000  |
| H | -1.41839100 | -0.38404000 | -1.14200700 |
| C | -2.55420000 | 0.89484800  | 0.13093700  |
| C | -3.31749300 | 1.36234900  | -0.93909200 |
| C | -2.76786500 | 1.43945200  | 1.40150500  |
| C | -4.29560000 | 2.33437600  | -0.74315700 |
| H | -3.15805400 | 0.94298100  | -1.92996100 |
| C | -3.73163100 | 2.42531300  | 1.59729100  |
| H | -2.18546300 | 1.07285300  | 2.24392400  |
| C | -4.50539600 | 2.86873500  | 0.52500900  |
| H | -4.89335500 | 2.67465600  | -1.58317000 |
| H | -3.88765500 | 2.83887700  | 2.58908700  |
| H | -5.26724100 | 3.62674500  | 0.67851800  |
| C | 1.21525000  | -0.38892600 | -0.86771100 |
| O | 0.64996600  | -0.45833600 | -1.95924900 |
| H | -0.15243900 | 0.71883800  | 1.27121500  |
| C | -0.25227600 | -2.64777500 | 0.88991400  |
| C | 0.21020700  | -3.94327200 | 1.05547900  |
| H | 1.20659500  | -4.21632000 | 1.37008100  |
| C | -0.84542500 | -4.81250000 | 0.71092800  |
| H | -0.83194400 | -5.89216900 | 0.72377900  |
| C | -1.91900000 | -4.02534500 | 0.34208600  |
| H | -2.91497500 | -4.30089200 | 0.02708800  |
| N | -1.54944100 | -2.71666100 | 0.43172000  |
| C | 0.39241700  | -1.34781000 | 1.04041200  |

|   |             |             |             |
|---|-------------|-------------|-------------|
| C | -2.43661800 | -1.56364200 | 0.31810300  |
| H | -2.92580100 | -1.41258500 | 1.28490000  |
| C | -3.44810200 | -1.83714900 | -0.80207400 |
| O | -3.01466900 | -2.24556400 | -1.86729700 |
| C | -4.90210200 | -1.59848700 | -0.60438100 |
| C | -5.41982400 | -0.87930300 | 0.47917800  |
| C | -5.77190300 | -2.10339600 | -1.57985200 |
| C | -6.79086800 | -0.66952400 | 0.57940800  |
| H | -4.76356300 | -0.44362000 | 1.22564600  |
| C | -7.14060900 | -1.90647500 | -1.46710200 |
| H | -5.35139300 | -2.64742300 | -2.41882000 |
| C | -7.65078700 | -1.18735500 | -0.38634200 |
| H | -7.18700900 | -0.09810000 | 1.41198200  |
| H | -7.81147500 | -2.30685500 | -2.21961100 |
| H | -8.72068100 | -1.02724700 | -0.29919400 |
| O | 1.66540800  | -1.47444300 | -0.20687900 |
| C | 1.33001600  | -1.21910300 | 2.22124300  |
| F | 0.64883500  | -1.25646400 | 3.36798800  |
| F | 2.25812100  | -2.18699000 | 2.27077400  |
| F | 1.99817800  | -0.04653600 | 2.18945000  |
| C | -0.84707700 | -4.20857800 | -2.75531000 |
| C | -0.50880700 | -5.50282400 | -3.04728500 |
| C | 0.83419500  | -5.94532100 | -2.88580100 |
| C | 1.77362200  | -4.98516000 | -2.41776800 |
| C | 1.36593100  | -3.70799500 | -2.15173400 |
| H | -1.85326900 | -3.82127600 | -2.84812600 |
| H | -1.28419600 | -6.17063900 | -3.39403000 |
| H | 2.81509300  | -5.22853400 | -2.25502100 |
| H | 2.02644900  | -2.94233000 | -1.76667200 |
| C | 2.58806300  | -7.61806500 | -2.98208400 |
| C | 0.21467600  | -8.16760800 | -3.64308300 |
| H | 2.90475800  | -7.49110500 | -1.94160700 |
| H | 2.68219800  | -8.66931700 | -3.24531700 |
| H | 3.25417400  | -7.03625100 | -3.62697300 |
| H | -0.58640600 | -8.30928000 | -2.91074500 |
| H | -0.22298900 | -7.83706200 | -4.59037700 |
| H | 0.70400000  | -9.12524000 | -3.80603200 |
| N | 1.19987000  | -7.20821300 | -3.15921100 |
| N | 0.08277400  | -3.33201500 | -2.32552300 |
| H | -0.15969600 | -2.35929500 | -2.11332000 |

**PRR**

|   |             |             |            |
|---|-------------|-------------|------------|
| C | -1.74242300 | -0.95728400 | 0.17796400 |
| C | -0.51106700 | -0.42506000 | 0.86219900 |

|   |             |             |             |
|---|-------------|-------------|-------------|
| H | -1.78425400 | -0.54062700 | -0.83325000 |
| C | -3.01498000 | -0.52949000 | 0.89749800  |
| C | -4.05760800 | 0.04915300  | 0.17085300  |
| C | -3.17950200 | -0.74881300 | 2.26821900  |
| C | -5.24856000 | 0.40377600  | 0.79996000  |
| H | -3.93716400 | 0.21710700  | -0.89706200 |
| C | -4.37066100 | -0.39819100 | 2.89503800  |
| H | -2.37386000 | -1.19394900 | 2.84538100  |
| C | -5.40732400 | 0.17862600  | 2.16385000  |
| H | -6.04924600 | 0.85660600  | 0.22384500  |
| H | -4.48964200 | -0.57564400 | 3.95903000  |
| H | -6.33419100 | 0.45258600  | 2.65752800  |
| H | -0.22893900 | 0.60596700  | 0.68016900  |
| C | -0.21122000 | -2.55276300 | 2.00459600  |
| C | 0.20178900  | -3.47339900 | 2.94549700  |
| H | 0.94268300  | -3.29741200 | 3.71143500  |
| C | -0.54219800 | -4.65774600 | 2.72005600  |
| H | -0.48490100 | -5.57656200 | 3.28421800  |
| C | -1.38244200 | -4.42633700 | 1.65497400  |
| H | -2.10990800 | -5.06513200 | 1.18372500  |
| N | -1.19894900 | -3.13378900 | 1.23434900  |
| C | 0.17577000  | -1.18335700 | 1.72364200  |
| C | 1.36674900  | -0.64883900 | 2.45932400  |
| F | 1.65196500  | 0.61337100  | 2.11590600  |
| F | 2.46272400  | -1.38705300 | 2.22462000  |
| F | 1.16826800  | -0.66825300 | 3.78885800  |
| C | -1.65525400 | -2.50634800 | 0.00471800  |
| H | -0.91412700 | -2.71214400 | -0.77885900 |
| C | -3.02332800 | -3.01410600 | -0.45187600 |
| O | -3.74594600 | -3.64584100 | 0.28763400  |
| C | -3.48135300 | -2.61868600 | -1.82189200 |
| C | -2.61604400 | -2.18664400 | -2.83215000 |
| C | -4.85720300 | -2.67637200 | -2.06929500 |
| C | -3.12407800 | -1.81605700 | -4.07385000 |
| H | -1.54354100 | -2.14655100 | -2.66976500 |
| C | -5.36249500 | -2.29861900 | -3.30588600 |
| H | -5.51088100 | -3.00892200 | -1.26990100 |
| C | -4.49544200 | -1.86742400 | -4.30970600 |
| H | -2.44821400 | -1.48805700 | -4.85637400 |
| H | -6.43107000 | -2.33654800 | -3.48939100 |
| H | -4.88918400 | -1.57093900 | -5.27662900 |

**PRS**

|   |             |             |             |
|---|-------------|-------------|-------------|
| C | -1.87489600 | -0.57429100 | -0.29901700 |
|---|-------------|-------------|-------------|

|   |             |             |             |
|---|-------------|-------------|-------------|
| C | -0.76755000 | -0.24543000 | 0.66975800  |
| H | -1.42596700 | -0.95277600 | -1.22733700 |
| C | -2.73680000 | 0.62970800  | -0.62817100 |
| C | -3.13204800 | 0.88867000  | -1.94159700 |
| C | -3.17554200 | 1.47847200  | 0.39216400  |
| C | -3.94554200 | 1.98152000  | -2.23081800 |
| H | -2.80270000 | 0.22415100  | -2.73531200 |
| C | -3.98992800 | 2.56967300  | 0.10489900  |
| H | -2.86970500 | 1.28562100  | 1.41832600  |
| C | -4.37559200 | 2.82409800  | -1.20921000 |
| H | -4.24141200 | 2.17542200  | -3.25691000 |
| H | -4.32017500 | 3.22269200  | 0.90640900  |
| H | -5.00715700 | 3.67685200  | -1.43649200 |
| H | -0.36671700 | 0.76277900  | 0.66973100  |
| C | -0.77789400 | -2.53774600 | 1.47784100  |
| C | -0.34379600 | -3.72708600 | 2.02913400  |
| H | 0.56324400  | -3.85737400 | 2.60050300  |
| C | -1.28690800 | -4.72161100 | 1.67144900  |
| H | -1.24864300 | -5.77135700 | 1.92102900  |
| C | -2.26605300 | -4.11250100 | 0.91894800  |
| H | -3.15258300 | -4.52117800 | 0.45674500  |
| N | -1.94436400 | -2.78658700 | 0.78953800  |
| C | -0.25910300 | -1.18166600 | 1.47876500  |
| C | -2.76591200 | -1.70549100 | 0.25115700  |
| H | -3.38544500 | -1.29128200 | 1.05661900  |
| C | -3.66410300 | -2.25484700 | -0.87639700 |
| O | -3.23100100 | -2.30450500 | -2.00868700 |
| C | -5.04714400 | -2.70712800 | -0.55232900 |
| C | -5.49388100 | -2.88073800 | 0.76189300  |
| C | -5.90798900 | -2.98369300 | -1.62090000 |
| C | -6.79049200 | -3.32469500 | 1.00173000  |
| H | -4.83102100 | -2.69595200 | 1.60192000  |
| C | -7.20417100 | -3.41522200 | -1.37835200 |
| H | -5.53735600 | -2.84879500 | -2.63139000 |
| C | -7.64575700 | -3.58550100 | -0.06581800 |
| H | -7.13262100 | -3.46603300 | 2.02122400  |
| H | -7.87201100 | -3.62168600 | -2.20797000 |
| H | -8.65884500 | -3.92538500 | 0.12431700  |
| C | 0.86215400  | -0.87569800 | 2.42366100  |
| F | 0.49182200  | -1.05737800 | 3.70121100  |
| F | 1.91707800  | -1.68135400 | 2.21252300  |
| F | 1.29309100  | 0.38672600  | 2.30781100  |

**PSR**

|   |             |             |             |
|---|-------------|-------------|-------------|
| C | -0.97119800 | -1.29146900 | -1.17726600 |
| C | 0.33307900  | -1.65242900 | -1.84208300 |
| H | -0.85281000 | -0.31461400 | -0.68864700 |
| C | -2.12756600 | -1.20774800 | -2.15476500 |
| C | -3.05103300 | -0.16387900 | -2.07296900 |
| C | -2.30393300 | -2.19423300 | -3.12952300 |
| C | -4.12839000 | -0.10354300 | -2.95280300 |
| H | -2.92304300 | 0.59848600  | -1.30996800 |
| C | -3.38086800 | -2.13553000 | -4.00927500 |
| H | -1.58727400 | -3.00932200 | -3.20419600 |
| C | -4.29561700 | -1.08867400 | -3.92265300 |
| H | -4.83701500 | 0.71530900  | -2.88096000 |
| H | -3.50416400 | -2.90573200 | -4.76387000 |
| H | -5.13452500 | -1.04077100 | -4.60936900 |
| H | 0.47840600  | -1.37220900 | -2.88022200 |
| C | 1.13052100  | -2.62338800 | 0.23843900  |
| C | 1.98933700  | -3.04891000 | 1.23257300  |
| H | 3.05598700  | -3.17850000 | 1.12409000  |
| C | 1.21197500  | -3.24303300 | 2.40061400  |
| H | 1.56650000  | -3.55805100 | 3.37048200  |
| C | -0.09284200 | -2.93461500 | 2.08599500  |
| H | -0.98457700 | -2.94778000 | 2.69542300  |
| N | -0.13545900 | -2.54222500 | 0.77353800  |
| C | 1.30885300  | -2.25680200 | -1.15505500 |
| C | -1.30948800 | -2.29986700 | -0.06101600 |
| H | -1.61636400 | -3.24221600 | -0.53205300 |
| C | -2.45397600 | -1.74832600 | 0.81303100  |
| O | -2.51020500 | -0.55688100 | 1.03469200  |
| C | -3.46921700 | -2.69163800 | 1.36173100  |
| C | -3.28331100 | -4.07813700 | 1.36230700  |
| C | -4.63222000 | -2.14621600 | 1.91733600  |
| C | -4.25406500 | -4.90884000 | 1.91324100  |
| H | -2.37408600 | -4.51588800 | 0.96118800  |
| C | -5.60517800 | -2.97826300 | 2.45303300  |
| H | -4.75194500 | -1.06805300 | 1.91311900  |
| C | -5.41554700 | -4.36058700 | 2.45134700  |
| H | -4.10316500 | -5.98285900 | 1.92148500  |
| H | -6.51072500 | -2.55425300 | 2.87374000  |
| H | -6.17448100 | -5.01199200 | 2.87274700  |
| C | 2.62753200  | -2.58339100 | -1.78532300 |
| F | 3.64505200  | -2.01801200 | -1.11286300 |
| F | 2.70437500  | -2.16264500 | -3.05385600 |

|   |            |             |             |
|---|------------|-------------|-------------|
| F | 2.85808000 | -3.90648400 | -1.78631800 |
|---|------------|-------------|-------------|

**PSS**

|   |             |             |             |
|---|-------------|-------------|-------------|
| C | -1.80788300 | 0.92302300  | 0.06461000  |
| C | -0.59525700 | 0.33302000  | 0.73449100  |
| H | -1.86845100 | 0.52745800  | -0.95399100 |
| C | -3.09476400 | 0.53208100  | 0.77956300  |
| C | -4.15954500 | 0.00588200  | 0.04535000  |
| C | -3.24921900 | 0.73317300  | 2.15430100  |
| C | -5.36198000 | -0.31517100 | 0.67068100  |
| H | -4.04704100 | -0.14918300 | -1.02541100 |
| C | -4.45153600 | 0.41582700  | 2.77746300  |
| H | -2.42659000 | 1.13560300  | 2.73865000  |
| C | -5.51027300 | -0.10854500 | 2.03863700  |
| H | -6.17978600 | -0.72720400 | 0.08802000  |
| H | -4.56180200 | 0.57820700  | 3.84481500  |
| H | -6.44595900 | -0.35639100 | 2.52943200  |
| H | -0.34776500 | -0.70250700 | 0.52911100  |
| C | -0.22045700 | 2.42458000  | 1.92116500  |
| C | 0.22073700  | 3.30887100  | 2.88389200  |
| H | 0.95241000  | 3.08994400  | 3.64763600  |
| C | -0.48235000 | 4.52244800  | 2.68407200  |
| H | -0.39601900 | 5.42590500  | 3.26899700  |
| C | -1.32701500 | 4.34405300  | 1.61225900  |
| H | -2.03064100 | 5.01856200  | 1.15504900  |
| N | -1.18623900 | 3.05619100  | 1.16248900  |
| C | 0.11911800  | 1.04892700  | 1.60999500  |
| C | 1.29650100  | 0.45936400  | 2.32508700  |
| F | 1.52550500  | -0.80972300 | 1.96549200  |
| F | 1.11627300  | 0.47270100  | 3.65727800  |
| F | 2.41837200  | 1.15519500  | 2.08279700  |
| C | -1.66040100 | 2.47010600  | -0.08043900 |
| H | -0.90745400 | 2.66053500  | -0.85654500 |
| C | -3.00529800 | 3.03744600  | -0.53516100 |
| O | -3.70844300 | 3.68341100  | 0.21084500  |
| C | -3.47000300 | 2.68206500  | -1.91387200 |
| C | -2.61568800 | 2.23596700  | -2.92737400 |
| C | -4.84161900 | 2.79312100  | -2.16663300 |
| C | -3.13036500 | 1.90380800  | -4.17710800 |
| H | -1.54610200 | 2.15499400  | -2.76117100 |
| C | -5.35387500 | 2.45356900  | -3.41137400 |
| H | -5.48690200 | 3.13562200  | -1.36465300 |
| C | -4.49778800 | 2.00798600  | -4.41830900 |
| H | -2.46255000 | 1.56500500  | -4.96191900 |



|   |             |            |             |
|---|-------------|------------|-------------|
| H | -6.41952100 | 2.53293100 | -3.59884200 |
| H | -4.89707300 | 1.74226000 | -5.39191000 |
